# Supplementary material
Source: PubMed Central journal article supplement (PMC6469987)
Supplement: NIHMS998645-supplement-Supporting_Information.pdf [file NIHMS998645-supplement-Supporting_Information.pdf]

# Supporting Information

## Branch-Selective Addition of Unactivated Olefins into Imines and Aldehydes

Jeishla L. M. Matos, Suhelen Vásquez-Céspedes, Jieyu Gu, Takuya Oguma, Ryan A. Shenvi\*

\*Correspondance to: rshenvi@scripps.edu

*Department of Chemistry, The Scripps Research Institute, 10550 N Torrey Pines Rd, La Jolla, CA 92037, United States*

### Table of Content

|                                                                 |               |
|-----------------------------------------------------------------|---------------|
| <b>A. Materials and Methods</b>                                 | <b>SI-2</b>   |
| <b>B. Note on the toxicity of Cr<sup>+n</sup></b>               | <b>SI-2</b>   |
| <b>C. Abbreviations</b>                                         | <b>SI-2</b>   |
| <b>D. Synthesis of Starting Materials</b>                       | <b>SI-2</b>   |
| <b>E. Optimization of Imine Coupling</b>                        | <b>SI-9</b>   |
| <b>F. Determination of Stereochemistry</b>                      | <b>SI-10</b>  |
| <b>G. General Procedures</b>                                    | <b>SI-11</b>  |
| <b>H. Characterization of unnatural amino acids derivatives</b> | <b>SI-13</b>  |
| <b>I. Characterization of alcohol derivatives</b>               | <b>SI-25</b>  |
| <b>J. NMR Spectra</b>                                           | <b>SI-51</b>  |
| <b>K. References</b>                                            | <b>SI-138</b> |

## A. Materials and methods

All reactions were carried out under positive pressure of argon in a fume hood unless otherwise noted. Hexanes (ACS grade), ethyl acetate (ACS grade), diethyl ether (anhydrous ACS grade), dichloromethane (ACS grade), acetonitrile (ACS grade), chloroform (ACS grade), and isopropanol (ACS grade) were purchased from Fisher Chemical and used without further purification. Anhydrous tetrahydrofuran, dimethoxyethane, and acetonitrile were purchased from Sigma-Aldrich. Anhydrous ethanol was obtained from Pharmco-Aaper.  $\text{Fe}(\text{acac})_3$  was purchased from Sigma Aldrich at 99.9% purity.  $\text{CrCl}_3$ -anhydrous was purchased from Strem at 99% purity. Commercially available substrates were purchased from Sigma, Aldrich, Fluka, Oakwood, TCI Chemicals, Alfa Aesar, Fischer, Matrix Scientific, Combi-Blocks, ArK Pharm, Astatech and used without further purification unless otherwise noted.  $\text{PhSiH}_2(\text{O}i\text{-Pr})^i$  and  $\text{Co}(\text{Sal}^{t\text{-Bu},t\text{-Bu}})^{ii}$  were prepared following previously reported procedures.

The reactions were monitored by thin layer chromatography (TLC) using precoated silica gel plates from EMD Chemicals (TLC Silica gel 60 F254); by GC/MS analysis performed on Agilent 7820A/5975 GC/MSD system with helium as the carrier gas; or by LC/MS on an Agilent 6120 Quadrupole system with an ESI probe. Flash column chromatography was performed over Silica gel 60 (particle size 0.04-0.063 mm) from Fischer Scientific.  $^1\text{H}$  NMR and  $^{13}\text{C}$  NMR spectra were recorded on Bruker DPX-400, a Bruker DPX-500 or Bruker DPX-600 equipped with cryoprobe, and the residual solvent peaks were used as internal standard ( $\text{CDCl}_3$  @ 7.26 ppm  $^1\text{H}$  NMR, 77.16 ppm  $^{13}\text{C}$  NMR;  $\text{C}_6\text{D}_6$  @ 7.16 ppm  $^1\text{H}$  NMR, 128.06 ppm  $^{13}\text{C}$  NMR). NMR data is denoted with apparent multiplicities: s = singlet, d = doublet, t = triplet, q = quartet, and combinations thereof.

## B. Note on the toxicity of $\text{Cr}^{+n}$ salts

Even though  $\text{Cr}^{+2}$  and  $\text{Cr}^{+3}$  are considered to be less toxic than  $\text{Cr}^{+6}$  (Oral-rat  $\text{LD}_{50}$  = 1870 mg/kg and > 2700 mg/kg respectively vs. 50–150 mg/kg for  $\text{Cr}^{+6}$ . See ref. 37 in the manuscript), trace oxidation of  $\text{Cr}^{+3}$  to  $\text{Cr}^{+6}$  can occur in the presence of air and elevated temperatures or in the presence of air and acidic conditions.<sup>iii</sup> We observe no oxidation of the alcohols to the ketone, and the benzaldehydes are almost always reduced by the end of the reaction (presence of  $\text{Cr}^{+6}$  would suggest that it should be oxidized). Nevertheless, all of the reaction procedure, including work up and purification, should be performed in a well-ventilated fume hood, and waste disposal should always be done in a separated labelled container.

## C. Abbreviations

DMAP: 4-Dimethylaminopyridine

EDC: *N*-(3-Dimethylaminopropyl)-*N'*-ethylcarbodiimide hydrochloride

FCC: flash column chromatography

GC: gas chromatography

IY: isolated yield

LC: liquid chromatography

MS: mass spectrometry

Pyr-F( $\text{BF}_4$ ): 1-Fluoro-2,4,6-trimethylpyridinium tetrafluoroborate

Salen: 6,6'-(Cyclohexane-1,2-diylbis(azanilylidene))bis(methanylylidene))bis(2,4-di-*tert*-butylphenol)

## D. Synthesis of Starting Materials

The tolyl- and mesityl-derived imines were synthesized following a known procedure<sup>iv</sup> from commercially available starting materials.

**Note:** Commercial bottles of (*S*)-4-methylbenzenesulfonamide decompose over time into sulfinic acid (as determined by  $^1\text{H}$  NMR in  $\text{MeOD-d}_4$  and LC/MS mass). The presence of the sulfinic acid is detrimental to the

synthesis of the imine and purification is necessary. We found that running a small SiO<sub>2</sub> plug of the starting material using CHCl<sub>3</sub> as the eluent was enough to remove the sulfinic acid, which is not soluble in chloroform. Although the same decomposition could be possible with the mesityl-derived sulfinamide, we did not encounter it. However, if synthesis of this imine is found to be problematic, sulfinic acid formation should be considered.

Similarly, in our experience it is best to depolymerize ethyl glyoxylate prior to condensation with the sulfinimine by heating it at 50 °C for 5 minutes.

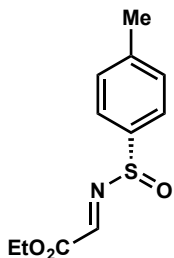

#### ethyl (*S*)-2-((*p*-tolylsulfinyl)imino)acetate

Synthesized according to the reported procedure.<sup>iv</sup> Purification by flash column chromatography (SiO<sub>2</sub>, 9:1 hexanes/EtOAc) delivered the desired imine as a colorless oil.

<sup>1</sup>H NMR (400 MHz, CDCl<sub>3</sub>) δ 8.13 (t, *J* = 1.1 Hz, 1H), 7.59 (d, *J* = 7.9 Hz, 2H), 7.31 (d, *J* = 7.9 Hz, 2H), 4.34 (q, *J* = 7.2 Hz, 1H), 2.39 (s, 3H), 1.34 (t, *J* = 7.1 Hz, 2H).

<sup>13</sup>C NMR (151 MHz, CDCl<sub>3</sub>) δ 161.40, 153.23, 142.70, 139.33, 130.26, 124.87, 62.75, 21.61, 14.17.

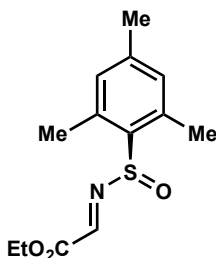

#### ethyl (*R*)-2-((mesitylsulfinyl)imino)acetate

Synthesized according to the reported procedure.<sup>iv</sup> Purification by flash column chromatography (SiO<sub>2</sub>, 100% dichloromethane) delivered the desired imine as a white solid.

<sup>1</sup>H NMR (600 MHz, CDCl<sub>3</sub>) δ 8.24 (s, 1H), 6.86 (s, 2H), 4.37 (qq, *J* = 7.0, 3.8 Hz, 2H), 2.45 (s, 6H), 2.28 (s, 3H), 1.37 (t, *J* = 7.1 Hz, 3H).

<sup>13</sup>C NMR (151 MHz, CDCl<sub>3</sub>) δ 161.54, 154.05, 142.64, 138.93, 133.16, 131.19, 62.76, 21.25, 19.00, 14.20.

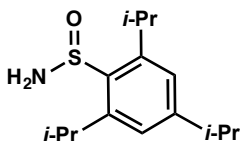

#### 2,4,6-triisopropylbenzenesulfinamide

The title compound was prepared according to a reported procedure<sup>v</sup> and the spectroscopy data matched those ones reported.

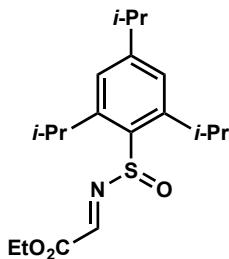

### ethyl 2-(((2,4,6-triisopropylphenyl)sulfinyl)imino)acetate

The title compound was synthesized by stirring ethyl glyoxylate (2.24 mmol, 0.5 mL of a 50% solution in PhMe), the sulfinamide (600 mg, 2.24 mmol), and 4Å molecular sieves (3 g, 1.3g/mmol) in DCM (10 mL, 0.2 M) at room temperature until completion by TLC. The mixture was then filtered through Celite washing with DCM, and evaporated under reduced pressure. The crude was purified by flash column chromatography (SiO<sub>2</sub>, 9:1 hexanes/EtOAc) which delivered 490 mg (62%) of the compound as a clear, viscous oil.

<sup>1</sup>H NMR (600 MHz, CDCl<sub>3</sub>) δ 8.28 (s, 1H), 7.07 (s, 2H), 4.38 (qd, *J* = 7.2, 1.2 Hz, 2H), 3.66 (hept, *J* = 6.8 Hz, 2H), 2.88 (hept, *J* = 6.9 Hz, 1H), 1.35 (t, *J* = 7.1 Hz, 3H), 1.26 (d, *J* = 6.8 Hz, 6H), 1.23 (d, *J* = 7.0 Hz, 6H), 1.20 (d, *J* = 6.9 Hz, 6H).

<sup>13</sup>C NMR (151 MHz, CDCl<sub>3</sub>) δ 161.59, 154.09, 153.81, 150.19, 132.65, 123.42, 62.67, 34.59, 28.29, 24.36, 24.05, 23.87, 23.85, 14.22.

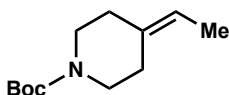

### tert-butyl 4-ethylidenepiperidine-1-carboxylate

The title compound was synthesized following a modified procedure.<sup>vi</sup>

To a solution of ethyltriphenylphosphonium bromide (2.4 g, 6.5 mmol) in THF (20 mL) at -78 °C was added *n*-BuLi dropwise (3.1 mL, 6.5 mmol) over 5 minutes, then the mixture was warmed to room temperature and stirred for 30 minutes. The reaction mixture was cooled back to -78 °C and a 1 M solution of the ketone (1 gram, 5 mL in THF) was added dropwise over 5 minutes. After 20 minutes, the solution was warmed to room temperature and stirred for 18 hours. The reaction mixture was filtered through Celite and concentrated under reduced pressure. Purification by flash column chromatography (SiO<sub>2</sub>, hexanes then 9:1 hexanes/Et<sub>2</sub>O) delivered 683 mg of the desired compound (65%) as a clear oil.

*R<sub>f</sub>*: 0.66 (4:1 hexanes/EtOAc)

<sup>1</sup>H NMR (600 MHz, CDCl<sub>3</sub>) δ 5.27 (qt, *J* = 6.7, 1.3 Hz, 1H), 3.38 (t, *J* = 5.9 Hz, 4H), 2.16 (dt, *J* = 47.2, 6.0 Hz, 4H), 1.59 (dt, *J* = 6.7, 1.0 Hz, 3H), 1.46 (s, 9H).

<sup>13</sup>C NMR (151 MHz, CDCl<sub>3</sub>) δ 155.01, 135.63, 118.02, 79.52, 35.94, 28.62, 28.00, 12.77.

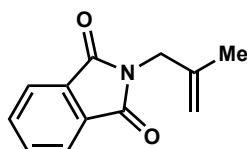

### 2-(2-methylallyl)isoindoline-1,3-dione

The title compound was synthesized following a known procedure,<sup>vii</sup> and the data matched those ones reported.

$^1\text{H NMR}$  (600 MHz,  $\text{CDCl}_3$ )  $\delta$  7.86 (dd,  $J = 5.4, 3.0$  Hz, 2H), 7.73 (dd,  $J = 5.5, 3.0$  Hz, 2H), 4.89 (p,  $J = 1.4$  Hz, 1H), 4.82 (p,  $J = 1.2$  Hz, 1H), 4.22 (s, 2H), 1.78 (d,  $J = 0.7$  Hz, 3H).

$^{13}\text{C NMR}$  (151 MHz,  $\text{CDCl}_3$ )  $\delta$  168.23, 134.15, 132.19, 123.50, 123.50, 112.13, 43.41, 20.54.

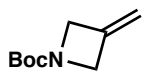

**tert-butyl 3-methyleneazetidine-1-carboxylate**

To a suspension of methyltriphenylphosphonium bromide in diethyl ether (1.4 g, 3.9 mmol), potassium *tert*-butoxide (3.9 mL, 1 M in THF, 3.9 mmol) was added dropwise, and the mixture was left stirring for 30 minutes at room temperature. Then, 1-Boc-3-azetidinone (513 mg, 3 mmol) was added dropwise as a 1 M solution in  $\text{Et}_2\text{O}$ . The reaction was left stirring for 16 hours, then quenched by addition of  $\text{H}_2\text{O}$  and extracted with diethyl ether (3X), dried over  $\text{Na}_2\text{SO}_4$  and rotoevaporated. Purification by FCC (hexanes then 9:1 hexanes: $\text{Et}_2\text{O}$ ) furnished the desired compound (411 mg, 80%) as a colorless oil.

$R_f$ : 0.56 (4:1 hexanes/ $\text{EtOAc}$ )

$^1\text{H NMR}$  (600 MHz,  $\text{CDCl}_3$ )  $\delta$  4.98 (p,  $J = 2.4$  Hz, 2H), 4.47 (t,  $J = 2.5$  Hz, 4H), 1.45 (s, 9H).

$^{13}\text{C NMR}$  (151 MHz,  $\text{CDCl}_3$ )  $\delta$  156.55, 137.92, 107.32, 79.76, 58.45 (broad singlet), 28.52.

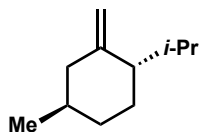

**(1S,4R)-1-isopropyl-4-methyl-2-methylenecyclohexane**

To a suspension of methyltriphenylphosphonium bromide in 20 mL of diethyl ether (3g, 8.45 mmol), potassium *tert*-butoxide (8.45 mL, 1 M in THF, 8.45 mmol) was added dropwise, and the mixture was left stirring for 30 minutes at room temperature. Then, (-)-menthone (1g, 6.5 mmol) was added dropwise as a 1 M solution in  $\text{Et}_2\text{O}$ . The reaction was left stirring until consumption of the starting material by TLC, then quenched by addition of  $\text{H}_2\text{O}$  and extracted with diethyl ether (3X), dried over  $\text{Na}_2\text{SO}_4$  and rotoevaporated. Purification by FCC (hexanes) furnished the desired compound (550 mg, 56%) as a colorless oil.

$R_f$ : 0.86 (hexanes)

$^1\text{H NMR}$  (600 MHz,  $\text{CDCl}_3$ )  $\delta$  4.70 (d,  $J = 1.2$  Hz, 1H), 4.58 (bs, 1H), 2.28 (dd,  $J = 12.4, 3.8$  Hz, 1H), 2.02 – 1.92 (m,  $J = 6.7$  Hz, 1H), 1.77 (qdd,  $J = 8.6, 3.6, 2.4$  Hz, 1H), 1.69 – 1.63 (m, 1H), 1.63 – 1.49 (m, 1H), 1.34 – 1.22 (m, 2H), 1.21 – 1.12 (m, 1H), 1.12 – 1.01 (m, 1H), 0.94 – 0.86 (m, 9H).

$^{13}\text{C NMR}$  (151 MHz,  $\text{CDCl}_3$ )  $\delta$  151.34, 106.25, 49.53, 44.57, 34.16, 33.54, 27.53, 27.23, 22.26, 21.54, 19.15.

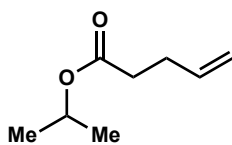

**isopropyl pent-4-enoate**

Synthesized from a modified procedure.<sup>viii</sup>

In a round-bottom flask, 4-pentenoic acid (401  $\mu$ L, 4 mmol), isopropanol (337  $\mu$ L, 4.4 mmol), EDC (843 mg, 4.4 mmol), and DMAP (525 mg, 4.3 mmol) were mixed together and stirred at room temperatures for 2 hours. To quench, the reaction was diluted with DCM, washed with H<sub>2</sub>O (1X), sat. NaHCO<sub>3</sub> (2X), 1N HCl (2X), and brine (1X). The organic layer was dried over MgSO<sub>4</sub>, filtered, and concentrated in vacuo to afford the desired ester as a clear oil (357 mg, 63%). The product was used without further purification.

<sup>1</sup>H NMR (600 MHz, CDCl<sub>3</sub>)  $\delta$  5.87 – 5.78 (m, 1H), 5.08 – 4.97 (m, 3H), 2.49 – 2.28 (m, 4H), 1.23 (d,  $J$  = 6.3 Hz, 6H).

<sup>13</sup>C NMR (151 MHz, CDCl<sub>3</sub>)  $\delta$  172.76, 136.93, 115.52, 67.73, 34.05, 29.12, 22.00.

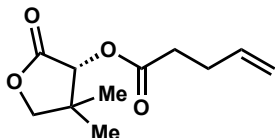

### **(R)-4,4-dimethyl-2-oxotetrahydrofuran-3-yl pent-4-enoate**

In a flame-dried round-bottom flask equipped with a Teflon-coated stir bar, 4-pentenoic acid (0.362 mL, 3.5 mmol, 1 equiv.), (*R*)-(-)-pantolactone (500 mg, 3.8 mmol, 1.07 equiv.), DMAP (476 mg, 3.9 mmol, 1.1 equiv.), EDC (762 mg, 3.9 mmol, 1.1 equiv.) were mixed in DCM (5 mL, 0.7 M) at room temperature for two hours. The reaction was quenched by diluting with DCM (15 mL), washing with H<sub>2</sub>O (10 mL), sat. aq. NaHCO<sub>3</sub> (2X 10 mL), 1 M HCl (2X 10 mL), and brine (10 mL). The organic layer was dried with MgSO<sub>4</sub> and concentrated under reduced pressure. The crude was purified by flash column chromatography (SiO<sub>2</sub>, 9:1 then 4:1 hexanes/EtOAc) delivered 650 mg (88%) of the title compound as a clear oil.

<sup>1</sup>H NMR (600 MHz, CDCl<sub>3</sub>)  $\delta$  5.84 (ddt,  $J$  = 16.7, 10.2, 6.4 Hz, 1H), 5.38 (s, 1H), 5.09 (dq,  $J$  = 17.1, 1.6 Hz, 1H), 5.04 (dq,  $J$  = 10.3, 1.4 Hz, 1H), 4.08 – 3.99 (m, 2H), 2.67 – 2.50 (m, 2H), 2.46 – 2.39 (m, 2H), 1.20 (s, 3H), 1.11 (s, 3H).

<sup>13</sup>C NMR (151 MHz, CDCl<sub>3</sub>)  $\delta$  172.51, 172.00, 136.29, 116.08, 76.32, 75.09, 40.34, 33.30, 28.86, 23.18, 20.08.

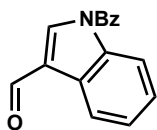

### **1-benzoyl-1H-indole-3-carbaldehyde**

The title compound was synthesized following a known procedure<sup>ix</sup> and the data matched those ones reported.

<sup>1</sup>H NMR (600 MHz, CDCl<sub>3</sub>)  $\delta$  10.06 (s, 1H), 8.38 – 8.27 (m, 2H), 7.95 (s, 1H), 7.81 – 7.74 (m, 2H), 7.74 – 7.66 (m, 1H), 7.60 (dd,  $J$  = 8.5, 7.1 Hz, 2H), 7.53 – 7.39 (m, 2H).

<sup>13</sup>C NMR (151 MHz, CDCl<sub>3</sub>)  $\delta$  185.79, 168.66, 137.67, 137.01, 133.21, 133.14, 129.60, 129.17, 126.75, 126.45, 125.74, 122.38, 122.21, 116.25.

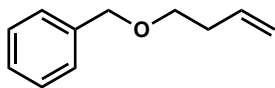

### **((but-3-en-1-yloxy)methyl)benzene**

To a suspension of NaH (290 mg, 7.3 mmol) in THF (20 mL) at 0 °C was added 3-buten-1-ol (480  $\mu$ L, 5.6 mmol) as a solution in THF (5 mL). After 1 hour, benzyl bromide was added (862  $\mu$ L, 7.3 mmol) and the reaction was left stirring overnight. The reaction was quenched by addition sat.  $\text{NH}_4\text{Cl}$ , extracted with EtOAc, dried over  $\text{MgSO}_4$ , and evaporated. The product was purified by flash column chromatography ( $\text{SiO}_2$ , 9:1 hexanes/ $\text{Et}_2\text{O}$ ) to yield 630 mg of the desired compound (69%) as a colorless oil.

$^1\text{H NMR}$  (600 MHz,  $\text{CDCl}_3$ )  $\delta$  7.35 (d,  $J = 4.5$  Hz, 4H), 7.29 (ddd,  $J = 8.8, 5.1, 3.8$  Hz, 1H), 5.86 (ddt,  $J = 17.0, 10.2, 6.8$  Hz, 1H), 5.12 (dq,  $J = 17.1, 1.7$  Hz, 1H), 5.06 (ddt,  $J = 10.3, 2.3, 1.2$  Hz, 1H), 4.53 (s, 2H), 3.54 (t,  $J = 6.7$  Hz, 2H), 2.39 (qt,  $J = 6.8, 1.4$  Hz, 2H).

$^{13}\text{C NMR}$  (151 MHz,  $\text{CDCl}_3$ )  $\delta$  138.61, 135.41, 128.50, 127.79, 127.68, 116.50, 73.04, 69.75, 34.38.

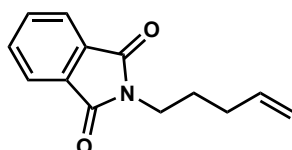

### **2-(pent-4-en-1-yl)isoindoline-1,3-dione**

The title compound was synthesized according to a known procedure and the data matched those ones reported.<sup>x</sup>

$^1\text{H NMR}$  (600 MHz,  $\text{CDCl}_3$ )  $\delta$  7.86 – 7.80 (m, 2H), 7.72 – 7.67 (m, 2H), 5.81 (ddt,  $J = 16.9, 10.2, 6.5$  Hz, 1H), 5.04 (dq,  $J = 17.2, 1.7$  Hz, 1H), 4.97 (dq,  $J = 10.2, 1.4$  Hz, 1H), 3.71 – 3.67 (m, 2H), 2.16 – 2.06 (m, 2H), 1.78 (p,  $J = 7.5$  Hz, 2H).

$^{13}\text{C NMR}$  (151 MHz,  $\text{CDCl}_3$ )  $\delta$  168.53, 137.44, 133.99, 132.29, 123.30, 115.42, 37.69, 31.11, 27.76.

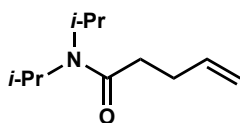

### **N,N-diisopropylpent-4-enamide**

In a flame-dried round-bottom flask equipped with a Teflon-coated stir bar, 4-pentenoic acid (0.350 mL, 3.5 mmol), diisopropylamine (0.525 mL, 3.75 mmol), DMAP (435 mg, 3.6 mmol), EDC (750 mg, 3.9 mmol) were mixed in DCM (5 mL, 0.7 M) at room temperature for two hours. The reaction was quenched by diluting with DCM (15 mL), washing with  $\text{H}_2\text{O}$  (10 mL), sat. aq.  $\text{NaHCO}_3$  (2X 10 mL), 1 M HCl (2X 10 mL), and brine (10 mL). The organic layer was dried with  $\text{MgSO}_4$  and concentrated under reduced pressure. Purification by flash column chromatography ( $\text{SiO}_2$ , 4:1 hexanes/ $\text{EtOAc}$ ) delivered 455 mg of the title compound (71%) as a clear oil.

Spectra matched those ones reported previously.<sup>xi</sup>

$^1\text{H NMR}$  (600 MHz,  $\text{CDCl}_3$ )  $\delta$  5.92 – 5.83 (m, 1H), 5.08 – 5.02 (m, 1H), 5.00 – 4.96 (m, 1H), 3.97 (p,  $J = 7.1, 6.0$  Hz, 1H), 3.66 – 3.32 (m, 1H), 2.37 (d,  $J = 2.6$  Hz, 4H), 1.37 (d,  $J = 6.8$  Hz, 6H), 1.20 (d,  $J = 6.7$  Hz, 6H).

$^{13}\text{C NMR}$  (151 MHz,  $\text{CDCl}_3$ )  $\delta$  171.20, 138.08, 115.03, 48.38, 45.74, 34.64, 29.63, 21.19, 20.86.

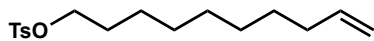

#### dec-9-en-1-yl 4-methylbenzenesulfonate

To a solution of 9-decen-1-ol (892  $\mu$ L, 5 mmol) in DCM (18 mL, 0.3 M) at 0 °C was added triethylamine (1.2 mL, 8 mmol), 4-dimethylaminopyridine (61 mg, 0.5 mmol), and tosyl chloride (1.14 g, 6 mmol). The reaction was brought to room temperature and left stirring for 1 hour. Then it was quenched by the slow addition of aqueous  $\text{NH}_4\text{Cl}$ , extracted with EtOAc, dried over  $\text{MgSO}_4$ , and rotoevaporated. Purification by flash column chromatography ( $\text{SiO}_2$ , 9:1 hexanes/ $\text{Et}_2\text{O}$ ) delivered 770 mg of the title compound (50%) as a white solid.

$^1\text{H NMR}$  (600 MHz,  $\text{CDCl}_3$ )  $\delta$  7.83 – 7.77 (m, 2H), 7.37 – 7.31 (m, 2H), 5.80 (ddt,  $J = 16.9, 10.2, 6.7$  Hz, 1H), 4.99 (dq,  $J = 17.1, 1.7$  Hz, 1H), 4.93 (ddt,  $J = 10.2, 2.4, 1.2$  Hz, 1H), 4.02 (t,  $J = 6.6$  Hz, 2H), 2.45 (s, 3H), 2.07 – 1.98 (m, 2H), 1.67 – 1.58 (m, 2H), 1.55 (s, 2H), 1.41 – 1.17 (m, 10H).

$^{13}\text{C NMR}$  (151 MHz,  $\text{CDCl}_3$ )  $\delta$  144.75, 139.25, 133.42, 129.94, 128.04, 114.35, 70.82, 33.89, 29.35, 29.08, 29.01, 28.98, 28.95, 25.45, 21.78.

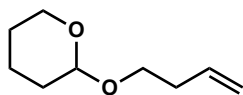

#### 2-(but-3-en-1-yloxy)tetrahydro-2H-pyran

The title compound was synthesized according to a known procedure<sup>xii</sup> and the data matched those ones reported.

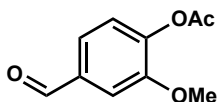

#### 4-formyl-2-methoxyphenyl acetate

The title compound was synthesized according to a known procedure<sup>xiii</sup> and the data matched those ones reported.



## E. Optimization of the Imine Coupling

Initially we explored the use of Ellman's *tert*-butyl sulfonamide given its reported use in the synthesis of chiral amines by trapping of alkyl radicals generated from alkyl halides.<sup>xiv</sup> However, these sulfonimides led to poor yields and side products that were consistent with extrusion of a *tert*-butyl radical via formation of an iminosulfanone (radical migration has also been observed before<sup>xv</sup>). Although the yield of the desired coupled product could be improved by increasing the metal loading (Figure S1), we decided to explore aryl-sulfinyl derivatives similar to Davis' tolyl sulfonamide as we imagined that formation of an sp<sup>2</sup> radical should be unfavorable.

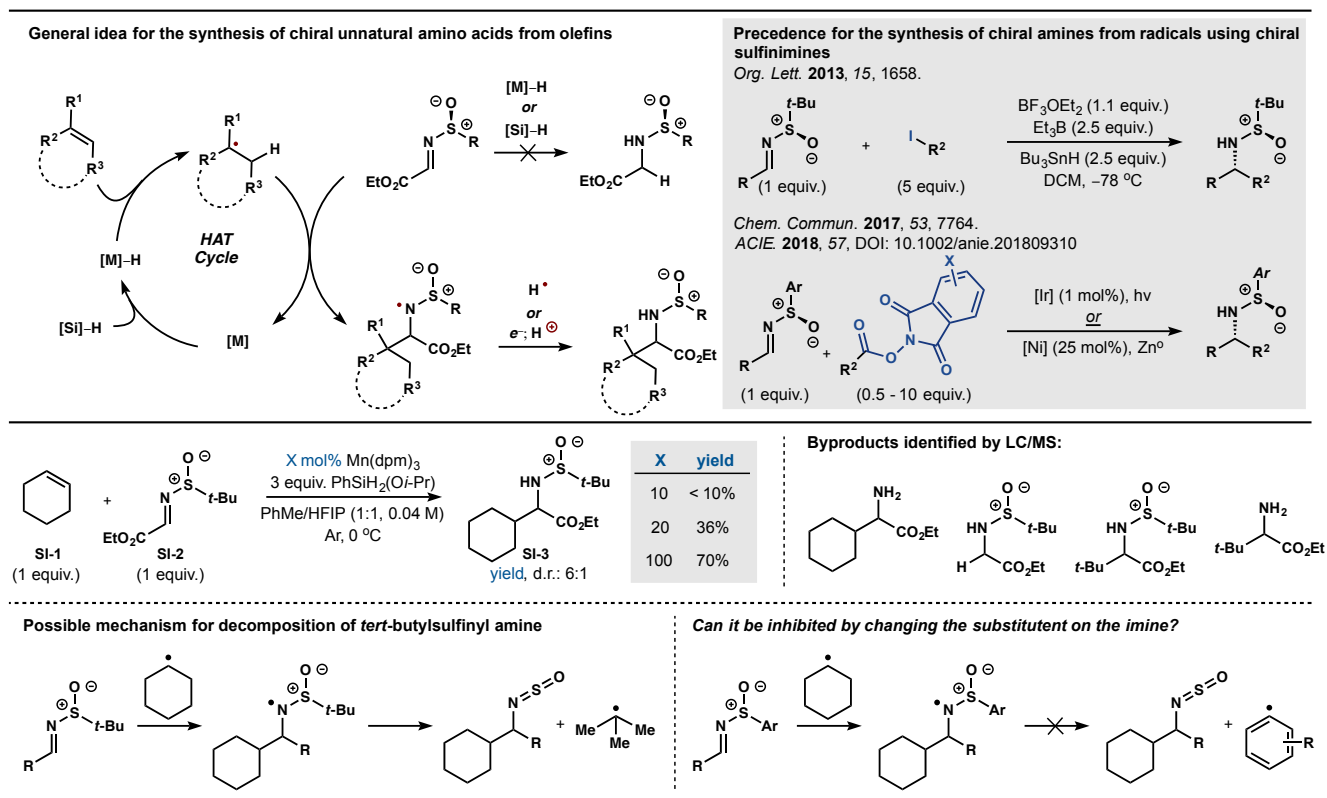

**Figure S1:** Combining MHAT with a chiral imine.

Exploration of different MHAT complexes suggested [Fe] and [Mn]  $\beta$ -diketonates pre-catalyst afforded the best yields, with Fe(acac)<sub>3</sub> behaving better than manganese because of decreased amount of imine reduction (note that the yield with [Mn] could be increased by using an excess of the olefin and TBHP as an additive (Table S1, Entry 17). The diastereoselectivity could be improved by use of more hindered imine with the more hindered triisopropyl phenyl and mesitylene imine affording d.r.'s higher than 20:1, but changing the ligand sphere of the metal, the temperature of the reaction, or the silane used did not have a major improvement (cryogenic temperatures were not compatible with this variation of HAT). Although the use of 10% of iron is not prohibitively expensive, only 5% could be used without a major decrease in yield. Informative variations are given below:

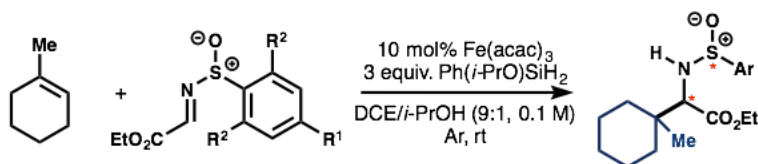

| Entry | Conditions                                                                                                               | R <sup>1</sup> (R <sup>2</sup> ) | Yield (amine) <sup>a</sup> | d.r. <sup>a</sup> |
|-------|--------------------------------------------------------------------------------------------------------------------------|----------------------------------|----------------------------|-------------------|
| 1     | Same                                                                                                                     | Me (H)                           | 77% <sup>b</sup>           | 5:1               |
| 2     | Same                                                                                                                     | Me (Me)                          | 56% <sup>b</sup>           | > 20:1            |
| 3     | no <i>i</i> -PrOH                                                                                                        | Me (H)                           | 55%                        | 5:1               |
| 4     | EtOH instead of <i>i</i> -PrOH                                                                                           | Me (H)                           | 74%                        | 5:1               |
| 5     | MeOH instead of <i>i</i> -PrOH                                                                                           | Me (H)                           | 61%                        | 5:1               |
| 6     | <i>t</i> -BuOH instead of <i>i</i> -PrOH                                                                                 | Me (H)                           | 42%                        | 5:1               |
| 7     | DCM instead of DCE                                                                                                       | Me (H)                           | 61%                        | 7:1               |
| 8     | EtOAc instead of DCE                                                                                                     | Me (H)                           | 62%                        | 6:1               |
| 9     | Hexanes instead of DCE                                                                                                   | Me (H)                           | 60%                        | 5:1               |
| 10    | PhMe instead of DCE                                                                                                      | Me (H)                           | 53%                        | 6:1               |
| 11    | PhH instead of DCE                                                                                                       | Me (H)                           | 56%                        | 6:1               |
| 12    | PhCF <sub>3</sub> instead of DCE                                                                                         | Me (H)                           | 63%                        | 6:1               |
| 13    | HFIP instead of DCE                                                                                                      | Me (H)                           | 44%                        | 4:1               |
| 14    | THF instead of DCE                                                                                                       | Me (H)                           | 52%                        | 6:1               |
| 15    | Only <i>i</i> -PrOH                                                                                                      | Me (H)                           | 63%                        | 5:1               |
| 16    | Mn(dpm) <sub>3</sub> instead of Fe(acac) <sub>3</sub>                                                                    | <i>i</i> -Pr ( <i>i</i> -Pr)     | 35%                        | > 20:1            |
| 17    | Mn(dpm) <sub>3</sub> (0.2 equiv.) instead of Fe(acac) <sub>3</sub><br>and 5 equiv. of olefin <sup>c</sup>                | <i>i</i> -Pr ( <i>i</i> -Pr)     | 73%                        | > 20:1            |
| 18    | Co(acac) <sub>2</sub> , Co(dpm) <sub>2</sub> , Co(salen)Cl, or Co(acac) <sub>3</sub> instead<br>of Fe(acac) <sub>3</sub> | Me (H)                           | traces                     | ND                |
| 19    | Fe(dpm) <sub>3</sub> instead of Fe(acac) <sub>3</sub>                                                                    | Me (H)                           | 72%                        | 5:1               |
| 20    | PhSiH <sub>3</sub> instead of Ph( <i>i</i> -PrO)SiH <sub>2</sub>                                                         | Me (H)                           | 27%                        | 5:1               |
| 21    | 0 °C instead of rt                                                                                                       | Me (H)                           | 52%                        | 5:1               |
| 22    | Fe(acac) <sub>3</sub> (5 mol%)                                                                                           | Me (H)                           | 69%                        | 5:1               |

- a) Yield and diastereocontrol determined by <sup>1</sup>H-NMR of the crude mixture using trimethoxybenzene as the internal standard. b) Isolated yield. c) Using PhMe as the solvent and 1 equiv. of TBHP as an additive.

## F. Determination of Stereochemistry

Imines containing chiral sulfinyl auxiliaries are known to be engaged by nucleophiles both in closed and in opened transition states; normally open transition states tend to transfer the absolute stereochemistry of the sulfinimine to the amine (i.e. (*R*)-sulfinimine to (*R*)-amine) whereas closed transition states tend to afford the opposite one ((*R*)-sulfinimine to (*S*)-amine).<sup>xvi</sup> To determine which stereochemistry was being productive in our case, we performed the reaction using isobutene as the olefin to build *tert*-butyl glycine derivatives **3** and **4**. These substrates could then be transformed into either the tosyl-derivative (**SI-9**) or the free amine (**SI-10**) and be compared to those same substrates derived from a commercially available enantiopure sample of *tert*-butyl glycine. It was determined that **SI-9** had an optical rotation of +38.37 (Figure S2, B). When we compared it **SI-9** derived from our reaction using the tolyl-derived sulfinimine **SI-4**, we found that the optical rotation of this sample also had a positive sign (+24.4), suggesting that it also had an (*S*)-configuration. Since we started with the (*S*)-sulfinimine, it appears as if the chirality is transferred to the amine. Using a similar approach, we

determined that the reaction with the (*R*)-enantiomer of the mesitylene imine-derivative gave the (*R*)-product. By analogy, we determined the stereochemistry of the rest of the substrates to be either (*R*) at the amine carbon for the substrates that reacted with the (*R*)-mesitylene imine **SI-5**, or (*S*) for those ones that reacted with the (*S*)-tolyl imine **SI-4**.

a. What enantiomer is being formed from the chiral auxiliaries used?

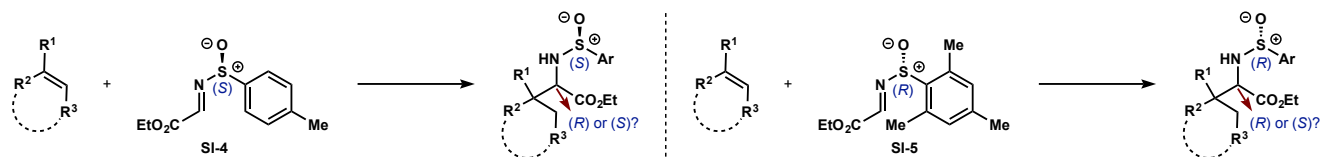

b. Derivatization of (*L*)-*tert*-leucine

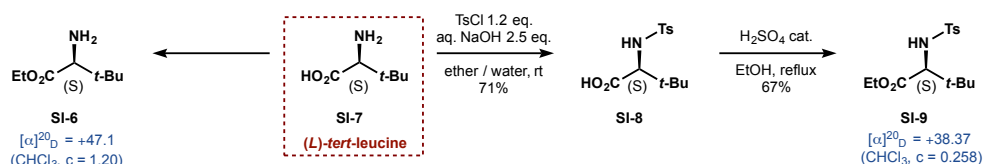

c. Derivatization of compounds **3** and **4** and determination of stereochemistry

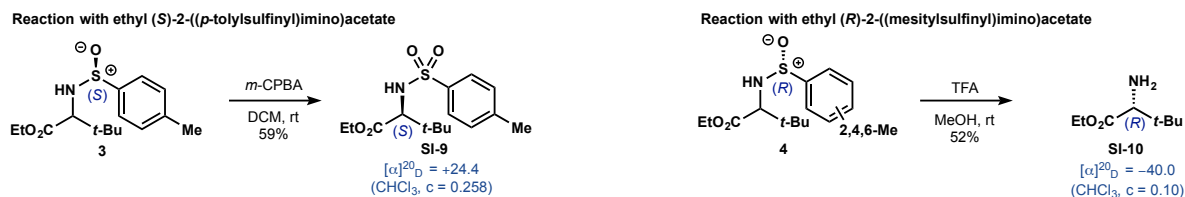

**Figure S2:** Determination of the stereochemistry imparted by the chiral auxiliary.

## G. General procedures

- I. **(Imine-Olefin coupling)** To a flame-dried reaction vial equipped with a Teflon-coated stir bar was added the imine (1 equiv.),  $\text{Fe}(\text{acac})_3$  (0.1 equiv.), and the olefin (1.2–2 equiv.) if this one was a solid. The solids were purged with argon for 15 minutes. Then, dichloroethane (0.1 M) and *i*-PrOH or EtOH (10 equiv.) were added, followed by the olefin if it was not added at the beginning. The reaction was stirred until dissolution of the solids, at which time  $\text{PhSiH}_2(\text{O}i\text{-Pr})$  (3 equiv.) was added in one portion. The reaction was monitored by TLC or LCMS and upon consumption of the imine (1–16 hours), it was quenched by addition of 1 volume of isopropanol followed by aqueous saturated EDTA. The reaction was stirred until the orange color disappeared and a white slurry was formed. This slurry was extracted with EtOAc (3X), the organic layers were dried over  $\text{MgSO}_4$  and concentrated under reduced pressure. The semi-crude mixture was analyzed by NMR to determine diastereoselectivity and purified by flash column chromatography.

### Notes and Troubleshooting (Part 1):

- 1) To increase the yield the best approach seems to be increasing the equivalents of olefin used. Increasing the amount of the imine is detrimental (it appears to coordinate to the catalyst) and increasing the amount of catalyst increases reduction of the imine to the amine.
- 2) Although DCE was used as the solvent for exploration of the scope, other solvents are also competent (See **Table S1** for more information).
- 3) Purifying the imine before using it is good for consistent high yields.
- 4) We observed racemization of some substrates if they were sitting at room temperature for extended periods of time (Substrate **6**, for instance, racemized to an almost 1:1 mixture of diastereomers over the course of one week at room temperature). This process did not seem to occur if it was stored at  $-20^\circ\text{C}$ .

This racemization is something that should be kept in mind when storing the unnatural amino acids derivatives.

- II. (Aldehyde-Olefin coupling - CrCl<sub>3</sub> anhydrous, terminal olefins)** To a flame-dried vial equipped with a Teflon-coated stir bar Co(salen) (0.1 equiv.), 1-fluoro-2,4,6-trimethyl pyridinium tetrafluoroborate (0.1 equiv.), CrCl<sub>3</sub> (1 equiv.), were added (the olefin, 1 equiv., was also added at this point if it was a solid). The solids were vented with an argon balloon and an open needle for 15 minutes. Then, THF (0.2 M) and CH<sub>3</sub>CN (1 M) were added, followed by the olefin if it was not added at the beginning (1 equiv.), PhSiH<sub>3</sub> (2 equiv.), and the aldehyde (1 – 2 equiv.) (Note: the reactions were placed in a water bath prior addition of the silane since this step is exothermic and doing so seemed to help in obtaining consistent yields). The reaction was stirred at a speed of at least 900 rpm for 24 h taking care of bringing the [Cr] back into the solvent if this one was accumulating at the sides of the vial. The reaction was quenched by addition of 1 volume 10% citric acid, followed by 1 volume 10% Na<sub>2</sub>SO<sub>4</sub>/ 5% NaHCO<sub>3</sub>, extracted with EtOAc (3X), dried with Na<sub>2</sub>SO<sub>4</sub> or MgSO<sub>4</sub>, evaporated under reduced pressure, and purified by flash column chromatography.
- III. (Aldehyde-Olefin coupling - CrCl<sub>3</sub> anhydrous, internal olefins)** To a flame-dried vial equipped with a Teflon-coated stir bar was added Co(salen) (0.1 equiv.), 1-fluoro-2,4,6-trimethyl pyridinium tetrafluoroborate (0.1 equiv.), CrCl<sub>3</sub> (1 equiv.) and the olefin if it was a solid (1 equiv.). The solids were vented with an argon balloon and an open needle for 15 minutes. Then, DME (0.2 M) was added, followed by the olefin if that was not added at the beginning (1 equiv.). The reaction was placed in a water bath and PhSiH<sub>3</sub> (2 equiv.) was added, followed by the aldehyde (2 equiv.). The reaction was stirred at a speed of at least 900 rpm for 48 h taking care of bringing the Cr back into the solvent if this one was accumulating at the sides of the vial. The reaction was quenched by addition of 1 volume 10% citric acid, followed by 1 volume 10% Na<sub>2</sub>SO<sub>4</sub>/ 5% NaHCO<sub>3</sub>, extracted with EtOAc (3X), dried with Na<sub>2</sub>SO<sub>4</sub> or MgSO<sub>4</sub>, concentrated under reduced pressure, and purified by flash column chromatography.
- IV. (Aldehyde-Olefin coupling - CrCl<sub>3</sub>(THF)<sub>3</sub>, terminal olefins)** To a flame-dried reaction vial equipped with a Teflon-coated stir bar was added Co(salen) (0.2 equiv.) and 1-fluoro-2,4,6-trimethyl pyridinium tetrafluoroborate (0.2 equiv.). The solids were vented with an argon balloon and an open needle for 15 minutes. In the meantime, CrCl<sub>3</sub>(THF)<sub>3</sub> was weighted out under in inert atmosphere using an oven-dried vial. It was dissolved in CH<sub>3</sub>CN to obtain a 1 M solution by sonication (*only a little of sonication is required: too much sonication will turn the solution into a paste*). After degassing, THF (2 M) was added into the vial with Co(salen) and oxidant, followed by the olefin (2 equiv.), the silane (2 equiv.), and the aldehyde (2 equiv.) (Note: the reactions were placed in a water bath prior addition of the silane). 1 equiv. of the 1 M solution of [Cr] was added last. The reaction was stirred for 24 h, before being quenched by addition of 1 volume 10% citric acid, followed by 1 volume 10% Na<sub>2</sub>SO<sub>4</sub>/ 5% NaHCO<sub>3</sub>, extracted with EtOAc (3X), dried with Na<sub>2</sub>SO<sub>4</sub> or MgSO<sub>4</sub>, concentrated under reduced pressure, and purified by flash column chromatography.

#### Notes and Troubleshooting (Part 2):

- 5) For the General Procedure **II** and **III**, the CrCl<sub>3</sub> does not dissolve in the reaction mixture at the beginning but dissolves over time. Consequently, although the reactions are heterogenous at the beginning, they are homogeneous towards the end (when using THF as the solvent the reactions have minimal viscosity, but with DME the reactions tend to form a more viscous liquid). Given the heterogeneous nature and the rapid stirring required, the [Cr] can start accumulating on the walls of the vials. It is important to make sure to bring this accumulated [Cr] back into solution in order to get good yields. We normally did it just by tilting the vial and washing the [Cr] down with the reaction mixture.
- 6) Rapid stirring is necessary for the heterogenous reactions in order to help the [Cr] dissolve. Sonication did not seem to help.
- 7) The use of CH<sub>3</sub>CN as a cosolvent seems to be necessary for higher yields, and qualitatively it seemed to have an effect in the dissolution of the [Cr]. It is important to note, however, that the reaction does not

work in CH<sub>3</sub>CN alone, and higher ratios of CH<sub>3</sub>CN/THF seemed to be detrimental. We also noticed that in the case of the reactions that use CrCl<sub>3</sub> anhydrous (procedure II) the CH<sub>3</sub>CN needed to be added last. HFIP can also be used as a co-solvent for the reactions with CrCl<sub>3</sub> anhydrous but not with those with CrCl<sub>3</sub>(THF)<sub>3</sub>. None of these co-solvents help with internal olefins.

- 8) For the General Procedure IV, it is important to add this [Cr] after the HAT cycle has started, otherwise only SM is recovered at the end of the reaction.
- 9) CrCl<sub>3</sub>(THF)<sub>3</sub> is very hygroscopic and handling under an inert atmosphere is recommended.
- 10) The presence of acid is detrimental to the reaction. As a result, it is very important to purify the aldehydes since they may contain carboxylic acid impurities.
- 11) Presence of water is also detrimental (See Table 1 in the manuscript), and as a consequence we have noticed that the yield seemed to decrease if a) CrCl<sub>3</sub> that was not kept anhydrous was used, b) old batches of Co(salen) that were kept exposed to air were used, c) in general not having good technique to exclude moisture.
- 12) In terms of yield, both CrCl<sub>3</sub> and CrCl<sub>3</sub>(THF)<sub>3</sub> work well with terminal olefins, with the advantage that CrCl<sub>3</sub>(THF)<sub>3</sub> is soluble in the reaction system, so rapid stirring is not required. However, this form of [Cr] is also more expensive. CrCl<sub>3</sub>(THF)<sub>3</sub> cannot be used for internal olefins.

#### H. Characterization of unnatural amino acids derivatives (only data for the major diastereomer is given)

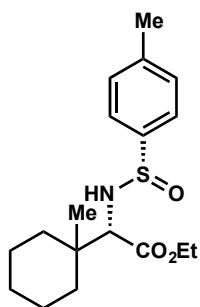

##### ethyl (S)-2-(1-methylcyclohexyl)-2-(((S)-p-tolylsulfinyl)amino)acetate (1)

The General Procedure I was followed on a 0.1 mmol scale using 1.5 equiv. of 1-methyl-1-cyclohexene as the olefin (18  $\mu$ L, 0.15 mmol), ethyl (S)-2-((p-tolylsulfinyl)imino)acetate as the imine (24 mg, 0.1 mmol), and EtOH as the cosolvent instead of *i*-PrOH. Purification by flash column chromatography (SiO<sub>2</sub>, 7:3 hexanes/EtOAc) delivered 26 mg of the desired compound (77%) as a clear oil and a 8:1 mixture of diastereomers. Crude d.r. was determined to be 5:1 by integration of the  $\alpha$ -methyl group by <sup>1</sup>H NMR.

*R*<sub>f</sub>: 0.12 (4:1 hexanes/EtOAc)

<sup>1</sup>H NMR (600 MHz, CDCl<sub>3</sub>)  $\delta$  7.59 (d, *J* = 8.2 Hz, 2H), 7.30 (d, *J* = 7.7 Hz, 2H), 4.61 (d, *J* = 9.8 Hz, 1H), 4.18 – 4.01 (m, 2H), 3.82 (d, *J* = 9.8 Hz, 1H), 2.41 (s, 3H), 1.66 – 1.53 (m, 3H), 1.51 – 1.37 (m, 6H), 1.36 – 1.29 (m, 1H), 1.23 (t, *J* = 7.2 Hz, 3H), 0.90 (s, 3H).

<sup>13</sup>C NMR (151 MHz, CDCl<sub>3</sub>)  $\delta$  172.59, 142.26, 141.66, 129.68, 125.55, 61.18, 37.64, 34.96, 34.85, 26.11, 21.73, 21.69, 21.51, 14.24.

HRMS: *m/z* (ESI): Calcd. for C<sub>18</sub>H<sub>27</sub>NO<sub>3</sub>S [M+H]: 338.1790, found: 338.1791.

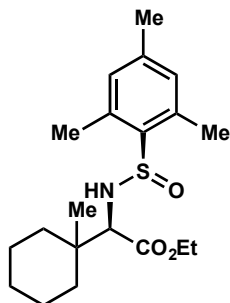

**ethyl (*R*)-2-(((*R*)-mesitylsulfinyl)amino)-2-(1-methylcyclohexyl)acetate (**2**)**

The General Procedure **I** was followed on a 0.2 mmol scale using 1.5 equiv. of 1-methyl-1-cyclohexene as the olefin (36  $\mu$ L, 0.3 mmol), ethyl (*R*)-2-((mesitylsulfinyl)imino)acetate as the imine (53 mg, 0.2 mmol), and *i*-PrOH as the cosolvent. Purification by flash column chromatography (SiO<sub>2</sub>, 4:1 hexanes/EtOAc) delivered 41 mg of the desired compound (56%) as a clear oil and a single diastereomer. Crude d.r. appears to be only one diastereomer.

*R<sub>f</sub>*: 0.34 (4:1 hexanes/EtOAc)

<sup>1</sup>H NMR (600 MHz, CDCl<sub>3</sub>)  $\delta$  6.87 (s, 2H), 5.01 (d, *J* = 10.1 Hz, 1H), 4.32 – 4.12 (m, 2H), 3.83 (d, *J* = 10.1 Hz, 1H), 2.57 (s, 6H), 2.29 (s, 3H), 1.61 (dt, *J* = 13.7, 4.2 Hz, 2H), 1.53 (ddd, *J* = 12.6, 8.9, 3.7 Hz, 1H), 1.45 (tt, *J* = 12.0, 9.0, 4.8 Hz, 3H), 1.38 – 1.32 (m, 2H), 1.30 (t, *J* = 7.1 Hz, 3H), 1.28 – 1.23 (m, 2H), 0.85 (s, 3H).

<sup>13</sup>C NMR (151 MHz, CDCl<sub>3</sub>)  $\delta$  172.89, 140.97, 138.28, 136.87, 130.91, 61.37, 37.73, 34.95, 34.89, 26.07, 21.69, 21.66, 21.18, 19.44, 14.31.

HRMS: *m/z* (ESI): Calcd. for C<sub>20</sub>H<sub>31</sub>NO<sub>3</sub>S [M+H]: 366.2103, found: 366.2100.

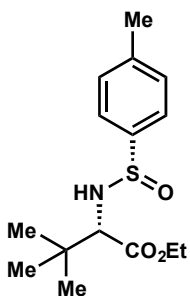

**ethyl (*S*)-3,3-dimethyl-2-(((*S*)-*p*-tolylsulfinyl)amino)butanoate (**3**)**

The general procedure **I** was followed on a 0.4 mmol scale using ethyl (*S*)-2-((*p*-tolylsulfinyl)imino)acetate as the imine (95.6 mg, 0.4 mmol) with the following modifications:

- The atmosphere was replaced with an atmosphere of isobutene using a balloon using the following procedure: once the solvents were added (DCE and *i*-PrOH), isobutene was bubbled inside the solution for around 10 seconds. Then the silane was added, and the reaction was left to stir for 16 hours under an atmosphere of isobutene.

Purification of the crude mixture by flash column chromatography (SiO<sub>2</sub>, 10:1 to 3:1 hexanes/EtOAc) delivered 64 mg of the title compound (54%) as a colorless oil and a 5:1 mixture of diastereomers.

*R<sub>f</sub>*: 0.16 (4:1 hexanes/EtOAc)

<sup>1</sup>H NMR (600 MHz, CDCl<sub>3</sub>)  $\delta$  7.60 (d, *J* = 8.2 Hz, 2H), 7.31 (d, *J* = 8.0 Hz, 2H), 4.69 (d, *J* = 9.7 Hz, 1H), 4.18 – 4.05 (m, 2H), 3.64 (d, *J* = 9.7 Hz, 1H), 2.42 (s, 3H), 1.24 (t, *J* = 7.2 Hz, 3H), 1.06 – 0.94 (m, 9H).

$^{13}\text{C}$  NMR (151 MHz,  $\text{CDCl}_3$ )  $\delta$  172.40, 142.00, 141.54, 129.54, 125.41, 65.00, 61.08, 34.85, 26.49, 21.36, 14.09.

HRMS:  $m/z$  (ESI): Calcd. for  $\text{C}_{15}\text{H}_{23}\text{NO}_3\text{S}$  [ $\text{M}^+ \text{H}$ ]: 298.1477; found: 298.1472.

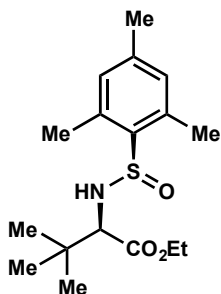

**ethyl (*R*)-2-(((*R*)-mesitylsulfinyl)amino)-3,3-dimethylbutanoate (4)**

The general procedure I was followed on a 0.2 mmol scale using ethyl (*R*)-2-((mesitylsulfinyl)imino)acetate as the imine (53 mg, 0.2 mmol), with the following modifications:

- The atmosphere was replaced with an atmosphere of isobutene using a balloon using the following procedure: once the solvents were added (DCE and EtOH instead of *i*-PrOH), isobutene was bubbled inside the solution for around 10 seconds. Then the silane was added as normal, and the reaction was left running for 16 hours under an atmosphere of isobutene.

Purification of the crude mixture by flash column chromatography ( $\text{SiO}_2$ , 9:1 hexanes/EtOAc) delivered 57 mg of the title compound (88%) as a colorless oil and a single diastereomer.

$R_f$ : 0.36 (4:1 hexanes/EtOAc)

$^1\text{H}$  NMR (500 MHz,  $\text{CDCl}_3$ )  $\delta$  6.90 (s, 2H), 5.08 (d,  $J = 10.0$  Hz, 1H), 4.35 – 4.16 (m, 2H), 3.63 (d,  $J = 10.0$  Hz, 1H), 2.60 (s, 6H), 2.32 (s, 3H), 1.33 (t,  $J = 7.2$  Hz, 3H), 0.99 (s, 9H).

$^{13}\text{C}$  NMR (126 MHz,  $\text{CDCl}_3$ )  $\delta$  172.70, 140.87, 138.06, 136.76, 130.80, 66.49, 61.30, 35.00, 26.47, 21.04, 19.31, 14.17.

HRMS:  $m/z$  (ESI): Calcd. for  $\text{C}_{17}\text{H}_{27}\text{NO}_3\text{S}$  [ $\text{M}^+ \text{H}$ ]: 326.1790; found: 326.1788.

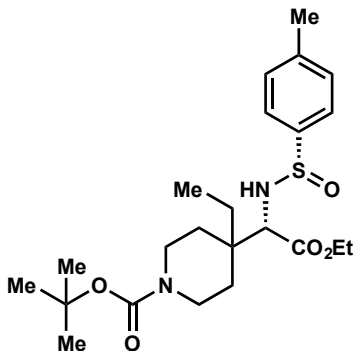

**tert-butyl 4-(((*S*)-2-ethoxy-2-oxo-1-(((*S*)-*p*-tolylsulfinyl)amino)ethyl)-4-ethylpiperidine-1-carboxylate (5)**

The General Procedure I was followed on a 0.1 mmol scale using 1.5 equiv. of *tert*-butyl 4-ethylidenepiperidine-1-carboxylate as the olefin (32 mg, 0.15 mmol), ethyl (*S*)-2-((*p*-tolylsulfinyl)imino)acetate as the imine (24 mg, 0.1 mmol), and EtOH as the cosolvent. Purification by PTLC (1:1 hexanes/EtOAc) delivered 19 mg of the desired compound (42%) as a clear oil and a 7:1 mixture of diastereomers. Crude d.r. was 6:1 by the *tert*butyl group.

*R<sub>f</sub>*: 0.17 (7:3 hexanes/EtOAc)

<sup>1</sup>H NMR (600 MHz, CDCl<sub>3</sub>) δ 7.57 (d, *J* = 8.2 Hz, 2H), 7.30 (d, *J* = 7.7 Hz, 2H), 4.62 (d, *J* = 9.9 Hz, 1H), 4.19 – 4.05 (m, 2H), 3.96 (d, *J* = 9.9 Hz, 1H), 3.68 (dt, *J* = 13.6, 5.0 Hz, 2H), 3.27 – 3.08 (m, 2H), 2.41 (s, 3H), 1.72 – 1.54 (m, 4H), 1.55 – 1.47 (m, 2H), 1.45 (s, 9H), 1.24 (t, *J* = 7.1 Hz, 3H), 0.88 (t, *J* = 7.5 Hz, 3H).

<sup>13</sup>C NMR (151 MHz, CDCl<sub>3</sub>) δ 172.32, 155.13, 141.92, 129.78, 125.39, 79.65, 61.59, 60.82, 39.70 (broad singlet), 38.91, 30.11 (broad singlet), 28.59, 24.23 (broad singlet), 21.53, 14.19, 7.57. Boc-carbonyl cannot be seen due to signal broadening.

HRMS: *m/z* (ESI): Calcd. For C<sub>23</sub>H<sub>36</sub>N<sub>2</sub>O<sub>5</sub>S [M+H]: 453.2423, found: 453.2418.

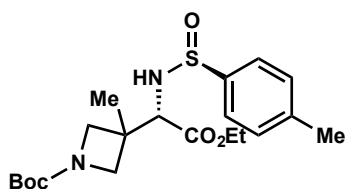

***tert*-butyl 3-((*S*)-2-ethoxy-2-oxo-1-(((*S*)-*p*-tolylsulfinyl)amino)ethyl)-3-methylazetidine-1-carboxylate (6)**

The General Procedure I was followed on a 0.1 mmol scale using 1.5 equiv. of *tert*-butyl 3-methyleneazetidine-1-carboxylate as the olefin (25 mg, 0.15 mmol), ethyl (*S*)-2-((*p*-tolylsulfinyl)imino)acetate as the imine (24 mg, 0.1 mmol), and EtOH as the cosolvent instead of *i*-PrOH. Purification by flash column chromatography (SiO<sub>2</sub>, 4:1 then 3:2 hexanes/EtOAc) delivered 24 mg of the desired compound (58%) as a white solid and a 5:1 mixture of diastereomers. Note: This compound epimerizes at room temperature over a period of approximately 1 month as a pure compound, and 1 week as a crude.

*R<sub>f</sub>*: 0.16 (7:3 hexanes/EtOAc)

<sup>1</sup>H NMR (600 MHz, CDCl<sub>3</sub>) δ 7.56 (d, *J* = 8.3 Hz, 2H), 7.33 – 7.29 (m, 2H), 4.81 (d, *J* = 8.6 Hz, 1H), 4.30 – 4.12 (m, 2H), 4.09 (t, *J* = 8.8 Hz, 2H), 4.03 (d, *J* = 8.9 Hz, 1H), 3.55 (dd, *J* = 8.8, 1.4 Hz, 2H), 2.41 (s, 3H), 1.45 (s, 9H), 1.20 (m, 6H).

<sup>13</sup>C NMR (151 MHz, CDCl<sub>3</sub>) δ 171.02, 156.54, 142.03, 129.81, 125.55, 79.85, 62.04, 37.18, 28.53, 28.44, 21.52, 20.90, 14.24. Boc-carbonyl cannot be seen due to signal broadening.

HRMS: *m/z* (ESI): Calcd. for C<sub>20</sub>H<sub>30</sub>N<sub>2</sub>O<sub>5</sub>S [M+ Na]: 433.1773; found: 433.1768.

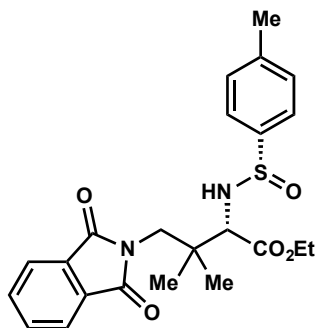

**ethyl (*S*)-4-(1,3-dioxisoindolin-2-yl)-3,3-dimethyl-2-(((*S*)-*p*-tolylsulfinyl)amino)butanoate (7)**



The General Procedure I was followed on a 0.1 mmol scale using 1.5 equiv. of 2-(2-methylallyl)isoindoline-1,3-dione as the olefin (30 mg, 0.15 mmol), ethyl (*S*)-2-((*p*-tolylsulfinyl)imino)acetate as the imine (24 mg, 0.1 mmol), and EtOH as the cosolvent. Purification by flash column chromatography (7:3 hexanes/EtOAc) delivered 22 mg of the desired compound (49%) as a clear oil and a 6:1 mixture of diastereomers. Crude d.r. was determined to be 5:1.

*R<sub>f</sub>*: 0.27 (7:3 hexanes/EtOAc)

<sup>1</sup>H NMR (600 MHz, CDCl<sub>3</sub>) δ 7.89 – 7.84 (m, 2H), 7.76 – 7.72 (m, 2H), 7.68 (d, *J* = 8.1 Hz, 2H), 7.31 (d, *J* = 7.8 Hz, 2H), 4.90 (d, *J* = 10.3 Hz, 1H), 4.18 – 4.07 (m, 2H should be 2, integrates to 3 due to diastereomer overlapping), 3.82 (d, *J* = 10.4 Hz, 1H), 3.75 (s, 2H), 2.42 (s, 3H), 1.26 – 1.21 (m, 3H), 1.03 (s, 3H), 1.02 (s, 3H).

<sup>13</sup>C NMR (151 MHz, CDCl<sub>3</sub>) δ 171.99, 169.15, 142.21, 141.75, 134.26, 132.09, 129.75, 125.58, 123.55, 63.39, 61.60, 45.29, 40.13, 23.93, 21.84, 21.53, 14.19.

HRMS: *m/z* (ESI): Calcd. for C<sub>23</sub>H<sub>26</sub>N<sub>2</sub>O<sub>5</sub>S [M+Na]: 465.1460; found: 465.1464.

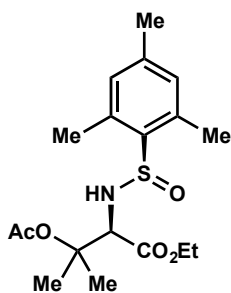

#### ethyl (*R*)-3-acetoxy-2-(((*R*)-mesitylsulfinyl)amino)-3-methylbutanoate (**8**)

The General Procedure I was followed on a 0.1 mmol scale using 1.5 equiv. of isopropenyl acetate as the olefin (16 μL, 0.15 mmol), ethyl (*R*)-2-((mesitylsulfinyl)imino)acetate as the imine (26 mg, 0.1 mmol), and EtOH as the cosolvent. Purification by FCC (hexanes/EtOAc 4:1) delivered 25 mg of the desired compound (68%) as a clear oil and a single diastereomer.

*R<sub>f</sub>*: 0.25 (7:3 hexanes:EtOAc)

<sup>1</sup>H NMR (600 MHz, CDCl<sub>3</sub>) δ 6.87 (s, 2H), 5.26 (d, *J* = 9.8 Hz, 1H), 4.53 (d, *J* = 9.9 Hz, 1H), 4.24 (ddq, *J* = 37.8, 10.8, 7.2 Hz, 2H), 2.58 (s, 6H), 2.29 (s, 3H), 1.97 (s, 3H), 1.56 (s, 3H), 1.39 (s, 3H), 1.30 (t, *J* = 7.2 Hz, 3H).

<sup>13</sup>C NMR (151 MHz, CDCl<sub>3</sub>) δ 171.28, 170.26, 141.21, 137.92, 136.97, 130.99, 82.01, 62.90, 62.00, 24.02, 23.11, 22.36, 21.18, 19.41, 14.23.

HRMS: *m/z* (ESI): Calcd. for C<sub>18</sub>H<sub>27</sub>NO<sub>5</sub>S [M+ H]: 370.1688; found: 370.1682.

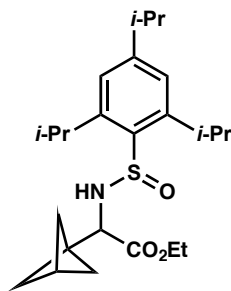

**ethyl 2-(bicyclo[1.1.1]pentan-1-yl)-2-(((2,4,6-triisopropylphenyl)sulfinyl)amino)acetate (9)**

The General Procedure I was followed on a 0.03 mmol scale using 2 equiv. of [1.1.1]propellane as the olefin (140  $\mu$ L of a 0.43 M solution in diethyl ether, 0.06 mmol), ethyl 2-(((2,4,6-triisopropylphenyl)sulfinyl)imino)acetate (10 mg, 0.03 mmol) and with the following modifications:

- $\text{Mn}(\text{dpm})_3$  (0.1 equiv, 20  $\mu$ L of a 0.15 M solution in PhH, 3  $\mu$ mol) instead of  $\text{Fe}(\text{acac})_3$  was used.
- PhH was used as the solvent (0.1 M, 300  $\mu$ L) and no alcohol was used as co-solvent.
- 3.5 equiv of  $\text{PhSiH}_2(\text{O}i\text{-Pr})$  were used.

Purification by PTLC (4:1 hexanes/EtOAc) delivered 6 mg of the desired compound (48%) as a clear oil and a single diastereomer. Crude NMR showed d.r. of >20:1.

$R_f$ : 0.37 (4:1 hexanes/EtOAc)

$^1\text{H NMR}$  (600 MHz,  $\text{CDCl}_3$ )  $\delta$  7.09 (s, 2H), 5.19 (d,  $J = 8.5$  Hz, 1H), 4.31 (dq,  $J = 10.7, 7.1$  Hz, 1H), 4.24 – 4.17 (m, 1H), 4.02 (d,  $J = 8.5$  Hz, 2H), 2.89 (hept,  $J = 7.0$  Hz, 1H), 2.50 (s, 2H), 1.74 (d,  $J = 2.3$  Hz, 6H), 1.34 (d,  $J = 6.9$  Hz, 6H), 1.31 (t,  $J = 7.1$  Hz, 3H), 1.26 (d,  $J = 2.3$  Hz, 6H), 1.25 (d,  $J = 2.5$  Hz, 6H).

$^{13}\text{C NMR}$  (151 MHz,  $\text{CDCl}_3$ )  $\delta$  171.30, 152.09, 147.94, 137.90, 123.13, 61.66, 58.83, 49.21, 44.73, 34.46, 28.30, 27.45, 24.61, 24.26, 23.92, 14.52.

LRMS: m/z (ESI): Calcd. for  $\text{C}_{24}\text{H}_{37}\text{NO}_3\text{S}$  [M+Na]: 442.2; found: 442.3.

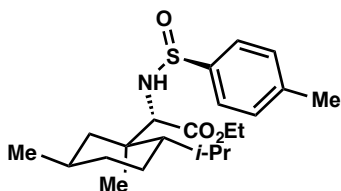

**ethyl (S)-2-(((1R,2S,5R)-2-isopropyl-1,5-dimethylcyclohexyl)-2-(((S)-p-tolylsulfinyl)amino)acetate (10)**

The General Procedure I was followed on a 0.1 mmol scale using 1.5 equiv of (1*S*,4*R*)-1-isopropyl-4-methyl-2-methylenecyclohexane as the olefin (23 mg, 0.15 mmol), ethyl (S)-2-((p-tolylsulfinyl)imino)acetate as the imine (24 mg, 0.1 mmol), and EtOH as the cosolvent. Purification by flash column chromatography (4:1 hexanes/EtOAc) delivered 22 mg of the desired compound (56%) as a clear oil white solid and a 7:1 mixture of major diastereomers. Crude d.r. was determined to be 5:1 of major diastereomers.

$R_f$ : 0.54 (7:3 hexanes/EtOAc)

$^1\text{H NMR}$  (600 MHz,  $\text{C}_6\text{D}_6$ )  $\delta$  7.77 (d,  $J = 8.1$  Hz, 2H), 6.83 (d,  $J = 8.3$  Hz, 2H), 4.79 (dd,  $J = 10.6, 3.9$  Hz, 1H), 4.30 (d,  $J = 10.1$  Hz, 1H), 3.97 (qq,  $J = 7.3, 3.7$  Hz, 2H), 1.92 (s, 3H), 1.71 (dd,  $J = 12.9, 3.7$  Hz, 1H), 1.58 (dq,  $J = 12.9, 3.3$  Hz, 1H), 1.45 (dq,  $J = 13.5, 3.6$  Hz, 1H), 1.40 – 1.27 (m, 2H), 1.22 – 1.10 (m, 2H), 1.03 (d,  $J = 6.8$  Hz, 3H), 0.98 (t,  $J = 7.2$  Hz, 3H), 0.96 (s, 3H), 0.94 – 0.89 (m, 1H), 0.89 – 0.84 (m, 1H), 0.75 (d,  $J = 4.1$  Hz, 3H), 0.74 (d,  $J = 4.7$  Hz, 3H).

$^{13}\text{C}$  NMR (151 MHz,  $\text{C}_6\text{D}_6$ )  $\delta$  173.05, 143.92, 141.32, 129.81, 125.55, 62.97, 61.16, 44.38, 42.56, 42.33, 35.63, 27.94, 25.61, 24.57, 23.05, 21.87, 21.04, 19.14, 18.62, 14.15.

HRMS:  $m/z$  (ESI): Calcd. for  $\text{C}_{22}\text{H}_{35}\text{NO}_3\text{S}$  [ $\text{M}^+ \text{H}$ ]: 394.2416; found: 394.2415.

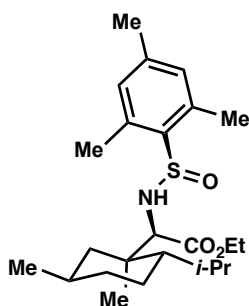

**ethyl (*R*)-2-(((1*R*,2*S*,5*R*)-2-isopropyl-1,5-dimethylcyclohexyl)-2-(((*R*)-mesitylsulfinyl)amino)acetate (**11**)**

The General Procedure I was followed on a 0.2 mmol scale using 1.5 equiv of (1*S*,4*R*)-1-isopropyl-4-methyl-2-methylenecyclohexane as the olefin (45 mg, 0.3 mmol) and *i*-PrOH as the cosolvent. Purification by flash column chromatography ( $\text{SiO}_2$ , 3:1 hexanes/EtOAc) delivered 59 mg of the desired compound (70%) as a clear oil and a 5:1 mixture of diastereomers.

$R_f$ : 0.45 (4:1 hexanes/EtOAc)

$^1\text{H}$  NMR (500 MHz,  $\text{CDCl}_3$ )  $\delta$  6.89 (s, 2H), 5.06 (d,  $J = 10.2$  Hz, 1H), 4.36 – 4.18 (m, 2H), 4.09 (d,  $J = 10.2$  Hz, 1H), 2.59 (s, 6H), 2.31 (s, 3H), 2.26-2.18 (m, 1H), 1.72-1.68 (br m, 1H), 1.55-1.48 (m, 1H), 1.46 – 1.38 (m, 1H), 1.37 – 1.31 (m, 3H), 1.25 (ddd,  $J = 12.7, 3.4, 2.1$  Hz, 1H), 1.15 (dd,  $J = 12.5, 3.6$  Hz, 1H), 1.06 (s, 3H), 0.95 (d,  $J = 6.8$  Hz, 3H), 0.89 – 0.83 (m, 4H), 0.79 (d,  $J = 6.8, 3\text{H}$ ), 0.73 (qd,  $J = 12.7, 3.8, 1.0$  Hz, 1H).

$^{13}\text{C}$  NMR (126 MHz,  $\text{CDCl}_3$ )  $\delta$  172.79, 140.85, 138.14, 136.80, 130.78, 65.37, 61.49, 46.25, 43.27, 41.94, 35.25, 27.64, 25.77, 23.86, 22.75, 21.79, 21.05, 19.32, 19.02, 18.39, 14.12.

HRMS:  $m/z$  (ESI): Calcd. for  $\text{C}_{24}\text{H}_{39}\text{NO}_3\text{S}$  [ $\text{M}^+ \text{H}$ ]: 422.2729; found: 422.2726.

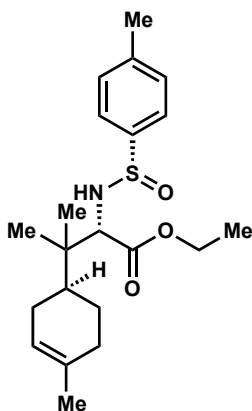

**ethyl (*S*)-3-methyl-3-(((*S*)-4-methylcyclohex-3-en-1-yl)-2-(((*S*)-*p*-tolylsulfinyl)amino)butanoate (**12**)**

The General Procedure I was followed on a 0.1 mmol scale using 1.5 equiv of (–)- $\alpha$ -pinene as the olefin (24  $\mu\text{L}$ , 0.15 mmol) and EtOH as the cosolvent. Purification by FCC (hexanes/EtOAc 4:1) delivered 16 mg of the desired compound (41%) as a white solid and a 4:1 mixture of diastereomers as well as 15% of a 4:1 mixture of diastereomers corresponding to the unrearranged pinene structure (not characterized).

$R_f$ : 0.16 (4:1 hexanes/EtOAc)

$^1\text{H NMR}$  (600 MHz,  $\text{C}_6\text{D}_6$ )  $\delta$  7.70 – 7.66 (m, 2H), 6.83 (d,  $J = 7.9$  Hz, 2H), 5.39 (dd,  $J = 5.5, 2.5$  Hz, 1H), 4.63 (d,  $J = 10.2$  Hz, 1H), 4.13 (d,  $J = 10.3$  Hz, 1H), 3.92 – 3.86 (m, 2H), 2.07 – 2.00 (m, 1H), 1.93 (s, 3H), 1.89 – 1.82 (m, 1H), 1.74 (dddd,  $J = 18.5, 9.5, 4.7, 2.7$  Hz, 2H), 1.65 (t,  $J = 2.1$  Hz, 3H), 1.38 – 1.24 (m, 1H), 0.90 (s, 3H), 0.78 (s, 3H).

$^{13}\text{C NMR}$  (151 MHz,  $\text{C}_6\text{D}_6$ )  $\delta$  172.85, 143.81, 141.18, 133.63, 129.71, 125.67, 121.47, 62.89, 61.03, 40.22, 39.94, 31.56, 26.92, 24.19, 23.55, 21.05, 20.26, 20.10, 14.08.

**HRMS:**  $m/z$  (ESI): Calcd. for  $\text{C}_{21}\text{H}_{31}\text{NO}_3\text{S}$  [ $\text{M} + \text{H}$ ]: 378.2103; found: 378.2101.

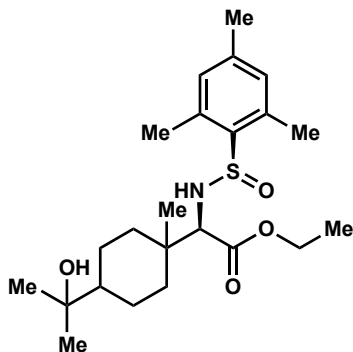

**ethyl (*R*)-2-(4-(2-hydroxypropan-2-yl)-1-methylcyclohexyl)-2-(((*R*)-mesitylsulfinyl)amino)acetate (13)**

The General Procedure I was followed on a 0.15 mmol scale using 1.5 equiv. of  $\alpha$ -terpineol as the olefin (39  $\mu\text{L}$ , 0.23 mmol), ethyl (*R*)-2-((mesitylsulfinyl)imino)acetate as the imine (38 mg, 0.15 mmol), and EtOH as the cosolvent. Purification by FCC (Hexanes/EtOAc 7:3) delivered 37 mg of the desired compound (59%) as a clear oil kind of fluffy and a 2:1 mixture of diastereomers.

$R_f$ : 0.24 (3:2 hexanes/EtOAc)

**Major diastereomer:**

$^1\text{H NMR}$  (600 MHz,  $\text{C}_6\text{D}_6$ )  $\delta$  6.55 (s, 2H), 5.24 (d,  $J = 10.3$  Hz, 1H), 4.12 – 4.01 (m, 2H), 3.66 (d,  $J = 10.4$  Hz, 1H), 2.64 (s, 6H), 1.95 (d,  $J = 2.3$  Hz, 3H), 1.72 – 1.60 (m, 2H), 1.57 – 1.46 (m, 4H), 1.17 – 1.07 (m, 3H), 1.03 (t,  $J = 7.2$  Hz, 3H), 0.96 (s, 6H), 0.87 (s, 3H).

$^{13}\text{C NMR}$  (151 MHz,  $\text{C}_6\text{D}_6$ )  $\delta$  172.92, 140.60, 139.27, 137.09, 131.13, 71.70, 68.42, 61.19, 48.93, 37.51, 34.65, 34.29, 27.31, 27.23, 22.64, 22.61, 20.85, 19.51, 18.25, 14.20.

**HRMS:**  $m/z$  (ESI): Calcd. for  $\text{C}_{23}\text{H}_{37}\text{NO}_4\text{S}$  [ $\text{M} + \text{H}$ ]: 424.2522; found: 424.2523.

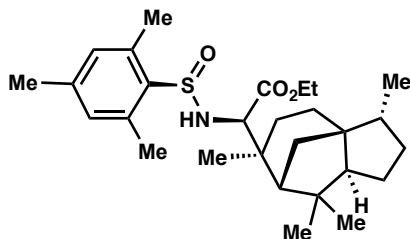

**ethyl (*R*)-2-(((*R*)-mesitylsulfinyl)amino)-2-((3*R*,3*aS*,6*S*,7*R*,8*aS*)-3,6,8,8-tetramethyloctahydro-1*H*-3*a*,7-methanoazulen-6-yl)acetate (14)**

The general procedure I was followed on a 0.1 mmol scale using 1.5 equiv. of (–)- $\alpha$ -cedrene as the olefin (33  $\mu\text{L}$ , 0.15 mmol), ethyl (*R*)-2-((mesitylsulfinyl)imino)acetate as the imine (26 mg, 0.1 mmol), and EtOH as the

cosolvent. Purification by flash column chromatography (SiO<sub>2</sub>, 9:1 hexanes/EtOAc) delivered 13 mg of the desired compound (28%) as a clear oil and a single diastereomer.

*R<sub>f</sub>*: 0.45 (4:1 hexanes/EtOAc)

<sup>1</sup>H NMR (500 MHz, CDCl<sub>3</sub>) δ 6.90 (s, 2H), 5.06 (d, *J* = 9.7 Hz, 1H), 4.35 (d, *J* = 9.7 Hz, 1H), 4.30 (dq, *J* = 10.8, 7.2 Hz, 1H), 4.17 (dq, *J* = 10.7, 7.1 Hz, 1H), 2.60 (s, 6H), 2.31 (s, 3H), 1.97 - 1.91 (m, 3H), 1.80 - 1.71 (m, 2H), 1.67 (ddd, *J* = 13.0, 4.8, 2.5 Hz, 1H), 1.58 - 1.50 (m, 2H), 1.46 - 1.38 (m, 3H), 1.36 - 1.27 (m, 5H), 1.23 (s, 3H), 1.03 (s, 3H), 0.91 (s, 3H), 0.90 (d, *J* = 7.1 Hz, 3H).

<sup>13</sup>C NMR (126 MHz, CDCl<sub>3</sub>) δ 173.14, 140.87, 138.21, 136.70, 130.81, 61.18, 61.11, 57.80, 56.85, 53.54, 44.99, 43.14, 41.75, 40.27, 36.97, 30.01, 29.97, 29.50, 29.32, 25.41, 21.05, 20.23, 19.33, 15.52, 14.13.

HRMS: *m/z* (ESI): Calcd. for C<sub>28</sub>H<sub>43</sub>NO<sub>3</sub>S [M + H]: 474.3042; found: 474.3043.

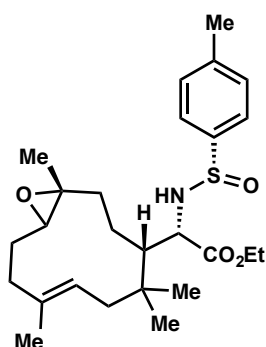

**ethyl (2*S*)-2-(((1*R*,4*S*,*E*)-1,5,5,8-tetramethyl-12-oxabicyclo[9.1.0]dodec-7-en-4-yl)-2-(((*S*)-*p*-tolylsulfinyl)amino)acetate (15)**

The General Procedure I was followed on a 0.2 mmol scale using 1.5 equiv. of (–)-caryophyllene oxide the olefin (66 mg, 0.3 mmol) and EtOH as the cosolvent. Purification by flash column chromatography (SiO<sub>2</sub>, 9:1 then 7:3 hexanes/EtOAc) delivered 23 mg of the desired compound (25% IY) as a clear oil and a 10:1 mixture of diastereomers.

*R<sub>f</sub>*: 0.23 (7:3 hexanes/EtOAc)

<sup>1</sup>H NMR (500 MHz, C<sub>6</sub>D<sub>6</sub>) δ 7.75 (d, *J* = 8.2 Hz, 2H), 6.90 (d, *J* = 8.1 Hz, 2H), 5.14 (d, *J* = 10.0 Hz, 1H), 4.84 - 4.71 (m, 1H), 4.41 (dd, *J* = 9.2, 2.0 Hz, 1H), 3.94 - 3.89 (m, 1H), 3.86 - 3.80 (m, 1H), 2.70 (dd, *J* = 10.9, 1.9 Hz, 1H), 2.13 (dd, *J* = 16.0, 10.0 Hz, 2H), 2.10 - 2.05 (m, 1H), 2.00 - 1.95 (m, 1H), 1.94 (s, 3H), 1.93 - 1.90 (m, 1H), 1.86 - 1.78 (m, 3H), 1.63 (ddd, *J* = 15.5, 4.1, 2.2 Hz, 1H), 1.50 - 1.43 (m, 1H), 1.32 (t, *J* = 1.6 Hz, 3H), 1.30 - 1.23 (m, 1H), 1.19 (s, 3H), 0.99 (s, 3H), 0.98 (s, 3H), 0.96 - 0.94 (dd, *J* = 7.5, 2.2 Hz, 2H), 0.90 (t, *J* = 7.2 Hz, 5H), 0.81 - 0.79 (d, *J* = 1.8 Hz, 1H).

<sup>13</sup>C NMR (126 MHz, C<sub>6</sub>D<sub>6</sub>) δ 174.03, 143.15, 141.03, 134.05, 129.46, 127.88, 127.69, 127.50, 125.49, 121.69, 63.05, 61.41, 61.27, 55.78, 49.12, 41.16, 37.55, 36.91, 36.76, 27.51, 24.69, 24.50, 20.72, 18.75, 17.05, 15.50, 13.64.

HRMS: *m/z* (ESI): Calcd. for C<sub>26</sub>H<sub>39</sub>NO<sub>4</sub>S [M+Na]: 462.2678; found: 462.2675.

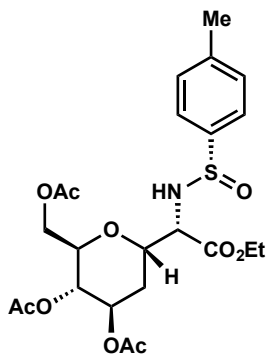

**(2*R*,3*S*,4*R*,6*S*)-2-(acetoxymethyl)-6-((*S*)-2-ethoxy-2-oxo-1-(((*S*)-*p*-tolylsulfinyl)amino)ethyl)tetrahydro-2*H*-pyran-3,4-diyl diacetate (16)**

The General Procedure I was followed on a 0.1 mmol scale using 3 equiv. of tri-*O*-acetyl-*D*-glucal as the olefin (82 mg, 0.3 mmol) and EtOH as the cosolvent. Purification by PTLC (Hexanes/EtOAc 1:1) delivered 20 mg of the desired compound (39%) as a clear oil and a 4:1 mixture of diastereomers.

*R*<sub>f</sub>: 0.16 (1:1 hexanes/EtOAc)

<sup>1</sup>H NMR (500 MHz, C<sub>6</sub>D<sub>6</sub>) δ 7.75 (d, *J* = 8.3 Hz, 2H), 6.95 (d, *J* = 8.3 Hz, 2H), 5.33 (ddd, *J* = 8.3, 6.9, 4.3 Hz, 1H), 5.18 (dd, *J* = 6.9, 6.9 Hz, 1H), 4.62 (dd, *J* = 11.7, 5.4 Hz, 1H), 4.59 – 4.57 (br m, 1H), 4.21 (dd, *J* = 10.0, 8.7 Hz, 1H), 4.09 (dd, *J* = 14.3, 3.4 Hz, 1H), 4.10 – 4.06 (m, 1H), 4.04 – 4.00 (m, 1H), 3.99 (dt, *J* = 7.1, 1.0 Hz, 2H), 2.50 – 2.39 (m, 1H), 2.00 (s, 3H), 1.81 (s, 3H), 1.79 – 1.76 (m, 1H), 1.73 (s, 3H), 1.73 (s, 3H), 0.98 (t, *J* = 7.1 Hz, 3H).

<sup>13</sup>C NMR (126 MHz, C<sub>6</sub>D<sub>6</sub>) δ 170.83, 169.89, 169.05, 169.01, 142.59, 141.10, 129.51, 125.72, 72.41, 72.02, 68.22, 68.22, 61.37, 61.11, 57.13, 28.79, 20.76, 20.23, 20.08, 20.07, 13.76.

HRMS: *m/z* (ESI): Calcd. for C<sub>24</sub>H<sub>39</sub>NO<sub>3</sub>S [M+H]: 514.1747; found: 514.1752.

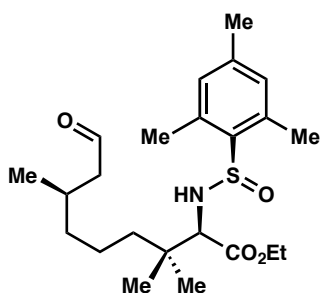

**ethyl (2*R*,7*R*)-2-(((*R*)-mesitylsulfinyl)amino)-3,3,7-trimethyl-9-oxononanoate (17)**

The General Procedure I was followed on a 0.2 mmol scale using 1.5 equiv of (*S*)-(-)-citronellal as the olefin (54 μL, 0.3 mmol), ethyl (*R*)-2-((mesitylsulfinyl)imino)acetate as the imine (53 mg, 0.2 mmol), and *i*-PrOH as the cosolvent. Purification by flash column chromatography (SiO<sub>2</sub>, 9:1 then 4:1 hexanes/EtOAc) delivered 46 mg of the desired compound (54%) as a clear oil and a single diastereomer.

*R*<sub>f</sub>: 0.27 (4:1 hexanes/EtOAc)

<sup>1</sup>H NMR (600 MHz, CDCl<sub>3</sub>) δ 9.76 (t, *J* = 2.3 Hz, 1H), 6.87 (s, 2H), 5.03 (d, *J* = 10.1 Hz, 1H), 4.31 – 4.16 (m, 2H), 3.71 (d, *J* = 10.1 Hz, 1H), 2.56 (s, 6H), 2.29 (s, 3H), 2.11 – 2.00 (m, *J* = 5.6 Hz, 1H), 1.34 – 1.29 (m, 10H), 0.97 (d, *J* = 6.7 Hz, 3H), 0.91 (d, *J* = 4.7 Hz, 6H).

<sup>13</sup>C NMR (126 MHz, CDCl<sub>3</sub>) δ 202.94, 172.86, 141.09, 138.09, 136.89, 130.95, 64.87, 61.49, 51.25, 39.58, 37.72, 37.70, 28.28, 23.93, 23.80, 21.22, 21.17, 20.05, 19.42, 14.31.

HRMS:  $m/z$  (ESI): Calcd. for  $C_{23}H_{37}NO_4S$   $[M+H]$  424.2522; found: 424.2518.

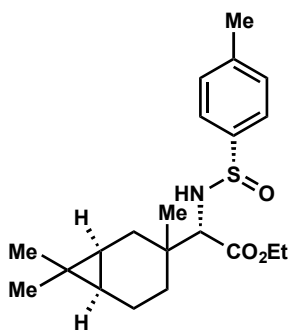

**ethyl (2S)-2-(((S)-p-tolylsulfinyl)amino)-2-((1S,6R)-3,7,7-trimethylbicyclo[4.1.0]heptan-3-yl)acetate (18)**

The General Procedure I was followed on a 0.1 mmol scale using 1.5 equiv of (+)-2-carene as the olefin (24  $\mu$ L, 0.15 mmol), ethyl (S)-2-((p-tolylsulfinyl)imino)acetate as the imine (24 mg, 0.1 mmol), and EtOH as the cosolvent. Purification by flash column chromatography ( $SiO_2$ , 4:1 hexanes/EtOAc) delivered 16 mg of the desired compound (42%) as a white solid and a 1:1 mixture of major diastereomers.

$R_f$ : 0.24 (4:1 hexanes/EtOAc)

**Major two diastereomers:**

$^1H$  NMR (600 MHz,  $CDCl_3$ )  $\delta$  7.58 (d,  $J = 8.2$  Hz, 4H), 7.29 (dtd,  $J = 8.6, 4.8, 4.3, 2.4$  Hz, 4H), 4.60 (d,  $J = 10.0$  Hz, 1H), 4.58 (d,  $J = 10.4$  Hz, 1H), 4.32 – 4.04 (m, 6H), 3.54 (d,  $J = 9.8$  Hz, 1H), 2.41 (d,  $J = 2.1$  Hz, 6H), 2.03 – 1.96 (m, 2H), 1.88 – 1.75 (m, 3H), 1.72 (dddd,  $J = 13.3, 6.6, 3.4, 1.8$  Hz, 1H), 1.67 – 1.60 (m, 2H), 1.29 (t,  $J = 7.1$  Hz, 3H), 1.22 (t,  $J = 7.1$  Hz, 3H), 1.15 – 1.08 (m, 2H), 1.03 (s, 3H), 0.99 (s, 3H), 0.95 (s, 6H), 0.90 (s, 3H), 0.72 – 0.68 (m, 3H).

$^{13}C$  NMR (151 MHz,  $CDCl_3$ )  $\delta$  173.02, 172.37, 142.35, 142.22, 141.67, 141.66, 129.68, 129.66, 125.53, 125.45, 66.17, 61.29, 61.21, 59.60, 36.24, 35.80, 31.93, 29.97, 29.19, 29.11, 28.15, 23.31, 21.51, 21.50, 19.14, 18.29, 17.80, 17.74, 17.34, 17.30, 16.01, 15.60, 15.40, 15.11, 14.31, 14.26.

LRMS:  $m/z$  (ESI): Calcd. for  $C_{21}H_{31}NO_3S$   $[M+Na]$ : 400.2, found: 400.2.

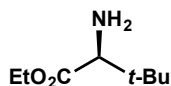

**ethyl (S)-2-amino-3,3-dimethylbutanoate (SI-6)**

Synthesized according to the known procedure<sup>xvii</sup> and worked up with  $NaHCO_3$  (aq). Purified by FCC (5:1 to 0:1 hexanes/EtOAc).

$^1H$  NMR (400 MHz,  $CDCl_3$ )  $\delta$  4.23 – 4.16 (m, 2H), 3.19 (s, 1H), 1.30 (t,  $J = 7.1$  Hz, 3H), 0.99 (s, 9H).

$[\alpha]_D^{20} = +47.1$  ( $CHCl_3$ ,  $c = 1.20$ ).

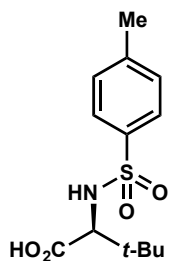

**(S)-3,3-dimethyl-2-((4-methylphenyl)sulfonamido)butanoic acid (SI-8)**

Prepared according to a known procedure.<sup>xviii</sup> Data matched those ones reported.

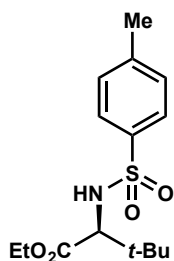

**ethyl (S)-3,3-dimethyl-2-((4-methylphenyl)sulfonamido)butanoate (SI-9)**

Synthesis from (L)-*tert*-leucine:

To a stirred solution of (S)-3,3-dimethyl-2-((4-methylphenyl)sulfonamido)butanoic acid (**SI-8**) (300 mg, 1.05 mmol) in EtOH (5.0 mL) was added conc. H<sub>2</sub>SO<sub>4</sub> (5 drops). After stirring for 15 hr at reflux, the reaction was cooled to room temperature and water was added. The aqueous layer was extracted with EtOAc. The organic layer was washed with aq. NaHCO<sub>3</sub>, brine and dried over MgSO<sub>4</sub>. To the solution of the crude product in ether was added hexanes to give precipitate, which was filtered and dried to give the title compounds (211 mg, 0.674 mmol, 64%) as a white solid. Characterization data (<sup>1</sup>H, <sup>13</sup>C NMR and HRMS) were in accordance with those obtained below (*see synthesis of SI-9 from 3*).

$$[\alpha]_D^{20} = +38.37 \text{ (CHCl}_3, c = 0.258)$$

Synthesis from **3**:

To a stirred solution of **3** (18.5 mg, 0.062 mmol, dr = 5:1) in DCM (2 mL) was added *m*-CPBA (70 wt%, 24.0 mg, 0.10 mmol) at room temperature. After stirring for 1h at the same temperature, saturated aq. Na<sub>2</sub>S<sub>2</sub>O<sub>3</sub> was added. The aqueous layer was extracted with EtOAc. The organic layer was washed with aq. NaHCO<sub>3</sub>, brine and dried over MgSO<sub>4</sub>. The crude product was purified by silica-gel column chromatography (hexanes:EtOAc = 10:1 to 3:1) to give **SI-9** (er = 5:1, 10.9 mg, 59%) as a white solid.

<sup>1</sup>H NMR (500 MHz, CDCl<sub>3</sub>) δ 7.72 (d, *J* = 8.3 Hz, 2H), 7.31 – 7.28 (m, 2H), 5.13 (d, *J* = 10.7 Hz, 1H), 3.86 – 3.72 (m, 2H), 3.56 (d, *J* = 10.7 Hz, 1H), 2.43 (s, 3H), 1.06 (t, *J* = 7.1 Hz, 3H), 0.98 (s, 9H).

<sup>13</sup>C NMR (126 MHz, CDCl<sub>3</sub>) δ 170.89, 143.58, 136.54, 129.52, 127.49, 64.19, 61.05, 34.64, 26.33, 21.49, 13.86.

HRMS: *m/z* (ESI): Calcd. for C<sub>15</sub>H<sub>23</sub>NO<sub>4</sub>S [M+H]: 314.1426; found: 314.1425.

$$[\alpha]_D^{20} = +24.4 \text{ (CHCl}_3, c = 0.258)$$

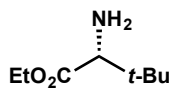

**ethyl (R)-2-amino-3,3-dimethylbutanoate (SI-10)**



To a stirred solution of **4** was added MeOH (1 mL) and TFA (1 mL) at room temperature. After stirring for 30 minutes, solvents were evaporated and aq. NaHCO<sub>3</sub> was added. The aqueous layer was extracted EtOAc twice. Combined organic layers were washed with brine and dried over MgSO<sub>4</sub>, concentrated under reduced pressure. The residue was purified by silica-gel column chromatography (Hexanes/EtOAc = 5:1 - 0:1) to give **SI-10** (52%, 8.3 mg, 0.052 mmol).

$$[\alpha]_D^{20} = -40.0 \text{ (CHCl}_3, c = 0.10)$$

## I. Characterization of alcohol derivatives

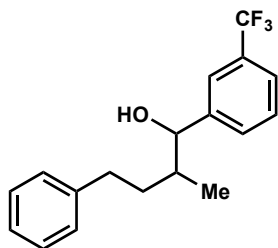

### 2-methyl-4-phenyl-1-(3-(trifluoromethyl)phenyl)butan-1-ol (**21**)

The General Procedure **IV** was followed in a 0.15 mmol scale, using 4-phenyl-1-butene as the olefin (23  $\mu$ L, 0.15 mmol), 3-(trifluoromethyl)benzaldehyde as the aldehyde (36  $\mu$ L, 0.27 mmol), and with the following modifications:

- Co(salen)Cl was used instead of Co(salen) (19 mg, 0.03 mmol, 0.2 equiv.)
- No oxidant was added.

Purification by flash column chromatography (SiO<sub>2</sub>, hexanes then 9:1 hexanes/EtOAc) delivered 33 mg of the desired compound (72%) as a pale yellow oil and a 1:1 mixture of diastereomers.

*R<sub>f</sub>*: 0.64 (4:1 hexanes/EtOAc)

<sup>1</sup>H NMR (500 MHz, CDCl<sub>3</sub>)  $\delta$  7.57 (d, *J* = 7.4 Hz, 2H), 7.53 (t, *J* = 7.0 Hz, 2H), 7.50 – 7.41 (m, 4H), 7.28 (d, *J* = 7.5 Hz, 3H), 7.26 (d, *J* = 2.2 Hz, 1H), 7.22 – 7.17 (m, 2H), 7.14 (td, *J* = 8.5, 7.8, 1.5 Hz, 4H), 4.69 (d, *J* = 5.2 Hz, 1H), 4.57 (d, *J* = 6.4 Hz, 1H), 2.74 (tdd, *J* = 13.5, 10.0, 5.3 Hz, 2H), 2.57 (dddd, *J* = 20.1, 13.7, 10.0, 6.6 Hz, 2H), 2.00 – 1.80 (m, 3H), 1.75 (dddd, *J* = 13.6, 9.9, 6.6, 4.9 Hz, 1H), 1.53 – 1.40 (m, 2H), 0.95 (d, *J* = 6.7 Hz, 3H), 0.88 (d, *J* = 6.8 Hz, 3H).

<sup>13</sup>C NMR (151 MHz, CDCl<sub>3</sub>)  $\delta$  144.70, 144.44, 142.46, 142.26, 130.70 (q, *J* = 32.4 Hz), 130.13, 129.83, 128.77, 128.76, 128.52, 128.50, 128.47, 128.45, 125.98, 125.92, 124.41 (q, *J* = 3.9 Hz), 124.31 (q, *J* = 273.1 Hz), 124.24 (q, *J* = 3.9 Hz), 123.53 (q, *J* = 3.7 Hz), 123.23 (q, *J* = 3.9 Hz), 78.40, 77.27, 39.81, 39.76, 34.89, 33.74, 33.52, 33.37, 15.79, 14.07.

The diastereomer overlaps at 130.70 and 124.31 ppm.

<sup>19</sup>F NMR (376 MHz, CDCl<sub>3</sub>)  $\delta$  -62.76.

HRMS: *m/z* (APCI): Calcd. for C<sub>18</sub>H<sub>19</sub>F<sub>3</sub>O [*M* – H<sub>2</sub> + H] 307.1310; found: 307.1312.

Dehydrogenation appear to occur under the APCI conditions.

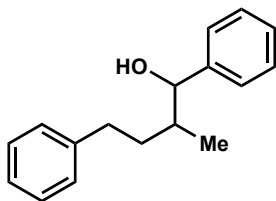

### 2-methyl-1,4-diphenylbutan-1-ol (22)

The General Procedure II was followed in a 0.15 mmol scale using 4-phenyl-1-butene as the olefin (23  $\mu$ L, 0.15 mmol), and benzaldehyde as the aldehyde (30  $\mu$ L, 0.3 mmol). Purification by flash column chromatography (SiO<sub>2</sub>, hexanes then 9:1 hexanes/Et<sub>2</sub>O) delivered 28 mg of the desired compound (78%) as a pale yellow oil and a 1:1.1 mixture of diastereomers.

*R<sub>f</sub>*: 0.28 (9:1 hexanes/EtOAc)

<sup>1</sup>H NMR (500 MHz, CDCl<sub>3</sub>)  $\delta$  7.57 (d, *J* = 7.4 Hz, 2H), 7.53 (t, *J* = 7.0 Hz, 2H), 7.50 – 7.41 (m, 5H), 7.28 (d, *J* = 7.5 Hz, 2H), 7.26 (d, *J* = 2.2 Hz, 2H), 7.22 – 7.17 (m, 2H), 7.14 (td, *J* = 8.5, 7.8, 1.5 Hz, 5H), 4.69 (d, *J* = 5.2 Hz, 1H), 4.57 (d, *J* = 6.4 Hz, 1H), 2.74 (tdd, *J* = 13.5, 10.0, 5.3 Hz, 2H), 2.57 (dddd, *J* = 20.1, 13.7, 10.0, 6.6 Hz, 2H), 2.00 – 1.80 (m, 3H), 1.75 (dddd, *J* = 13.6, 9.9, 6.6, 4.9 Hz, 1H), 1.53 – 1.40 (m, 2H), 0.95 (d, *J* = 6.7 Hz, 3H), 0.88 (d, *J* = 6.8 Hz, 3H).

<sup>13</sup>C NMR (151 MHz, CDCl<sub>3</sub>)  $\delta$  143.69, 143.52, 142.81, 142.60, 128.52, 128.49, 128.44, 128.43, 128.38, 128.37, 127.64, 127.48, 126.81, 126.53, 125.83, 125.80, 79.09, 78.20, 39.89, 39.83, 34.93, 34.23, 33.59, 33.50, 15.83, 14.60.

HRMS: *m/z* (APCI): Calcd. for C<sub>17</sub>H<sub>20</sub>O [M + Na]: 263.1412; found: 263.1414.

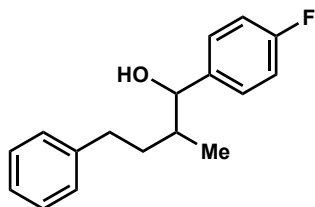

### 1-(4-fluorophenyl)-2-methyl-4-phenylbutan-1-ol (24)

Following General Procedure IV, a mixture of 4-fluorobenzaldehyde (33.0  $\mu$ L, 0.30 mmol, 1.5 equiv), and 4-phenyl-1-butene (24.0  $\mu$ L, 0.15 mmol, 1.0 equiv) was stirred for 24 h. Purification by flash column chromatography (SiO<sub>2</sub>, 9:1 to 7:3 hexanes/EtOAc) furnished the title compound as clear, pale yellow oil (35.0 mg, 90% yield) as an inseparable 1:1:1 mixture of diastereomers.

*R<sub>f</sub>*: 0.25 (4:1 hexanes/EtOAc)

<sup>1</sup>H NMR (500 MHz, CDCl<sub>3</sub>)  $\delta$  7.31 – 7.21 (m, 7H), 7.18 (ddt, *J* = 9.8, 7.5, 2.2 Hz, 4H), 7.14 – 7.09 (m, 2H), 7.06 – 6.98 (m, 4H), 4.56 (dd, *J* = 6.0, 2.2 Hz, 1H), 4.50 – 4.45 (m, 1H), 2.73 (dddd, *J* = 25.9, 13.7, 10.5, 5.2 Hz, 2H), 2.55 (ddt, *J* = 13.6, 10.0, 6.7 Hz, 2H), 1.97 (dddd, *J* = 13.9, 10.4, 6.5, 3.5 Hz, 1H), 1.89 – 1.76 (m, 4H), 1.70 (dddd, *J* = 13.5, 10.2, 6.5, 4.5 Hz, 1H), 1.50 – 1.34 (m, 2H), 0.99 (d, *J* = 6.7 Hz, 3H), 0.85 (d, *J* = 6.8 Hz, 2H);

<sup>13</sup>C NMR (126 MHz, CDCl<sub>3</sub>)  $\delta$  162.27 (d, *J* = 245.1 Hz), 162.18 (d, *J* = 245.1 Hz), 142.66, 142.45, 139.27 (d, *J* = 18.96 Hz), 139.25 (d, *J* = 18.96 Hz), 128.49, 128.46, 128.35, 128.29, 128.10, 128.04, 125.89, 125.85, 115.24, 115.07, 78.38, 77.58, 39.93, 39.87, 34.82, 34.16, 33.54, 33.45, 15.72, 14.58.

$^{19}\text{F}$  NMR (376 MHz,  $\text{CDCl}_3$ )  $\delta$  -115.49, -115.69;

GC: (GC/MSD; HP-5MS UI; 139 Kpa; flow rate 2 mL/min; inlet temperature 250 °C; column temperature 50 °C for 0 min, then 20 °C/min to 100 °C, then 70 °C/min to 250 °C, then 5 °C/min to 280 °C):  $t_R$  = 6.610 min;

MS: (EI, 70 eV):  $m/z$  (%)  $\text{C}_{17}\text{H}_{19}\text{FO}$  calc. 258.14: 240.1 (5), 197.1 (7), 136.1 (37), 125.1 (100), 109.1 (7), 97.1 (23), 91.1 (33). Ion peak corresponds to M-OH

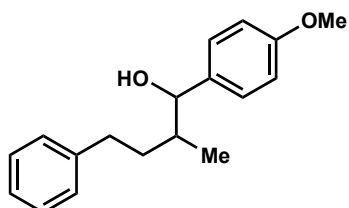

### 1-(4-methoxyphenyl)-2-methyl-4-phenylbutan-1-ol (25)

The General Procedure II was followed in a 0.15 mmol scale using 4-phenyl-1-butene as the olefin (23  $\mu\text{L}$ , 0.15 mmol), anisaldehyde as the aldehyde (36  $\mu\text{L}$ , 0.3 mmol). Purification by flash column chromatography ( $\text{SiO}_2$ , hexanes then 9:1 hexanes/EtOAc) delivered 26 mg of the desired compound (63%) as a clear oil.

$R_f$ : 0.34 (4:1 hexanes/EtOAc)

$^1\text{H}$  NMR (400 MHz,  $\text{CDCl}_3$ )  $\delta$  7.28 (dt,  $J$  = 8.2, 1.3 Hz, 2H), 7.25 – 7.13 (m, 10H), 7.13 – 7.09 (m, 2H), 6.91 – 6.84 (m, 4H), 4.50 (d,  $J$  = 6.2 Hz, 1H), 4.42 (d,  $J$  = 7.1 Hz, 1H), 3.81 (s, 3H), 3.81 (s, 3H), 2.73 (dddd,  $J$  = 27.0, 13.6, 10.5, 5.2 Hz, 2H), 2.54 (dddd,  $J$  = 19.9, 13.6, 10.3, 6.4 Hz, 2H), 2.01 (dddd,  $J$  = 17.0, 10.4, 6.3, 3.6 Hz, 1H), 1.91 – 1.79 (m, 2H), 1.74 – 1.65 (m, 1H), 1.52 – 1.41 (m, 1H), 1.41 – 1.32 (m, 1H), 1.01 (d,  $J$  = 6.7 Hz, 3H), 0.83 (d,  $J$  = 6.8 Hz, 3H).

$^{13}\text{C}$  NMR (151 MHz,  $\text{CDCl}_3$ )  $\delta$  159.13, 159.03, 142.89, 142.66, 135.83, 135.72, 128.54, 128.50, 128.44, 128.42, 127.95, 127.73, 125.81, 125.79, 113.77, 113.76, 78.69, 78.08, 55.41, 39.93, 39.85, 34.84, 34.48, 33.56, 33.52, 15.76, 14.93. The diastereomers overall at the OMe signal.

HRMS:  $m/z$  (APCI): Calcd. for  $\text{C}_{18}\text{H}_{22}\text{O}_2$  [M – OH]: 253.1592; found: 253.1600.

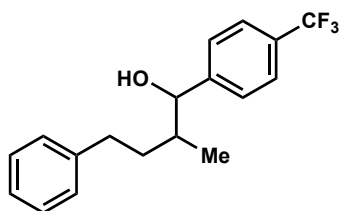

### 2-methyl-4-phenyl-1-(4-(trifluoromethyl)phenyl)butan-1-ol (26)

The General Procedure II was followed in a 0.15 mmol scale using 4-phenyl-1-butene as the olefin (23  $\mu\text{L}$ , 0.15 mmol), 4-(trifluoromethyl)benzaldehyde as the aldehyde (40  $\mu\text{L}$ , 0.3 mmol). Purification by flash column chromatography ( $\text{SiO}_2$ , hexanes then 9:1 hexanes/ $\text{Et}_2\text{O}$ ) delivered 37 mg of the desired compound (80%) as a pale yellow oil and a 1:1 mixture of diastereomers.

$R_f$ : 0.23 (9:1 hexanes/EtOAc)

$^1\text{H}$  NMR (600 MHz,  $\text{CDCl}_3$ )  $\delta$  7.61 (dd,  $J$  = 8.3, 3.2 Hz, 4H), 7.43 (t,  $J$  = 9.0 Hz, 4H), 7.35 – 7.25 (m, 4H), 7.24 – 7.19 (m, 2H), 7.17 (t,  $J$  = 6.8 Hz, 4H), 4.72 (d,  $J$  = 5.1 Hz, 1H), 4.60 (d,  $J$  = 6.2 Hz, 1H), 2.77 (tdd,  $J$  = 13.5,

10.0, 5.3 Hz, 2H), 2.59 (dddd,  $J = 28.0, 13.8, 10.0, 6.6$  Hz, 2H), 2.00 – 1.83 (m, 3H), 1.79 (dddd,  $J = 13.5, 10.0, 6.5, 4.8$  Hz, 1H), 1.54 – 1.43 (m, 2H), 0.97 (d,  $J = 6.7$  Hz, 3H), 0.92 (d,  $J = 6.8$  Hz, 3H).

$^{13}\text{C}$  NMR (151 MHz,  $\text{CDCl}_3$ )  $\delta$  147.66, 147.38, 142.46, 142.28, 129.78 (q,  $J = 25.8$  Hz), 129.56 (q,  $J = 25.8$  Hz), 128.52, 128.49, 128.48, 128.47, 127.06, 126.74, 125.99, 125.92, 125.26 (q,  $J = 4.2, 3.7$  Hz), 124.36 (q,  $J = 272.9$  Hz), 78.38, 77.22, 39.83, 39.78, 34.89, 33.74, 33.58, 33.41, 15.76, 14.06.

The diastereomers overlap at 125.26 and at 124.36.

$^{19}\text{F}$  NMR (376 MHz,  $\text{CDCl}_3$ )  $\delta$  -62.63, -62.65.

Diastereomer 1:

**GC:** (GC/MSD; HP-5MS UI; 139 Kpa; flow rate 2 mL/min; inlet temperature 250 °C; column temperature 50 °C for 0 min, then 20 °C/min to 100 °C, then 30°C/min to 280 °C):  $t_R = 7.508$  min;

**MS:** (EI, 70 eV):  $m/z$  (%): 308.2 (0.4), 290.1 (6), 202.1 (10), 186.1 (11), 179.1 (10), 175.0 (48), 159.1 (3), 133.1 (7), 127.0 (30), 104.1 (50), 91.1 (100), 65.1 (10), 55.0 (1).

Diastereomer 2:

**GC:** (GC/MSD; HP-5MS UI; 139 Kpa; flow rate 2 mL/min; inlet temperature 250 °C; column temperature 50 °C for 0 min, then 20 °C/min to 100 °C, then 30°C/min to 280 °C):  $t_R = 7.536$  min;

**MS:** (EI, 70 eV):  $m/z$  (%): 308.1 (0.2), 290.1 (6), 202.1 (6), 186.1 (24), 175.0 (49), 145.0 (8), 133.1 (5), 127.0 (34), 104.1 (71), 91.1 (100).

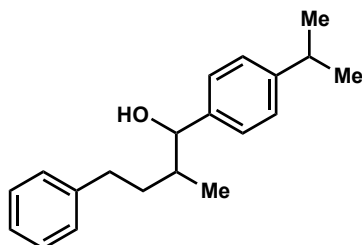

### 1-(4-isopropylphenyl)-2-methyl-4-phenylbutan-1-ol (27)

Following General Procedure II, a mixture of 4-isopropylbenzaldehyde (45.5  $\mu\text{L}$ , 0.30 mmol, 1.5 equiv), and 4-phenyl-1-butene (24.0  $\mu\text{L}$ , 0.15 mmol, 1.0 equiv) was stirred for 24 h. Purification by flash column chromatography ( $\text{SiO}_2$ , 9:2 hexanes/EtOAc) furnished the title compound as clear oil (13.3 mg, 32% yield) as an inseparable 1:1 mixture of diastereomers.

$R_f$ : 0.35 (9:1 hexanes/EtOAc)

$^1\text{H}$  NMR (400 MHz,  $\text{CDCl}_3$ )  $\delta$  7.30 – 7.08 (m, 18H), 4.55 (dd,  $J = 5.9, 2.6$  Hz, 1H), 4.45 (d,  $J = 6.7$  Hz, 1H), 3.01 – 2.84 (m, 2H), 2.74 (dddd,  $J = 24.2, 19.2, 10.5, 5.3$  Hz, 2H), 2.55 (tdd,  $J = 13.8, 10.2, 6.4$  Hz, 2H), 2.03 (dddd,  $J = 13.4, 10.3, 6.4, 3.6$  Hz, 1H), 1.95 – 1.79 (m, 2H), 1.79 – 1.65 (m, 3H), 1.53 – 1.34 (m, 2H), 1.25 (dd,  $J = 6.9, 1.1$  Hz, 12H), 1.01 (d,  $J = 6.7$  Hz, 3H), 0.84 (d,  $J = 6.8$  Hz, 3H);

$^{13}\text{C}$  NMR (151 MHz,  $\text{CDCl}_3$ )  $\delta$  148.31, 148.14, 142.89, 142.68, 141.08, 140.94, 128.53, 128.50, 128.42, 128.40, 126.79, 126.53, 126.42, 126.41, 125.79, 125.77, 78.99, 78.19, 39.85, 39.76, 34.89, 34.35, 33.95, 33.93, 33.59, 33.51, 24.16, 15.87, 14.76. 1 peak of the diastereomers is not observed due to overlap.

**HRMS:**  $m/z$  (APCI): Calcd. for  $\text{C}_{20}\text{H}_{26}\text{O}$  [M-OH]: 265.1956; found: 265.1955.

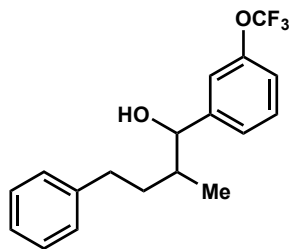

### 2-methyl-4-phenyl-1-(3-(trifluoromethoxy)phenyl)butan-1-ol (28)

Following General Procedure II, a mixture of 3-trifluoromethoxybenzaldehyde (43.0  $\mu\text{L}$ , 0.30 mmol, 1.5 equiv), and 4-phenyl-1-butene (24.0  $\mu\text{L}$ , 0.15 mmol, 1.0 equiv) was stirred for 24 h. Purification by flash column chromatography ( $\text{SiO}_2$ , 9:1 hexanes/EtOAc) furnished the title compound as clear, pale yellow oil (29.2 mg, 60% yield) as an inseparable 1.1:1 mixture of diastereomers.

$R_f$ : 0.25 (9:1 hexanes/EtOAc)

$^1\text{H NMR}$  (400 MHz,  $\text{CD}_2\text{Cl}_2$ )  $\delta$  7.37 (td,  $J = 7.9, 1.4$  Hz, 2H), 7.30 – 7.08 (m, 15H), 4.66 (d,  $J = 5.0$  Hz, 1H), 4.54 (d,  $J = 6.1$  Hz, 1H), 2.73 (ddq,  $J = 14.7, 9.5, 5.1$  Hz, 2H), 2.64 – 2.46 (m, 2H), 1.98 – 1.67 (m, 6H), 1.51 – 1.38 (m, 2H), 0.93 (d,  $J = 6.7$  Hz, 3H), 0.88 (d,  $J = 6.8$  Hz, 3H).

$^{13}\text{C NMR}$  (151 MHz,  $\text{CDCl}_3$ )  $\delta$  149.02, 148.97, 146.20, 145.90, 142.51, 142.31, 129.65, 128.51, 128.48, 128.47, 128.45, 125.97, 125.96, 125.90, 125.10, 124.81, 120.64 (q,  $J = 256$  Hz), 119.95, 119.78, 119.38, 119.08, 118.08, 78.28, 39.79, 34.87, 33.79, 33.55, 33.41, 15.75, 14.14. 2 Carbons are missing due to overlapping.

$^{19}\text{F NMR}$  (376 MHz,  $\text{CDCl}_3$ )  $\delta$  -58.00, -58.01;

$\text{HRMS}$ :  $m/z$  (ESI): Calcd. for  $\text{C}_{18}\text{H}_{19}\text{F}_3\text{O}_2$  [ $\text{M}+\text{H}$ ]: 325.1407; found: 325.1415.

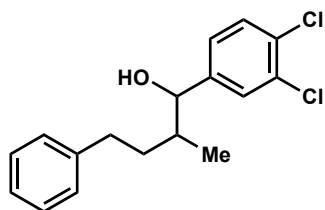

### 1-(3,4-dichlorophenyl)-2-methyl-4-phenylbutan-1-ol (29)

Following General Procedure II, a mixture of 3,4-dichlorobenzaldehyde (52.5 mg, 0.30 mmol, 1.5 equiv), and 4-phenyl-1-butene (24.0  $\mu\text{L}$ , 0.15 mmol, 1.0 equiv) was stirred for 24 h. Purification by flash column chromatography ( $\text{SiO}_2$ , 8:2 hexanes/EtOAc) furnished the title compound as clear, pale yellow oil (29.2 mg, 63% yield) as an inseparable 1:1 mixture of diastereomers.

$R_f$ : 0.30 (9:1 hexanes/EtOAc)

$^1\text{H NMR}$  (400 MHz,  $\text{CD}_2\text{Cl}_2$ )  $\delta$  7.52 – 7.44 (m, 2H), 7.43 – 7.37 (m, 2H), 7.30 – 7.20 (m, 7H), 7.20 – 7.11 (m, 5H), 4.59 (d,  $J = 5.2$  Hz, 1H), 4.47 (d,  $J = 6.4$  Hz, 1H), 2.73 (ddt,  $J = 19.1, 11.1, 5.2$  Hz, 2H), 2.62 – 2.46 (m, 2H), 1.99 – 1.66 (m, 6H), 1.51 – 1.37 (m, 2H), 0.93 (d,  $J = 6.7$  Hz, 3H), 0.87 (d,  $J = 6.8$  Hz, 3H).

$^{13}\text{C}$  NMR (126 MHz,  $\text{CDCl}_3$ )  $\delta$  146.13, 145.89, 142.56, 142.35, 130.67, 130.50, 129.93, 129.83, 129.56, 128.52, 128.51, 128.49, 128.48, 125.95, 125.89, 125.43, 125.11, 122.62, 122.61, 78.40, 77.29, 39.82, 39.78, 34.93, 33.87, 33.56, 33.42, 15.85, 14.23.

GC: (GC/MSD; HP-5MS UI; 139 Kpa; flow rate 2 mL/min; inlet temperature 250 °C; column temperature 50 °C for 0 min, then 20 °C/min to 100 °C, then 70 °C/min to 250 °C, then 5 °C/min to 280 °C):  $t_R$  = 8.090;

MS: (EI, 70 eV):  $m/z$  (%)  $\text{C}_{17}\text{H}_{18}\text{Cl}_2\text{O}$  calc. 308.07: 292.1 (2), 188.1 (32), 186.1 (49), 176.9 (52), 174.9 (82), 148.9 (9), 113.1 (10), 112 (6), 111 (31), 104 (7), 92 (27), 91 (100), 77 (9). Ion peak corresponds to M-OH.

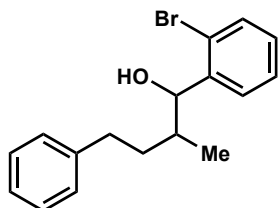

### 1-(2-bromophenyl)-2-methyl-4-phenylbutan-1-ol (30)

Following General Procedure **II**, a mixture of 2-bromobenzaldehyde (35.0  $\mu\text{L}$ , 0.30 mmol, 1.5 equiv), and 4-phenyl-1-butene (24.0  $\mu\text{L}$ , 0.15 mmol, 1.0 equiv.) was stirred for 24 h. Purification by flash column chromatography ( $\text{SiO}_2$ , 9:1 hexanes/EtOAc) furnished the title compound as clear, pale yellow oil (23.2 mg, 49% yield) as an inseparable 1.2:1 mixture of diastereomers.

$R_f$ : 0.25 (9:1 hexanes/EtOAc)

$^1\text{H}$  NMR (400 MHz,  $\text{CDCl}_3$ )  $\delta$  7.55 – 7.46 (m, 4H), 7.36 – 7.23 (m, 4H), 7.21 – 7.09 (m, 8H), 5.05 (d,  $J$  = 4.2 Hz, 1H), 4.94 (d,  $J$  = 6.1 Hz, 1H), 2.84 – 2.61 (m, 3H), 2.48 (ddd,  $J$  = 13.6, 10.6, 6.2 Hz, 1H), 2.04 – 1.76 (m, 5H), 1.72 – 1.52 (m, 3H), 0.99 (d,  $J$  = 6.8 Hz, 3H), 0.93 (d,  $J$  = 6.8 Hz, 3H).

$^{13}\text{C}$  NMR (126 MHz,  $\text{CDCl}_3$ )  $\delta$  142.86, 142.78, 142.57, 132.82, 128.88, 128.74, 128.53, 128.49, 128.46, 128.43, 128.40, 127.64, 127.39, 125.83, 125.76, 122.91, 122.37, 77.20, 75.90, 38.90, 37.71, 35.72, 33.66, 33.53, 32.85, 16.46, 13.28. 3 Peaks are missing due to overlapping.

HRMS:  $m/z$  (APCI): Calcd. for  $\text{C}_{17}\text{H}_{19}\text{BrO}$  for  $[\text{M} + \text{Na}]$ : 341.0517; found: 341.0521.

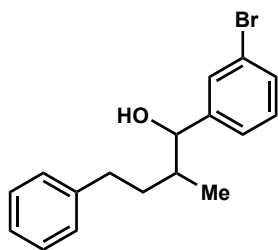

### 1-(3-bromophenyl)-2-methyl-4-phenylbutan-1-ol (31)

Following General Procedure **II**, a mixture of 3-bromobenzaldehyde (35.0  $\mu\text{L}$ , 0.30 mmol, 1.5 equiv), and 4-phenyl-1-butene (**19**) (24.0  $\mu\text{L}$ , 0.15 mmol, 1.0 equiv) was stirred for 24 h. Purification by flash column

chromatography (SiO<sub>2</sub>, 9:1 hexanes/EtOAc) furnished the title compound as clear, pale yellow oil (25.8 mg, 54% yield) as an inseparable 1.25:1 mixture of diastereomers.

*R<sub>f</sub>*: 0.25 (9:1 hexanes/EtOAc)

<sup>1</sup>H NMR (600 MHz, CDCl<sub>3</sub>) δ 7.39 (ddd, *J* = 8.2, 4.4, 2.6 Hz, 4H), 7.28 (td, *J* = 6.6, 5.8, 1.9 Hz, 4H), 7.21 – 7.07 (m, 8H), 4.58 (d, *J* = 5.1 Hz, 1H), 4.47 (d, *J* = 6.3 Hz, 1H), 2.74 (tdd, *J* = 14.4, 10.0, 5.3 Hz, 2H), 2.55 (dddd, *J* = 26.9, 13.7, 10.0, 6.6 Hz, 2H), 1.95 – 1.66 (m, 6H), 1.45 (dq, *J* = 12.4, 9.1, 6.4 Hz, 2H), 0.94 (d, *J* = 6.7 Hz, 3H), 0.88 (d, *J* = 6.8 Hz, 3H).

<sup>13</sup>C NMR (151 MHz, CDCl<sub>3</sub>) δ 144.00, 143.73, 142.39, 142.21, 132.47, 131.35, 131.17, 130.27, 128.73, 128.54, 128.50, 128.48, 128.46, 126.11, 126.01, 125.94, 125.82, 77.80, 76.67, 39.74, 39.72, 34.85, 33.69, 33.55, 33.38, 15.76, 14.07. 3 peaks are missing due to overlapping.

HRMS: *m/z* (APCI): Calcd. for C<sub>17</sub>H<sub>19</sub>BrO [M + Na]: 341.0517; found: 341.0521.

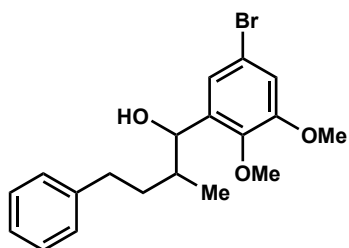

### 1-(5-bromo-2,3-dimethoxyphenyl)-2-methyl-4-phenylbutan-1-ol (**32**)

Following General Procedure II, a mixture of 5-bromo-2,3-dimethoxybenzaldehyde (39.9 mg, 0.30 mmol, 1.5 equiv), and 4-phenyl-1-butene (**19**) (24.0 μL, 0.15 mmol, 1.0 equiv) was stirred for 24 h. Purification by flash column chromatography (SiO<sub>2</sub>, 7:3 to 6:4 hexanes/EtOAc) furnished the title compound as clear oil (25.7 mg, 46% yield) as an inseparable 1.1:1 mixture of diastereomers.

*R<sub>f</sub>*: 0.2 (30% EtOAc in hexanes)

<sup>1</sup>H NMR (500 MHz, CDCl<sub>3</sub>) δ 7.29 – 7.23 (m, 4H), 7.20 – 7.12 (m, 6H), 7.06 (dd, *J* = 2.3, 0.6 Hz, 2H), 6.94 (t, *J* = 2.4 Hz, 2H), 4.79 (d, *J* = 5.8 Hz, 1H), 4.62 (d, *J* = 7.6 Hz, 1H), 3.85 (d, *J* = 2.8 Hz, 6H), 3.76 (s, 3H), 3.73 (s, 3H), 2.82 – 2.69 (m, 2H), 2.56 (dddd, *J* = 20.1, 13.7, 9.8, 6.8 Hz, 2H), 2.09 (dtd, *J* = 13.7, 6.8, 3.4 Hz, 2H), 1.90 – 1.77 (m, 2H), 1.69 (dddd, *J* = 13.5, 9.7, 6.9, 5.0 Hz, 2H), 1.57 – 1.45 (m, 2H), 0.99 (d, *J* = 6.7 Hz, 3H), 0.87 (d, *J* = 6.8 Hz, 3H).

<sup>13</sup>C NMR (126 MHz, CDCl<sub>3</sub>) δ 153.24, 153.21, 145.74, 145.40, 142.77, 142.48, 138.87, 138.68, 128.54, 128.51, 128.44, 128.43, 125.84, 125.78, 122.70, 122.46, 116.49, 116.44, 114.90, 114.81, 74.50, 73.31, 60.94, 60.84, 56.12, 39.38, 38.80, 35.37, 33.95, 33.46, 33.44, 16.42, 14.35; 1 carbon is missing due to overlap.

HRMS: *m/z* (ESI): Calcd. for C<sub>19</sub>H<sub>23</sub>BrO<sub>3</sub> [M+H]: 379.0909; found: 379.0912.

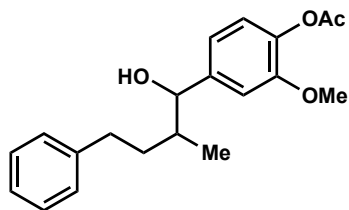

#### 4-(1-hydroxy-2-methyl-4-phenylbutyl)-2-methoxyphenyl acetate (33)

Following General Procedure II, a mixture of 4-formyl-2-methoxyphenyl acetate (58.2 mg, 0.30 mmol, 1.5 equiv), and 4-phenyl-1-butene (**19**) (24.0  $\mu$ L, 0.15 mmol, 1.0 equiv.) was stirred for 24 h. Purification by flash column chromatography (SiO<sub>2</sub>, 8:2 to 6:4 hexanes/EtOAc) furnished the title compound as clear oil (43.6 mg, 89% yield) as an inseparable 1.1:1 mixture of diastereomers.

*R<sub>f</sub>*: 0.2 (4:1 hexanes/EtOAc)

<sup>1</sup>H NMR (500 MHz, CDCl<sub>3</sub>)  $\delta$  7.31 – 7.23 (m, 4H), 7.20 – 7.15 (m, 4H), 7.14 – 7.11 (m, 2H), 6.98 (dd, *J* = 8.1, 2.8 Hz, 2H), 6.92 (dd, *J* = 22.9, 1.9 Hz, 2H), 6.87 – 6.81 (m, 2H), 4.55 (d, *J* = 5.7 Hz, 1H), 4.45 (d, *J* = 6.9 Hz, 1H), 3.82 (s, 3H), 3.79 (s, 3H), 2.81 – 2.67 (m, 2H), 2.61 – 2.51 (m, 2H), 2.31 (d, *J* = 1.2 Hz, 6H), 2.01 (dddd, *J* = 13.9, 10.4, 6.5, 3.4 Hz, 1H), 1.94 – 1.67 (m, 5H), 1.54 – 1.39 (m, 2H), 1.00 (d, *J* = 6.7 Hz, 3H), 0.88 (d, *J* = 6.8 Hz, 3H).

<sup>13</sup>C NMR (126 MHz, CDCl<sub>3</sub>)  $\delta$  169.21, 151.08, 142.82, 142.70, 142.62, 142.40, 139.04, 138.90, 128.49, 128.43, 125.84, 125.80, 122.43, 119.05, 118.78, 110.65, 110.41, 78.77, 77.80, 56.01, 39.82, 39.60, 34.87, 34.04, 33.46, 33.41, 20.81, 15.95, 14.50. 5 Peaks are missing due to overlap of the diastereomers.

HRMS: *m/z* (ESI): Calcd. for C<sub>20</sub>H<sub>24</sub>O<sub>4</sub> [M+H]: 329.1753; found: 329.1747.

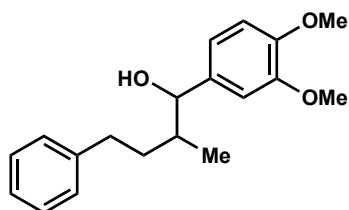

#### 1-(3,4-dimethoxyphenyl)-2-methyl-4-phenylbutan-1-ol (34)

Following General Procedure II, a mixture of 3,4-dimethoxybenzaldehyde (49.9 mg, 0.30 mmol, 1.5 equiv), and 4-phenyl-1-butene (**19**) (24.0  $\mu$ L, 0.15 mmol, 1.0 equiv) was stirred for 24 h. Purification by flash column chromatography (SiO<sub>2</sub>, 8:2 to 6:4 hexanes/EtOAc) furnished the title compound as clear oil (28.1 mg, 63% yield) as an inseparable 2.2:1 mixture of diastereomers.

*R<sub>f</sub>*: 0.2 (4:1 hexanes/EtOAc)

<sup>1</sup>H NMR (500 MHz, CDCl<sub>3</sub>)  $\delta$  7.29 – 7.22 (m, 4H), 7.20 – 7.13 (m, 2H), 7.12 – 7.08 (m, 2H), 6.85 – 6.79 (m, 4H), 4.47 (d, *J* = 6.4 Hz, 1H), 4.41 (d, *J* = 7.1 Hz, 0.45 H), 3.88 (d, *J* = 1.8 Hz, 6H), 3.85 (s, 3H), 2.73 (dddd, *J* = 32.9, 14.6, 9.2, 5.5 Hz, 2H), 2.55 (dddd, *J* = 20.5, 13.8, 10.1, 6.7 Hz, 2H), 2.07 – 1.97 (m, 0.55 H), 1.92 – 1.71 (m, 3H), 1.69 – 1.62 (m, 1H), 1.52 – 1.33 (m, 2H), 1.03 (d, *J* = 6.7 Hz, 3H), 0.84 (d, *J* = 6.8 Hz, 1.4 H).



$^{13}\text{C}$  NMR (126 MHz,  $\text{CDCl}_3$ )  $\delta$  149.06, 148.42, 142.53, 136.41, 128.51, 128.44, 128.40, 125.82, 118.95, 110.86, 109.44, 78.95, 78.36, 56.06, 55.98, 39.93, 39.67, 34.84, 34.38, 33.49, 33.45, 15.94, 14.97. 9 of the expected 10 aromatic peaks of the minor diastereomer are not observed.

HRMS:  $m/z$  (APCI): Calcd. for  $\text{C}_{19}\text{H}_{24}\text{O}_3$  [ $\text{M}+\text{Na}$ ]: 323.1623; found: 323.1619.

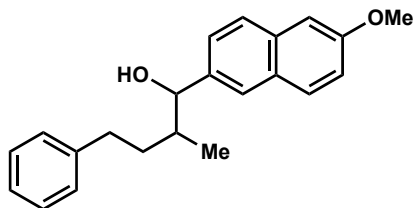

### 1-(6-methoxynaphthalen-2-yl)-2-methyl-4-phenylbutan-1-ol (35)

Following General Procedure II, a mixture of 6-methoxy-2-naphthaldehyde (55.9 mg, 0.30 mmol, 1.5 equiv), and 4-phenyl-1-butene (**19**) (24.0  $\mu\text{L}$ , 0.15 mmol, 1.0 equiv) was stirred for 24 h. Purification by flash column chromatography ( $\text{SiO}_2$ , 9:1 hexanes/EtOAc) furnished the title compound as clear oil (33.4 mg, 70% yield) as an inseparable 2.5:1 mixture of diastereomers.

$R_f$ : 0.3 (9:1 hexanes/EtOAc)

$^1\text{H}$  NMR (500 MHz,  $\text{CDCl}_3$ )  $\delta$  7.74 – 7.64 (m, 4H), 7.41 (dd,  $J = 8.5, 1.8$  Hz, 0.4 H), 7.36 (dd,  $J = 8.5, 1.8$  Hz, 1H), 7.30 – 7.21 (m, 2H), 7.20 – 7.07 (m, 7H), 4.70 (d,  $J = 5.9$  Hz, 1H), 4.60 (d,  $J = 6.9$  Hz, 0.4 H), 3.93 (d,  $J = 1.0$  Hz, 4H), 2.75 (dddd,  $J = 29.3, 13.8, 10.4, 5.2$  Hz, 1.5H), 2.57 (tdd,  $J = 13.7, 10.2, 6.4$  Hz, 1.5H), 2.11 – 1.84 (m, 3.7H), 1.79 – 1.70 (m, 1H), 1.56 – 1.37 (m, 2.7H), 1.04 (d,  $J = 6.7$  Hz, 3H), 0.88 (d,  $J = 6.8$  Hz, 1.2H).

$^{13}\text{C}$  NMR (126 MHz,  $\text{CDCl}_3$ )  $\delta$  157.74, 142.82, 142.57, 138.85, 134.21, 134.11, 129.55, 128.75, 128.53, 128.49, 128.43, 128.41, 127.00, 126.98, 125.81, 125.79, 125.57, 125.35, 125.21, 119.04, 119.02, 105.79, 79.23, 78.39, 55.45, 39.81, 39.70, 35.02, 34.33, 33.59, 33.52, 15.96, 14.75. 3 Peaks from the aromatic section and the MeO-peak from the minor diastereomer are not observed due to overlap.

HRMS:  $m/z$  (ESI): Calcd. for  $\text{C}_{20}\text{H}_{24}\text{O}$  [ $\text{M}+\text{H}$ ]: 321.1855; found: 321.1853.

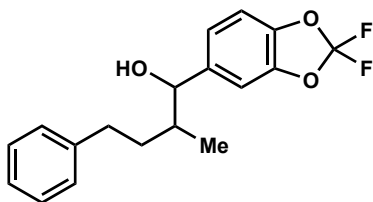

### 1-(2,2-difluorobenzo[d][1,3]dioxol-5-yl)-2-methyl-4-phenylbutan-1-ol (36)

The General Procedure II was followed in a 0.15 mmol scale using 4-phenyl-1-butene as the olefin (23  $\mu\text{L}$ , 0.15 mmol) and 2,2-difluoro-1,3-benzodioxole-5-carbaldehyde as the aldehyde (55 mg, 0.3 mmol). Purification by flash column chromatography ( $\text{SiO}_2$ , hexanes hexanes then 9:1 hexanes/EtOAc) delivered 34 mg of the desired compound (71%) as an oil and a 1:1.1 mixture of diastereomers.

$R_f$ : 0.19 (9:1 hexanes/EtOAc)

$^1\text{H NMR}$  (600 MHz,  $\text{CDCl}_3$ )  $\delta$  7.30 – 7.24 (m, 4H), 7.21 – 7.14 (m, 4H), 7.14 – 7.10 (m, 2H), 7.06 – 7.04 (m, 1H), 7.02 (d,  $J = 1.6$  Hz, 1H), 7.01 – 6.94 (m, 4H), 4.57 (dd,  $J = 5.7, 2.8$  Hz, 1H), 4.47 (dd,  $J = 6.8, 2.6$  Hz, 1H), 2.74 (dddd,  $J = 21.9, 13.7, 10.2, 5.3$  Hz, 2H), 2.55 (dddd,  $J = 14.0, 10.1, 6.6, 4.9$  Hz, 2H), 1.94 (dddd,  $J = 13.7, 10.3, 6.7, 3.5$  Hz, 1H), 1.88 – 1.74 (m, 2H), 1.70 (dddd,  $J = 13.5, 10.0, 6.7, 4.6$  Hz, 1H), 1.49 – 1.38 (m, 2H), 0.97 (d,  $J = 6.8$  Hz, 3H), 0.86 (d,  $J = 6.8$  Hz, 3H).

$^{13}\text{C NMR}$  (151 MHz,  $\text{CDCl}_3$ )  $\delta$  143.98, 143.08, 142.96, 142.50, 142.28, 140.06, 139.86, 131.75 (t,  $J = 254.3$  Hz), 128.51, 128.50, 128.47, 125.99, 125.93, 121.94, 121.65, 109.00, 108.99, 108.02, 107.84, 78.53, 77.56, 40.00, 39.95, 34.82, 33.98, 33.54, 33.41, 15.76, 14.38.

The diastereomers overlap at 143.98 ppm.

$^{19}\text{F NMR}$  (376 MHz,  $\text{CDCl}_3$ )  $\delta$  -50.18, -50.20.

**HRMS:**  $m/z$  (APCI): Calcd. for  $\text{C}_{18}\text{H}_{18}\text{F}_2\text{O}_3$  [ $\text{M} - \text{H}_2 + \text{H}$ ] 319.1146; found: 319.1147  
Dehydrogenation seem to occur under the APCI conditions.

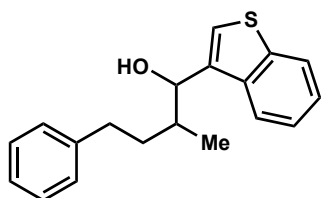

**1-(benzo[*b*]thiophen-3-yl)-2-methyl-4-phenylbutan-1-ol (37)**

Following General Procedure II, a mixture of benzo[*b*]thiophene-3-carbaldehyde (48.7 mg, 0.30 mmol, 1.5 equiv), and 4-phenyl-1-butene (**19**) (24.0  $\mu\text{L}$ , 0.15 mmol, 1.0 equiv) was stirred for 24 h. Purification by flash column chromatography ( $\text{SiO}_2$ , 9:1 hexanes/EtOAc) furnished the title compound as clear, pale yellow oil (29.8 mg, 68% yield) as an inseparable 1.3:1 mixture of diastereomers.

$R_f$ : 0.3 (9:1 hexanes/EtOAc)

$^1\text{H NMR}$  (500 MHz,  $\text{CDCl}_3$ )  $\delta$  7.89 – 7.83 (m, 2H), 7.68 – 7.63 (m, 1H), 7.38 – 7.29 (m, 5H), 7.29 – 7.22 (m, 5H), 7.20 – 7.13 (m, 5H), 5.04 (d,  $J = 5.2$  Hz, 1H), 4.90 (d,  $J = 6.7$  Hz, 1H), 2.77 (dddd,  $J = 13.1, 10.5, 5.4, 2.9$  Hz, 2H), 2.63 (ddd,  $J = 13.9, 9.7, 6.7$  Hz, 1H), 2.53 (ddd,  $J = 13.7, 10.4, 6.4$  Hz, 1H), 2.20 – 2.03 (m, 3H), 1.93 – 1.77 (m, 2H), 1.68 – 1.49 (m, 3H), 1.02 (d,  $J = 6.7$  Hz, 3H), 0.97 (d,  $J = 6.8$  Hz, 3H).

$^{13}\text{C NMR}$  (126 MHz,  $\text{CDCl}_3$ )  $\delta$  142.70, 142.35, 141.05, 139.10, 139.05, 137.39, 134.73, 128.52, 128.50, 128.41, 125.92, 125.79, 124.50, 124.45, 124.08, 124.06, 123.08, 123.05, 122.72, 122.60, 122.36, 74.93, 73.70, 38.59, 37.86, 35.39, 33.79, 33.60, 33.51, 16.70, 14.41. 3 Peaks in the aromatic part are not visible from the minor diastereomer due to overlap.

**HRMS:**  $m/z$  (APCI): Calcd. for  $\text{C}_{19}\text{H}_{20}\text{OS}$  [ $\text{M} - \text{OH}$ ]: 279.1207; found: 279.1211.

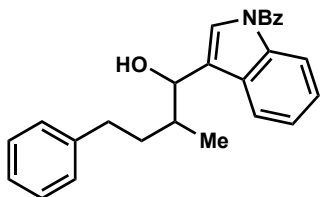

**(3-(1-hydroxy-2-methyl-4-phenylbutyl)-1H-indol-1-yl)(phenyl)methanone (38)**

The General Procedure II was followed in a 0.15 mmol scale using 4-phenyl-1-butene as the olefin (23  $\mu$ L, 0.15 mmol) and 1-benzoyl-1H-indole-3-carbaldehyde as the aldehyde (60 mg, 0.24 mmol). Purification by flash column chromatography (SiO<sub>2</sub>, 4:1 hexanes/EtOAc) then further purification by PTLC (100% DCM) delivered 26 mg of the desired compound (46 %) as a clear oil and a 1:1.4 mixture of diastereomers. (Purification by PTLC was necessary to get rid of left over aldehyde).

*R<sub>f</sub>*: 0.26 (4:1 hexanes/EtOAc)

<sup>1</sup>H NMR (600 MHz, CDCl<sub>3</sub>)  $\delta$  8.40 (dd, *J* = 8.4, 1.6 Hz, 2H), 7.71 (td, *J* = 7.6, 7.1, 1.4 Hz, 5H), 7.66 (dt, *J* = 7.9, 1.0 Hz, 1H), 7.65 – 7.58 (m, 2H), 7.55 – 7.45 (m, 6H), 7.39 (dddd, *J* = 8.5, 7.2, 5.8, 1.3 Hz, 2H), 7.34 – 7.29 (m, 2H), 7.25 – 7.20 (m, 6H), 7.20 – 7.08 (m, 7H), 4.89 (d, *J* = 5.3 Hz, 1H), 4.76 (d, *J* = 6.7 Hz, 1H), 2.76 (ddt, *J* = 13.8, 10.0, 5.2 Hz, 2H), 2.62 (ddd, *J* = 13.9, 9.7, 6.7 Hz, 1H), 2.55 (ddd, *J* = 13.7, 10.4, 6.4 Hz, 1H), 2.12 (dtd, *J* = 13.1, 6.7, 6.0, 3.3 Hz, 1H), 2.09 – 2.00 (m, 2H), 1.82 (dddd, *J* = 13.5, 9.9, 6.7, 4.9 Hz, 2H), 1.54 – 1.45 (m, 1H), 1.02 (d, *J* = 6.7 Hz, 3H), 0.98 (d, *J* = 6.8 Hz, 4H).

<sup>13</sup>C NMR (151 MHz, CDCl<sub>3</sub>)  $\delta$  168.72, 142.62, 142.30, 136.83, 134.71, 134.70, 132.09, 132.05, 129.31, 129.25, 129.13, 128.81, 128.79, 128.50, 128.48, 128.47, 128.45, 125.95, 125.86, 125.36, 125.33, 124.87, 124.71, 124.66, 124.43, 123.98, 123.95, 120.27, 119.95, 116.74, 116.73, 72.98, 71.93, 38.59, 38.00, 35.18, 33.94, 33.54, 33.49, 16.45, 14.52.

The diastereomers overlap at 168.72, 136.83, and 129.30.

HRMS: *m/z* (ESI): Calcd. for C<sub>26</sub>H<sub>25</sub>NO<sub>2</sub> [M+H]: 384.1964; found: 384.1963.

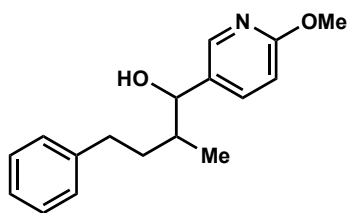

**1-(6-methoxypyridin-3-yl)-2-methyl-4-phenylbutan-1-ol (39)**

The General Procedure II was followed in a 0.15 mmol scale using 4-phenyl-1-butene as the olefin (23  $\mu$ L, 0.15 mmol) and 6-methoxy-3-pyridinecarboxaldehyde as the aldehyde (40 mg, 0.3 mmol). Purification by flash column chromatography (SiO<sub>2</sub>, hexanes then 4:1 hexanes/EtOAc) delivered 37 mg of the desired compound (90%) as a clear oil and a 1:1.3 mixture of diastereomers.

*R<sub>f</sub>*: 0.29 (4:1 hexanes/EtOAc)

<sup>1</sup>H NMR (600 MHz, CDCl<sub>3</sub>)  $\delta$  8.04 (t, *J* = 2.8 Hz, 2H), 7.55 (dd, *J* = 8.6, 2.4 Hz, 1H), 7.50 (dd, *J* = 8.6, 2.4 Hz, 1H), 7.32 – 7.22 (m, 4H), 7.22 – 7.14 (m, 4H), 7.14 – 7.06 (m, 2H), 6.72 (dd, *J* = 10.4, 8.5 Hz, 2H), 4.52 (d, *J* = 6.1 Hz, 1H), 4.45 (d, *J* = 7.0 Hz, 1H), 3.93 (s, 3H), 3.92 (s, 3H), 2.73 (dddd, *J* = 33.9, 13.8, 10.3, 5.2 Hz, 2H), 2.55 (dddd, *J* = 20.4, 13.7, 10.1, 6.5 Hz, 2H), 2.03 – 1.77 (m, 5H), 1.68 (dtd, *J* = 14.1, 7.0, 4.1 Hz, 2H), 1.53 – 1.33 (m, 2H), 1.01 (d, *J* = 6.7 Hz, 3H), 0.84 (d, *J* = 6.8 Hz, 3H).

$^{13}\text{C}$  NMR (151 MHz,  $\text{CDCl}_3$ )  $\delta$  163.93, 163.83, 145.38, 145.20, 142.59, 142.34, 137.28, 137.13, 131.56, 131.44, 128.50, 128.48, 128.47, 128.46, 125.92, 125.88, 110.84, 110.77, 76.43, 75.87, 53.58, 39.70, 39.61, 34.59, 34.36, 33.47, 33.40, 15.54, 14.77.

The diastereomers from the Me-from the 2-Methoxy seem to be overlapping.

HRMS:  $m/z$  (ESI): Calcd. for  $\text{C}_{17}\text{H}_{21}\text{NO}_2$   $[\text{M}+\text{H}]$ : 272.1651; found: 272.1656.

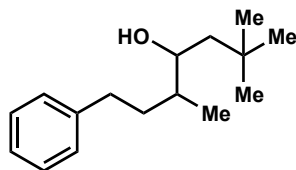

### 3,6,6-trimethyl-1-phenylheptan-4-ol (40)

The General Procedure IV was followed in a 0.3 mmol scale using 4-phenyl-1-butene as the olefin (46  $\mu\text{L}$ , 0.15 mmol) and 3,3-dimethyl-butyraldehyde as the aldehyde (75  $\mu\text{L}$ , 0.6 mmol). Purification by flash column chromatography ( $\text{SiO}_2$ , hexanes then 9:1 hexanes/ $\text{Et}_2\text{O}$ ) delivered 59 mg of the desired compound (84%) as a pale yellow oil and a 1:1.2 mixture of diastereomers.

$R_f$ : 0.42 (9:1 hexanes/ $\text{EtOAc}$ )

$^1\text{H}$  NMR (600 MHz,  $\text{CDCl}_3$ )  $\delta$  7.28 (m, 5H), 7.22 – 7.15 (m, 7H), 3.72 (dt,  $J = 8.3, 2.7$  Hz, 1H), 3.66 (dd,  $J = 8.1, 3.8$  Hz, 1H), 2.73 (tdd,  $J = 12.8, 10.4, 5.2$  Hz, 2H), 2.57 (dddd,  $J = 30.1, 13.6, 9.9, 6.4$  Hz, 2H), 1.86 – 1.77 (m, 1H), 1.50 – 1.38 (m, 4H), 1.38 – 1.20 (m, 7H), 0.99 – 0.90 (m, 27H). 57 total hydrogens probably due to the mixture of diastereomers (1 diastereomer = 26 H,  $1.2 \times 26 = 31.2$ ,  $31 + 26 = 57\text{H}$ )

$^{13}\text{C}$  NMR (151 MHz,  $\text{CDCl}_3$ )  $\delta$  142.87, 142.84, 128.50, 128.47, 128.46, 125.86, 125.82, 73.20, 72.47, 48.48, 47.29, 40.09, 40.05, 34.86, 34.07, 33.92, 33.88, 30.36, 30.28, 30.27, 30.23, 14.94, 13.97.

The diastereomers overlap at 128.47

HRMS:  $m/z$  (APCI): Calcd. for  $\text{C}_{16}\text{H}_{26}\text{O}$   $[\text{M} + \text{Na}]$ : 257.1881; found: 257.1882.

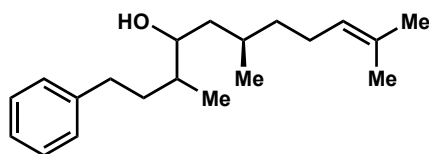

### (6R)-3,6,10-trimethyl-1-phenylundec-9-en-4-ol (41)

The General Procedure II was followed in a 0.15 mmol scale using 4-phenyl-1-butene as the olefin (23  $\mu\text{L}$ , 0.15 mmol) and (-)-citronellal, as the aldehyde (54  $\mu\text{L}$ , 0.3 mmol). Purification by flash column chromatography ( $\text{SiO}_2$ , hexanes then 9:1 hexanes/ $\text{EtOAc}$ ) delivered 27 mg of the desired compound (62%) as a pale yellow oil and an inseparable 1:1:1:1 mixture of diastereomers.

$R_f$ : 0.51 (4:1 Hexanes/ $\text{EtOAc}$ )

$^1\text{H}$  NMR (600 MHz,  $\text{CDCl}_3$ )  $\delta$  7.35 – 7.29 (m, 10H), 7.24 – 7.16 (m, 10H), 5.12 (dddd,  $J = 8.5, 5.8, 2.8, 1.4$  Hz, 4H), 3.69 (t,  $J = 13.0$  Hz, 2H), 3.60 (d,  $J = 9.3$  Hz, 2H), 2.81 – 2.69 (m, 4H), 2.66 – 2.52 (m, 4H), 2.06 – 1.90 (m, 8H), 1.78 (dddd,  $J = 14.2, 10.5, 6.6, 3.3$  Hz, 4H), 1.71 (dd,  $J = 2.9, 1.6$  Hz, 12H), 1.63 (s, 12H), 1.49 – 1.27 (m, 18H), 1.24 – 1.07 (m, 10H), 1.05 – 0.84 (m, 24H).

$^{13}\text{C}$  NMR (151 MHz,  $\text{CDCl}_3$ )  $\delta$  142.25, 142.24, 142.23, 130.82, 130.76, 127.90, 127.87, 125.25, 125.23, 124.34, 124.32, 73.32, 72.84, 72.30, 72.13, 41.44, 41.19, 40.58, 40.08, 38.53, 38.14, 38.09, 37.76, 37.56, 37.41, 36.08, 35.74, 34.76, 34.60, 33.60, 33.29, 33.26, 33.20, 33.10, 29.02, 28.95, 28.64, 28.52, 25.27, 25.09, 25.05, 24.92, 20.20, 20.00, 18.66, 18.55, 17.21, 14.78, 14.56, 13.39, 12.93.

Diastereomer 1:

GC: (GC/MSD; HP-5MS UI; 139 Kpa; flow rate 2 mL/min; inlet temperature 250 °C; column temperature 50 °C for 0 min, then 20 °C/min to 100 °C, then 30°C/min to 280 °C):  $t_R$  = 8.040 min;

MS: (EI, 70 eV):  $m/z$  (%): 270.2 (2), 207.0 (10), 184.2 (6), 155.1 (5), 145.1 (13), 137.2 (6), 131.1 (16), 13.1 (14), 109.1 (50), 104.0 (23), 91.1 (100), 81.1 (31), 69.1 (47), 55.1 (20).

Diastereomer 2:

GC: (GC/MSD; HP-5MS UI; 139 Kpa; flow rate 2 mL/min; inlet temperature 250 °C; column temperature 50 °C for 0 min, then 20 °C/min to 100 °C, then 30°C/min to 280 °C):  $t_R$  = 8.069 min;

MS: (EI, 70 eV):  $m/z$  (%): 270.2 (2), 203.1 (2), 195.2 (3), 157.1 (5), 145.1 (12), 131.1 (16), 123.1 (17), 109.1 (50), 91.1 (100), 82.1 (43), 69.1 (47), 55.1 (21).

Diastereomer 3:

GC: (GC/MSD; HP-5MS UI; 139 Kpa; flow rate 2 mL/min; inlet temperature 250 °C; column temperature 50 °C for 0 min, then 20 °C/min to 100 °C, then 30°C/min to 280 °C):  $t_R$  = 8.097 min;

MS: (EI, 70 eV):  $m/z$  (%): 270.2 (2), 207.1 (5), 145.1 (12), 123.1 (17), 109.1 (50), 91.1 (100), 81.1 (26), 69.1 (45), 55.1 (20).

HRMS:  $m/z$  (ESI): Calcd. for  $\text{C}_{20}\text{H}_{32}\text{O}$  [M + H]: 289.2531; found: 289.2525

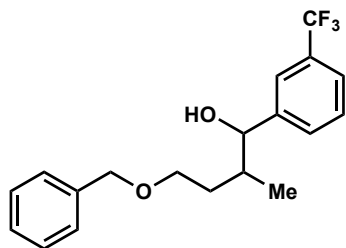

#### 4-(benzyloxy)-2-methyl-1-(3-(trifluoromethyl)phenyl)butan-1-ol (42)

The General Procedure IV was followed in a 0.15 mmol scale using 24 mg of ((but-3-en-1-yl)oxy)methyl)benzene as the olefin and 34  $\mu\text{L}$  of 3-(trifluoromethyl)benzaldehyde as the aldehyde (0.3 mmol). Purification by flash column chromatography ( $\text{SiO}_2$  hexanes then 9:1 hexanes/ $\text{Et}_2\text{O}$ ) delivered 30 mg of the desired compound (59%) as a clear oil and a 1:1.3 mixture of diastereomers.

$R_f$ : 0.38 (4:1 hexanes/ $\text{EtOAc}$ )

$^1\text{H}$  NMR (600 MHz,  $\text{CDCl}_3$ )  $\delta$  7.62 – 7.57 (m, 2H), 7.50 (ddd,  $J$  = 9.4, 7.6, 3.8 Hz, 4H), 7.43 (t,  $J$  = 7.7 Hz, 2H), 7.38 – 7.32 (m, 8H), 7.30 (ddt,  $J$  = 8.5, 5.8, 2.2 Hz, 2H), 4.80 – 4.75 (m, 1H), 4.54 (s, 4H), 4.48 (dd,  $J$  = 7.2, 2.5 Hz, 1H), 3.67 – 3.57 (m, 4H), 3.54 (dddd,  $J$  = 9.5, 7.6, 6.5, 4.5 Hz, 2H), 2.08 – 1.99 (m, 2H), 1.85 – 1.75 (m, 2H), 1.69 – 1.59 (m, 2H), 0.83 (d,  $J$  = 7.0 Hz, 3H), 0.80 (d,  $J$  = 7.0 Hz, 3H).

$^{13}\text{C}$  NMR (151 MHz,  $\text{CDCl}_3$ )  $\delta$  145.01, 144.66, 137.94, 137.83, 130.62 (q,  $J$  = 32.4 Hz), 130.49 (q,  $J$  = 32.4 Hz), 130.25 (d,  $J$  = 1.2 Hz), 129.76 (d,  $J$  = 1.2 Hz), 128.67, 128.65, 128.54, 128.00, 127.98, 127.96, 124.36 (q,  $J$  = 272.3 Hz), 124.18 (q,  $J$  = 3.8 Hz), 123.86 (q,  $J$  = 3.8 Hz), 123.62 (q,  $J$  = 3.8 Hz), 123.19 (q,  $J$  = 3.8 Hz), 78.37, 76.21, 73.43, 73.41, 68.18, 68.08, 38.99, 38.36, 33.60, 32.58, 17.02, 13.33.

The diastereomers overlap at 128.65, 127.98, and 124.36.

$^{19}\text{F}$  NMR (376 MHz,  $\text{CDCl}_3$ )  $\delta$  -62.71, -62.73.

HRMS:  $m/z$  (APCI): Calcd. for  $\text{C}_{19}\text{H}_{21}\text{F}_3\text{O}_2$  [ $\text{M} + \text{Na}$ ]: 361.1391; found: 361.1382

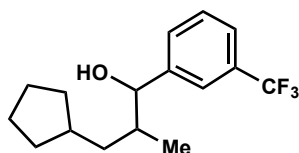

### 3-cyclopentyl-2-methyl-1-(3-(trifluoromethyl)phenyl)propan-1-ol (43)

The General Procedure IV was followed in a 0.15 mmol scale using allylcyclopentane as the olefin (21  $\mu\text{L}$ , 0.15 mmol) and 3-(trifluoromethyl)benzaldehyde as the aldehyde (36  $\mu\text{L}$ , 0.27 mmol). Purification by FCC (hexanes then 9:1 hexanes: $\text{Et}_2\text{O}$ ) delivered 20 mg of the desired compound (47% IY) as a pale yellow oil and as a 1:1.4 mixture of diastereomers.

$R_f$ : 0.43 (4:1 hexanes/ $\text{EtOAc}$ )

$^1\text{H}$  NMR (600 MHz,  $\text{CDCl}_3$ )  $\delta$  7.58 (bs,  $J = 2.6$  Hz, 2H), 7.55 – 7.48 (m, 5H), 7.45 (t,  $J = 7.6$  Hz, 2H), 4.66 (dd,  $J = 5.0, 2.8$  Hz, 1H), 4.54 (dd,  $J = 6.3, 2.5$  Hz, 1H), 1.94 – 1.80 (m, 5H), 1.80 – 1.69 (m, 5H), 1.64 – 1.54 (m, 5H), 1.54 – 1.42 (m, 5H), 1.34 – 1.17 (m, 6H), 1.13 – 1.03 (m, 2H), 0.97 (dq,  $J = 11.8, 8.3, 5.6$  Hz, 2H), 0.87 (d,  $J = 6.8$  Hz, 3H), 0.81 (d,  $J = 6.8$  Hz, 4H). 48 H total due to 1:1.4 mixture of diastereomers.

$^{13}\text{C}$  NMR (151 MHz,  $\text{CDCl}_3$ )  $\delta$  144.99, 144.50, 130.63 (q,  $J = 32.2$  Hz), 130.17 (d,  $J = 1.1$  Hz), 129.79 (d,  $J = 1.0$  Hz), 128.69, 128.67, 124.35 (q,  $J = 272.4$  Hz), 124.35 (q,  $J = 272.4$  Hz), 124.29 (q,  $J = 3.9$  Hz), 124.09 (q,  $J = 3.9$  Hz), 123.57, (q,  $J = 3.9$  Hz), 123.22 (q,  $J = 3.9$  Hz), 78.80, 76.95, 39.80, 39.43, 39.40, 38.47, 37.65, 37.62, 33.88, 33.48, 32.45, 32.15, 25.22, 25.21, 25.19, 15.84, 14.02.

The diastereomers overlap at 28.21 and at 130.63.

$^{19}\text{F}$  NMR (376 MHz,  $\text{CDCl}_3$ )  $\delta$  -62.77, -62.78.

Both diastereomers overlap:

GC: (GC/MSD; HP-5MS UI; 139 Kpa; flow rate 2 mL/min; inlet temperature 250  $^\circ\text{C}$ ; column temperature 50  $^\circ\text{C}$  for 0 min, then 20  $^\circ\text{C}/\text{min}$  to 100  $^\circ\text{C}$ , then 30 $^\circ\text{C}/\text{min}$  to 280  $^\circ\text{C}$ ):  $t_R = 6.650$  min;

MS: (EI, 70 eV):  $m/z$  (%): 268.1 (2), 202.0 (10), 186.1 (11), 175.0 (100), 145.0 (11), 127.0 (38), 111.1 (52), 69.1 (68), 55.1 (20).

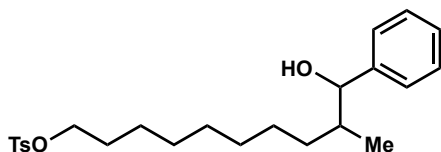

### 10-hydroxy-9-methyl-10-phenyldecyl 4-methylbenzenesulfonate (44)

The General Procedure II was followed in a 0.15 mmol scale using dec-9-en-1-yl 4-methylbenzenesulfonate (47 mg, 0.15 mmol) as the olefin and benzaldehyde as the aldehyde (30  $\mu\text{L}$ , 0.3 mmol). Purification by FCC (hexanes then 9:1 hexanes: $\text{EtOAc}$  then 4:1 hexanes: $\text{EtOAc}$ ) the preparative TLC (100% DCM) delivered 48 mg of the desired compound (76% IY) as a pale yellow oil and a 1:1.3 mixture of diastereomers. (preparative TLC was necessary to get rid of left over alcohol that overlapped with the compound).

*R<sub>f</sub>*: 0.21 (4:1 hexanes/EtOAc)

<sup>1</sup>H NMR (600 MHz, CD<sub>2</sub>Cl<sub>2</sub>) δ 7.79 – 7.74 (m, 4H), 7.37 (ddd, *J* = 8.5, 2.8, 0.9 Hz, 5H), 7.35 – 7.28 (m, 9H), 7.25 (tdd, *J* = 8.5, 4.5, 2.7 Hz, 2H), 4.52 (d, *J* = 5.7 Hz, 1H), 4.42 (d, *J* = 6.9 Hz, 1H), 3.99 (td, *J* = 6.6, 4.3 Hz, 4H), 2.44 (s, 4H), 2.44 (s, 3H), 1.86 – 1.69 (m, 2H), 1.65 – 1.54 (m, 6H), 1.41 – 1.03 (m, 22H), 0.88 (d, *J* = 6.8 Hz, 3H), 0.74 (d, *J* = 6.8 Hz, 3H).

<sup>13</sup>C NMR (151 MHz, CD<sub>2</sub>Cl<sub>2</sub>) δ 145.45, 144.79, 144.47, 133.75, 130.39, 128.59, 128.34, 127.76, 127.59, 127.23, 126.90, 79.33, 78.41, 71.45, 71.43, 40.79, 40.72, 33.70, 32.58, 30.32, 30.16, 29.90, 29.84, 29.43, 29.39, 29.32, 27.63, 27.47, 25.84, 25.83, 21.92, 16.05, 14.59.

HRMS: *m/z* (APCI): Calcd. for C<sub>24</sub>H<sub>34</sub>O<sub>4</sub>S [M + Na] 441.2075; found: 441.2071.

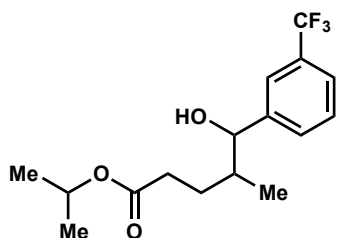

**isopropyl 5-hydroxy-4-methyl-5-(3-(trifluoromethyl)phenyl)pentanoate (45)**

The general procedure **IV** was followed on a 0.1 mmol scale using isopropyl pent-4-enoate as the olefin (14 mg, 0.1 mmol) and 3-trifluoromethylbenzaldehyde as the aldehyde (27 μL, 0.2 mmol). Purification by PTLC (4:1 hexanes/EtOAc) delivered 21 mg of the desired compound as a clear oil and a 1:1 mixture of diastereomers.

*R<sub>f</sub>*: 0.31 (4:1 hexanes/EtOAc)

<sup>1</sup>H NMR (600 MHz, CDCl<sub>3</sub>) δ 7.58 (d, *J* = 2.5 Hz, 2H), 7.51 (dt, *J* = 12.7, 7.1 Hz, 4H), 7.45 (t, *J* = 7.6 Hz, 2H), 5.00 (hept, *J* = 6.3 Hz, 2H), 4.69 (d, *J* = 2.6 Hz, 1H), 4.49 (d, *J* = 7.1 Hz, 1H), 2.44 – 2.33 (m, 2H), 2.33 – 2.21 (m, 2H), 1.97 (dddd, *J* = 13.8, 8.6, 7.2, 3.7 Hz, 1H), 1.89 – 1.76 (m, 3H), 1.56 – 1.43 (m, 2H), 1.22 (d, *J* = 2.7 Hz, 6H), 1.21 (d, *J* = 2.7 Hz, 6H), 0.85 (d, *J* = 6.6 Hz, 3H), 0.78 (d, *J* = 6.8 Hz, 3H).

<sup>13</sup>C NMR (151 MHz, CDCl<sub>3</sub>) δ 173.69, 173.62, 144.50, 144.44, 130.19, 129.72, 128.84, 128.75, 124.50 (q, *J* = 4.3 Hz), 124.17 (q, *J* = 4.2 Hz), 123.57 (q, *J* = 3.8 Hz), 123.12 (q, *J* = 3.8 Hz), 78.32, 76.30, 67.98, 67.89, 40.02, 39.96, 32.56, 32.19, 28.24, 27.31, 21.96, 21.94, 15.85, 13.67.

Diastereomer 1:

**GC**: GC/MSD (HP-5MS UI; 139 Kpa; flow rate 2 mL/min; inlet temperature 250 °C; column temperature 50 °C for 0 min, then 20 °C/min to 100 °C, then 30°C/min to 280 °C): *t<sub>R</sub>* = 6.501 min;

**MS**: (EI, 70 eV): *m/z* (%): 316.1 (0.02), 258.1 (21), 239.1 (19), 186.1 (15), 172.0 (27), 145.0 (27), 127.0 (12), 117.1 (26), 84.0 (40), 56.0 (100).

Diastereomer 2:

**GC**: GC/MSD (HP-5MS UI; 139 Kpa; flow rate 2 mL/min; inlet temperature 250 °C; column temperature 50 °C for 0 min, then 20 °C/min to 100 °C, then 30°C/min to 280 °C): *t<sub>R</sub>* = 6.541 min;

**MS**: (EI, 70 eV): *m/z* (%): 258.1 (26), 239.1 (23), 186.0 (6), 172.0 (25), 145.0 (30), 127.0 (14), 117.1 (12), 84.0 (40), 56.0 (100).

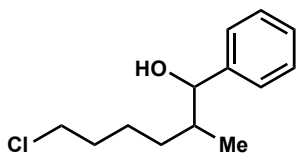

**6-chloro-2-methyl-1-phenylhexan-1-ol (46)**

The General Procedure **II** was followed in a 0.15 mmol scale using 5-chloropent-1-ene as the olefin (16 mg, 0.15 mmol) and benzaldehyde as the aldehyde (30  $\mu$ L, 0.3 mmol). Purification by FCC (hexanes then 9:1 hexanes/Et<sub>2</sub>O) delivered 29 mg of the desired compound (86%) as a pale yellow oil and a 1:1.1 mixture of diastereomers.

*R<sub>f</sub>*: 0.5 (4:1 hexanes/EtOAc)

<sup>1</sup>H NMR (600 MHz, CDCl<sub>3</sub>)  $\delta$  7.37 – 7.32 (m, 4H), 7.32 – 7.29 (m, 4H), 7.29 – 7.26 (m, 2H), 4.53 (d, *J* = 5.8 Hz, 1H), 4.43 (d, *J* = 7.0 Hz, 1H), 3.53 (td, *J* = 6.7, 1.0 Hz, 2H), 3.49 (td, *J* = 6.7, 1.3 Hz, 2H), 1.88 – 1.64 (m, 10H), 1.63 – 1.47 (m, 2H), 1.38 (ttdd, *J* = 13.6, 10.3, 8.7, 5.4 Hz, 2H), 1.24 – 1.14 (m, 1H), 1.15 – 1.05 (m, 1H), 0.94 (d, *J* = 6.7 Hz, 3H), 0.77 (d, *J* = 6.8 Hz, 3H).

<sup>13</sup>C NMR (151 MHz, CDCl<sub>3</sub>)  $\delta$  143.77, 143.61, 128.39, 128.37, 127.66, 127.49, 126.77, 126.48, 79.09, 78.25, 45.24, 45.16, 40.19, 40.12, 32.99, 32.85, 32.41, 31.51, 24.61, 24.44, 15.84, 14.53.

**HRMS**: *m/z* (APCI): Calcd. for C<sub>13</sub>H<sub>19</sub>ClO [*M* – H<sub>2</sub> + H]: 225.1046; found: 225.1051.

Dehydrogenation of the alcohol to the ketone seems to occur under the APCI conditions.

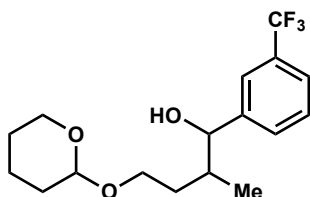

**2-methyl-4-((tetrahydro-2H-pyran-2-yl)oxy)-1-(3-(trifluoromethyl)phenyl)butan-1-ol (47)**

Following General Procedure **II**, a mixture of 3-trifluorobenzaldehyde (36.0  $\mu$ L, 0.30 mmol, 1.5 equiv), and 2-(but-3-en-1-yloxy)tetrahydro-2H-pyran (23.4 mg, 0.15 mmol, 1.0 equiv) was stirred for 24 h. Purification by flash column chromatography (SiO<sub>2</sub>, 8:2 hexanes/EtOAc) furnished the title compound as clear, pale yellow oil (36 mg, 72% yield) as an inseparable mixture of 4 diastereomers.

*R<sub>f</sub>*: 0.30 (4:1 hexanes/EtOAc)

<sup>1</sup>H NMR (500 MHz, CDCl<sub>3</sub>)  $\delta$  7.66 – 7.60 (m, 3H), 7.55 – 7.48 (m, 6H), 7.44 (t, *J* = 7.7 Hz, 3H), 4.85 (d, *J* = 3.8 Hz, 1H), 4.83 (d, *J* = 4.0 Hz, 1H), 4.65 – 4.58 (m, 3H), 4.52 (dd, *J* = 7.3, 3.4 Hz, 1H), 3.95 (dddd, *J* = 10.0, 7.1, 4.7, 2.7 Hz, 2H), 3.86 (dddd, *J* = 17.4, 13.0, 7.0, 3.1 Hz, 4H), 3.60 – 3.46 (m, 5H), 3.43 (ddd, *J* = 9.9, 7.5, 4.6 Hz, 1H), 2.04 (dddd, *J* = 16.2, 13.1, 8.3, 4.5 Hz, 3H), 1.87 – 1.49 (m, 27H), 0.88 – 0.78 (m, 9H).

<sup>13</sup>C NMR (151 MHz, CDCl<sub>3</sub>)  $\delta$  144.97, 144.69, 144.67, 130.28, 129.78, 129.74, 128.69, 128.57, 128.53, 124.22, 124.20, 123.90, 123.88, 123.83, 123.80, 123.21, 123.20, 123.17, 99.63, 99.38, 99.08, 78.51, 78.35, 76.39, 75.90, 66.04, 65.64, 65.40, 65.33, 62.87, 62.63, 62.58, 62.56, 39.07, 39.01, 38.61, 38.40, 33.59, 32.78, 32.38, 30.81, 30.72, 30.71, 30.65, 25.48, 25.45, 19.89, 19.69, 19.62, 17.11, 16.87, 13.52, 13.32; Note: no C-F peaks coupling is reported as it is not clear to identify them in its entirety due to the mixture of 4 diastereomers.



$^{19}\text{F}$  NMR (376 MHz,  $\text{CDCl}_3$ )  $\delta$  -62.73, -62.74, -62.76, -62.77.

HRMS:  $m/z$  (ESI): Calcd. for  $\text{C}_{17}\text{H}_{23}\text{F}_3\text{O}_3$  [ $\text{M}+\text{Na}$ ]: 355.1497; found: 355.1500.

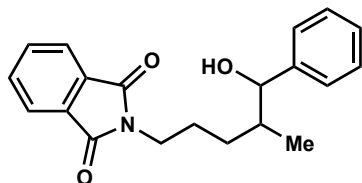

**2-(5-hydroxy-4-methyl-5-phenylpentyl)isoindoline-1,3-dione (48)**

The General Procedure II was followed in a 0.15 mmol scale using 2-(pent-4-en-1-yl)isoindoline-1,3-dione as the olefin (32 mg, 0.15 mmol) and benzaldehyde as the aldehyde (30  $\mu\text{L}$ , 0.3 mmol) (. Purification by FCC (Hexanes:EtOAc 9:1 then 4:1) delivered 39 mg of the desired compound (80%) as a clear oil and a 1:1.2 mixture of diastereomers.

$R_f$ : 0.16 (4:1 hexanes/EtOAc)

$^1\text{H}$  NMR (600 MHz,  $\text{CDCl}_3$ )  $\delta$  7.83 (td,  $J = 5.2, 3.0$  Hz, 4H), 7.71 (dd,  $J = 5.5, 3.0$  Hz, 4H), 7.33 – 7.27 (m, 8H), 7.25 – 7.19 (m, 2H), 4.55 (d,  $J = 4.2$  Hz, 1H), 4.40 (d,  $J = 6.6$  Hz, 1H), 3.68 (t,  $J = 7.3$  Hz, 2H), 3.62 (ddd,  $J = 7.7, 6.7, 1.9$  Hz, 2H), 1.91 – 1.69 (m, 6H), 1.69 – 1.59 (m, 2H), 1.46 – 1.38 (m, 1H), 1.29 – 1.19 (m, 2H), 1.15 (dddd,  $J = 13.7, 10.5, 8.8, 5.0$  Hz, 1H), 0.92 (d,  $J = 6.7$  Hz, 3H), 0.75 (d,  $J = 6.8$  Hz, 3H).

$^{13}\text{C}$  NMR (151 MHz,  $\text{CDCl}_3$ )  $\delta$  168.64, 168.57, 143.60, 143.56, 134.00, 132.32, 132.28, 128.40, 128.33, 127.66, 127.43, 126.78, 126.44, 123.32, 79.05, 78.06, 39.91, 39.83, 38.31, 38.15, 30.23, 29.45, 26.29, 26.19, 15.86, 14.40.

HRMS:  $m/z$  (ESI): Calcd. for  $\text{C}_{20}\text{H}_{21}\text{NO}_3$  [ $\text{M}+\text{H}$ ]: 324.1600; found: 324.1595.

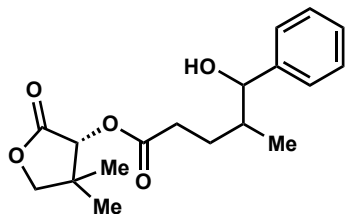

**(R)-4,4-dimethyl-2-oxotetrahydrofuran-3-yl 5-hydroxy-4-methyl-5-phenylpentanoate (49)**

The General Procedure II was followed in a 0.15 mmol scale using (R)-4,4-dimethyl-2-oxotetrahydrofuran-3-yl pent-4-enoate as the olefin (32 mg, 0.15 mmol) and benzaldehyde as the aldehyde (30  $\mu\text{L}$ , 0.3 mmol). Purification by FCC (9:1 then 4:1 hexanes/EtOAc) delivered 33 mg of the desired compound (69%) as a viscous oil and a 1:1.6:2.2:2.4 mixture of diastereomers based on integration of the  $\alpha$ -hydrogen in the lactone.

$R_f$ : 0.19 (4:1 Hexanes/EtOAc)

$^1\text{H}$  NMR (600 MHz,  $\text{CDCl}_3$ )  $\delta$  7.39 – 7.32 (m, 35H), 7.31 (dt,  $J = 6.0, 1.6$  Hz, 3H), 7.27 (t,  $J = 1.6$  Hz, 1H), 5.41 (s, 1H), 5.40 (s, 1H), 5.38 (s, 2H), 5.37 (s, 3H), 4.63 (t,  $J = 5.5$  Hz, 6H), 4.44 (t,  $J = 7.8$  Hz, 3H), 4.14 – 3.94 (m, 26H), 2.73 – 2.38 (m, 19H), 2.22 – 2.07 (m, 3H), 1.96 – 1.79 (m, 10H), 1.65 (d,  $J = 4.9$  Hz, 4H), 1.61 – 1.57 (m, 2H), 1.53 (dtdd,  $J = 10.9, 8.7, 6.1, 3.6$  Hz, 6H), 1.22 (dd,  $J = 9.5, 2.4$  Hz, 28H), 1.15 – 1.06 (m, 32H), 0.95 (dd,  $J = 6.8, 4.7$  Hz, 18H), 0.80 (dd,  $J = 6.9, 5.2$  Hz, 9H).

The integration of the diastereomers was normalized to the closest integer.

$^{13}\text{C}$  NMR (151 MHz,  $\text{CDCl}_3$ )  $\delta$  176.77, 172.37, 172.27, 172.18, 172.15, 172.08, 172.07, 171.99, 142.87, 142.70, 142.64, 127.90, 127.89, 127.83, 127.79, 127.21, 127.17, 126.98, 126.93, 126.17, 126.17, 125.86, 125.83, 78.42, 78.40, 77.02, 76.91, 75.85, 75.80, 75.78, 75.77, 75.75, 75.30, 74.44, 74.42, 39.73, 39.70, 39.17, 39.14, 39.14, 39.08, 31.33, 31.28, 31.26, 31.17, 29.25, 27.67, 27.55, 27.21, 22.60, 22.58, 22.47, 19.47, 18.32, 15.42, 15.36, 13.62, 13.60.

The diastereomers overlap at 142.87 and 19.47.

**HRMS:** Calcd. for  $\text{C}_{18}\text{H}_{24}\text{O}_5$  [ $\text{M} - \text{OH}$ ]: 303.1596; found: 303.1599.

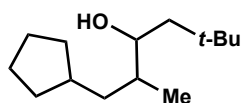

### 1-cyclopentyl-2,5,5-trimethylhexan-3-ol (50)

The General Procedure IV was followed in a 0.3 mmol scale and at 0 °C using allylcyclopentane as the olefin (42  $\mu\text{L}$ , 0.3 mmol) and 3,3-dimethyl-butyraldehyde as the aldehyde (75  $\mu\text{L}$ , 0.6 mmol). Purification by FCC (hexanes then 9:1 hexanes/ $\text{Et}_2\text{O}$ ) delivered 25 mg of the desired compound (39%) as a pale yellow oil and as a 1:1.5 mixture of diastereomers. Also, the reaction was ran at 0 °C.

**R<sub>f</sub>:** 0.39 (9:1 hexanes/ $\text{EtOAc}$ )

$^1\text{H}$  NMR (600 MHz,  $\text{CDCl}_3$ )  $\delta$  3.66 (dt,  $J = 6.2, 2.8$  Hz, 1H), 3.64 – 3.60 (m, 2H), 1.92 – 1.80 (m, 3H), 1.79 – 1.69 (m, 4H), 1.61 (ttd,  $J = 9.6, 6.6, 4.0$  Hz, 6H), 1.56 – 1.44 (m, 4H), 1.41 – 1.14 (m, 13H), 1.14 – 0.99 (m, 8H), 0.95 (s, 22H), 0.89 (d,  $J = 6.8$  Hz, 4H), 0.85 (d,  $J = 6.8$  Hz, 3H).

70 H because of 1:1.5 mixture of diastereomers.

$^{13}\text{C}$  NMR (151 MHz,  $\text{CDCl}_3$ )  $\delta$  73.56, 72.67, 48.68, 47.23, 39.63, 39.47, 39.35, 38.49, 37.80, 37.76, 33.78, 33.56, 32.61, 32.39, 30.35, 30.28, 30.22, 25.31, 25.27, 25.24, 15.07, 13.98.

The diastereomers overlap at 25.27 and 30.27.

**HRMS:**  $m/z$  (APCI): Calcd. for  $\text{C}_{14}\text{H}_{28}\text{O}$  [ $\text{M} - \text{H}_2 + \text{H}$ ] 211.2062; found: 211.2062.

Dehydrogenation seem to occur under the APCI conditions.

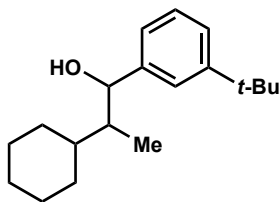

### 1-(3-(tert-butyl)phenyl)-2-cyclohexylpropan-1-ol (52)

The General Procedure IV was followed on a 0.15 mmol scale using vinylcyclohexane (18  $\mu\text{L}$ , 0.15 mmol) as the olefin and 3-(tert-butyl)benzaldehyde as the aldehyde (30  $\mu\text{L}$ , 0.2 mmol). Purification by FCC ( $\text{SiO}_2$ , 9:1 hexanes/ $\text{EtOAc}$ ) delivered 22 mg (53%) as a pale yellow oil and a 1:1.5 mixture of diastereomers.

**R<sub>f</sub>:** 0.65 (4:1 hexanes/ $\text{EtOAc}$ )

$^1\text{H}$  NMR (600 MHz,  $\text{CD}_2\text{Cl}_2$ )  $\delta$  7.32 (q,  $J = 2.0$  Hz, 3H), 7.31 – 7.22 (m, 5H), 7.12 (dq,  $J = 7.5, 1.6$  Hz, 3H), 4.72 (d,  $J = 5.8$  Hz, 1H), 4.44 (d,  $J = 9.0$  Hz, 1.5H), 1.89 – 1.51 (m, 20H), 1.31 (s, 18H), 1.30 – 0.97 (m, 16H), 0.87 (d,  $J = 6.9$  Hz, 3H), 0.53 (d,  $J = 7.1$  Hz, 4H). (75 H total because of 1:1.5 mixture of diastereomers).

<sup>13</sup>C NMR (151 MHz, CD<sub>2</sub>Cl<sub>2</sub>) δ 151.70, 151.54, 145.07, 144.72, 128.41, 128.36, 124.86, 124.58, 124.49, 124.37, 123.88, 123.69, 77.40, 76.51, 46.34, 45.73, 40.27, 38.38, 35.11, 32.73, 32.28, 31.69, 29.51, 27.73, 27.50, 27.40, 27.36, 27.26, 27.23, 27.18, 11.67, 10.73.

The diastereomers overlap at 31.69 and at a second peak.

**Diastereomer 1 (minor):**

**GC:** (GC/MSD; HP-5MS UI; 139 Kpa; flow rate 2 mL/min; inlet temperature 250 °C; column temperature 50 °C for 0 min, then 20 °C/min to 100 °C, then 30°C/min to 280 °C):  $t_R = 7.714$  min;

**MS:** (EI, 70 eV):  $m/z$  (%): 256.2 (23), 241.1 (10), 199.2 (10), 190.1 (24), 163.1 (100), 147.1 (13), 129.0 (11), 109.1 (29), 91.0 (25), 67.0 (11), 57.1 (56).

**Diastereomer 2 (major):**

**GC:** (GC/MSD; HP-5MS UI; 139 Kpa; flow rate 2 mL/min; inlet temperature 250 °C; column temperature 50 °C for 0 min, then 20 °C/min to 100 °C, then 30°C/min to 280 °C):  $t_R = 7.760$  min;

**MS:** (EI, 70 eV):  $m/z$  (%): 274.2 (0.3), 256.2 (19), 241.2 (8), 199.1 (8), 163.1 (100), 91.1 (16), 57.1 (43).

**HRMS:**  $m/z$  (APCI): Calcd. for C<sub>19</sub>H<sub>30</sub>O [M + H]: 275.2375; found: 275.2777.

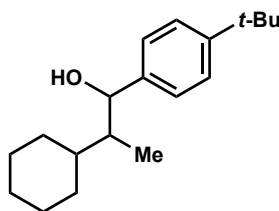

**1-(4-(tert-butyl)phenyl)-2-cyclohexylpropan-1-ol (53)**

The General Procedure II was followed on a 0.1 mmol scale using vinylcyclohexane (12 μL, 0.1 mmol) as the olefin and 4-(tert-butyl)benzaldehyde as the aldehyde (30 μL, 0.2 mmol), and the following modifications:

- 0.2 equiv. of Co(salen) and 0.2 equiv. of the oxidant were used. Purification by PTLC (4:1 hexanes:EtOAc) delivered 17 mg of the desired compound (63%) as a clear oil and a 1:1.3 mixture of diastereomers.

$R_f$ : 0.58 (4:1 hexanes/EtOAc)

<sup>1</sup>H NMR (600 MHz, CDCl<sub>3</sub>) δ 7.38 – 7.33 (m, 5H), 7.24 (dt,  $J = 8.1, 3.5$  Hz, 5H), 4.75 (d,  $J = 5.7$  Hz, 1H), 4.43 (d,  $J = 9.4$  Hz, 1H), 1.88 (tt,  $J = 11.9, 3.2$  Hz, 1H), 1.82 – 1.65 (m, 13H), 1.65 – 1.52 (m, 5H), 1.42 – 1.35 (m, 1H), 1.32 (s, 9H), 1.32 (s, 13H), 1.28 – 1.09 (m, 5H), 1.07 – 0.95 (m, 2H), 0.89 (d,  $J = 6.9$  Hz, 3H), 0.54 (d,  $J = 7.1$  Hz, 4H). (68H due to 1:1.3 mixture of diastereomers. It should be 69 H but the H adjacent to the alcohol in the product of the major diastereomer was normalized to 1H (integration is 1.3H)).

<sup>13</sup>C NMR (151 MHz, CDCl<sub>3</sub>) δ 150.67, 150.08, 141.76, 141.49, 126.74, 125.91, 125.38, 125.26, 76.61, 75.65, 45.62, 45.22, 39.81, 37.81, 34.67, 34.62, 32.28, 31.85, 31.54, 31.52, 29.22, 27.22, 27.08, 26.87, 26.85, 26.82, 26.68, 26.66, 11.55, 10.41.

**Diastereomer 1:**

**GC:** (GC/MSD; HP-5MS UI; 139 Kpa; flow rate 2 mL/min; inlet temperature 250 °C; column temperature 50 °C for 0 min, then 20 °C/min to 100 °C, then 30°C/min to 280 °C):  $t_R = 7.891$  min;

**MS:** (EI, 70 eV):  $m/z$  (%): 274 (0.3), 256.2 (2), 241.2 (2), 163.1 (100), 133.1 (5), 105.1 (3), 91.1 (6), 57.1 (13).

### Diastereomer 2:

GC: (GC/MSD; HP-5MS UI; 139 Kpa; flow rate 2 mL/min; inlet temperature 250 °C; column temperature 50 °C for 0 min, then 20 °C/min to 100 °C, then 30°C/min to 280 °C):  $t_R = 7.937$  min;

MS: (EI, 70 eV):  $m/z$  (%): 274.2 (0.4), 256.2 (2), 241.2 (3), 190.2 (3), 163.2 (100), 57.1 (14).

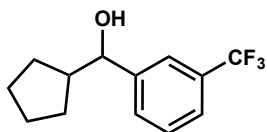

### cyclopentyl(3-(trifluoromethyl)phenyl)methanol (54)

The General Procedure **III** was followed on a 0.15 mmol scale using cyclopentene (13  $\mu$ L, 0.15 mmol) as the olefin and 3-(trifluoromethyl)benzaldehyde as the aldehyde (36  $\mu$ L, 0.27 mmol). And the following modifications:

- 1 equiv. of  $\text{NaBF}_4$  (16 mg, 0.15 mmol) was used as an additive

Purification by FCC (hexanes then 9:1 hexanes/ $\text{Et}_2\text{O}$ ) delivered 27 mg of the desired compound (73%) as a pale yellow oil.

**Note:**  $\text{NaBF}_4$  seemed to have a beneficial effect in the dissolution of the  $\text{CrCl}_3$  anhydrous and in increasing the yield of product, but its benefit seems to be substrate-dependent. For instance, although it seemed to help in increasing the yield of the reaction with cyclopentene (54% without it), it did not help in the case of cyclohexene below.

$R_f$ : 0.27 (9:1 hexanes/ $\text{EtOAc}$ )

$^1\text{H NMR}$  (600 MHz,  $\text{CDCl}_3$ )  $\delta$  7.61 (d,  $J = 1.9$  Hz, 1H), 7.53 (dd,  $J = 7.5, 1.8$  Hz, 2H), 7.45 (t,  $J = 7.7$  Hz, 1H), 4.51 (d,  $J = 8.1$  Hz, 1H), 2.27 – 2.16 (m, 1H), 1.86 (m,  $J = 11.9, 7.3, 4.7$  Hz, 1H), 1.67 (m,  $J = 12.9, 9.1, 4.8, 3.1$  Hz, 1H), 1.63 – 1.45 (m, 4H), 1.40 (m,  $J = 12.4, 11.5, 6.5, 3.1$  Hz, 1H), 1.18 (m,  $J = 12.7, 8.5$  Hz, 1H).

$^{13}\text{C NMR}$  (151 MHz,  $\text{CDCl}_3$ )  $\delta$  145.50, 130.81 (q,  $J = 32.5$  Hz), 129.97 (d,  $J = 1.2$  Hz), 128.88, 124.44 (q,  $J = 3.8$  Hz), 124.12 (q,  $J = 273.3$  Hz), 123.38 (q,  $J = 3.8$  Hz), 78.50, 47.91, 29.50, 29.29, 25.61, 25.55.

$^{19}\text{F NMR}$  (376 MHz,  $\text{CDCl}_3$ )  $\delta$  -62.79.

HRMS:  $m/z$  (APCI): Calcd. for  $\text{C}_{13}\text{H}_{15}\text{F}_3\text{O}$  [ $\text{M} - \text{OH}$ ] 227.1048; found: 227.1047.

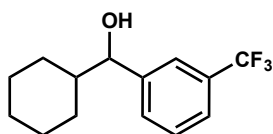

### cyclohexyl(3-(trifluoromethyl)phenyl)methanol (55)

The General Procedure **III** was followed in a 0.15 mmol scale using cyclohexene as the olefin (15  $\mu$ L, 0.15 mmol) and 3-(trifluoromethyl)benzaldehyde as the aldehyde (36  $\mu$ L, 0.27 mmol). Purification by FCC (hexanes then 9:1 hexanes/ $\text{Et}_2\text{O}$ ) delivered 20 mg of the desired compound (51%) as a pale yellow oil.

$R_f$ : 0.52 (4:1 hexanes/ $\text{EtOAc}$ )

$^1\text{H NMR}$  (600 MHz,  $\text{CDCl}_3$ )  $\delta$  7.57 (d,  $J = 2.1$  Hz, 1H), 7.55 – 7.51 (m, 1H), 7.50 – 7.47 (m, 1H), 7.45 (t,  $J = 7.6$  Hz, 1H), 4.46 (dd,  $J = 6.9, 2.6$  Hz, 1H), 1.96 – 1.86 (m, 2H), 1.81 – 1.73 (m, 1H), 1.72 – 1.67 (m, 1H), 1.67 – 1.57 (m, 1H), 1.44 – 1.37 (m, 1H), 1.28 – 1.10 (m, 3H), 1.08 – 1.00 (m, 1H), 1.01 – 0.92 (m, 1H).

$^{13}\text{C}$  NMR (151 MHz,  $\text{CDCl}_3$ )  $\delta$  144.66, 130.66 (q,  $J = 32.5$  Hz), 130.11 (q,  $J = 1.6, 1.1$  Hz), 128.71, 124.34 (q,  $J = 273.5$  Hz), 124.33 (q,  $J = 3.7$  Hz), 123.51 (q,  $J = 3.7$  Hz), 78.85, 45.18, 29.37, 28.51, 26.46, 26.17, 26.07.  
 $^{19}\text{F}$  NMR (376 MHz,  $\text{CDCl}_3$ )  $\delta$  -62.77.

HRMS:  $m/z$  (APCI): Calcd. for  $\text{C}_{14}\text{H}_{17}\text{F}_3\text{O}$  [ $\text{M} - \text{OH}$ ] 241.1204; found: 241.1210.

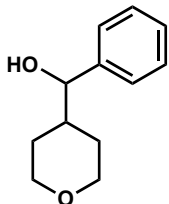

### phenyl(tetrahydro-2H-pyran-4-yl)methanol (56)

The General Procedure III was followed in a 0.15 mmol scale using 3,6-dihydro-2H-pyran as the olefin (13 mg, 0.15 mmol) and benzaldehyde as the aldehyde (30  $\mu\text{l}$ , 0.3 mmol). Purification by flash column chromatography ( $\text{SiO}_2$ , 9:1 hexanes/EtOAc then 4:1 hexanes/EtOAc) delivered 15 mg of the desired compound (52%) as a clear oil and a single regioisomer and diastereomer.

$R_f$ : 0.25 (7:3 hexanes/EtOAc)

$^1\text{H}$  NMR (600 MHz,  $\text{CDCl}_3$ )  $\delta$  7.38 – 7.33 (m, 2H), 7.33 – 7.27 (m, 3H), 4.37 (d,  $J = 7.7$  Hz, 1H), 4.02 (ddd,  $J = 11.5, 5.1, 1.7$  Hz, 1H), 3.90 (ddd,  $J = 11.3, 5.5, 1.8$  Hz, 1H), 3.37 (ddd,  $J = 12.3, 11.5, 2.3$  Hz, 1H), 3.32 – 3.25 (m, 1H), 1.91 (ddq,  $J = 13.2, 4.2, 2.2$  Hz, 1H), 1.85 (dtt,  $J = 11.7, 7.9, 3.8$  Hz, 1H), 1.51 – 1.41 (m, 1H), 1.38 – 1.28 (m, 1H), 1.16 (ddq,  $J = 13.3, 4.2, 2.2$  Hz, 1H).

$^{13}\text{C}$  NMR (151 MHz,  $\text{CDCl}_3$ )  $\delta$  142.98, 128.57, 127.98, 126.76, 79.06, 68.03, 67.84, 42.58, 29.48, 29.36.

GC: (GC/MSD; HP-5MS UI; 139 Kpa; flow rate 2 mL/min; inlet temperature 250  $^\circ\text{C}$ ; column temperature 50  $^\circ\text{C}$  for 0 min, then 20  $^\circ\text{C}/\text{min}$  to 100  $^\circ\text{C}$ , then 30 $^\circ\text{C}/\text{min}$  to 280  $^\circ\text{C}$ ):  $t_R = 6.518$  min;

MS: (EI, 70 eV):  $m/z$  (%): 191.9 (3), 174.1 (8), 129.1 (19), 114.9 (10), 107.1 (100), 105.0 (22), 91.0 (12), 85.0 (22), 79.0 (42), 68.0 (11), 50.9 (10).

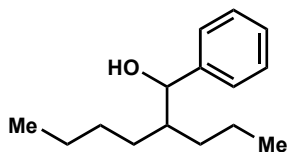

### 1-phenyl-2-propylhexan-1-ol (57)

The General Procedure III was followed in a 0.15 mmol scale using trans-4-octene as the olefin (24  $\mu\text{L}$ , 0.15 mmol) and benzaldehyde as the aldehyde (30  $\mu\text{L}$ , 0.3 mmol). Purification by flash column chromatography ( $\text{SiO}_2$ , hexanes then 9:1 hexanes/ $\text{Et}_2\text{O}$ ) delivered 11 mg of the desired compound (33%) as a clear oil and a 1:1.1 mixture of diastereomers.

$R_f$ : 0.71 (4:1 hexanes/EtOAc)

$^1\text{H}$  NMR (600 MHz,  $\text{CDCl}_3$ )  $\delta$  7.37 – 7.29 (m, 8H), 7.27 (d,  $J = 2.1$  Hz, 1H), 7.25 (t,  $J = 2.1$  Hz, 1H), 4.67 (d,  $J = 2.5$  Hz, 1H), 4.66 (d,  $J = 2.6$  Hz, 1H), 1.74 – 1.50 (m, 4H), 1.47 – 1.05 (m, 16H), 0.85 (qt,  $J = 7.1, 5.3$  Hz, 12H).

<sup>13</sup>C NMR (151 MHz, CDCl<sub>3</sub>) δ 144.16, 128.31, 127.33, 127.32, 126.55, 126.54, 76.43, 76.40, 44.88, 44.84, 32.38, 31.09, 29.79, 29.36, 29.22, 28.42, 23.26, 23.15, 20.27, 20.21, 14.64, 14.55, 14.22, 14.20.

The diastereomers overlap at 144.16 and 128.31.

GC: (GC/MSD; HP-5MS UI; 139 Kpa; flow rate 2 mL/min; inlet temperature 250 °C; column temperature 50 °C for 0 min, then 20 °C/min to 100 °C, then 30°C/min to 280 °C):  $t_R$  = 6.403 min (both diastereomers overlap);

MS: (EI, 70 eV):  $m/z$  (%): 219.0 (3), 202.1 (10), 129.0 (8), 117.0 (27), 107.0 (100), 91.0 (19), 79.1 (20), 55.0 (6).

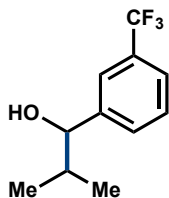

### 2-methyl-1-(3-(trifluoromethyl)phenyl)propan-1-ol (58)

The title compound was prepared by treating 3-(trifluoromethyl)benzaldehyde (510 μL, 5 mmol) with isopropylmagnesium chloride (2.5 mL of a 2 M solution, 5 mmol) at room temperature in Et<sub>2</sub>O (10 mL). After stirring overnight, the reaction was quenched by addition of NH<sub>4</sub>Cl, extracted with Et<sub>2</sub>O, dried with MgSO<sub>4</sub>, and concentrated under vacuo. The desired compound was purified by flash column chromatography (SiO<sub>2</sub>, pentanes/Et<sub>2</sub>O 9:1) to afford 215 mg (20%) as a yellow oil (reduction of the aldehyde to the alcohol was a major by-product).

$R_f$ : 0.57 in 9:1 hexanes/EtOAc

<sup>1</sup>H NMR (500 MHz, CDCl<sub>3</sub>) δ 7.61 – 7.56 (m, 1H), 7.55 – 7.51 (m, 1H), 7.51 – 7.48 (m, 1H), 7.45 (t,  $J$  = 7.6 Hz, 1H), 4.46 (d,  $J$  = 6.3 Hz, 1H), 1.95 (m, 1H), 0.97 (d,  $J$  = 6.7 Hz, 3H), 0.83 (d,  $J$  = 6.8 Hz, 3H).

<sup>13</sup>C NMR (126 MHz, CDCl<sub>3</sub>) δ 144.68, 130.05, 128.72, 124.22 (q,  $J$  = 3.8 Hz), 123.44 (q,  $J$  = 3.8 Hz), 79.37, 35.46, 19.00, 17.87.

GC: (GC/MSD; HP-5MS UI; 139 Kpa; flow rate 2 mL/min; inlet temperature 250 °C; column temperature 50 °C for 0 min, then 20 °C/min to 100 °C, then 30°C/min to 280 °C):  $t_R$  = 4.366 min;

MS: (EI, 70 eV):  $m/z$  (%): 218.1 (1), 200.1 (8), 175.0 (100), 145.0 (10), 127.0 (48), 51.0 (2).

## Stoichiometric experiments

### Part 1: Formation of alkyl-cobalt and determination of its yield

Following a modified procedure,<sup>xix</sup> in a N<sub>2</sub>-filled glove box, an oven-dried 1 dram vial containing Co(II) (30 mg, 0.05 mmol), pyridine-d<sub>5</sub> (8 μL, 0.1 mmol), and ca. 20% Na/Hg (25 mg, 0.25 mmol) THF was added (0.6 mL, 0.08 M) to form a red suspension. The mixture was stirred for 30 minutes at room temperature at which point the suspension had turned into a homogeneous green solution. The stirring was stopped to allow residual Na/Hg to settle at the bottom of the vial and the solution was transferred to a 1-dram vial containing 2-bromopropane (5 μL, 0.06 mmol) in 0.6 mL of THF. The solution turned into a brown homogeneous solution right away. This reaction mixture was left stirring for 30 minutes, at which point trimethoxybenzene (150 μL of a 0.33 M solution in THF, 0.05 mmol) was added. An aliquot of approximately 50 μL of this solution was taken and diluted in 500 μL of d<sub>6</sub>-DMSO in an NMR tube. The NMR tube was capped and covered with parafilm before being taken out of the glovebox. <sup>1</sup>H NMR analysis indicated that the alkyl cobalt was present in 21% yield. The reaction was repeated and a similar yield was obtained (19%). See reference xx for a discussion of possible reaction through the ligand under similar conditions in Co(salen) complexes.

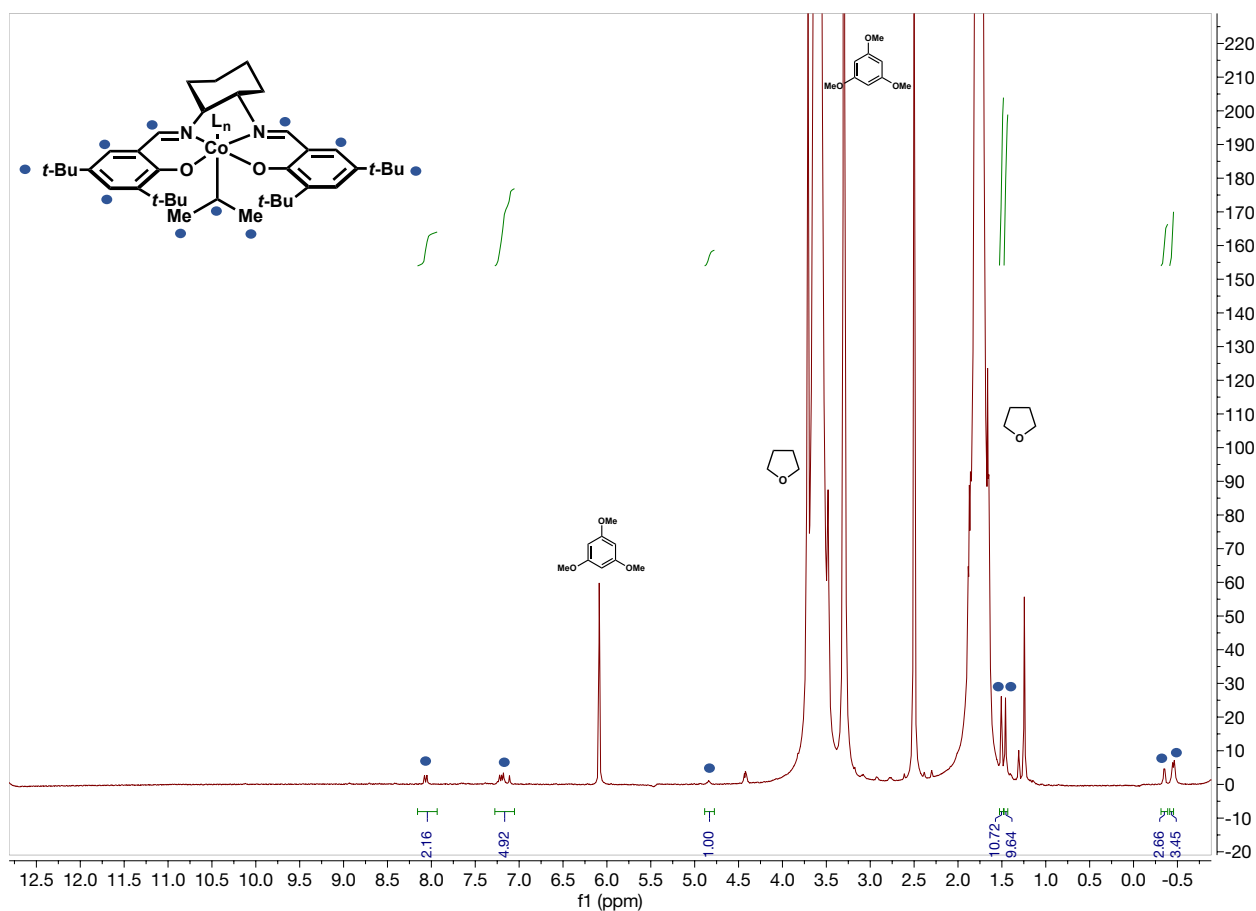

**Figure S3a:** Identification of the alkyl-cobalt by <sup>1</sup>H NMR using trimethoxybenzene as an internal standard. See reference xix for full characterization. Some peaks overlap with residual THF.

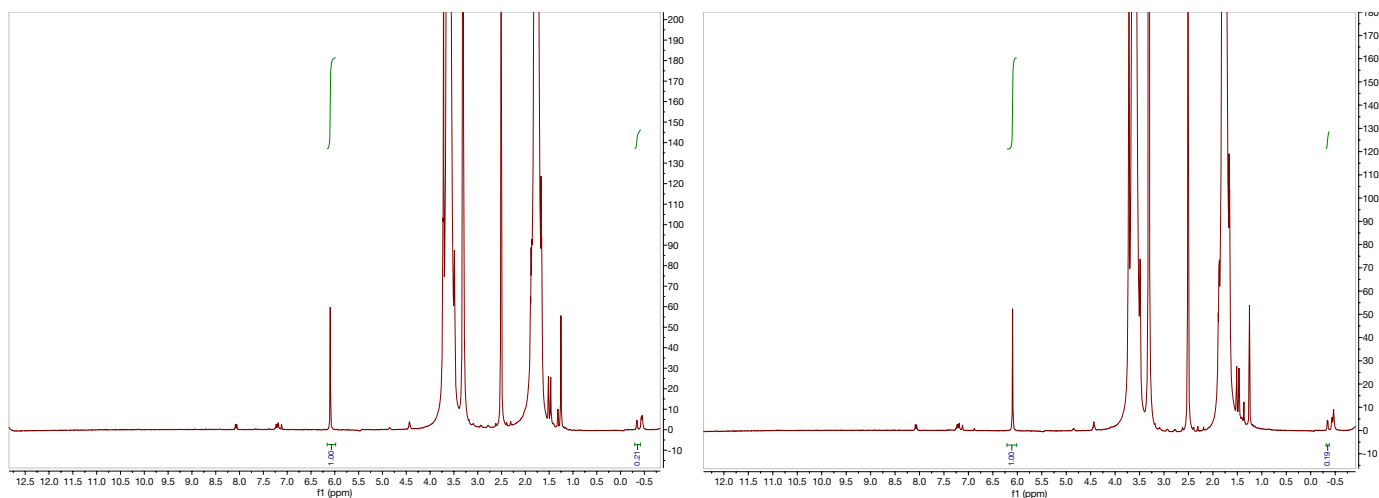

**Figure S3b:** Determination of the NMR yield of the alkyl-cobalt by  $S_N2$  of  $\text{Co}^{\text{I}}(\text{Sal}^{t\text{-Bu}}, t\text{-Bu})(\text{py})_2$  with isopropyl bromide (two independent experiments).

### Part 2: Reaction with $\text{Cr}^{+2}$

To the solution mentioned in Part 1,  $\text{CrCl}_2$  (12 mg, 0.1 mmol), and 3-trifluoromethylbenzaldehyde (12  $\mu\text{L}$ , 0.1 mmol) were added. The reaction was capped with a septum, covered with parafilm, and taken out of the glovebox. The mixture was stirred for 24 hours at room temperature at which point dodecane was added (11  $\mu\text{L}$ , 0.05 mmol) and an aliquot was analyzed by GC-FID. The yield was determined to be 11% when compared to 0.05 mmol of dodecane. Given that the alkyl-cobalt was formed in 20% average, this correspond to a yield in the range of 52-57%.

### Part 3: Reaction with $\text{Cr}^{+3}$

The procedure described in Part 1 was repeated. To the brown solution obtained at the end,  $\text{CrCl}_3(\text{THF})_3$  (37 mg, 0.1 mmol), and 3-trifluoromethylbenzaldehyde (12  $\mu\text{L}$ , 0.1 mmol) were added. The reaction was capped with a septum, covered with parafilm, and taken out of the glovebox. The mixture was stirred for 24 hours at room temperature at which point dodecane was added (11  $\mu\text{L}$ , 0.05 mmol) and an aliquot was analyzed by GC-FID. No product was observed on two repetitions of the reaction.

### Part 4: Control experiment with bromopropane

To an oven-dried vial that contained  $\text{CrCl}_2$  (15 mg, 0.12 mmol) in 600  $\mu\text{L}$  of THF, 2 equiv. of aldehyde (12  $\mu\text{L}$ , 0.1 mmol) and 1 equiv. of the isopropyl bromide (5  $\mu\text{L}$ , 0.05 mmol) were added. The reaction was left stirring for 24 hours under Argon, then 11  $\mu\text{L}$  of dodecane were added and the reaction was analyzed by GC/MS and GC/FID comparing to a sample of authentic material. No product was observed. Note: Due to the volatility of the alkyl-bromide, it was not possible to determine what happened to the starting material. Only recovered aldehyde was observed.



## Observation of the alkyl-[Co] by $^1\text{H}$ NMR from the reaction system.

Like our group's previous identification of the alkyl-Co by  $^1\text{H}$  NMR,<sup>xix</sup> we observe the characteristic doublets close to -0.4 and -0.5 ppm in our reaction mixture after addition of the silane (Figure S4a and Figure S4b), suggesting formation of an alkyl-Co organometallic after HAT. See reference **xix** for more details.

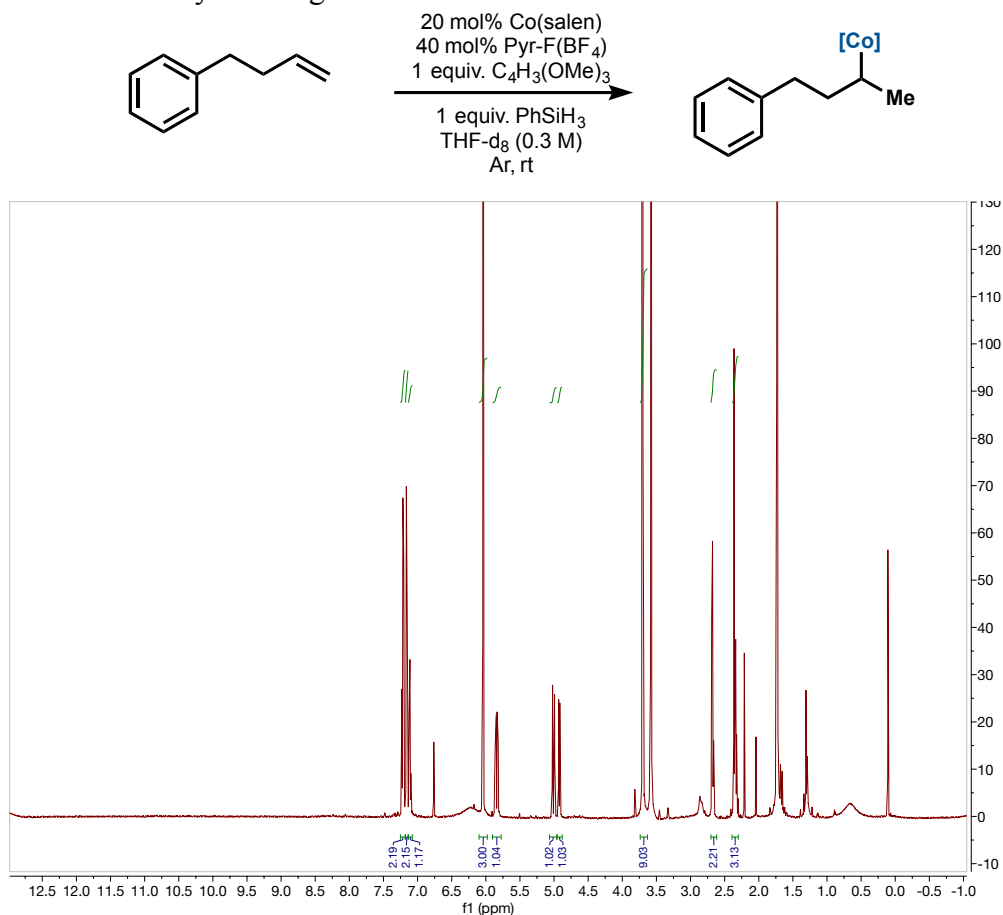

**Figure S4a:** Reaction mixture in THF-d<sub>8</sub> prior addition of the PhSiH<sub>3</sub>, aldehyde, and CrCl<sub>3</sub>.

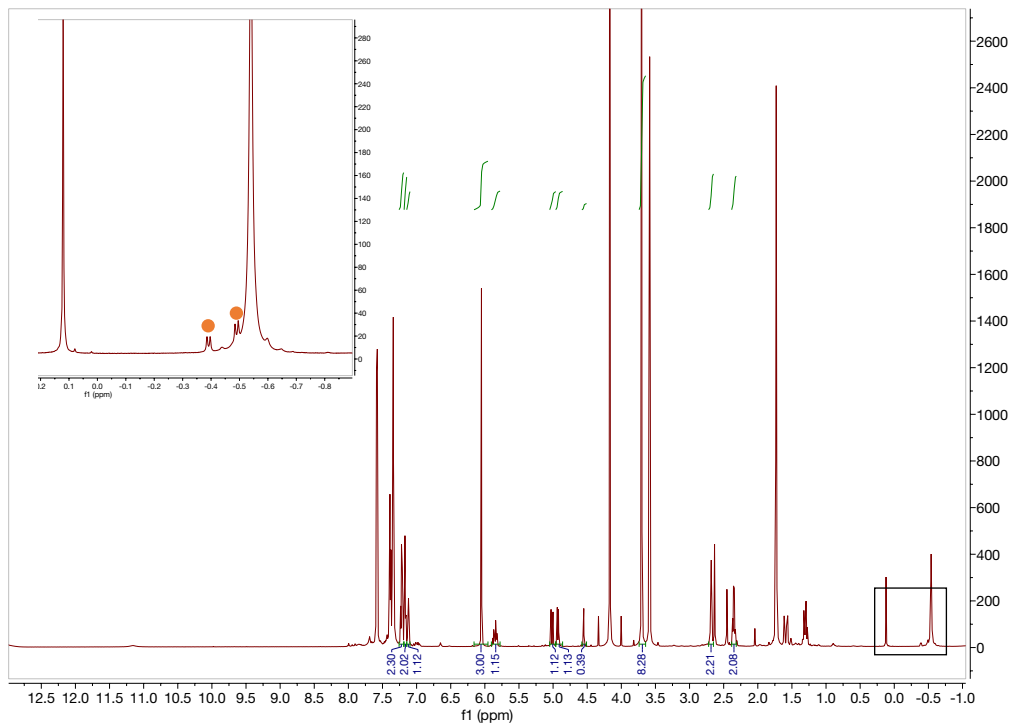

**Figure S4b:** Reaction mixture in THF-d8 after addition of the  $\text{PhSiH}_3$ , and before addition of the aldehyde, and  $\text{CrCl}_3$ .

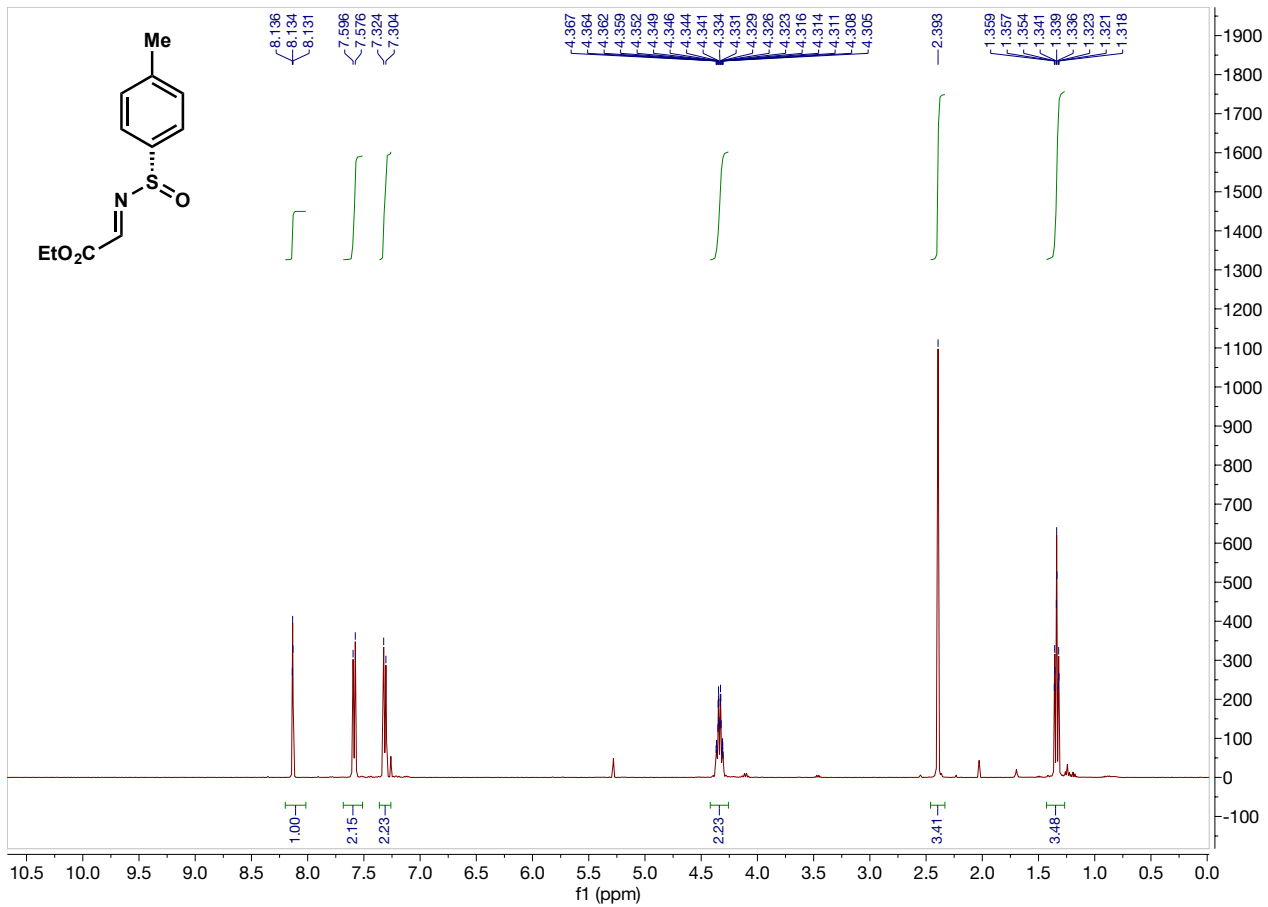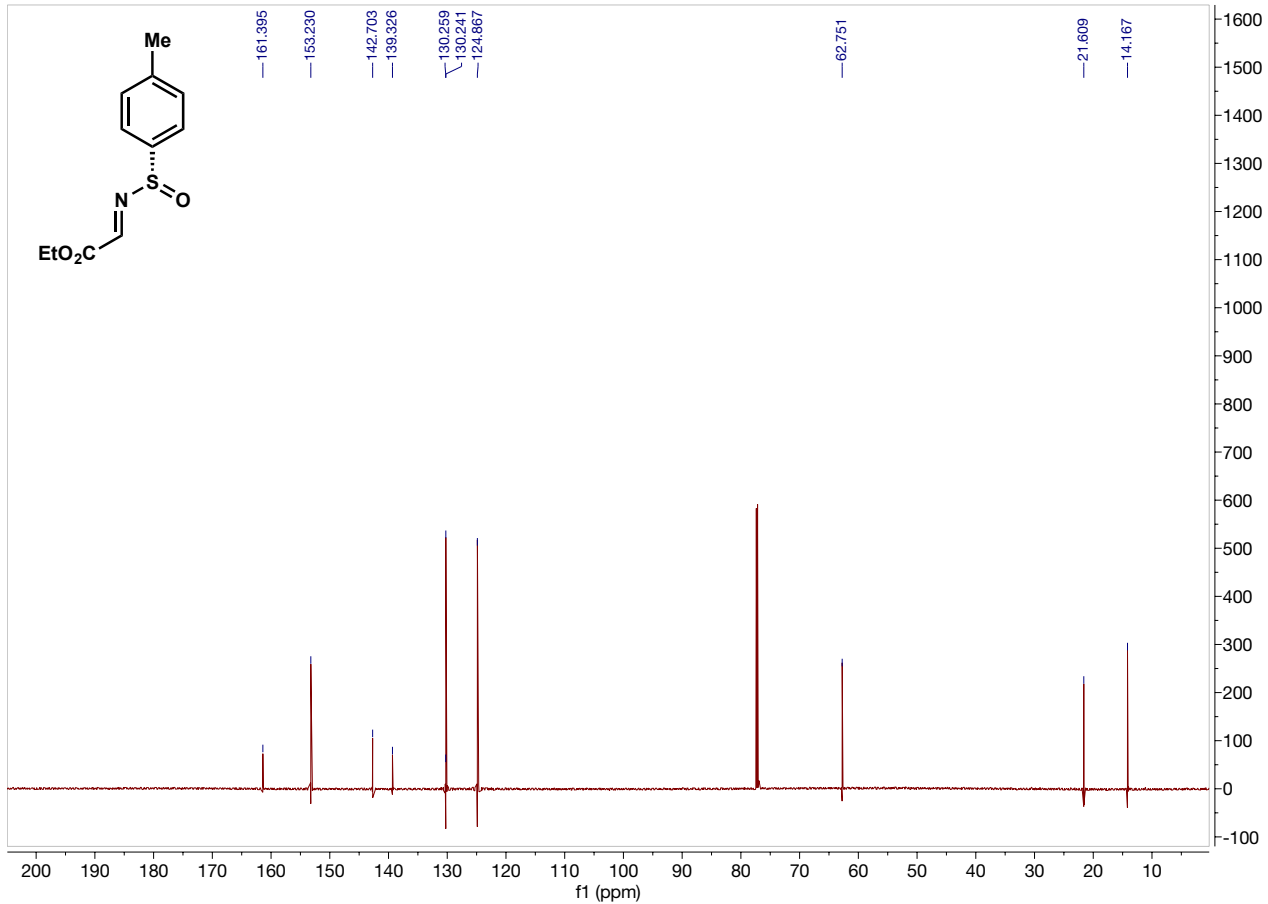

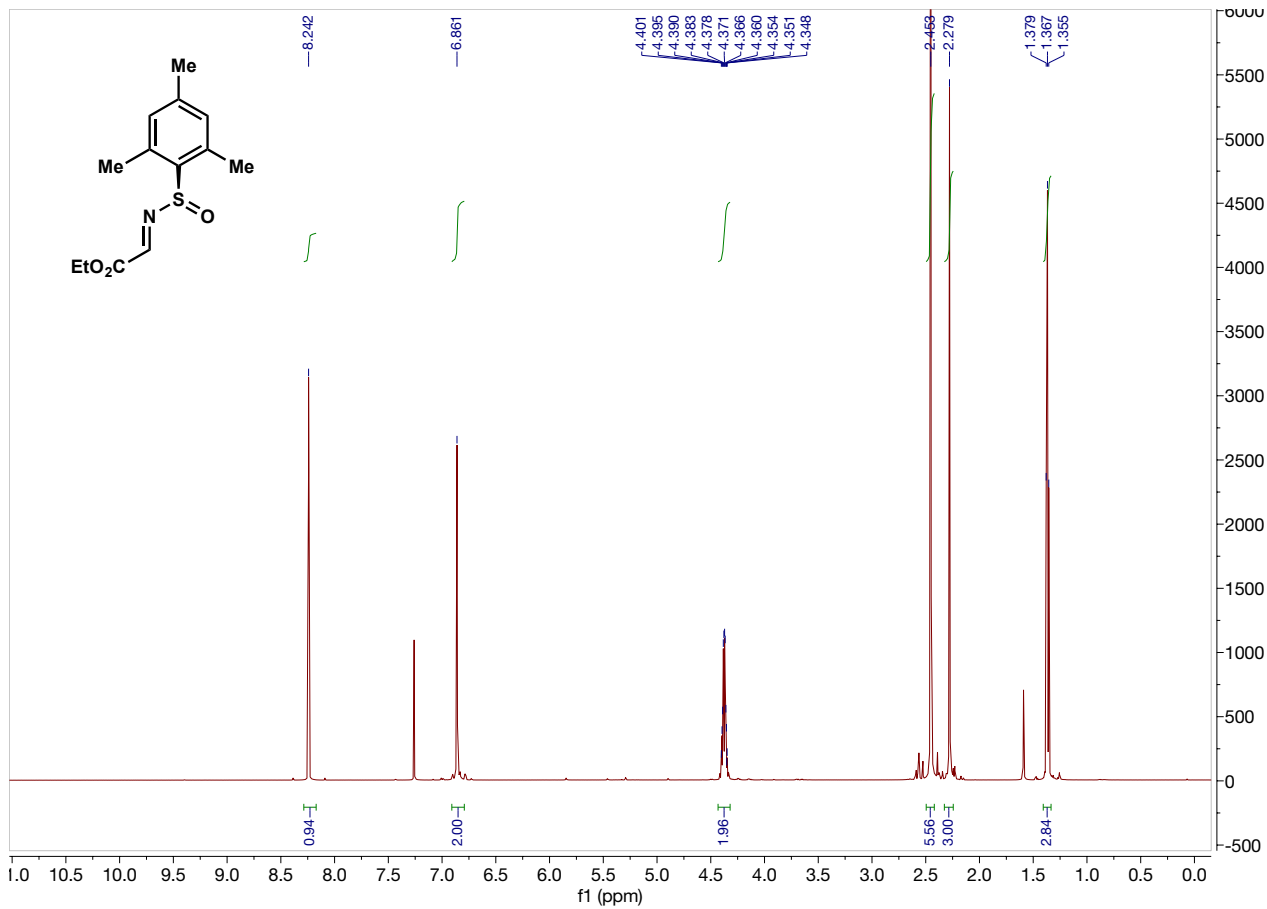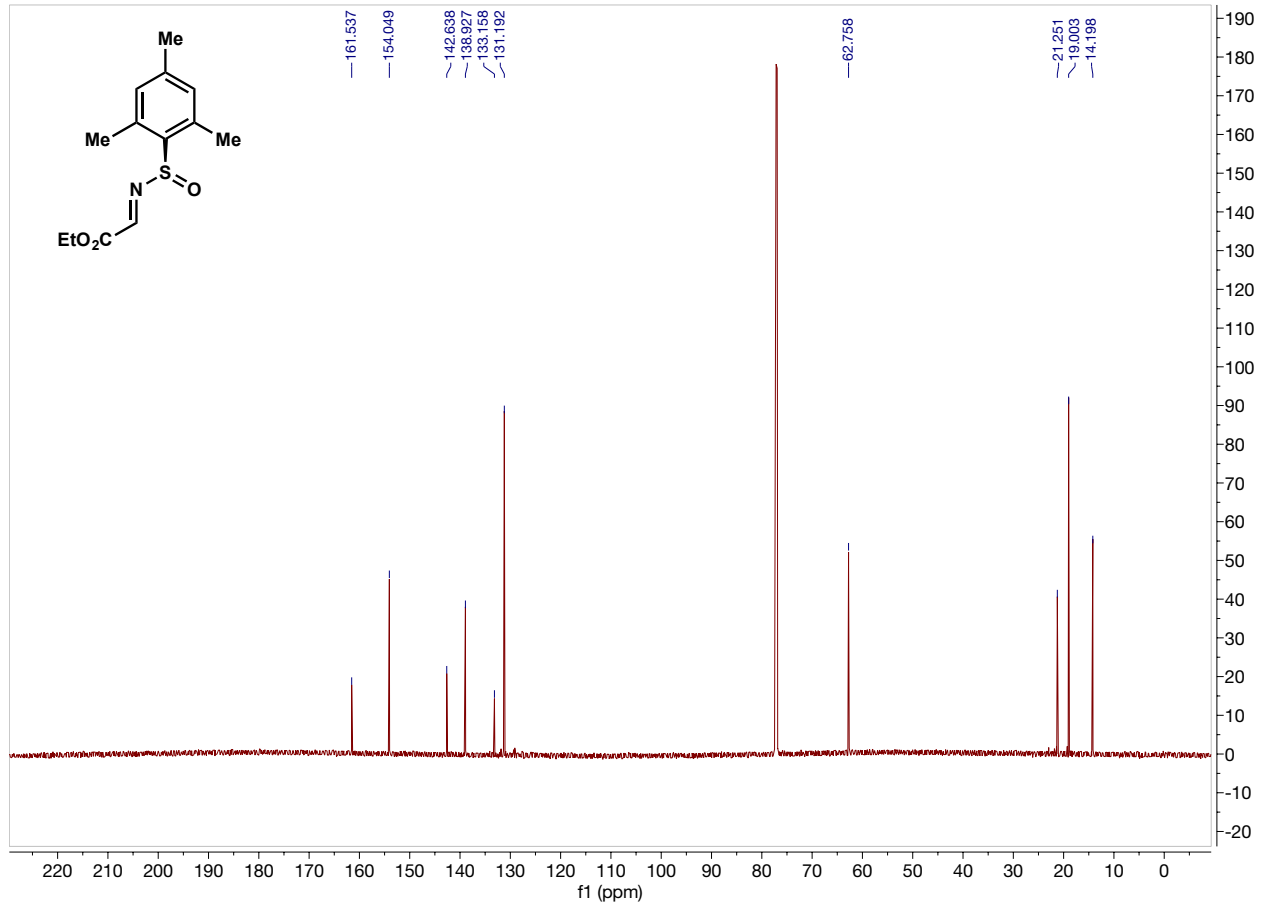

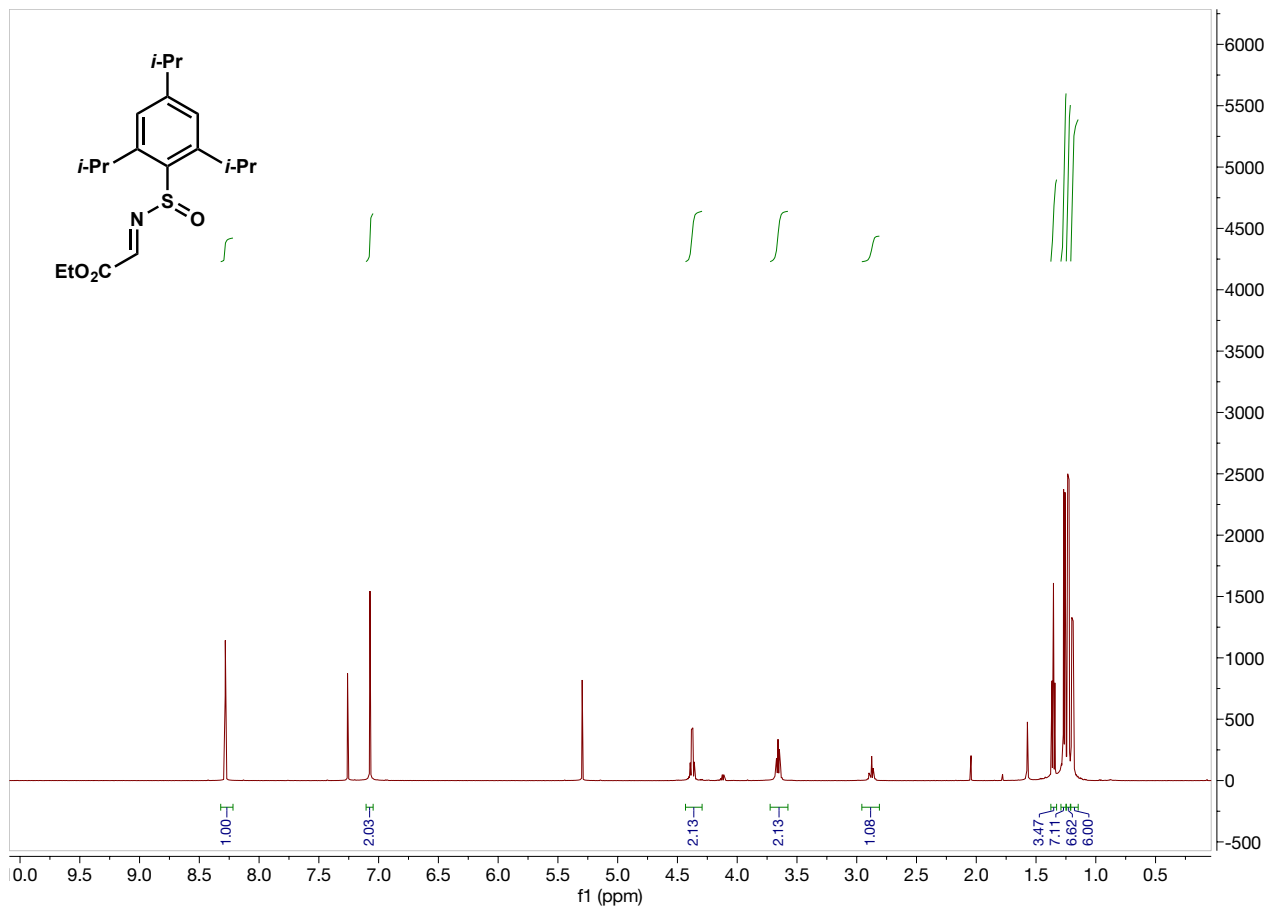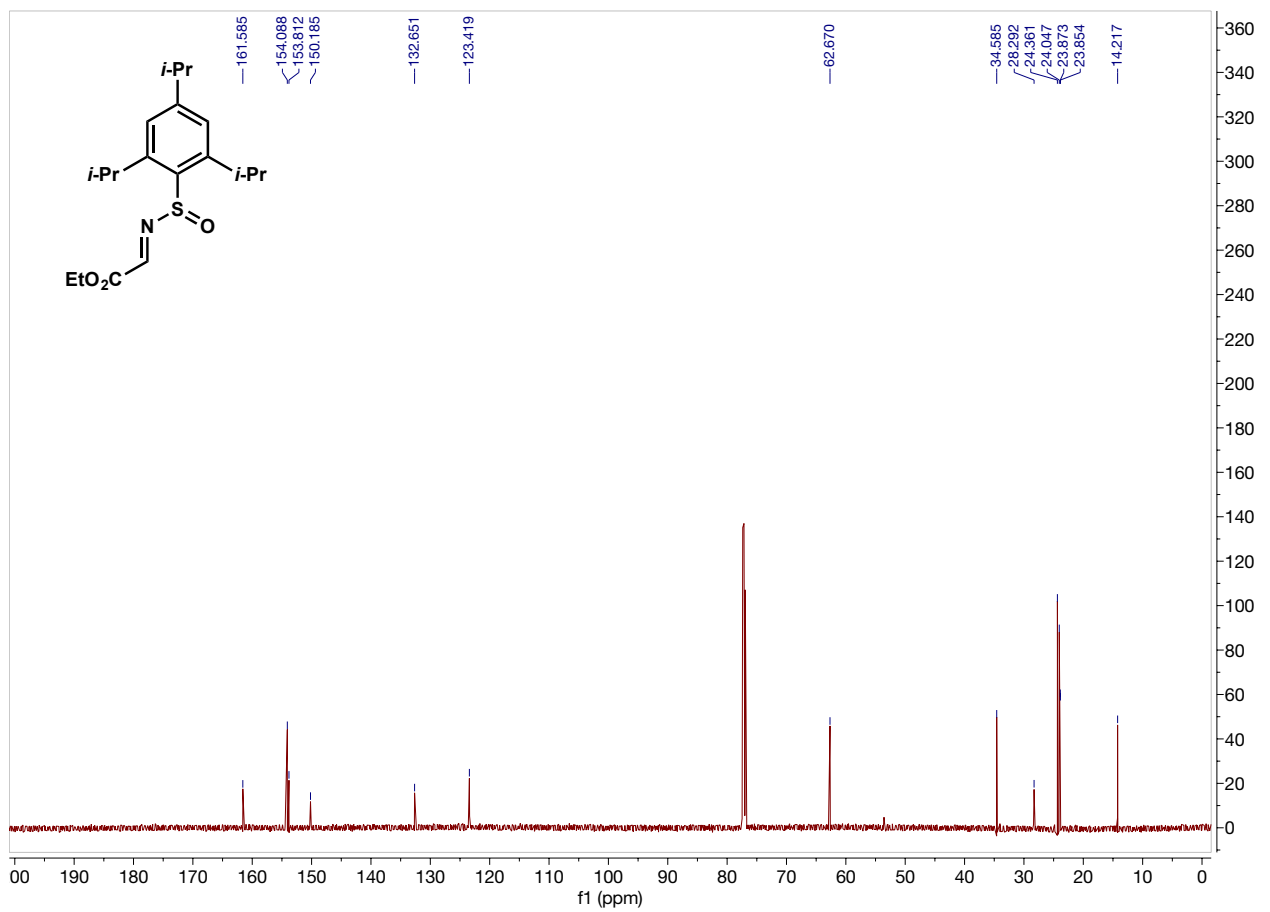

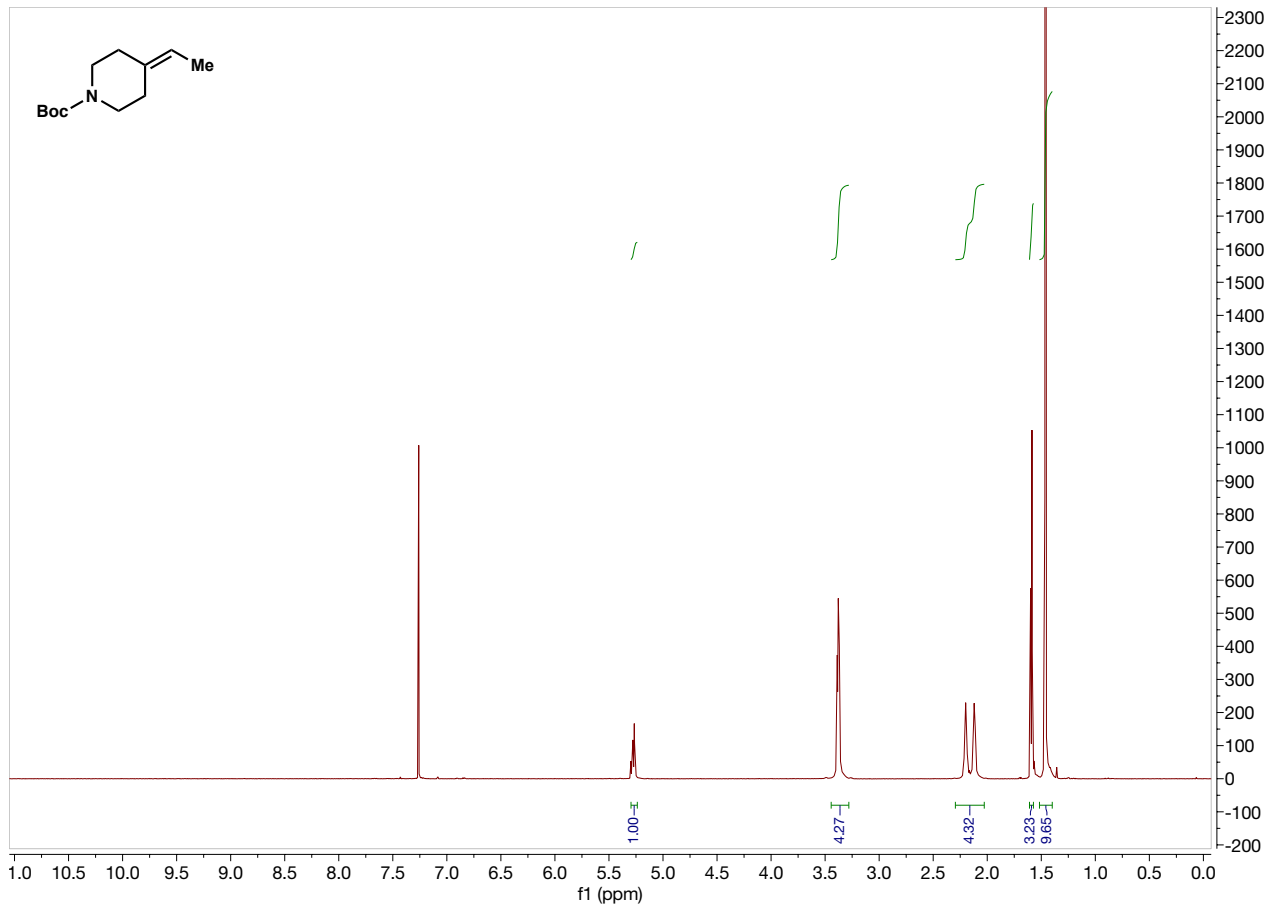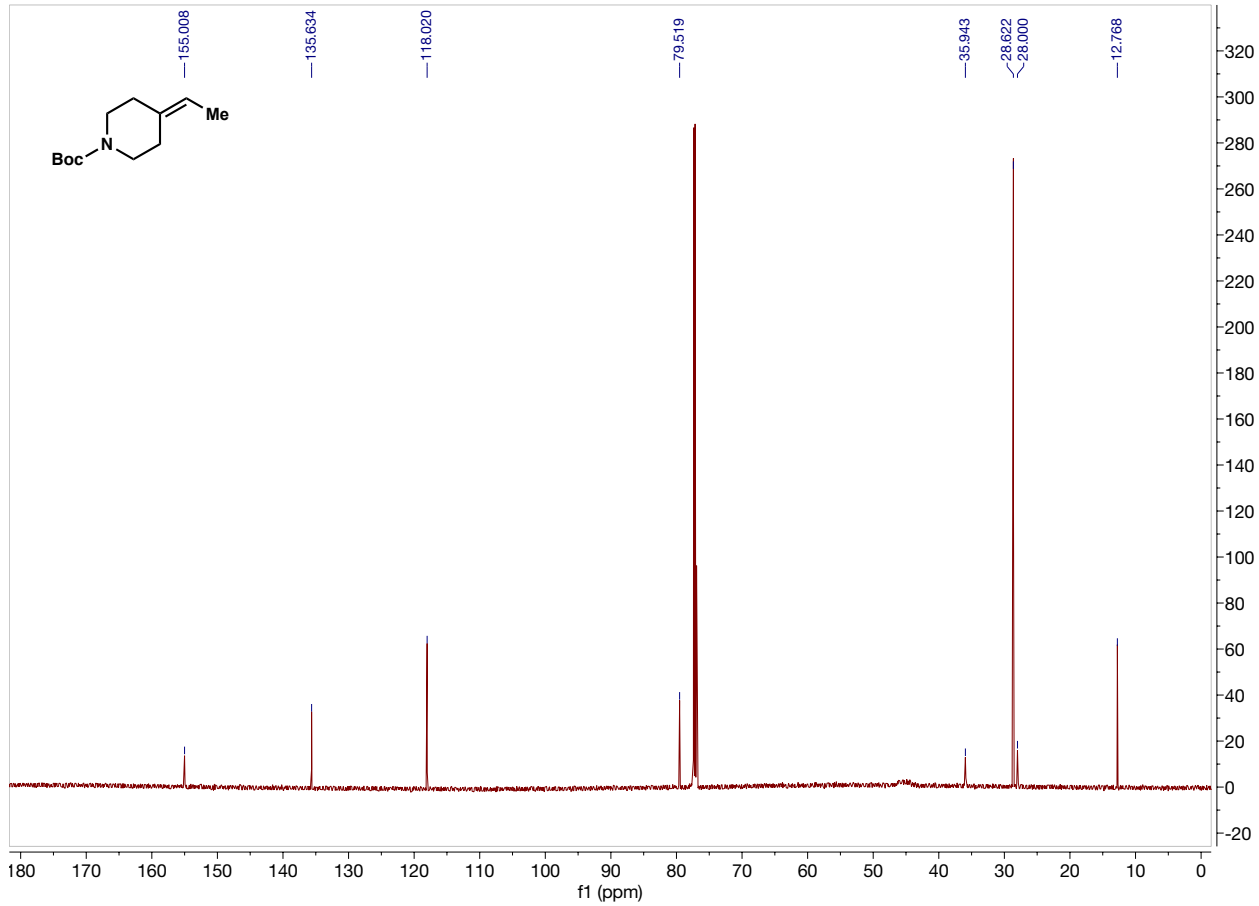

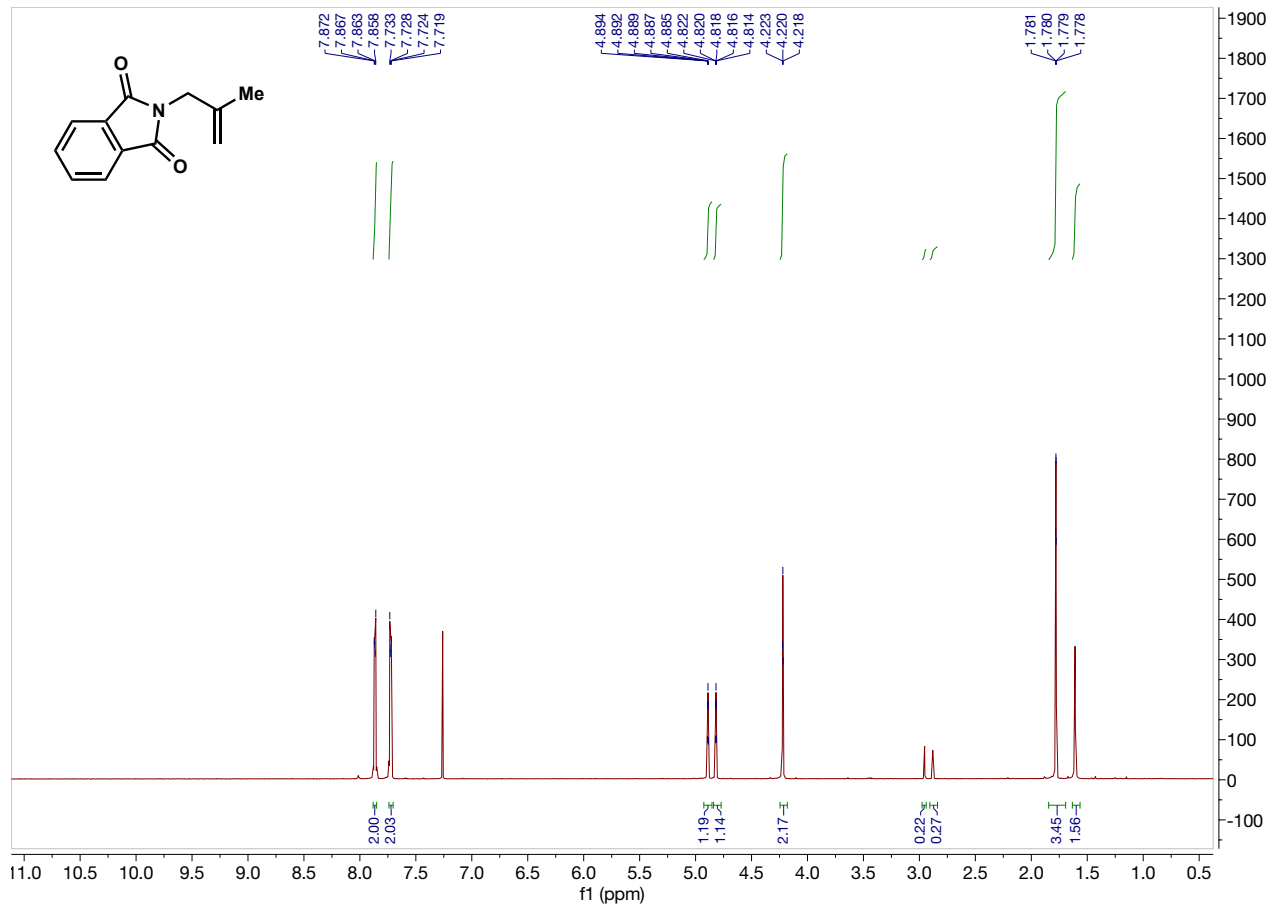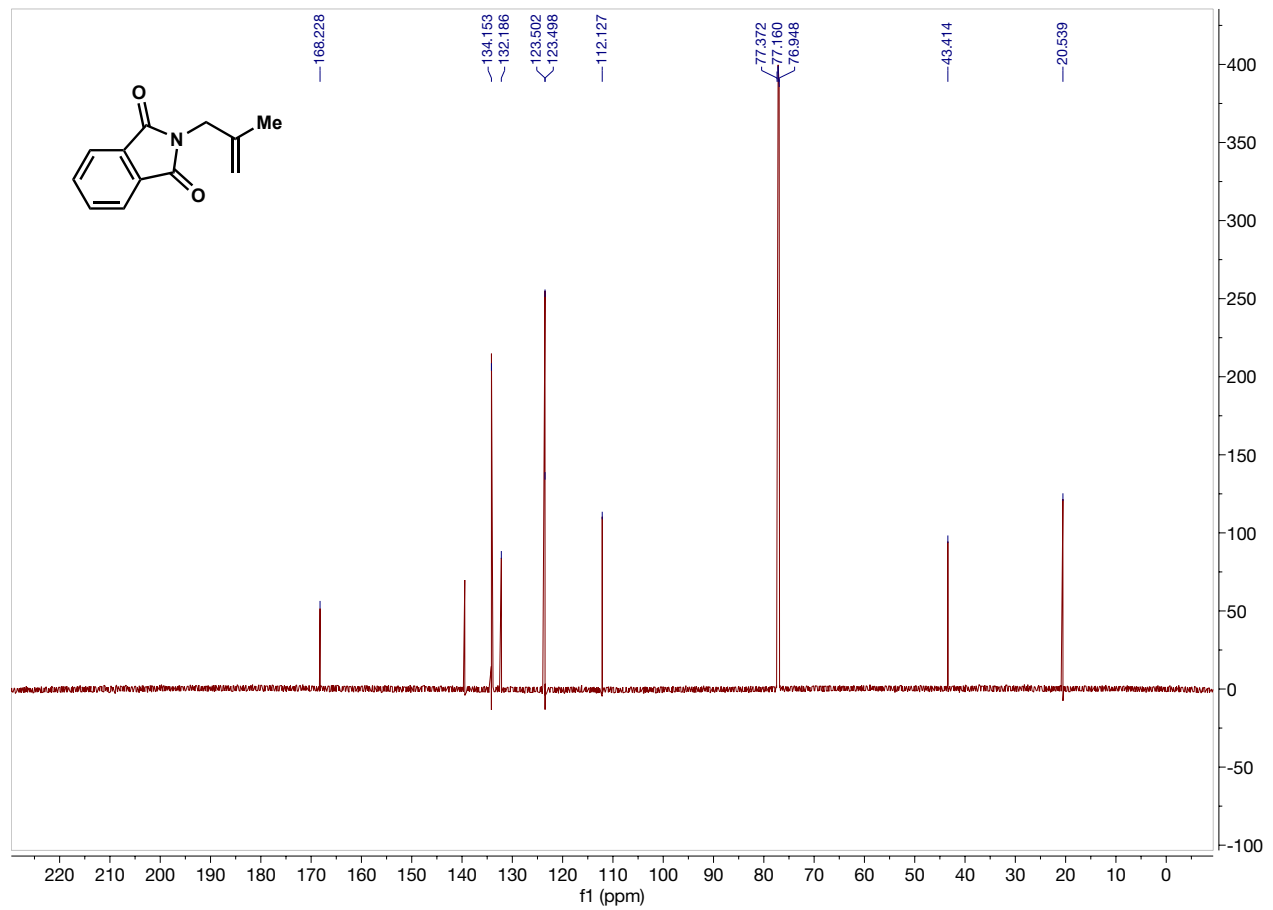

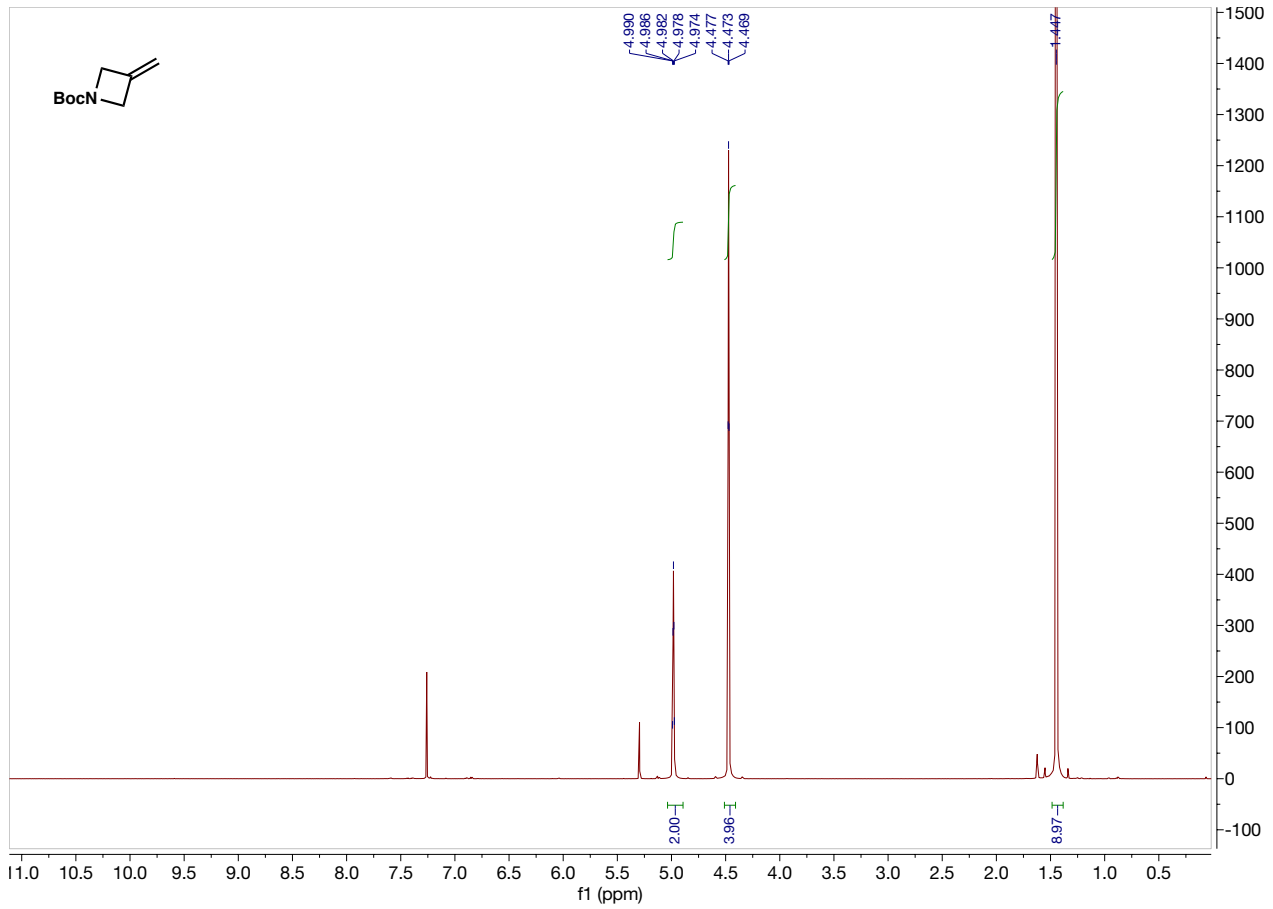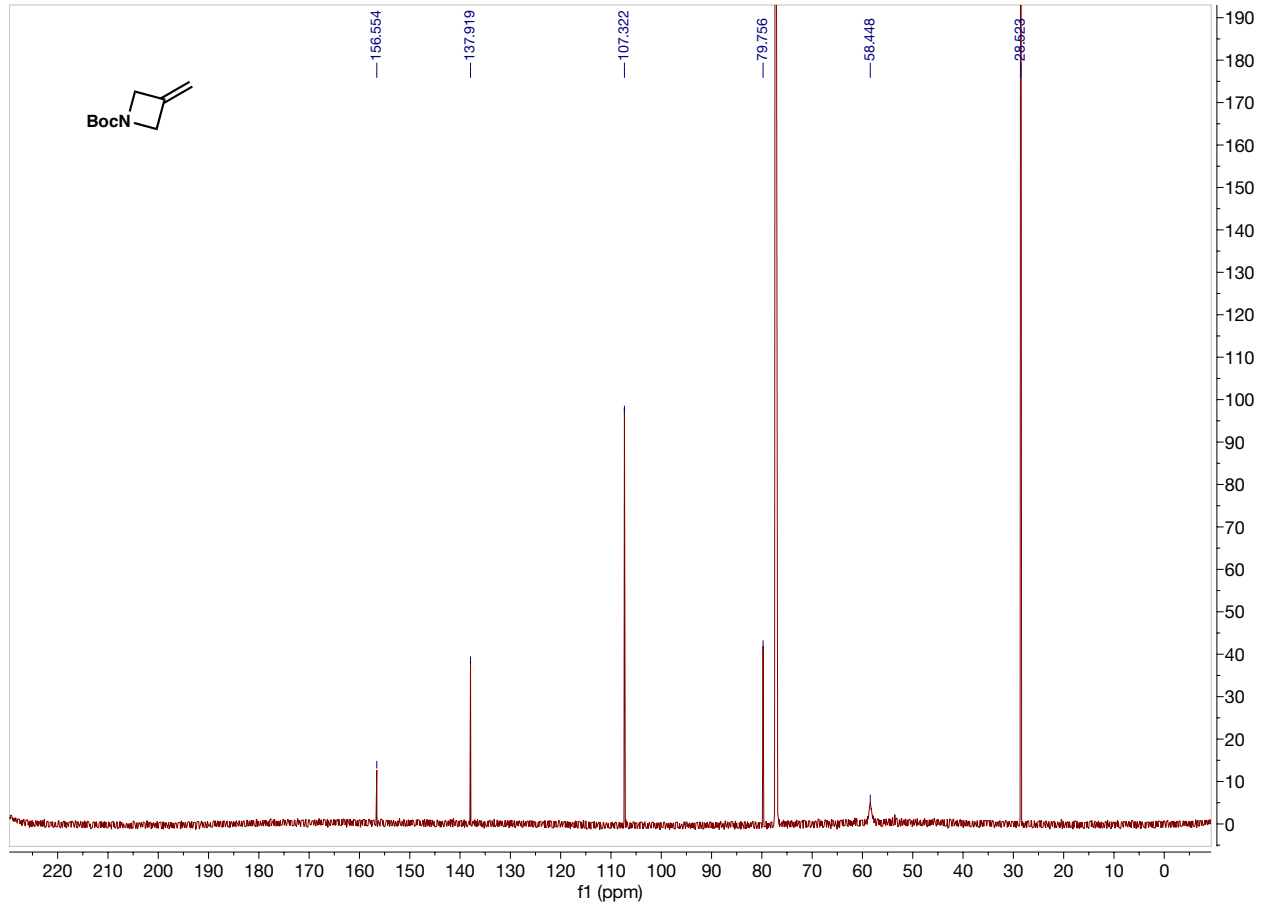



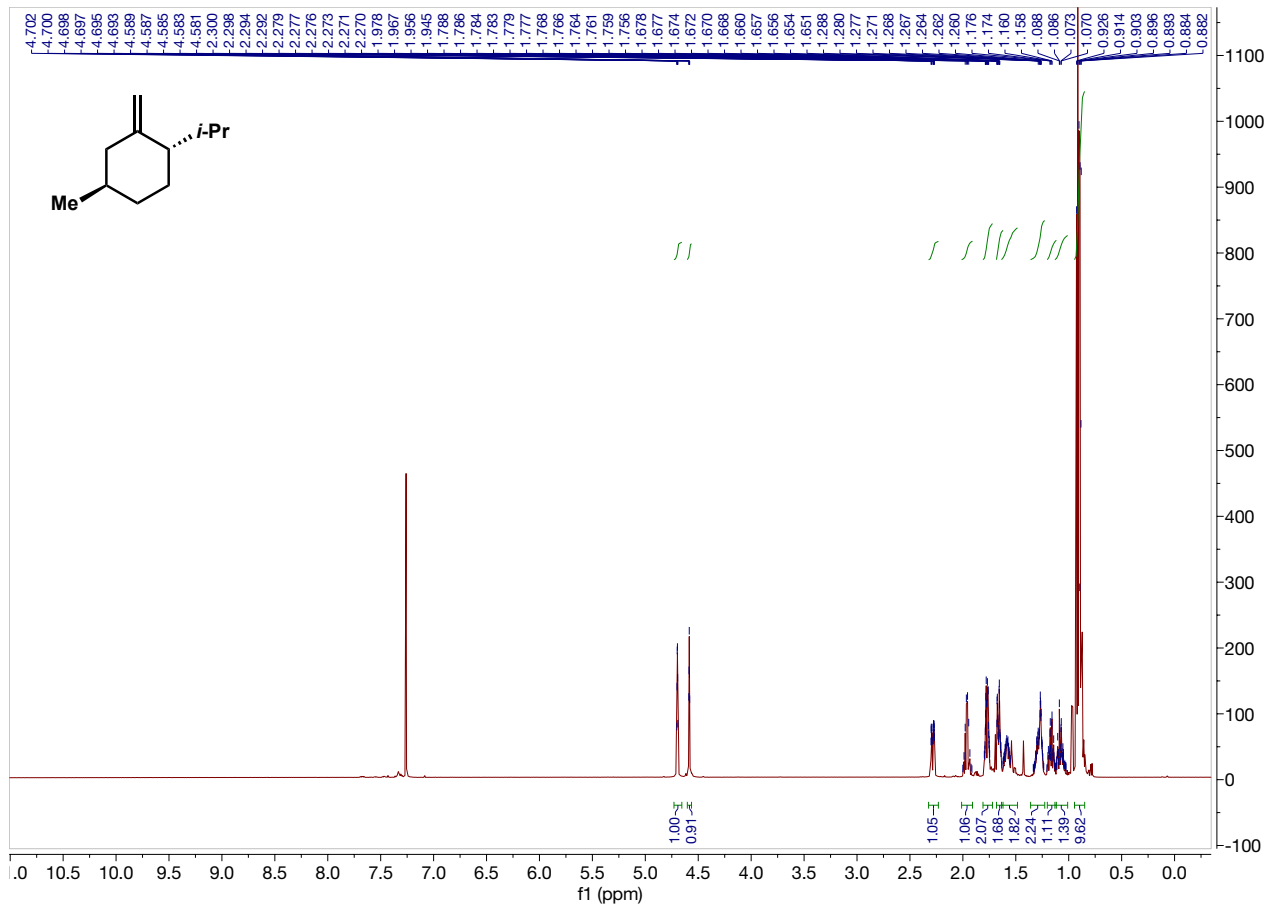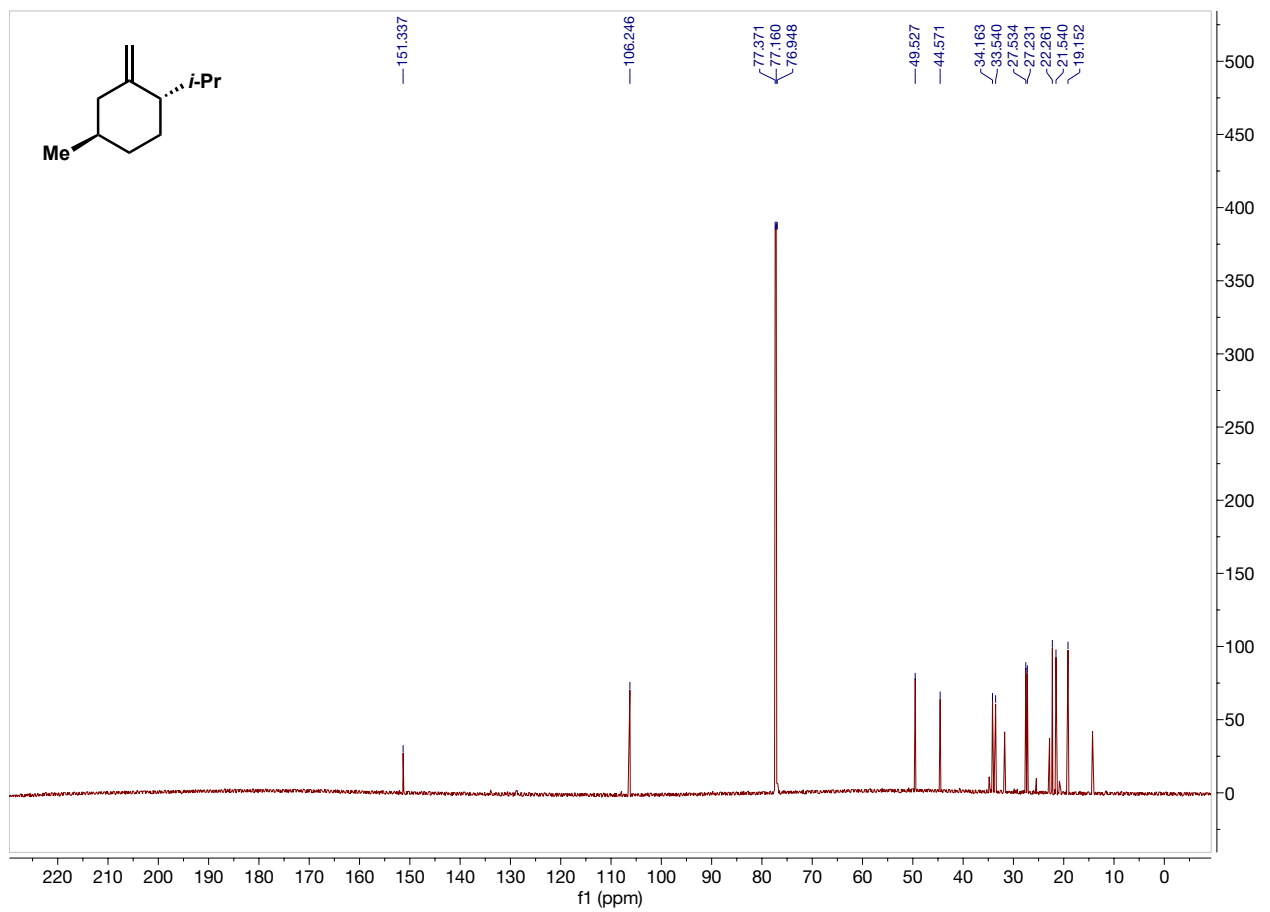

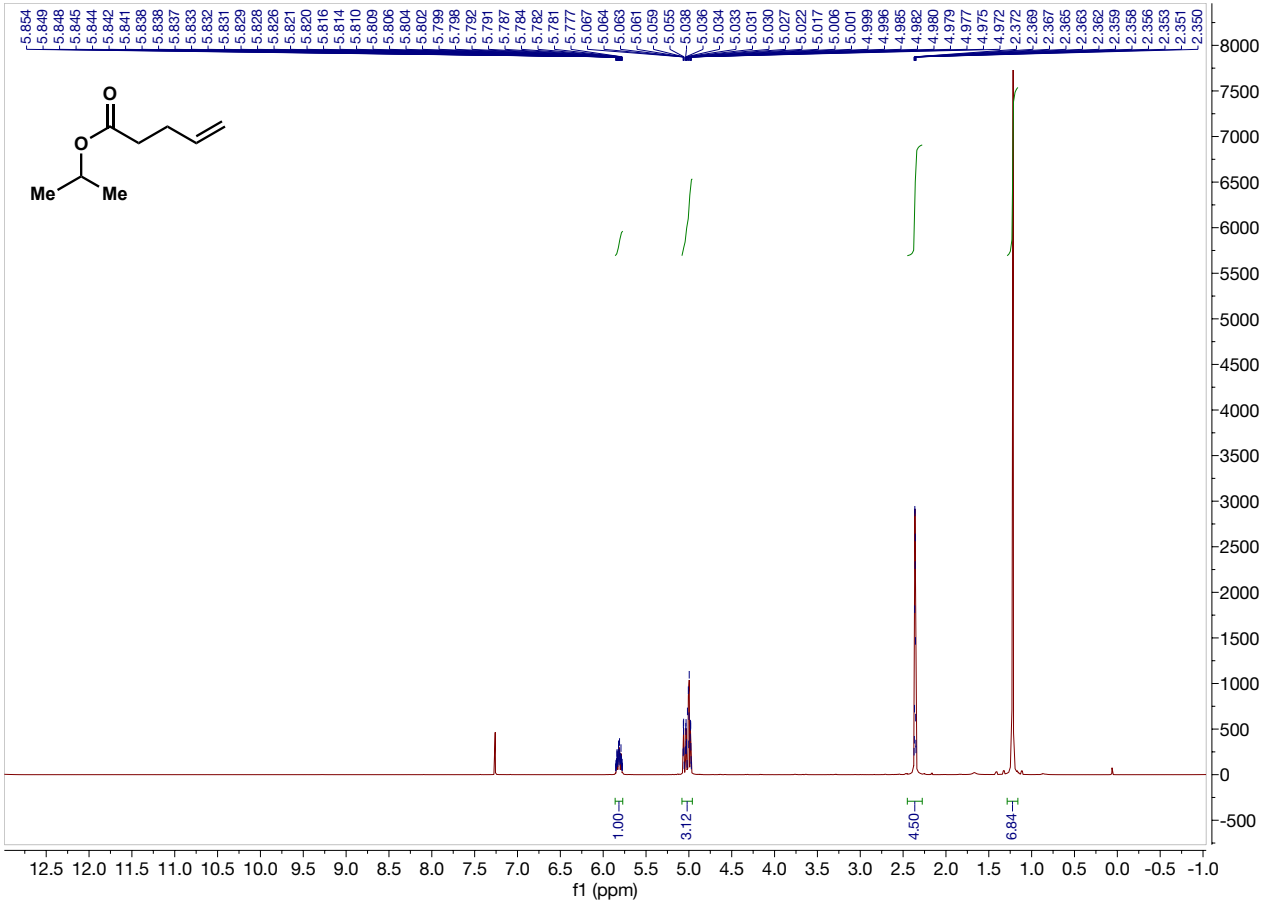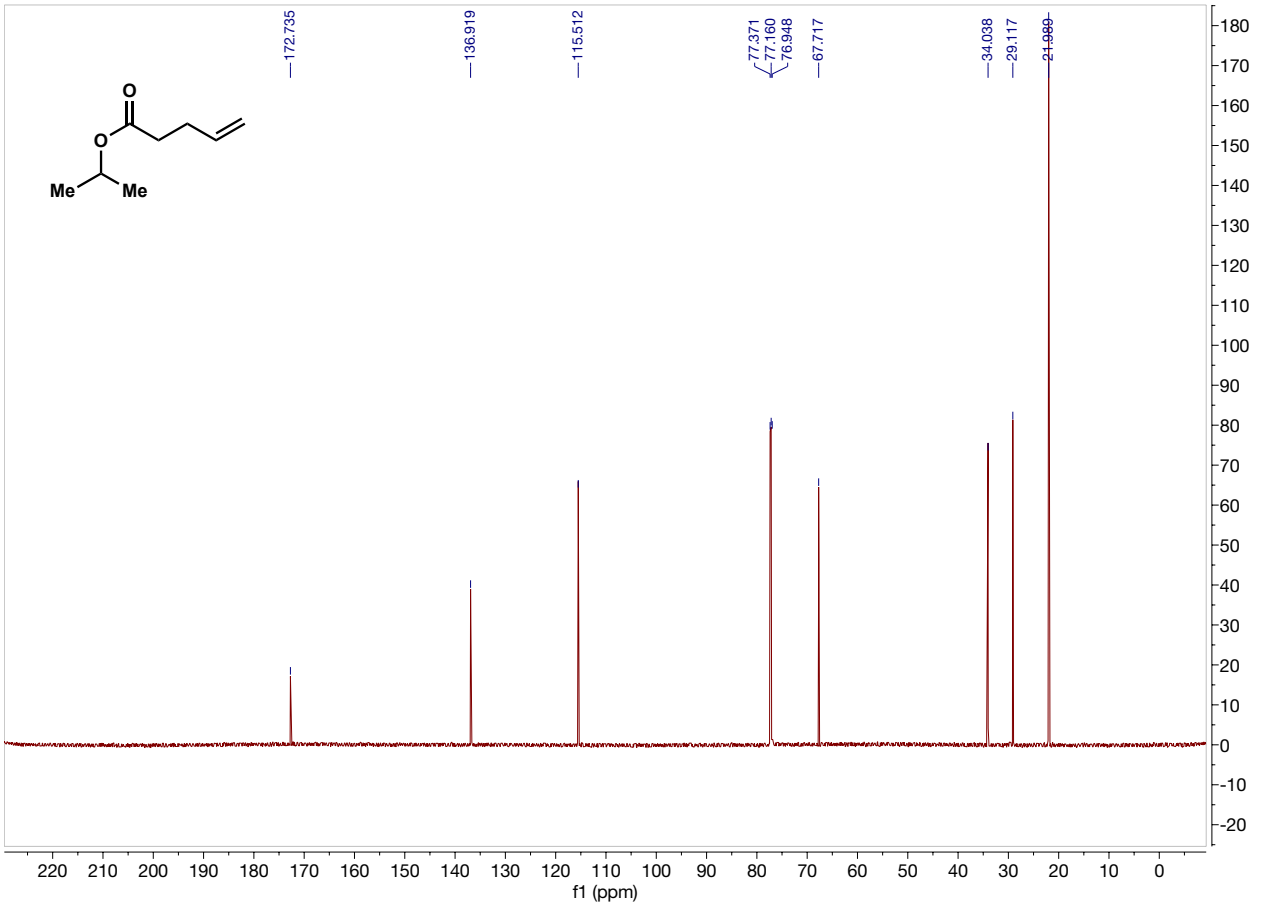

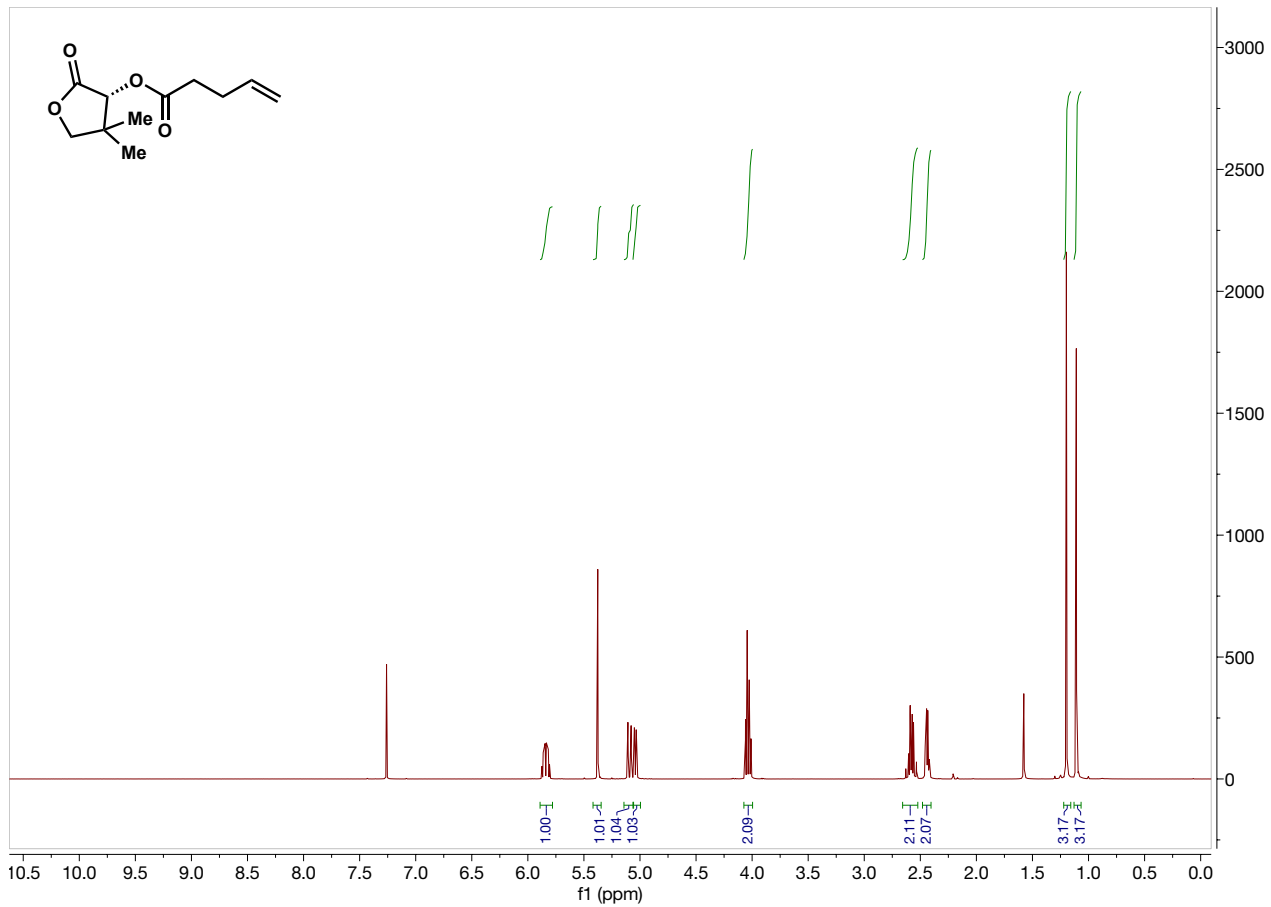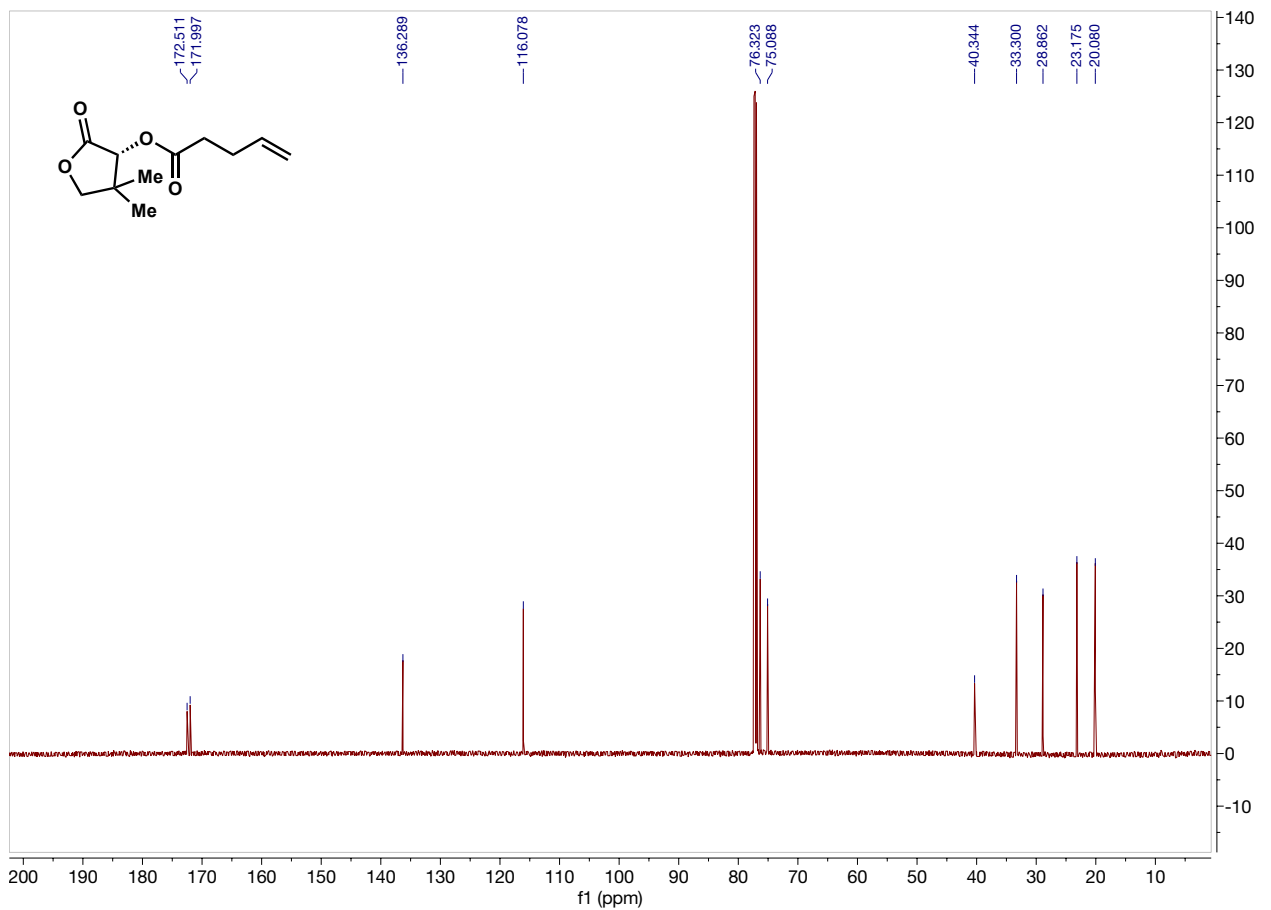

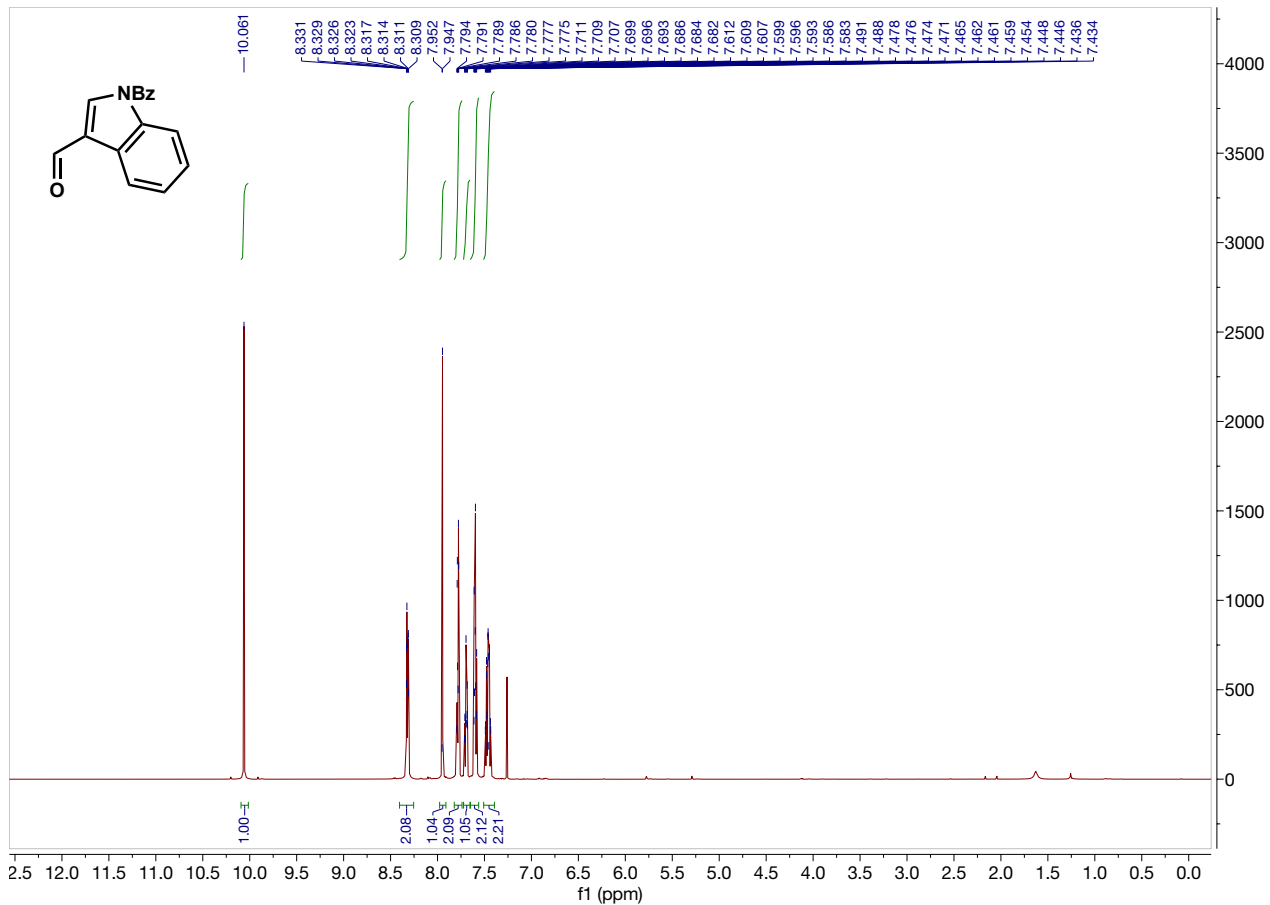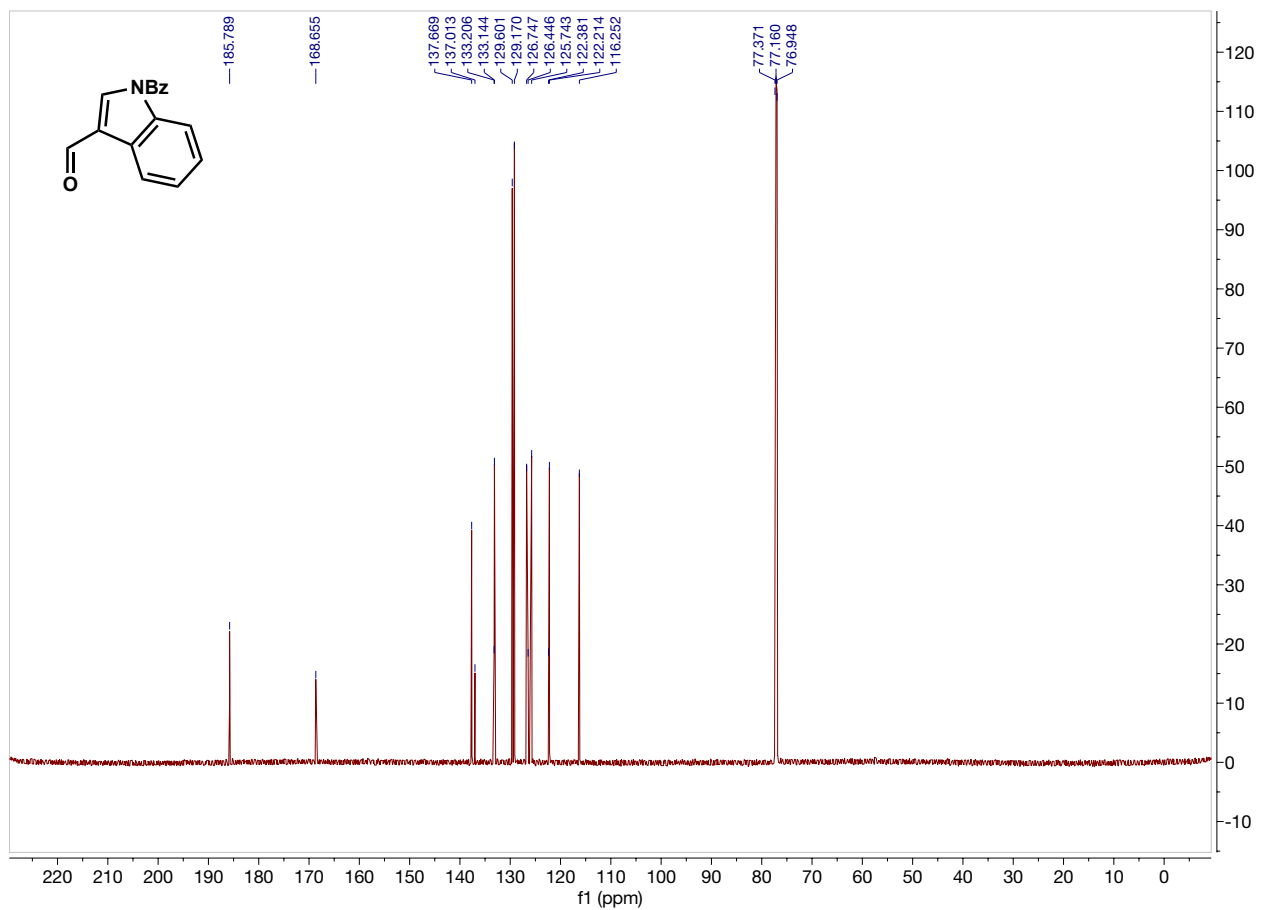

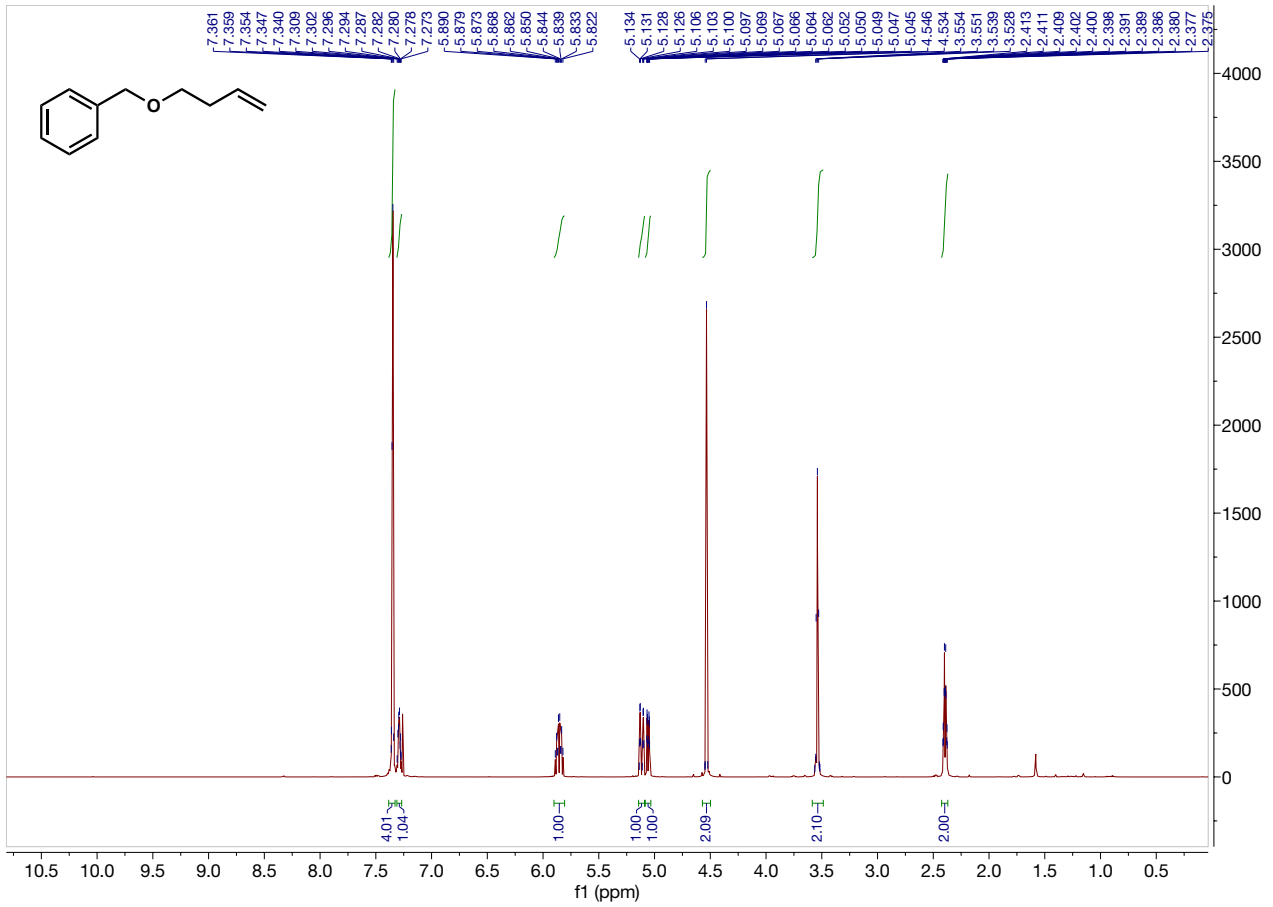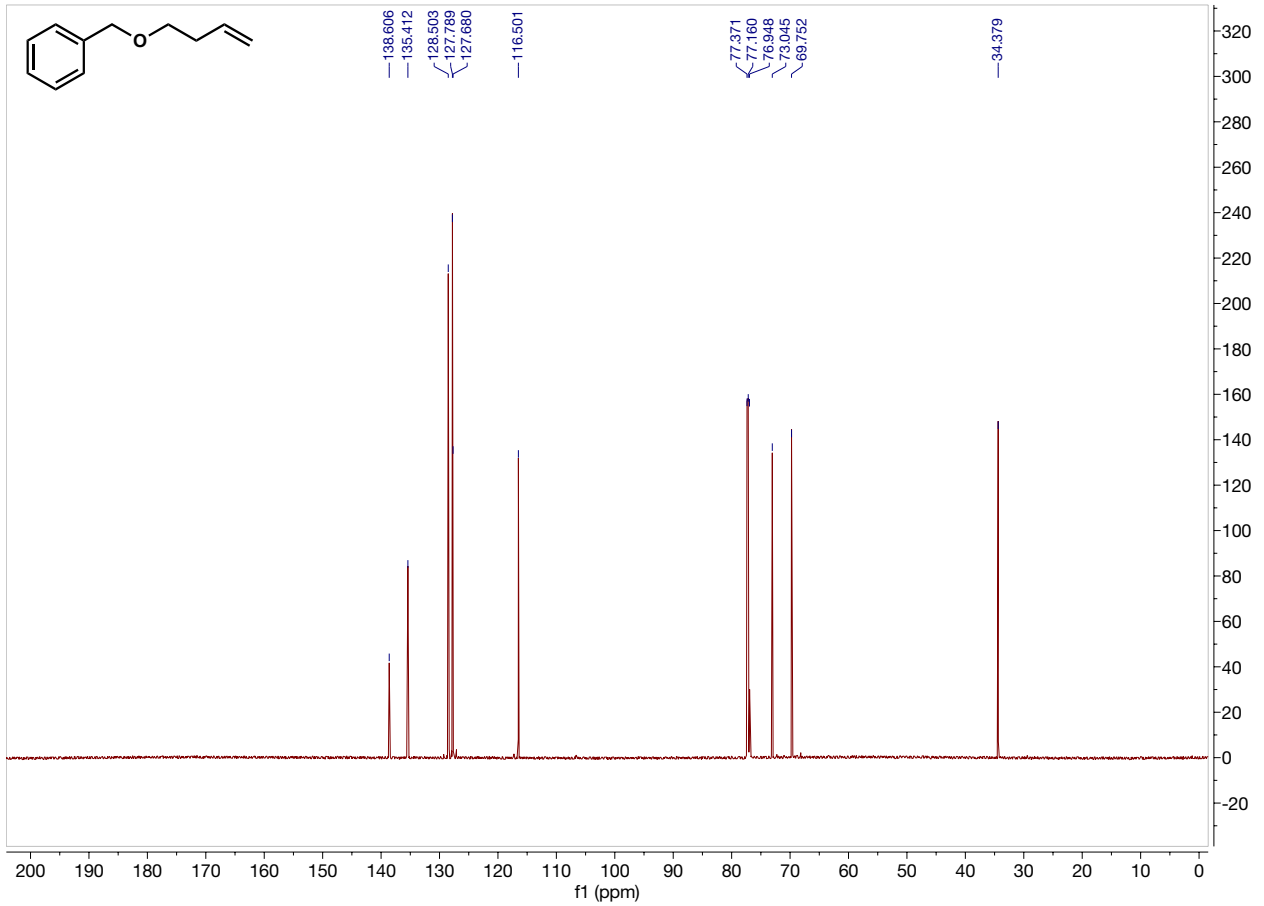

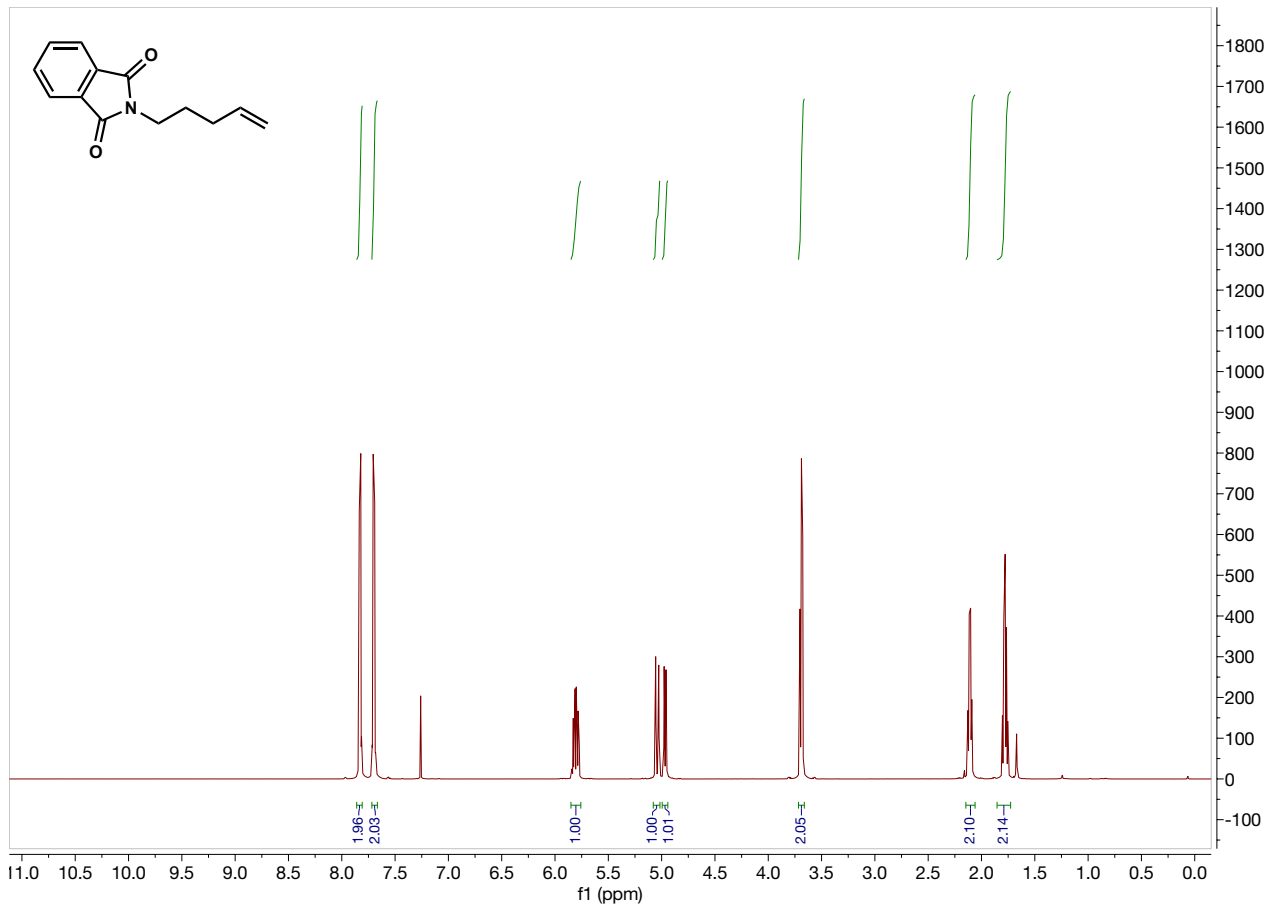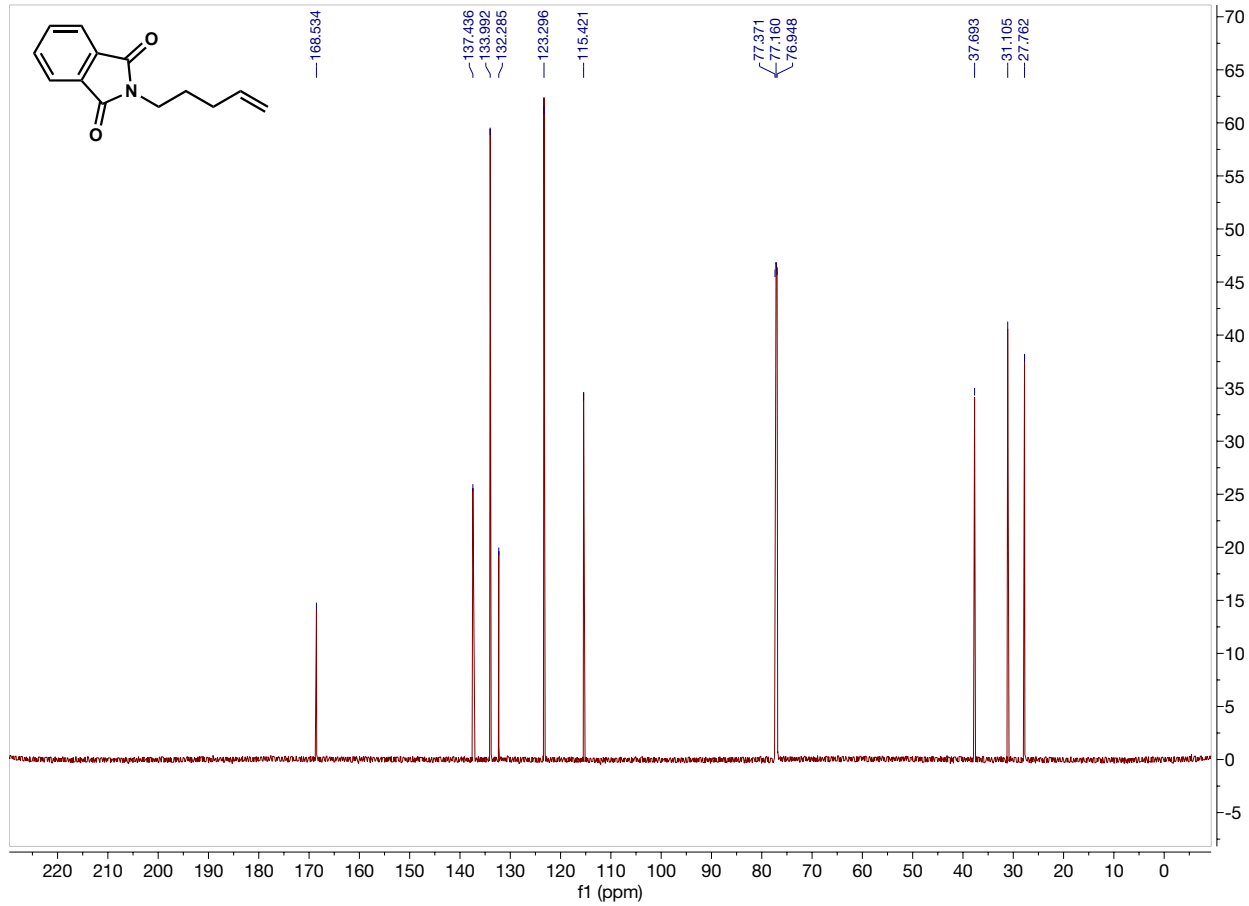

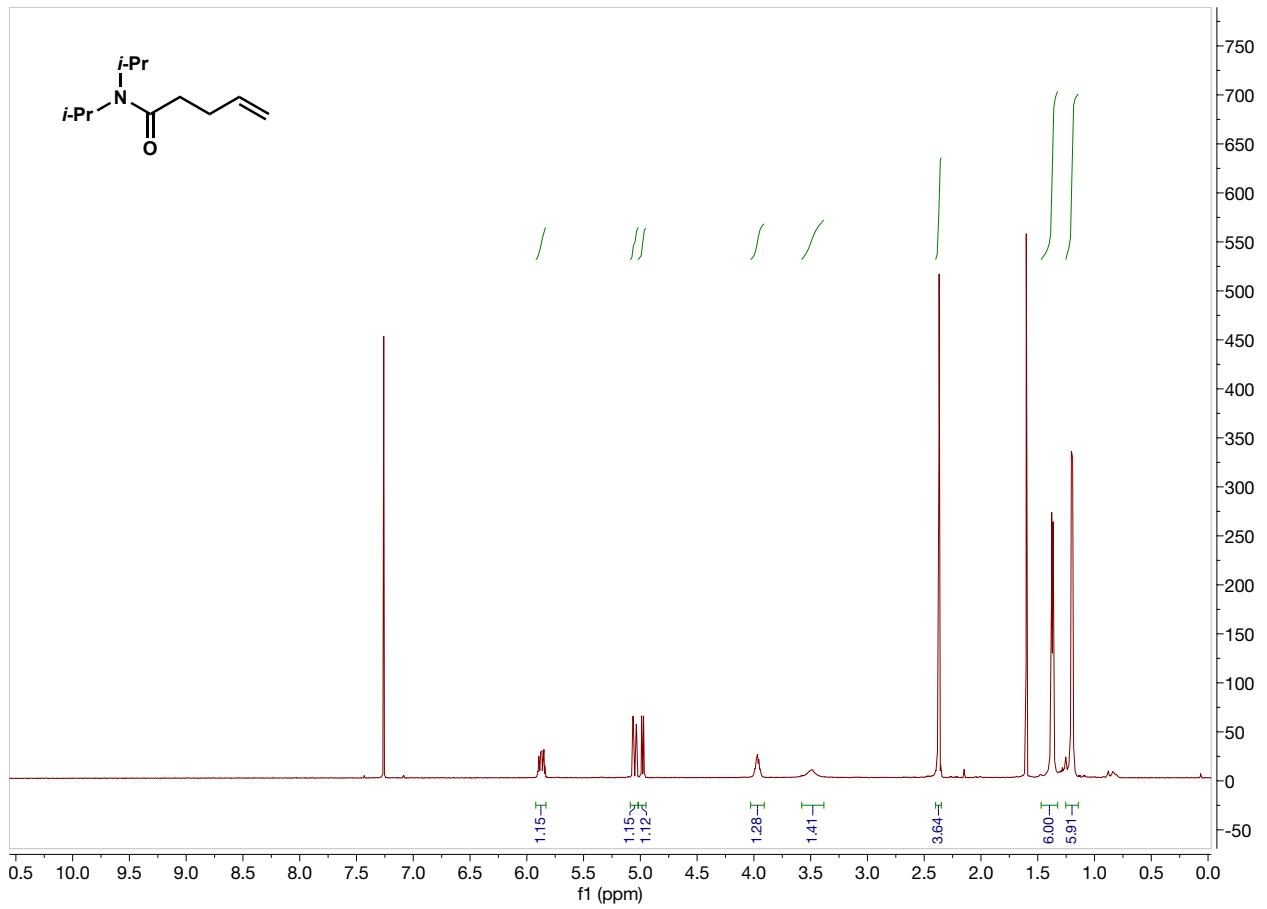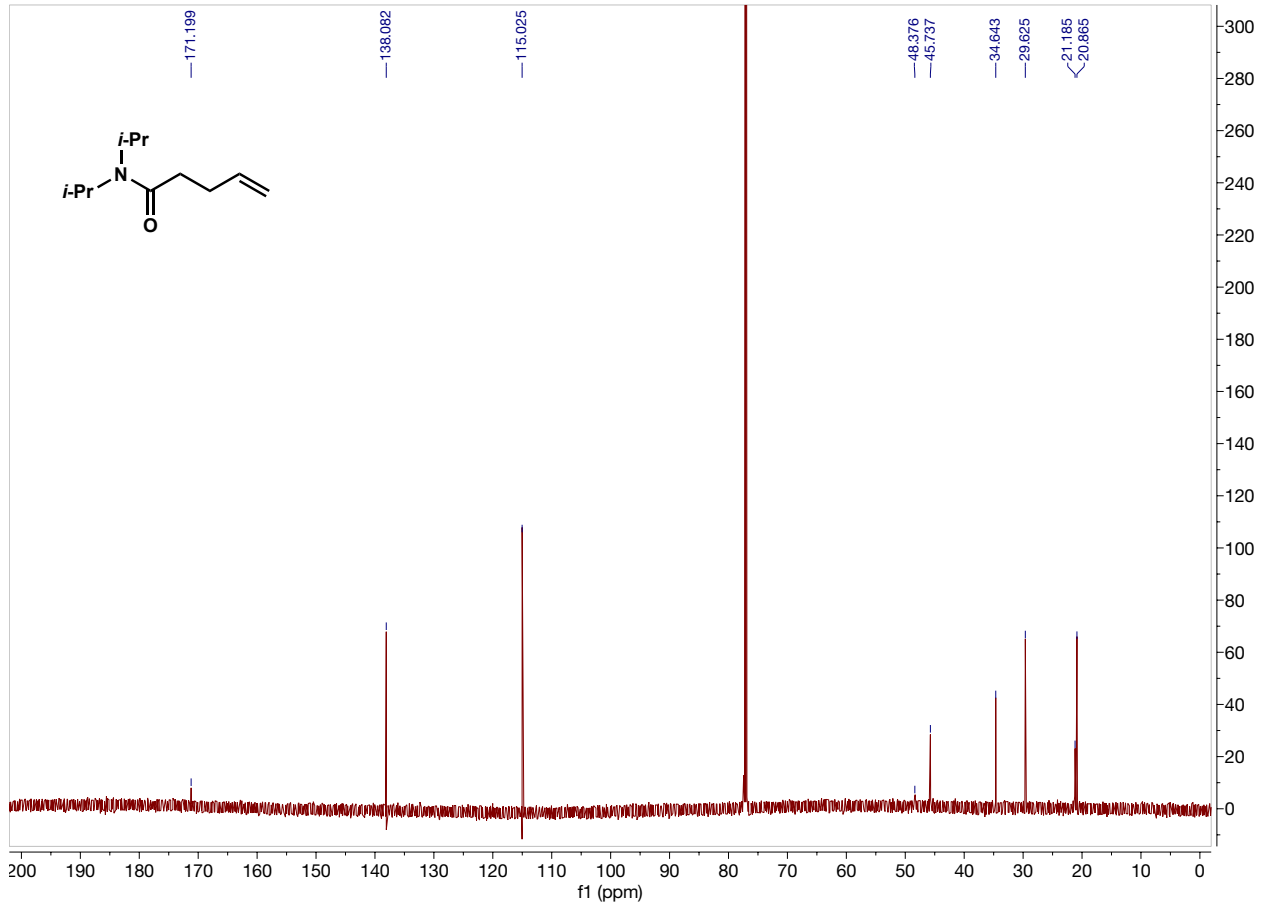

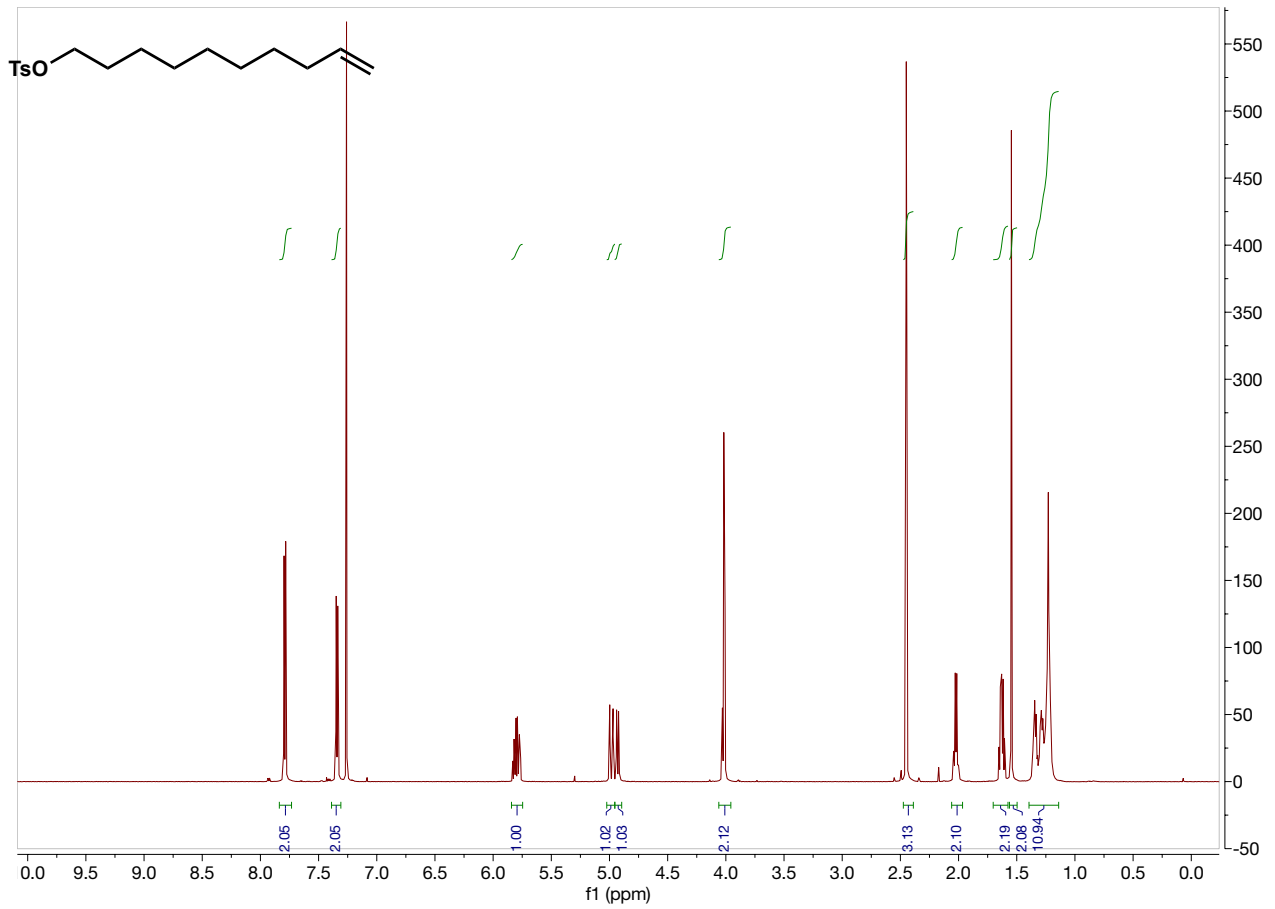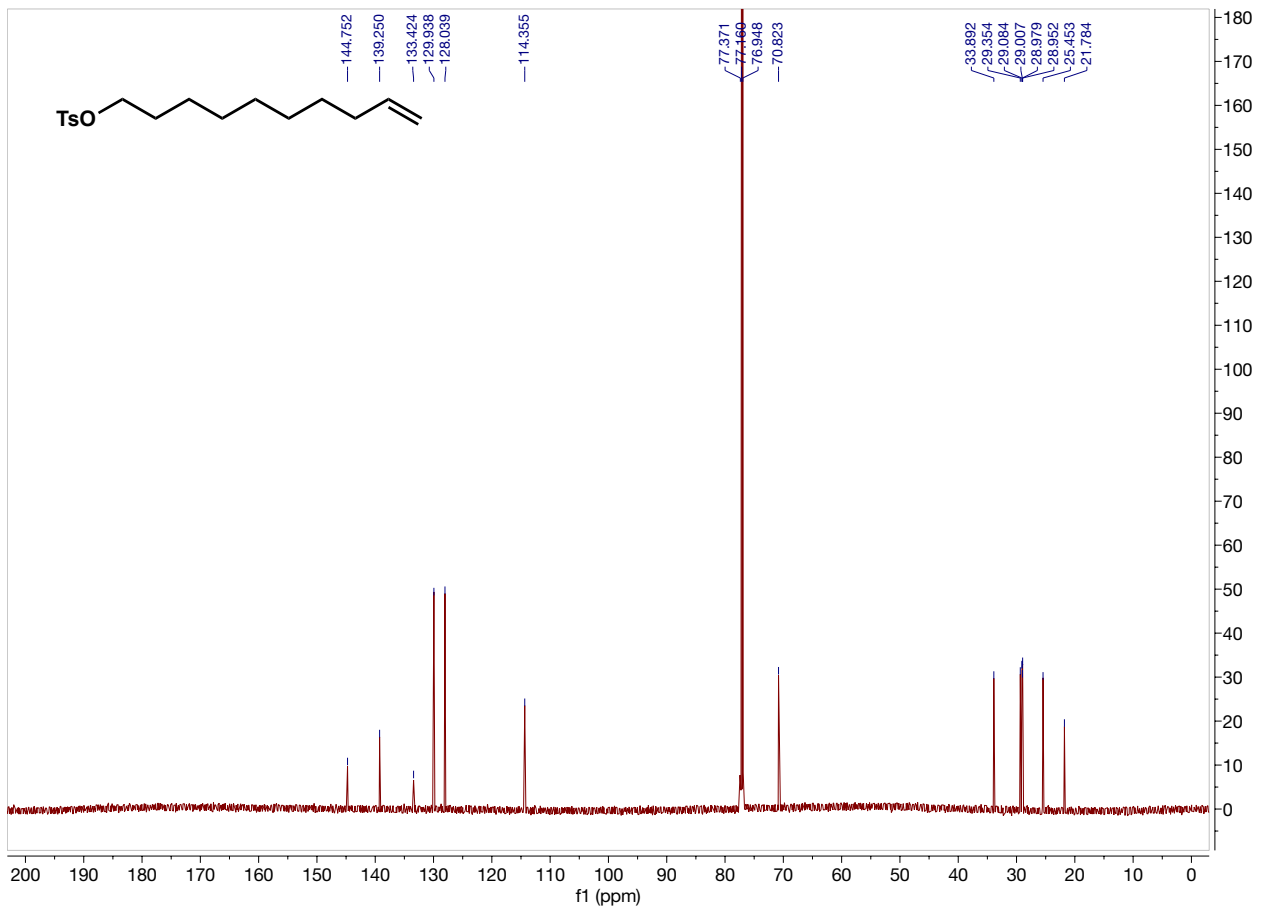



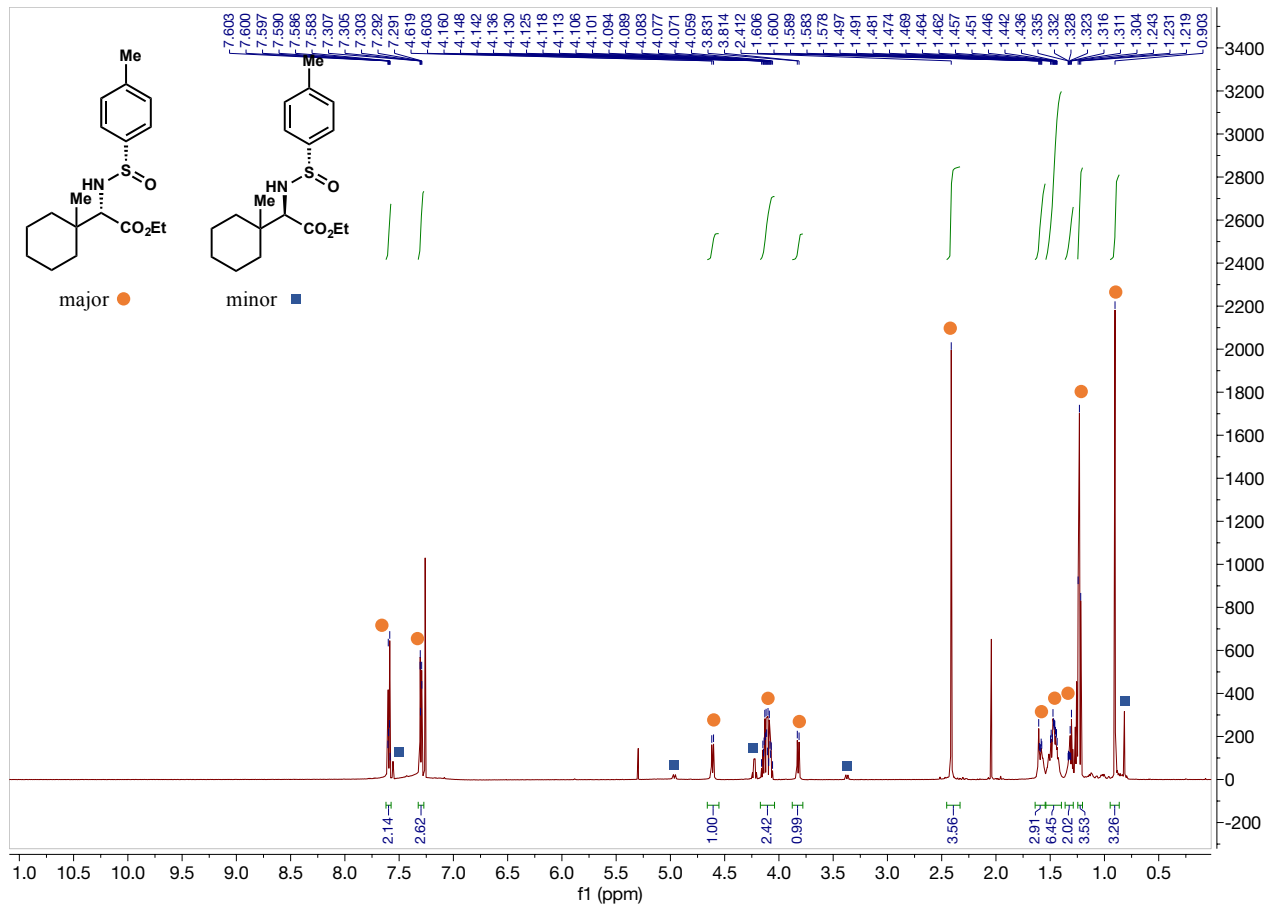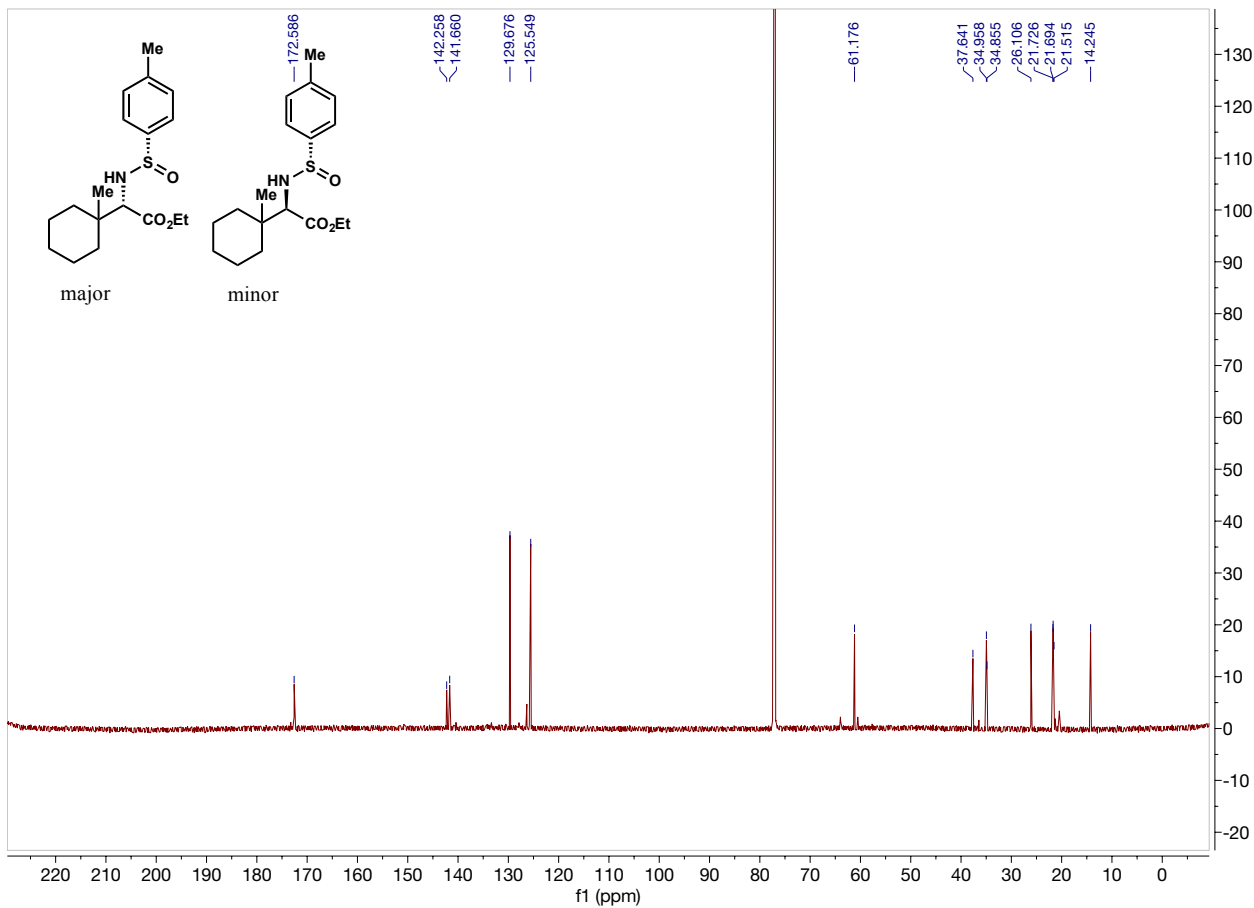

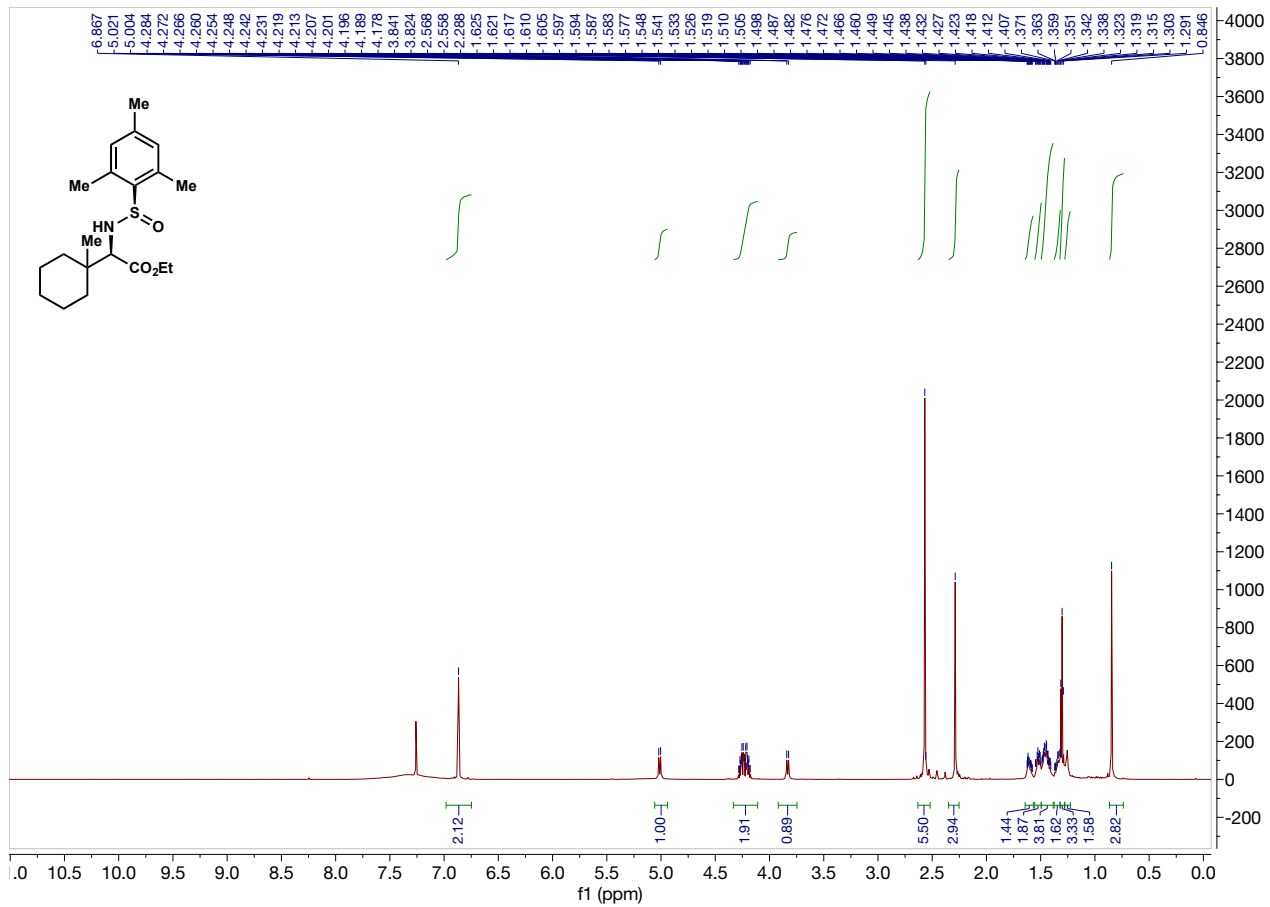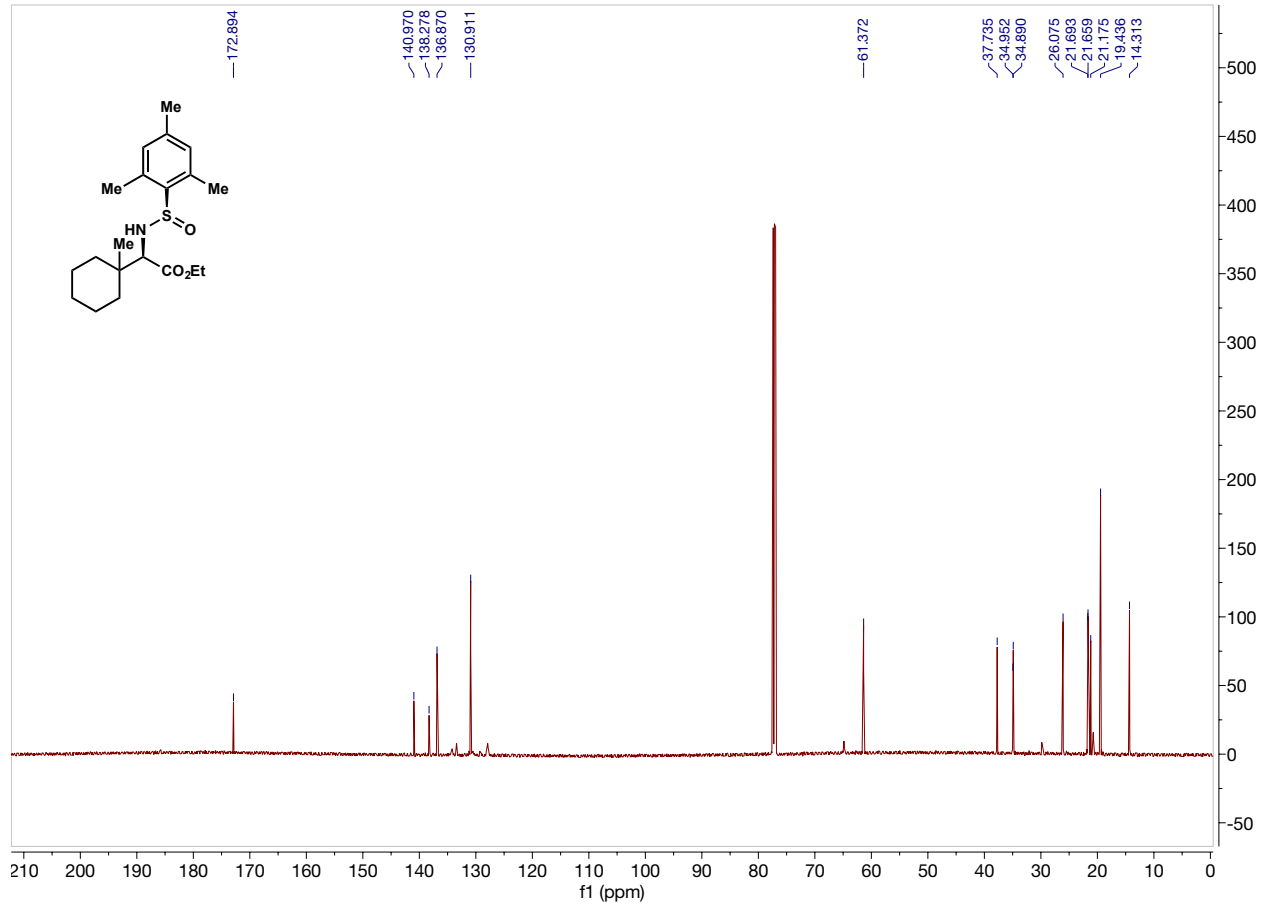

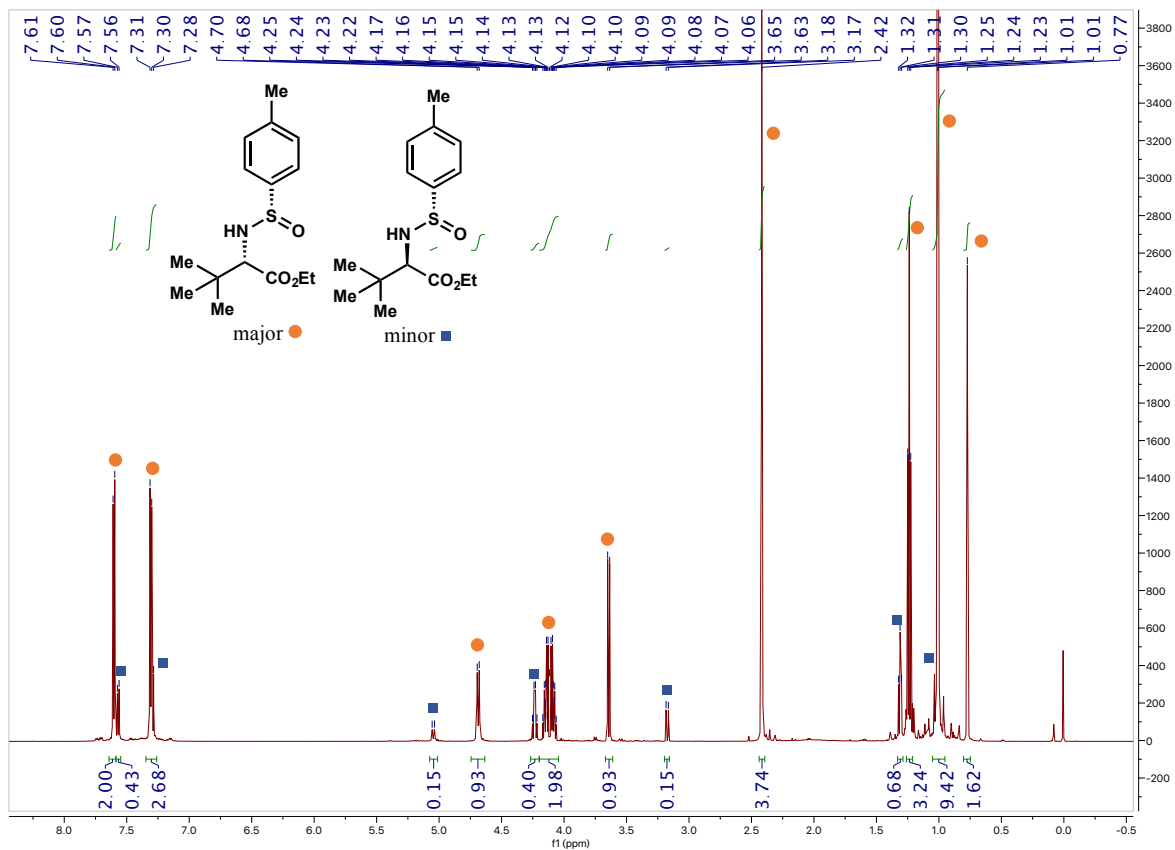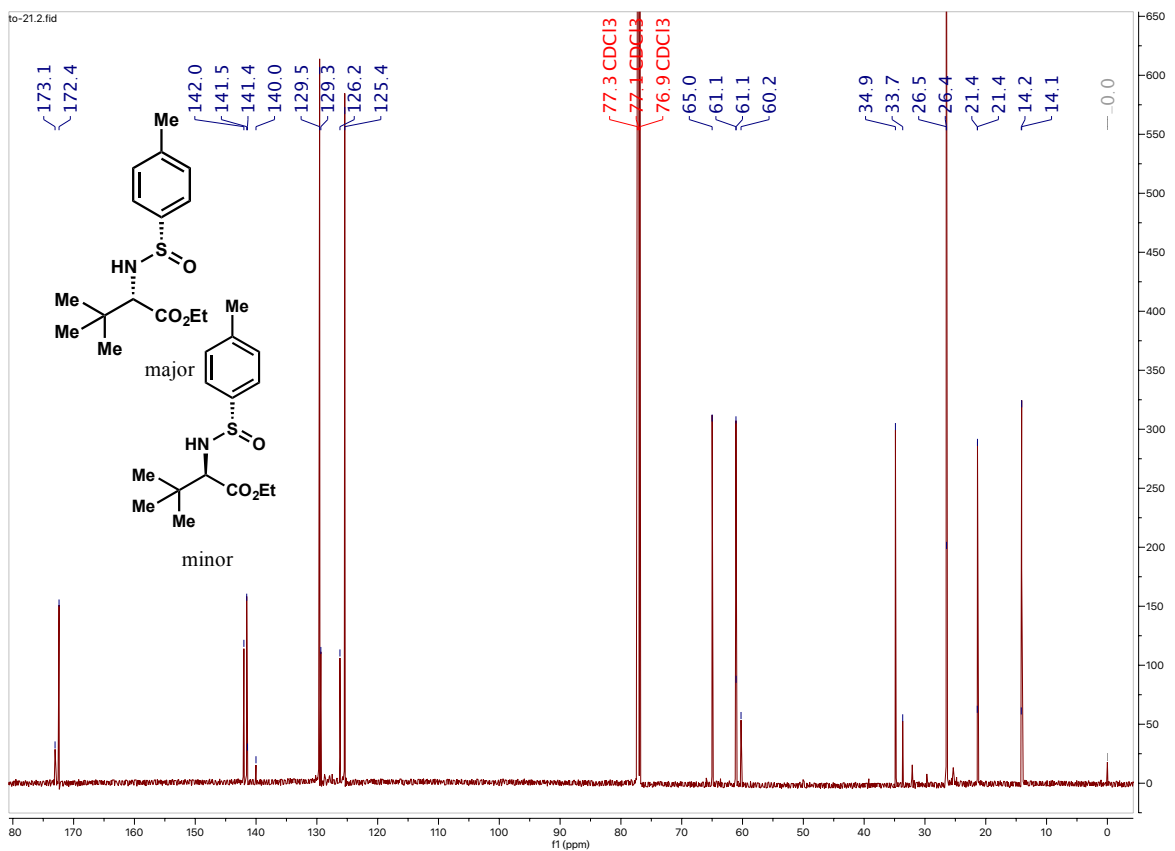

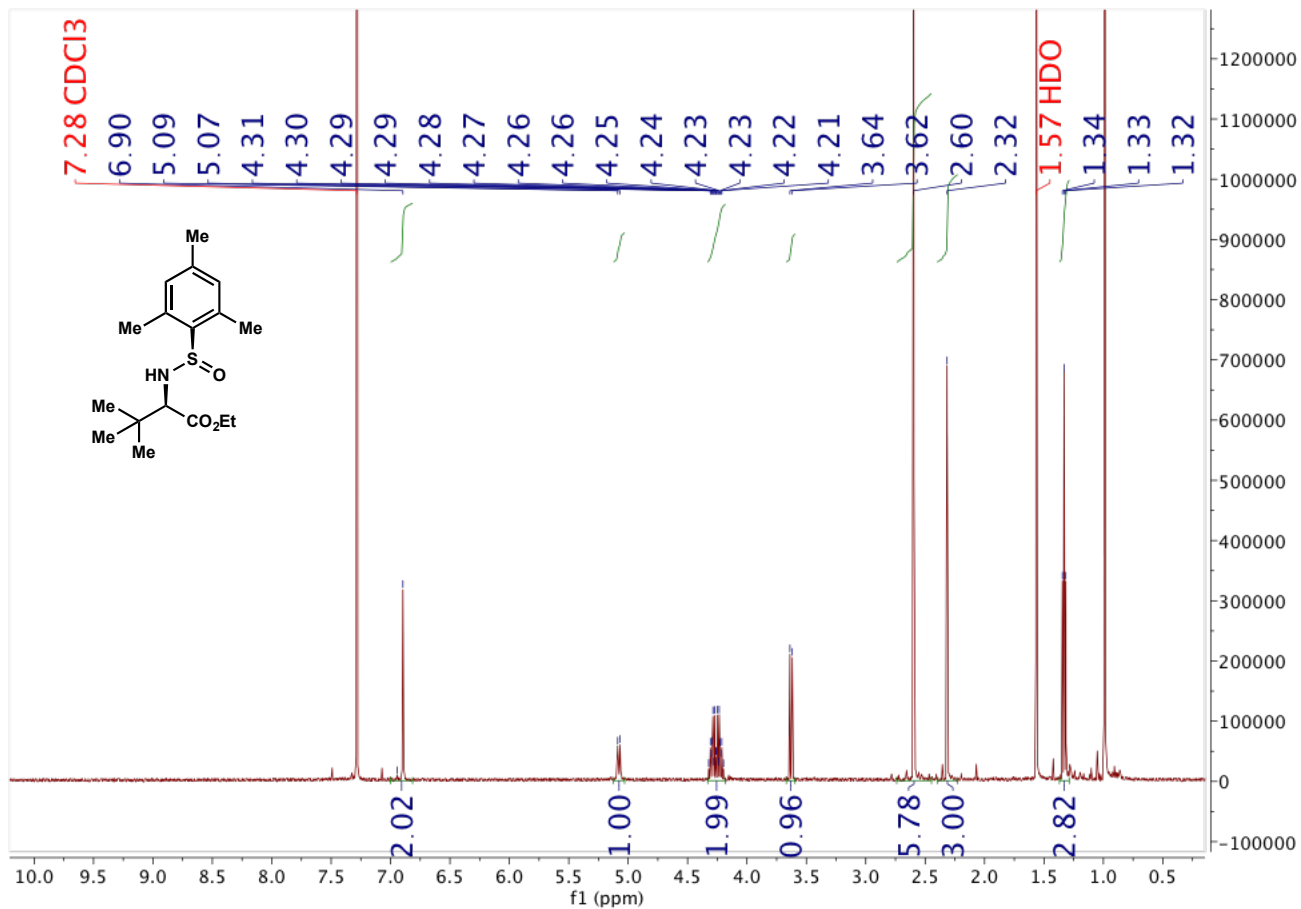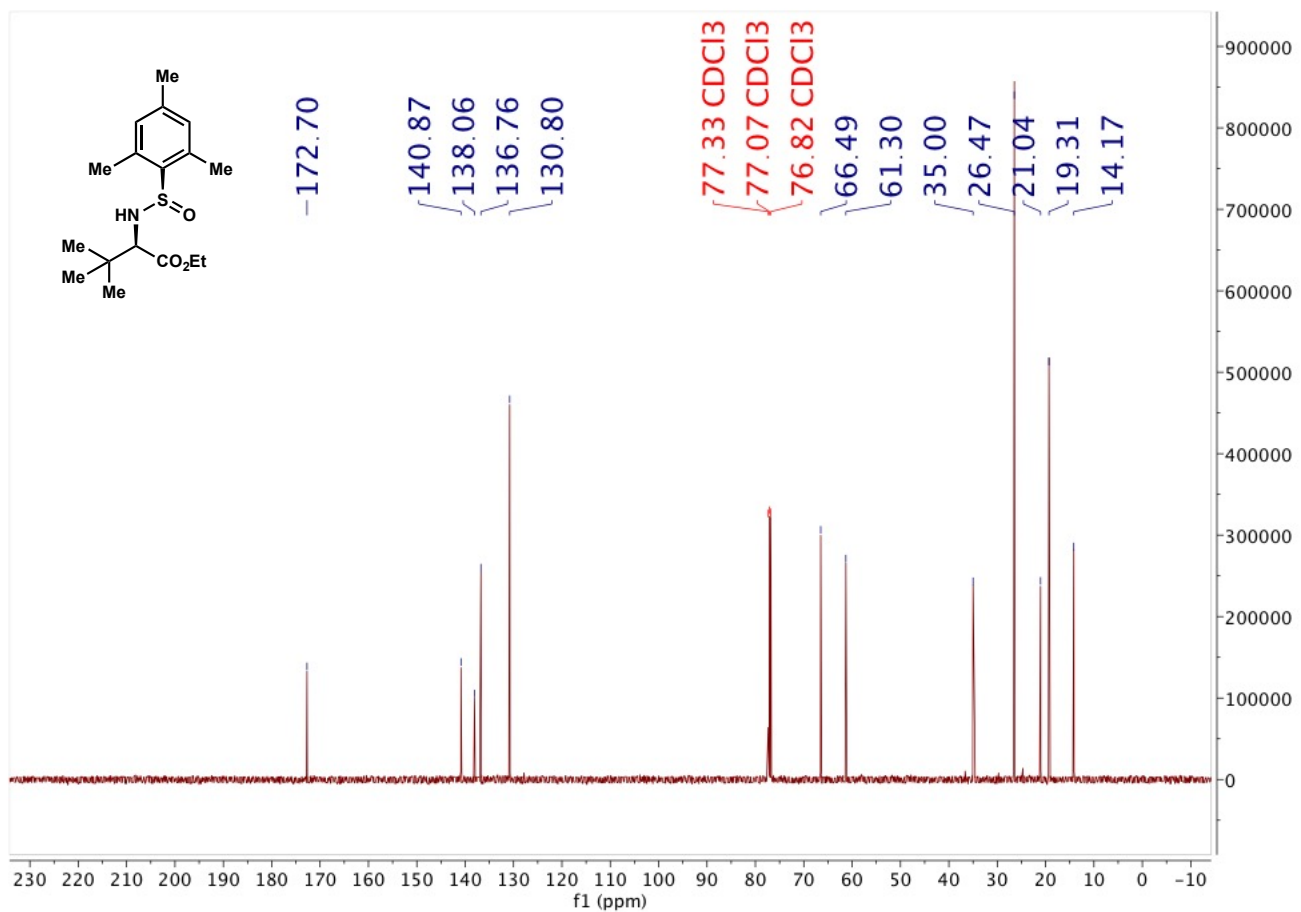

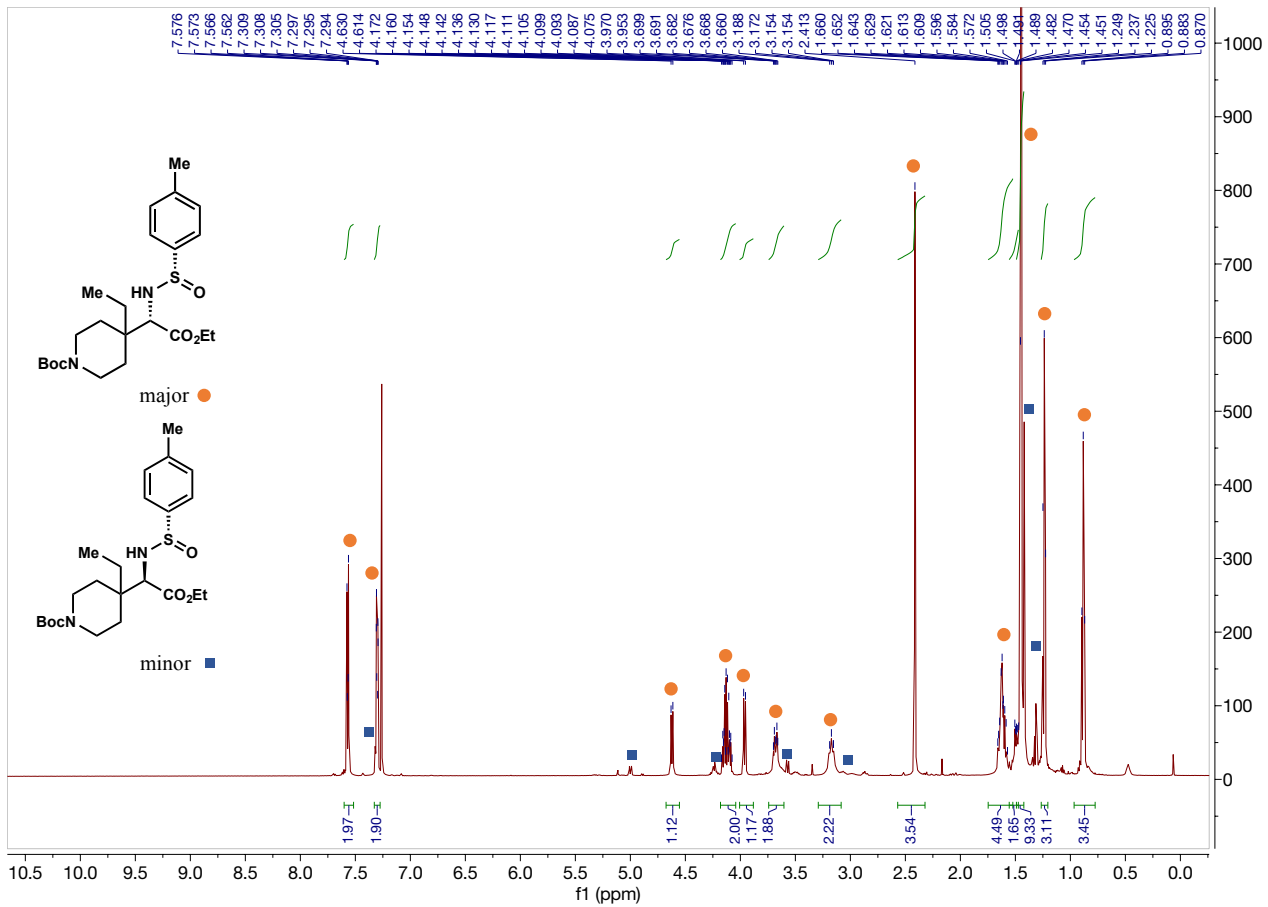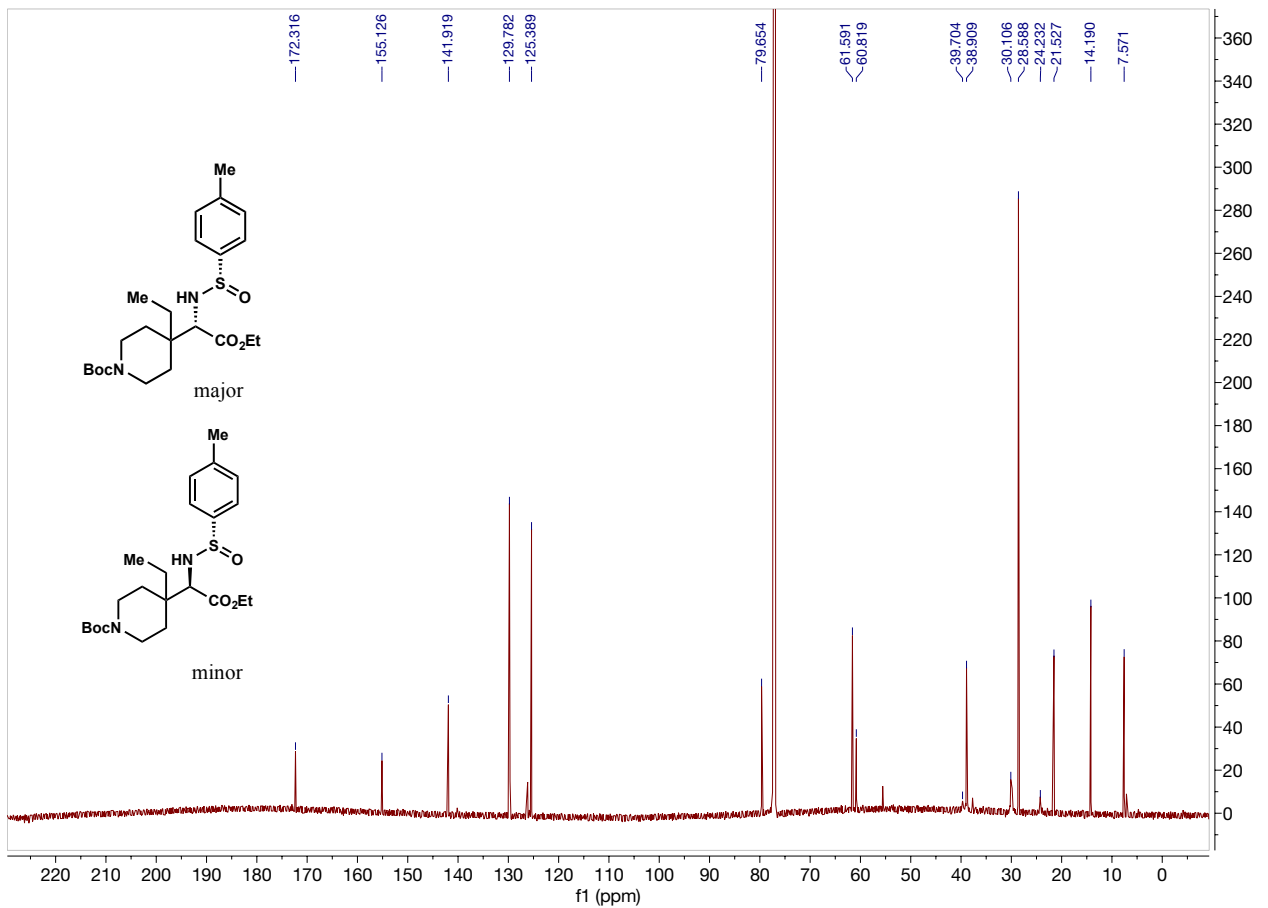

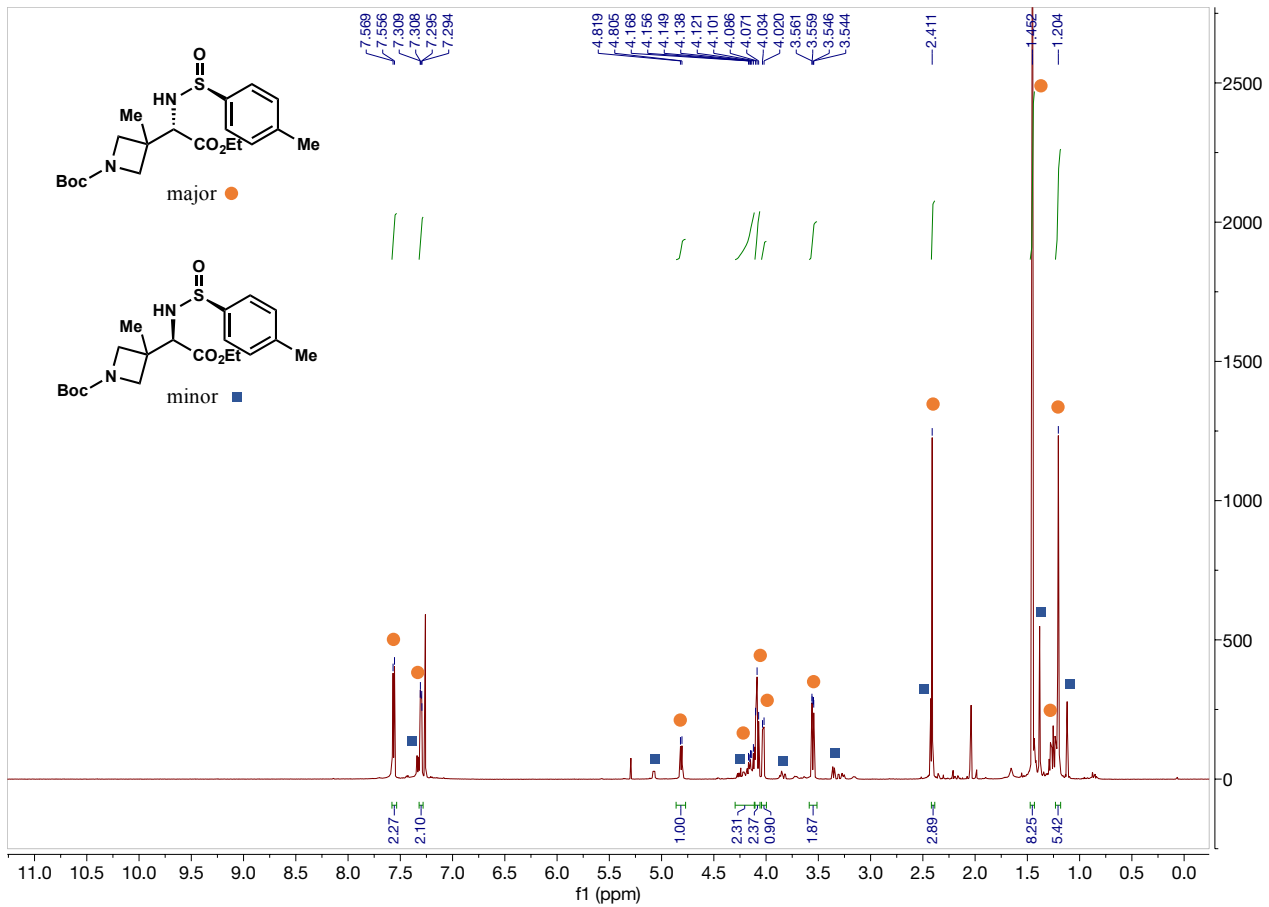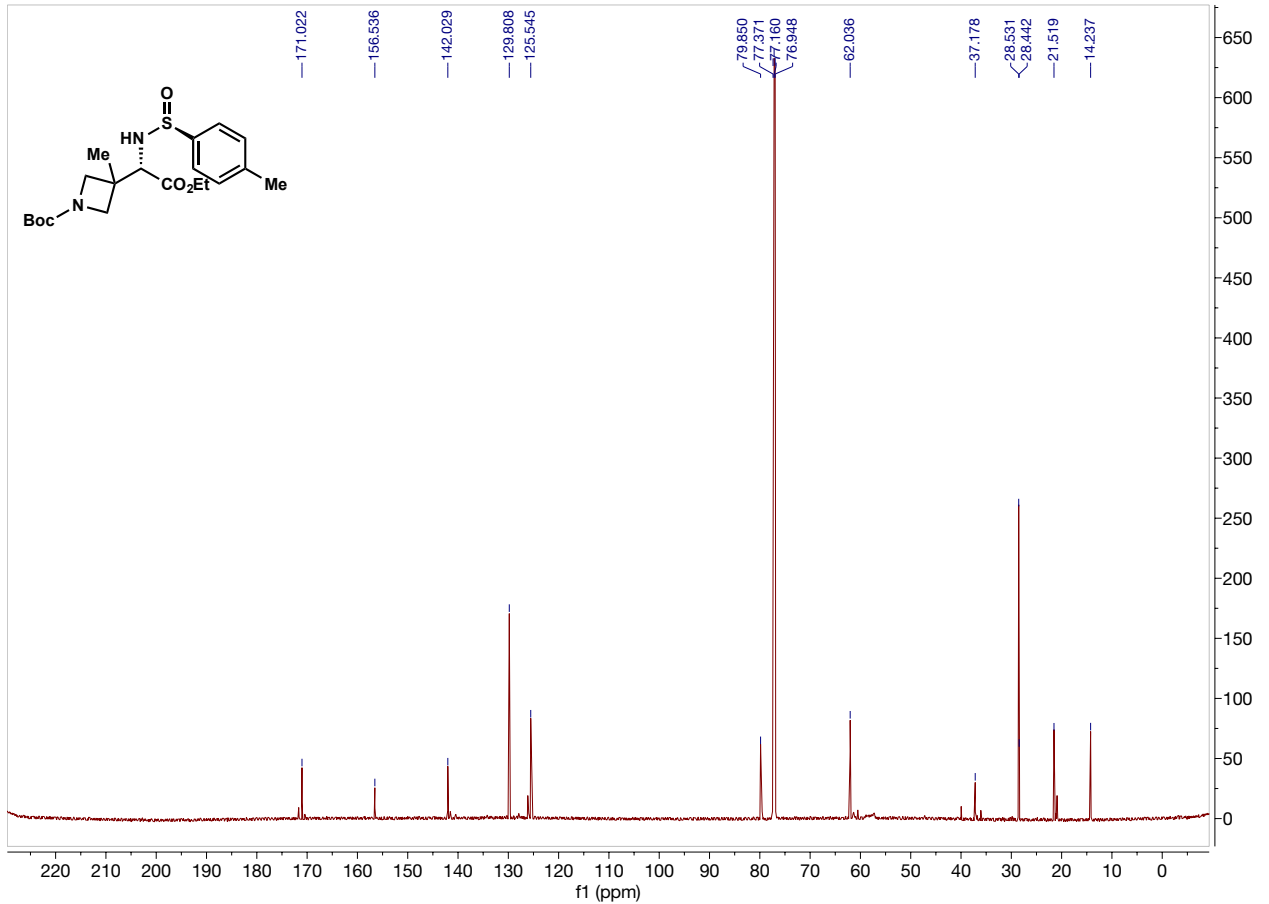



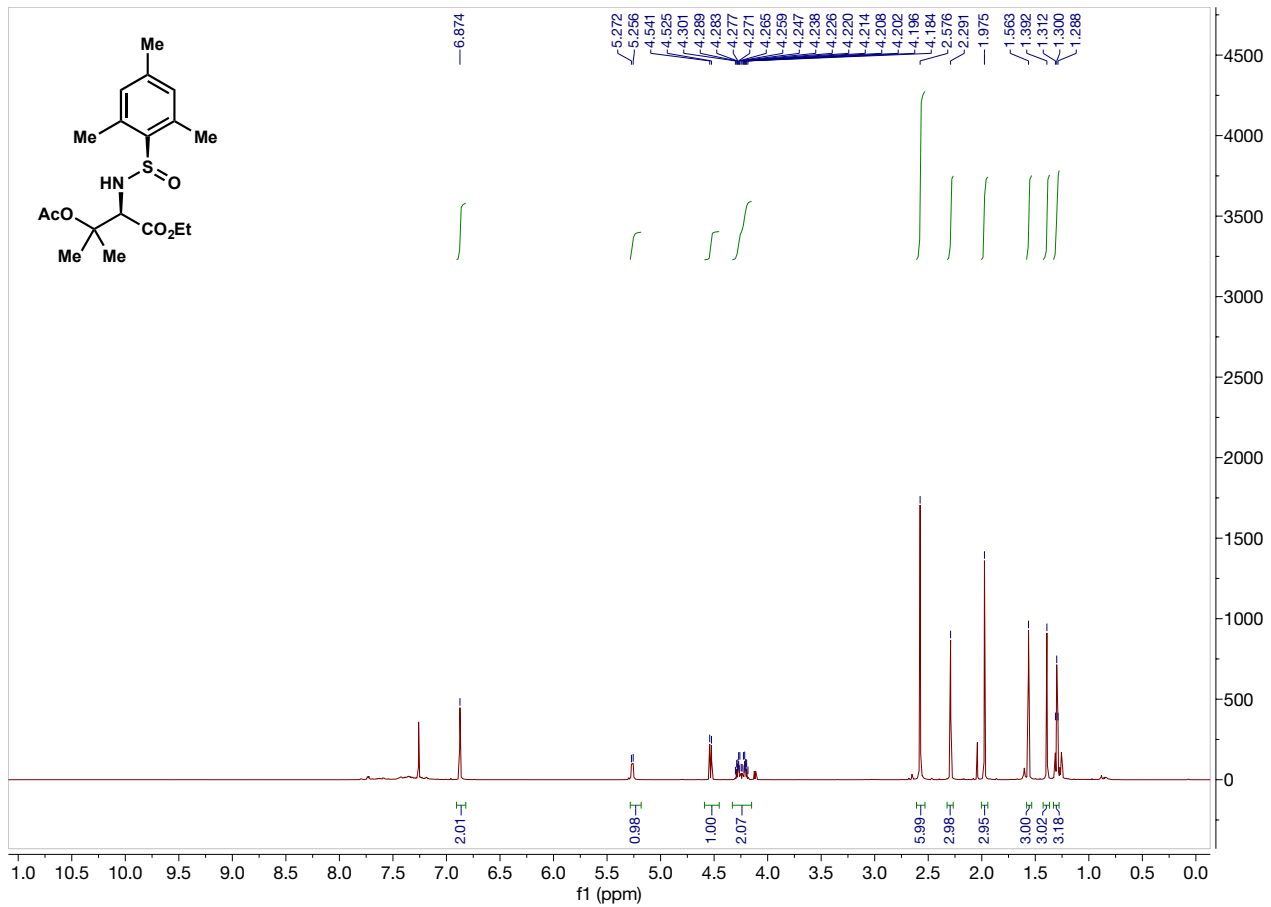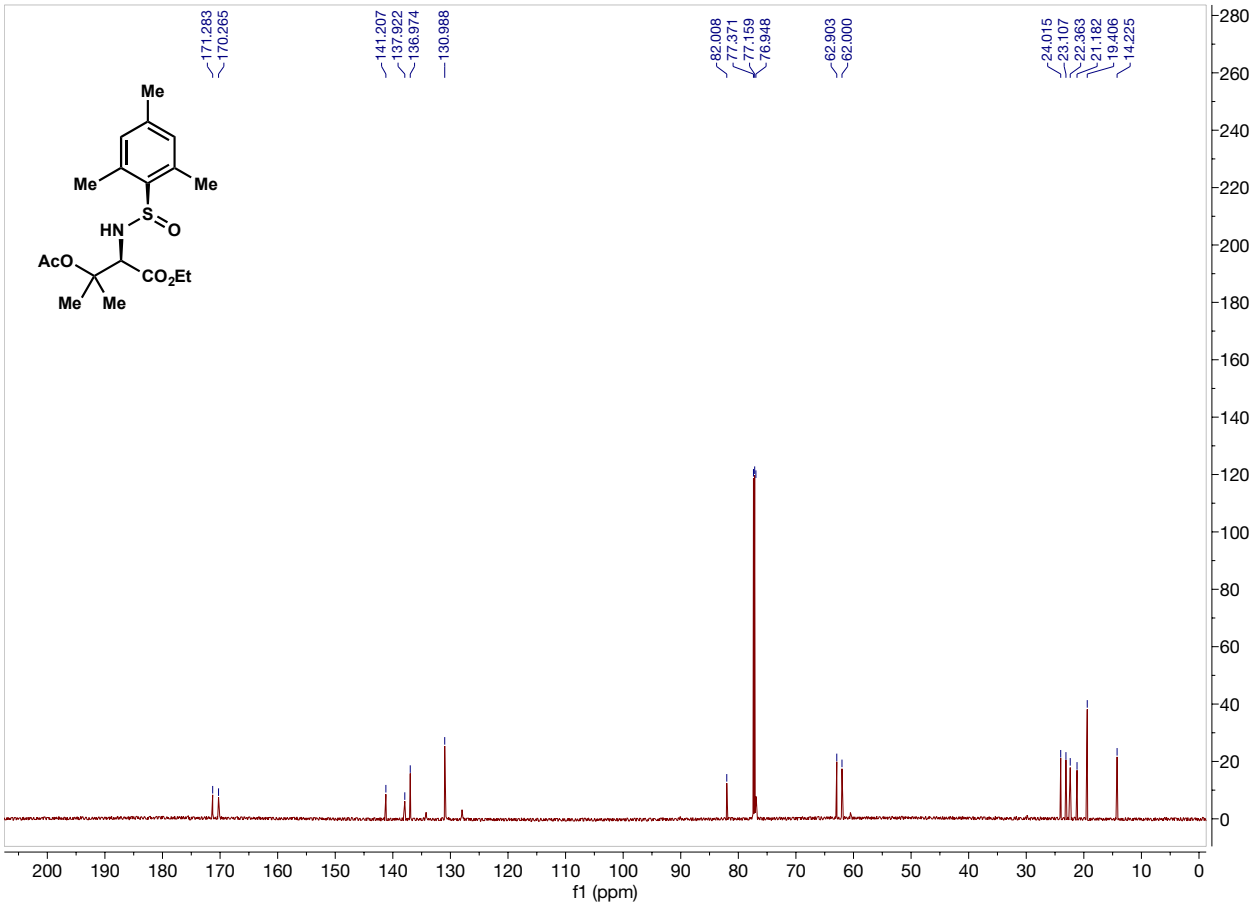



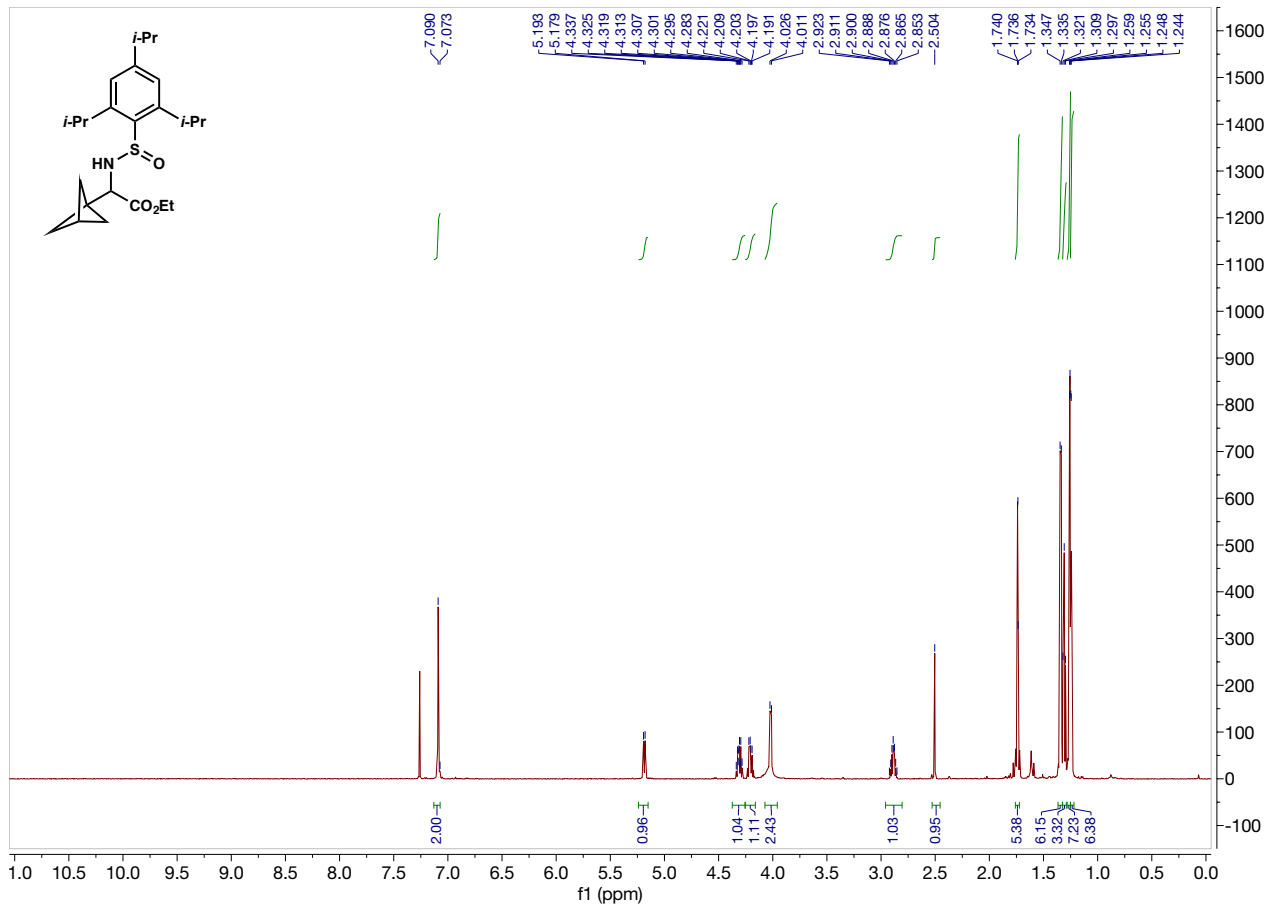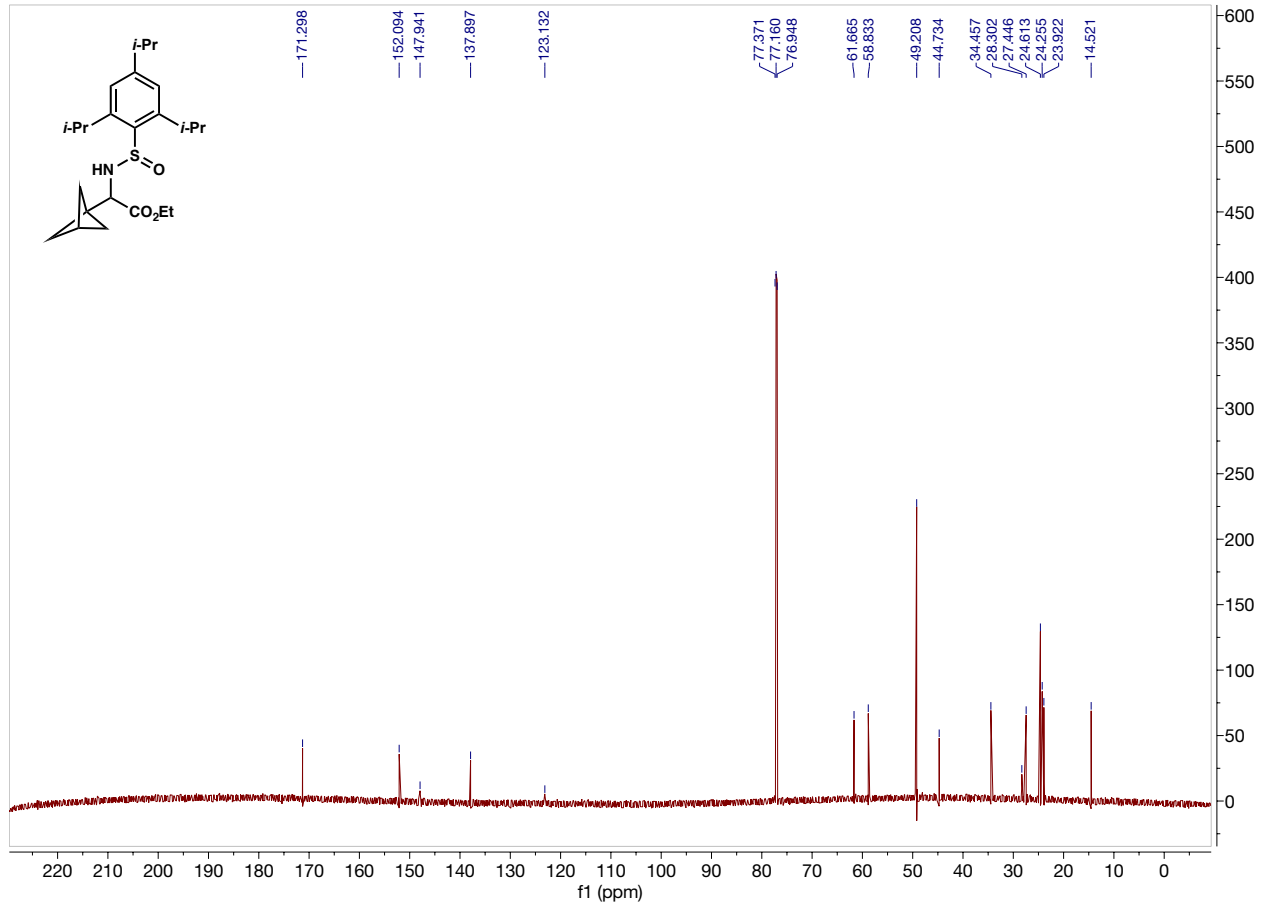

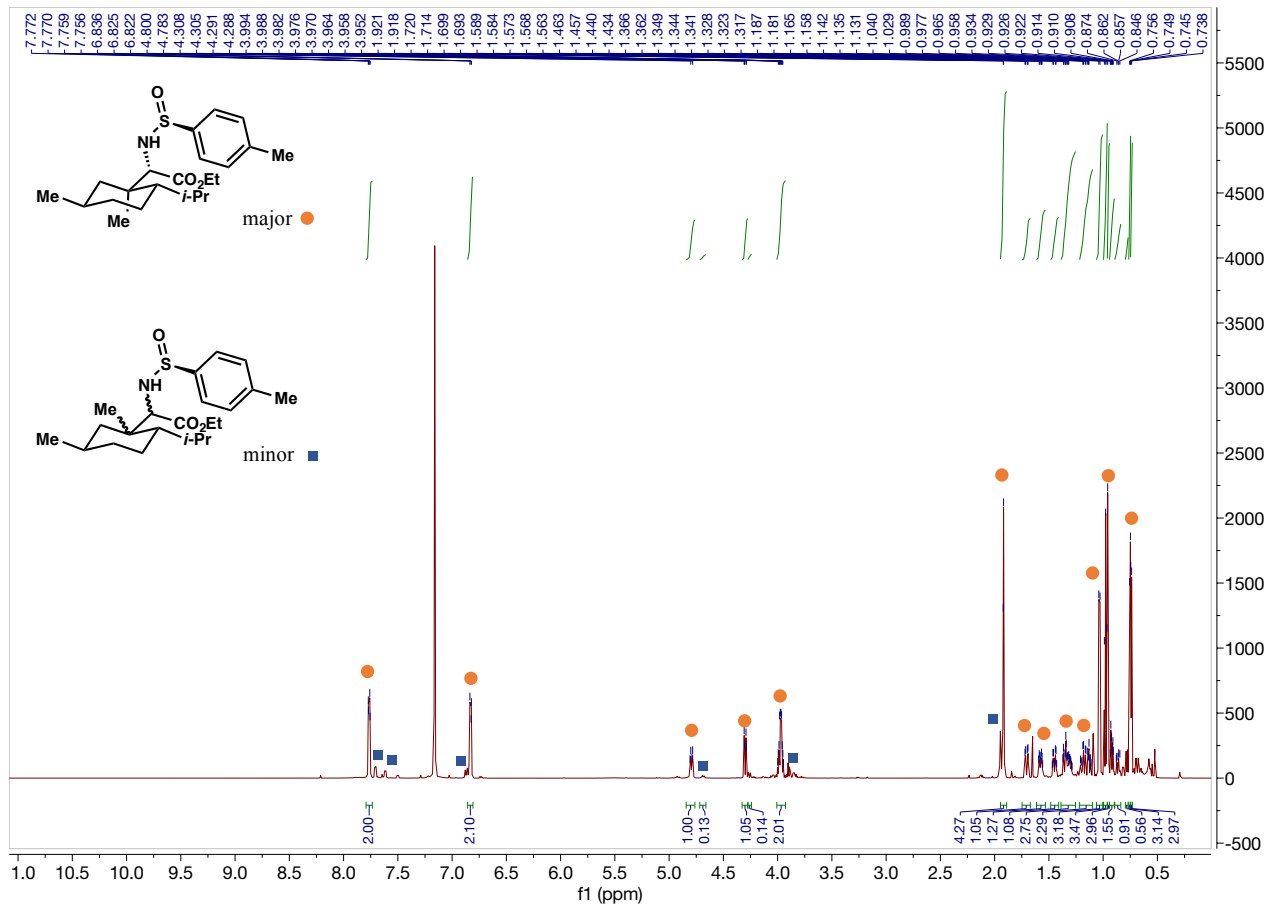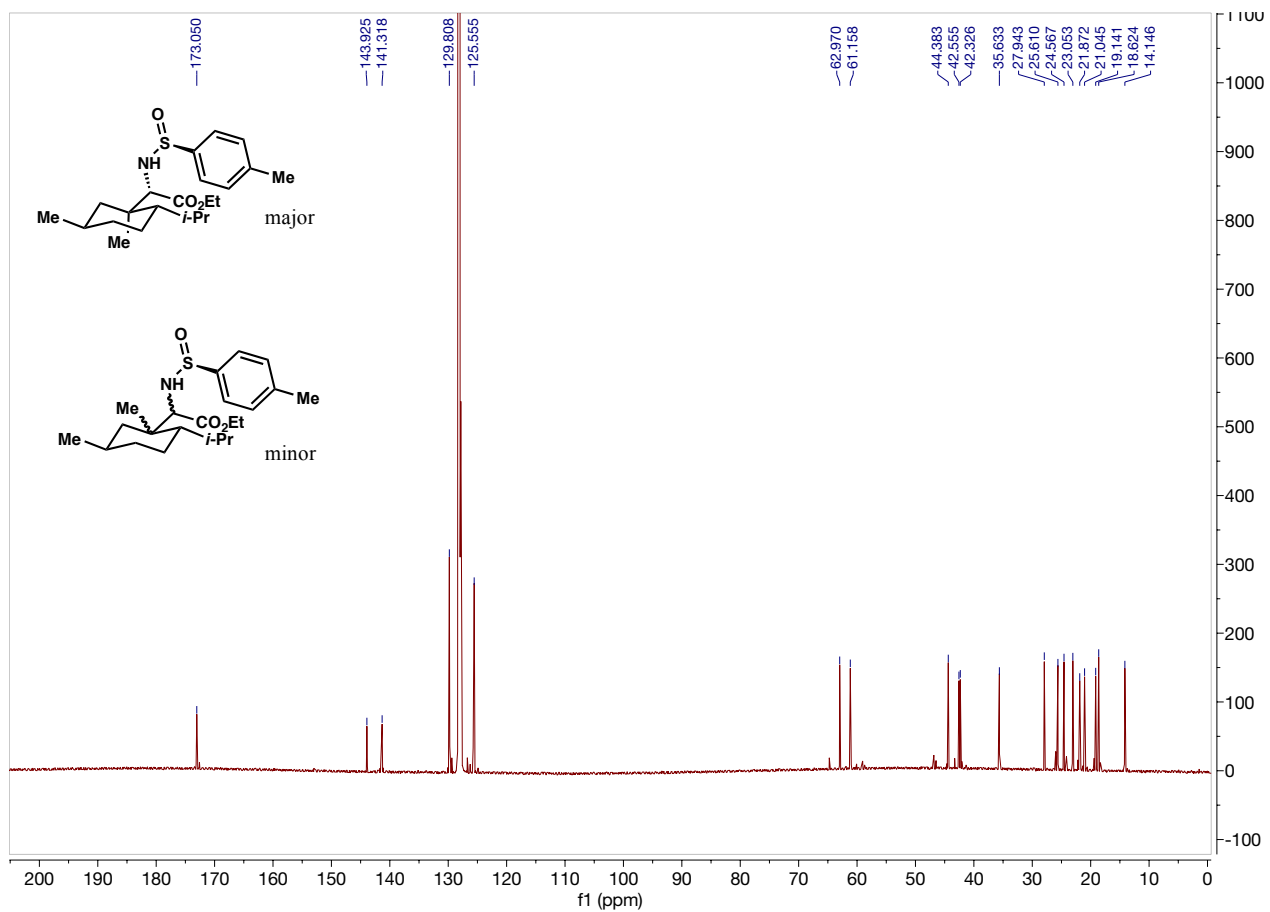

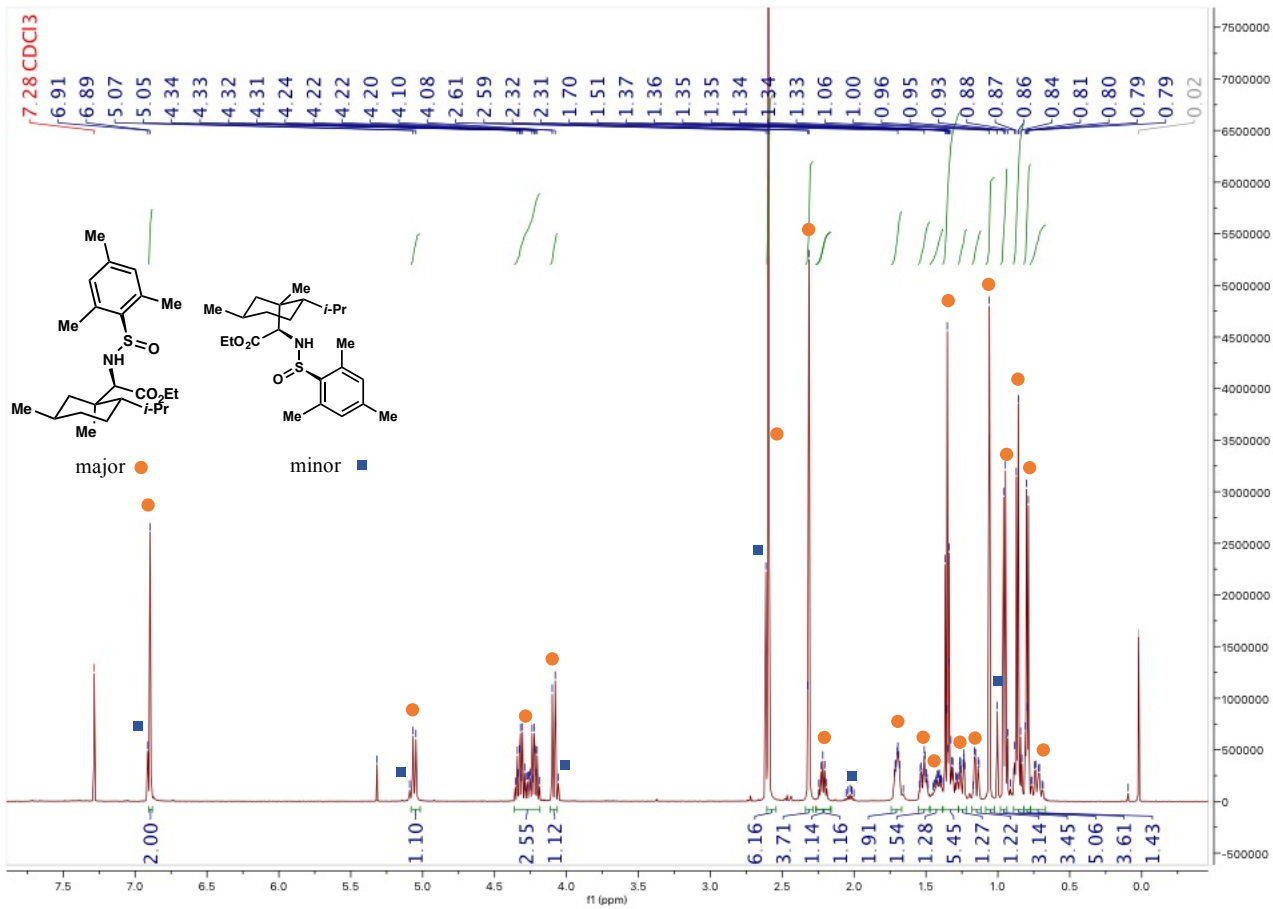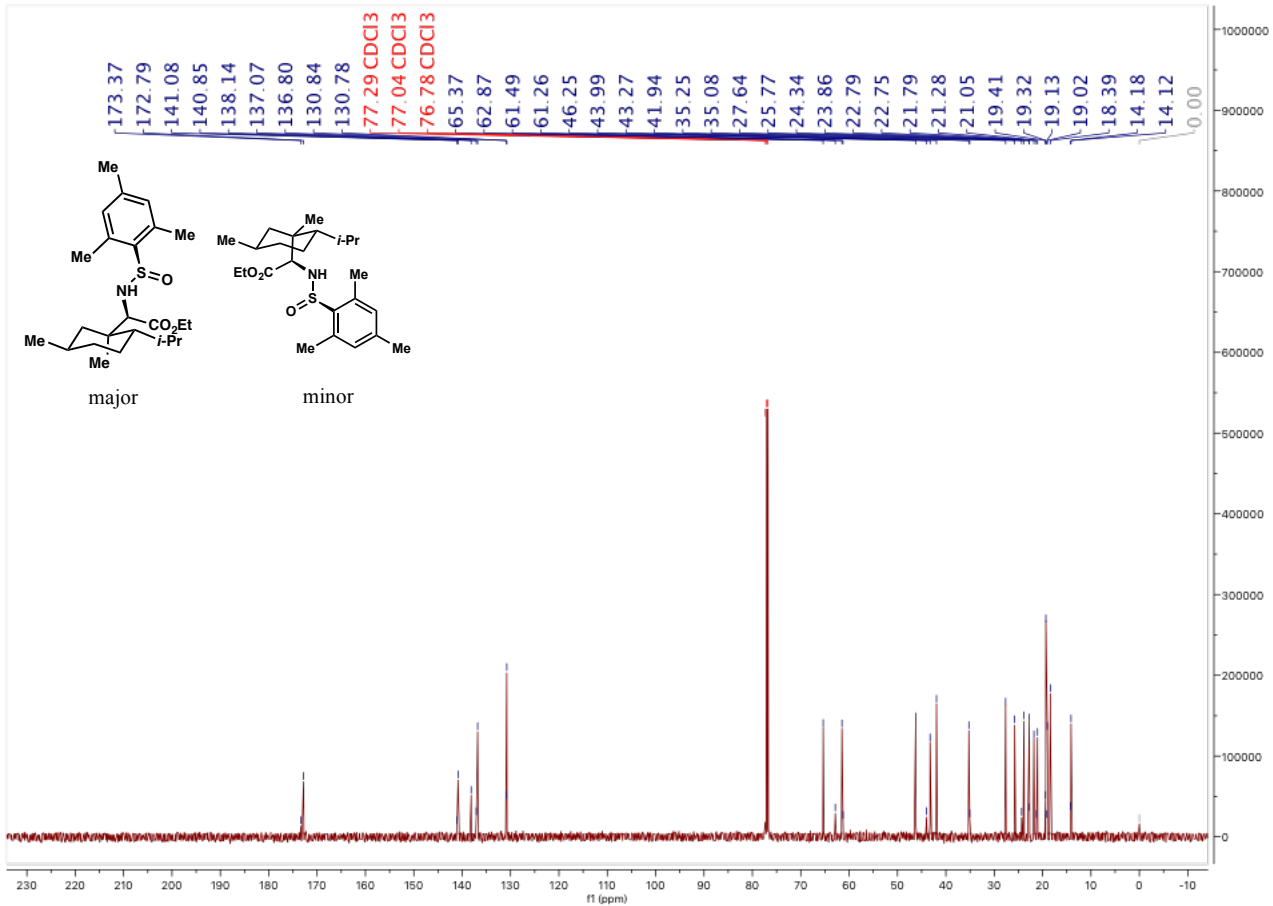

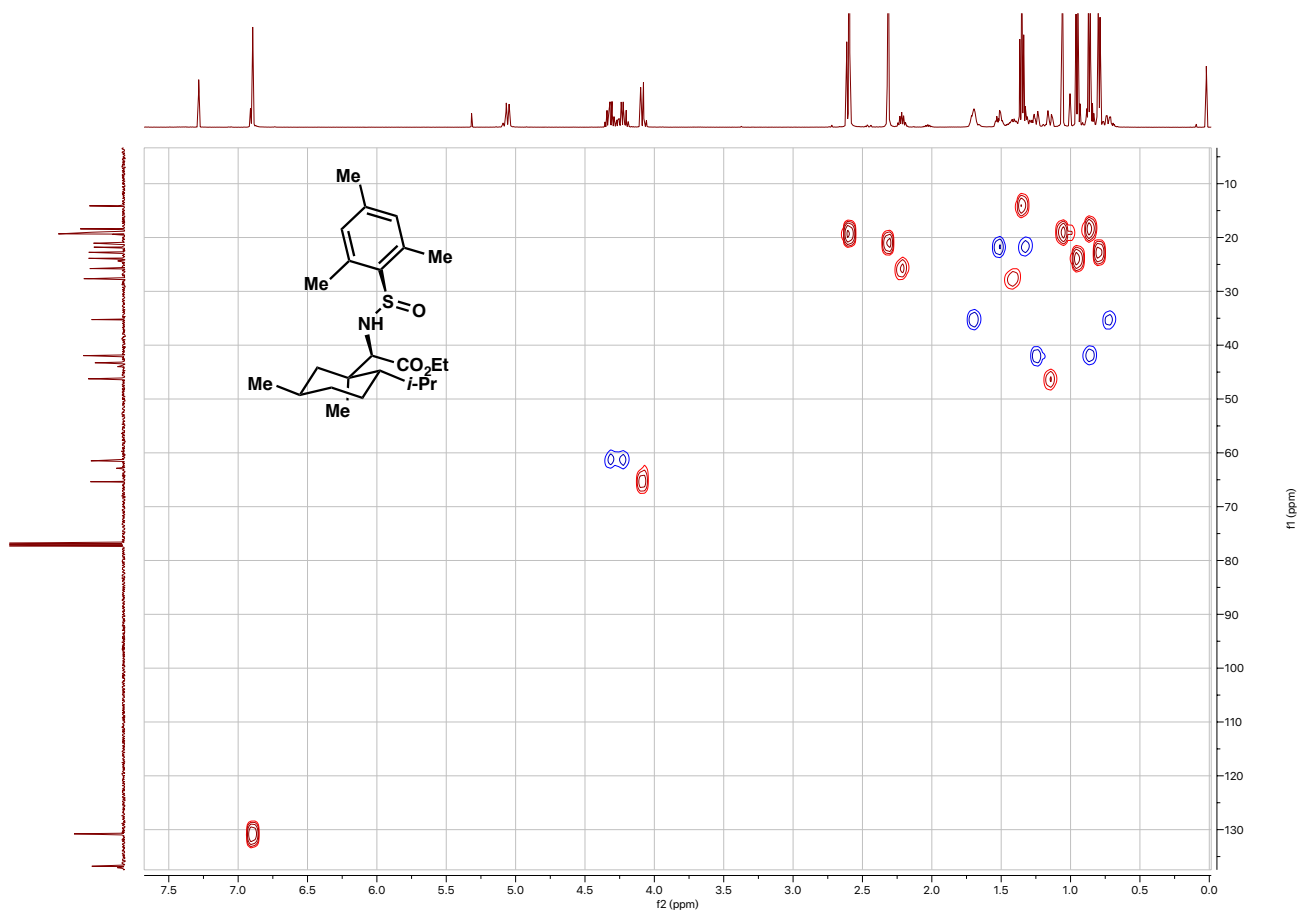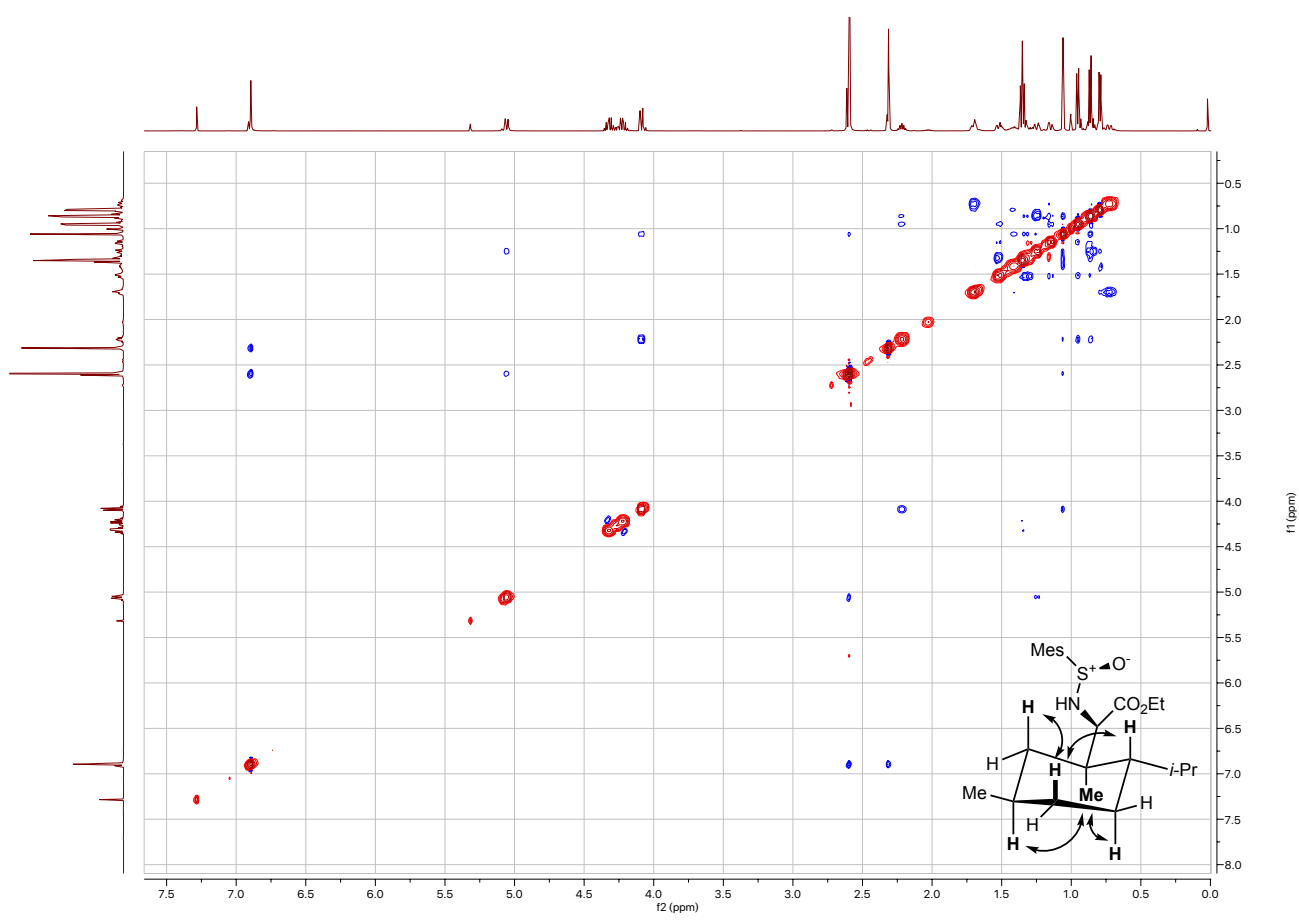

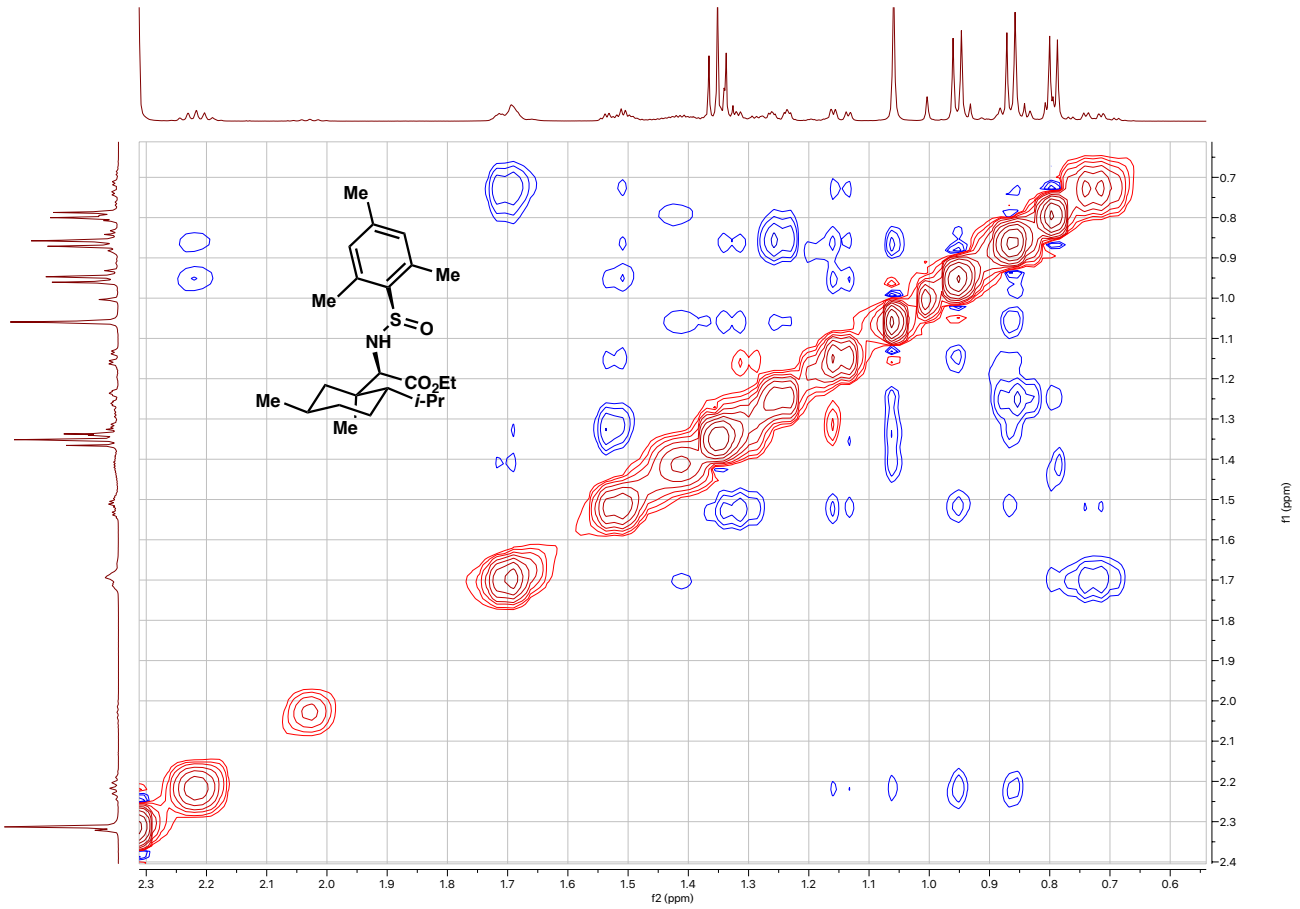

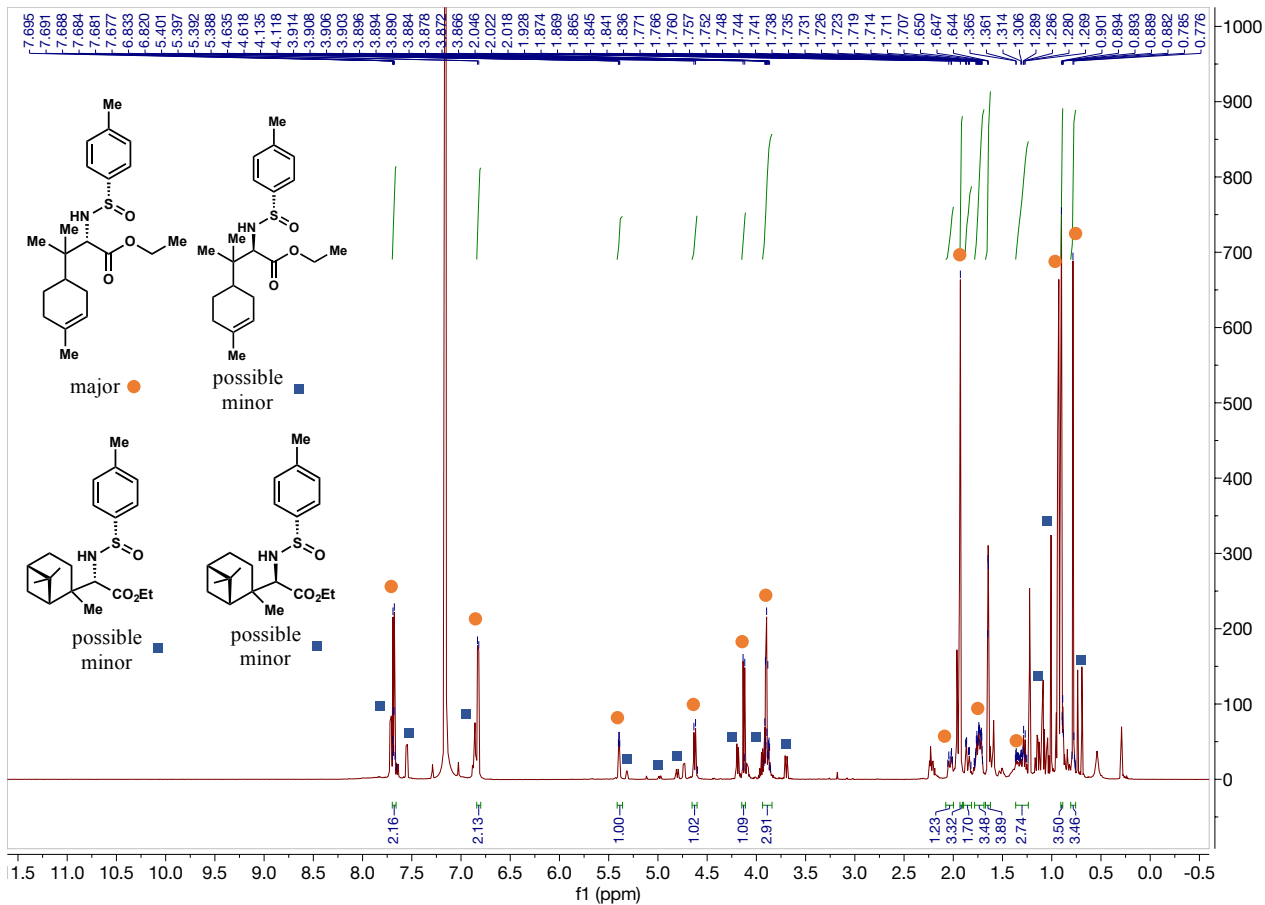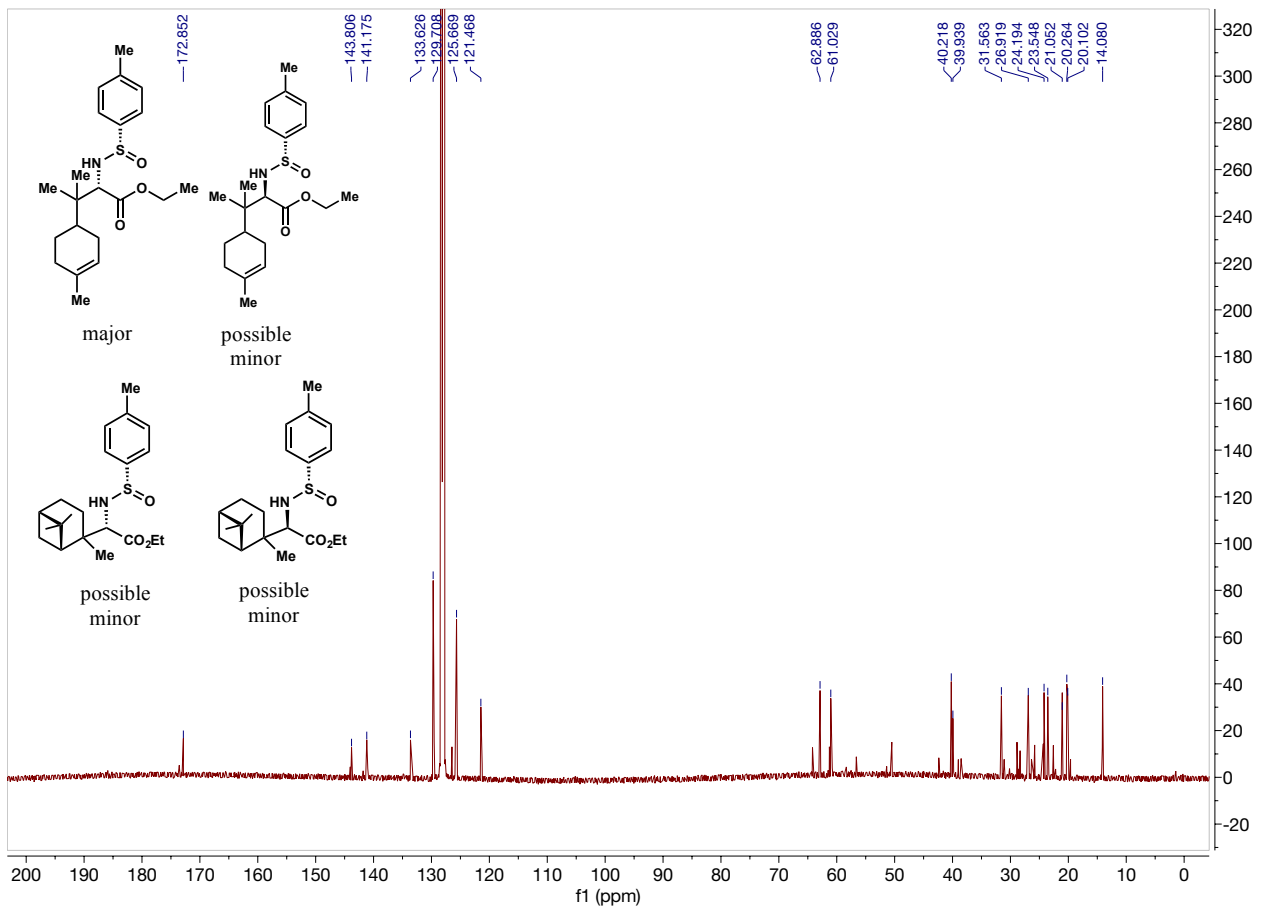

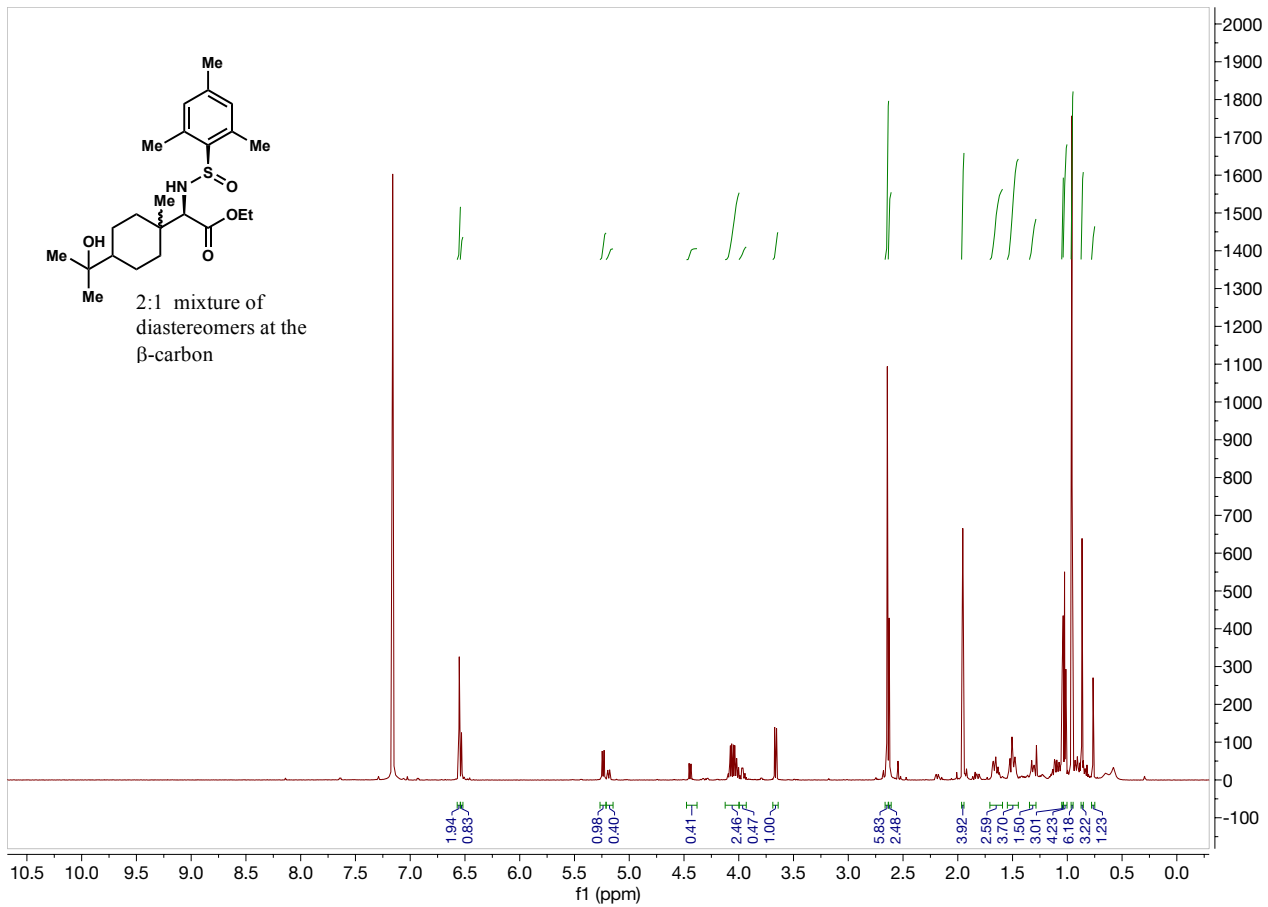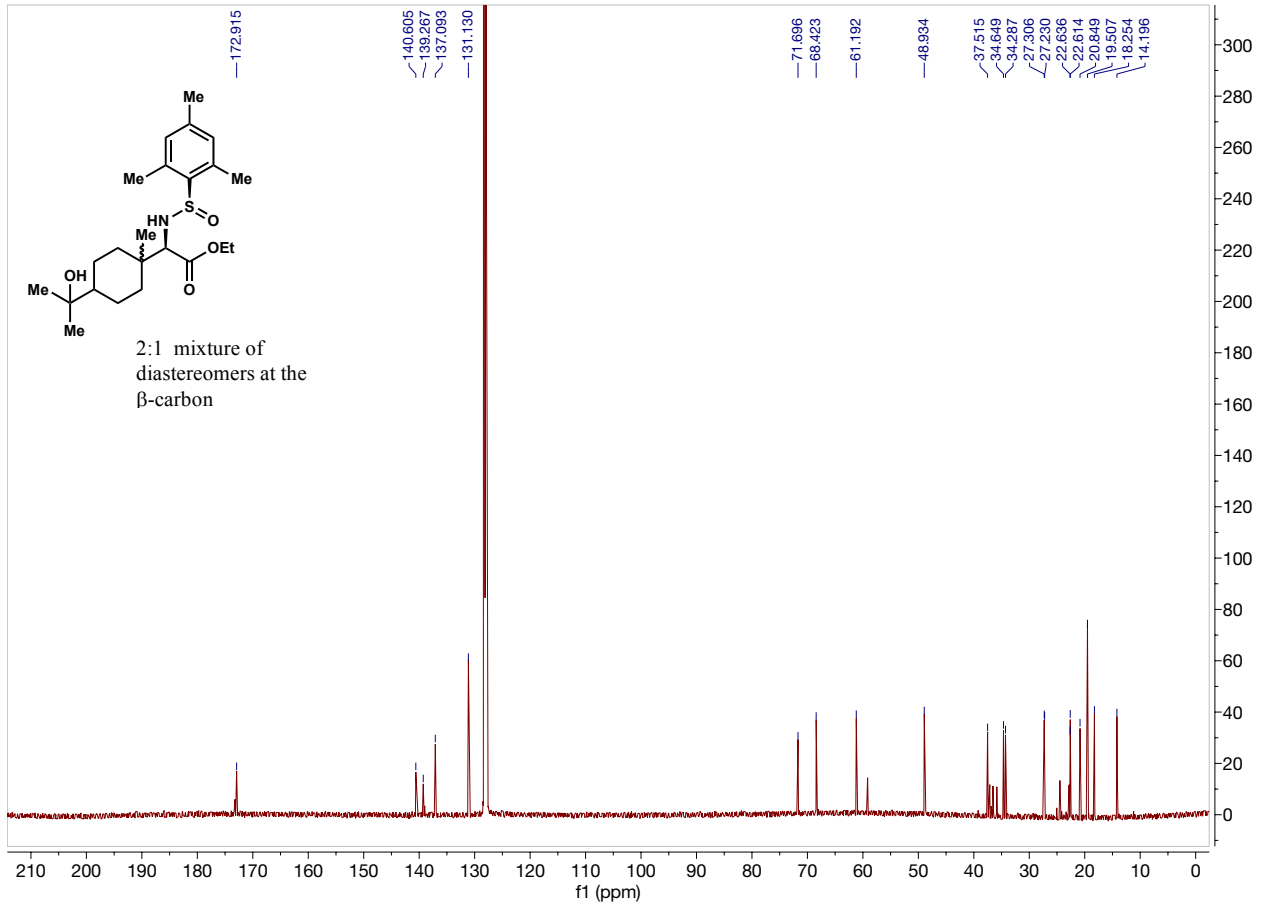





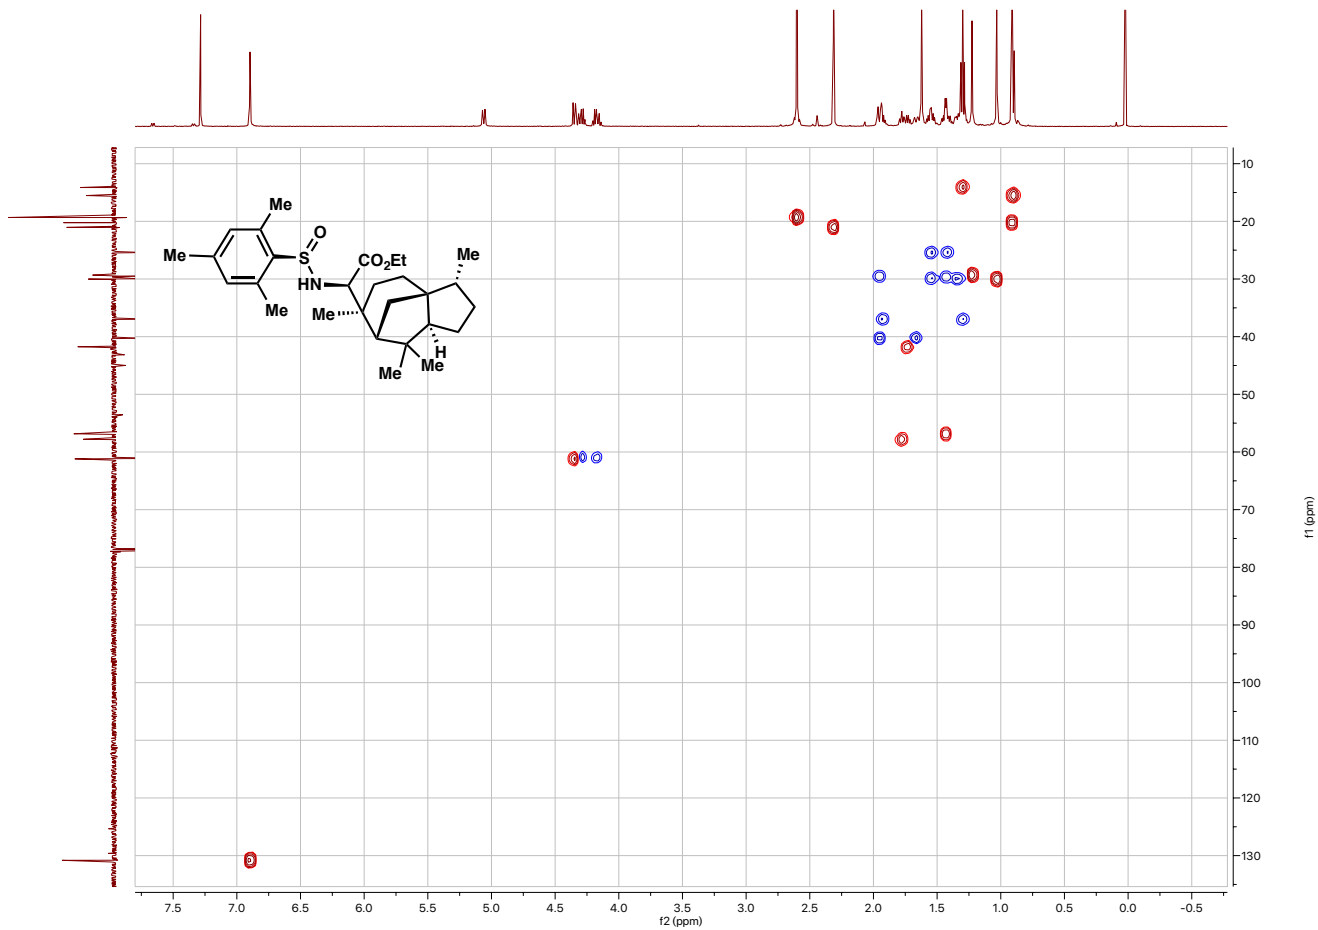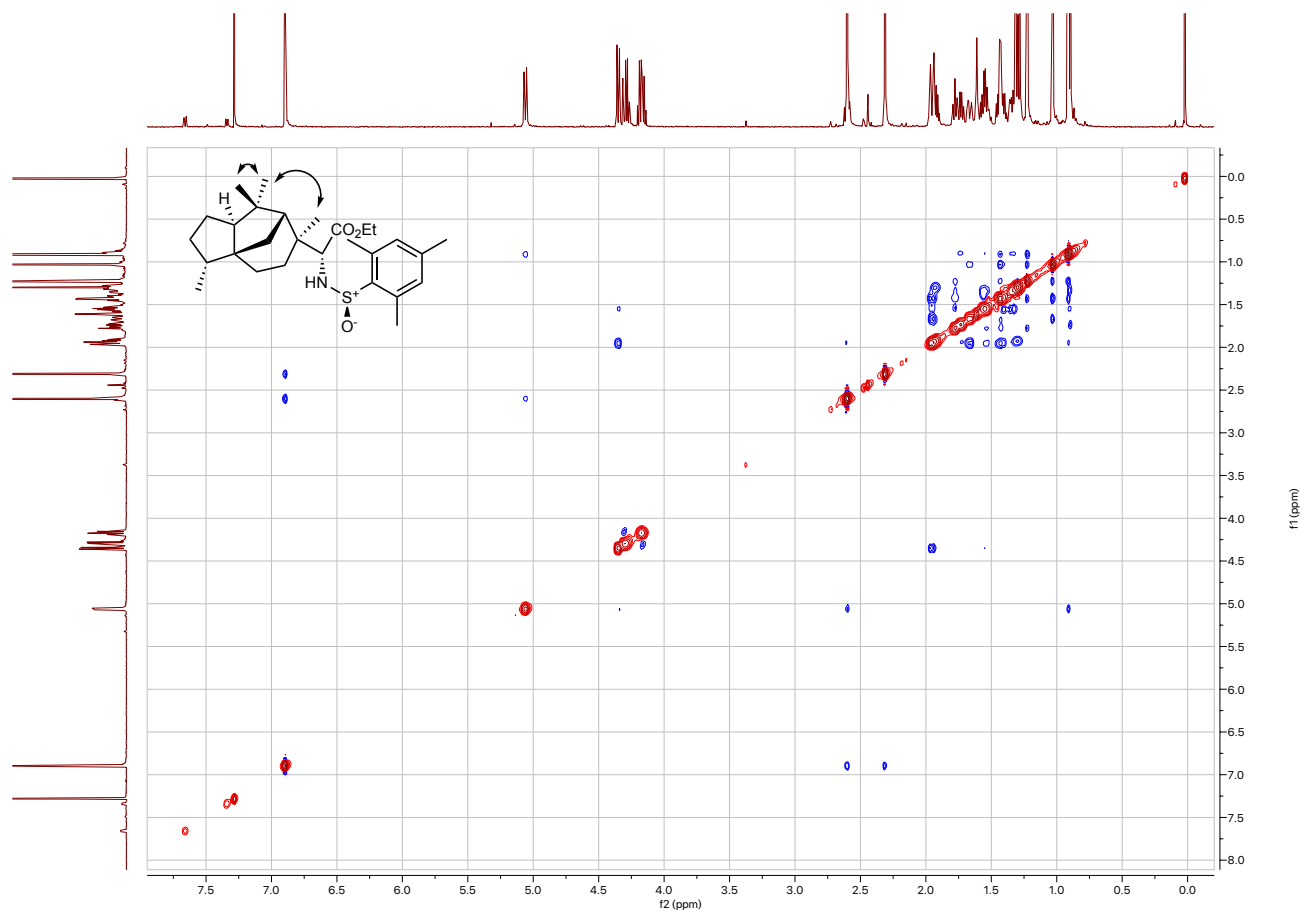

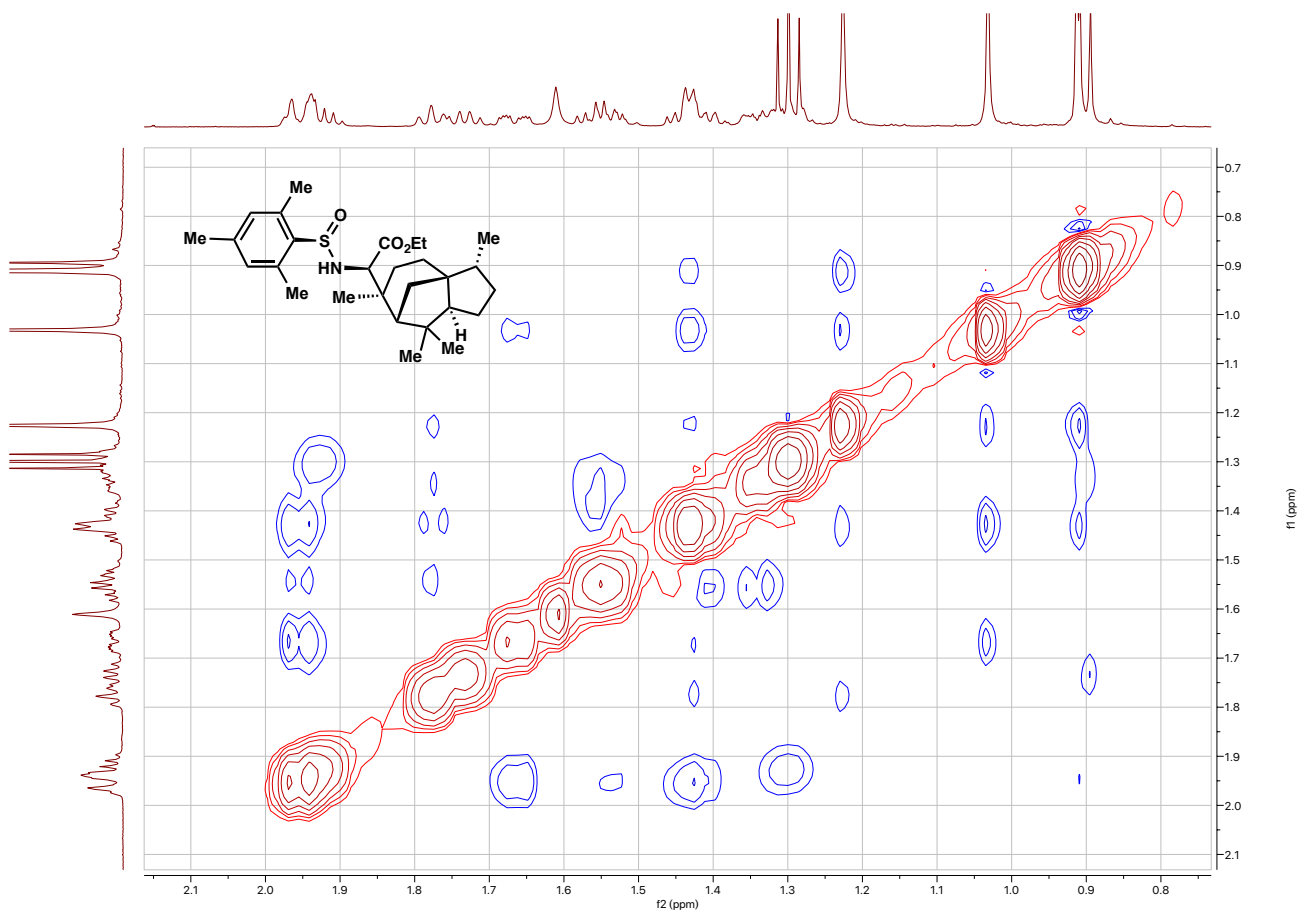

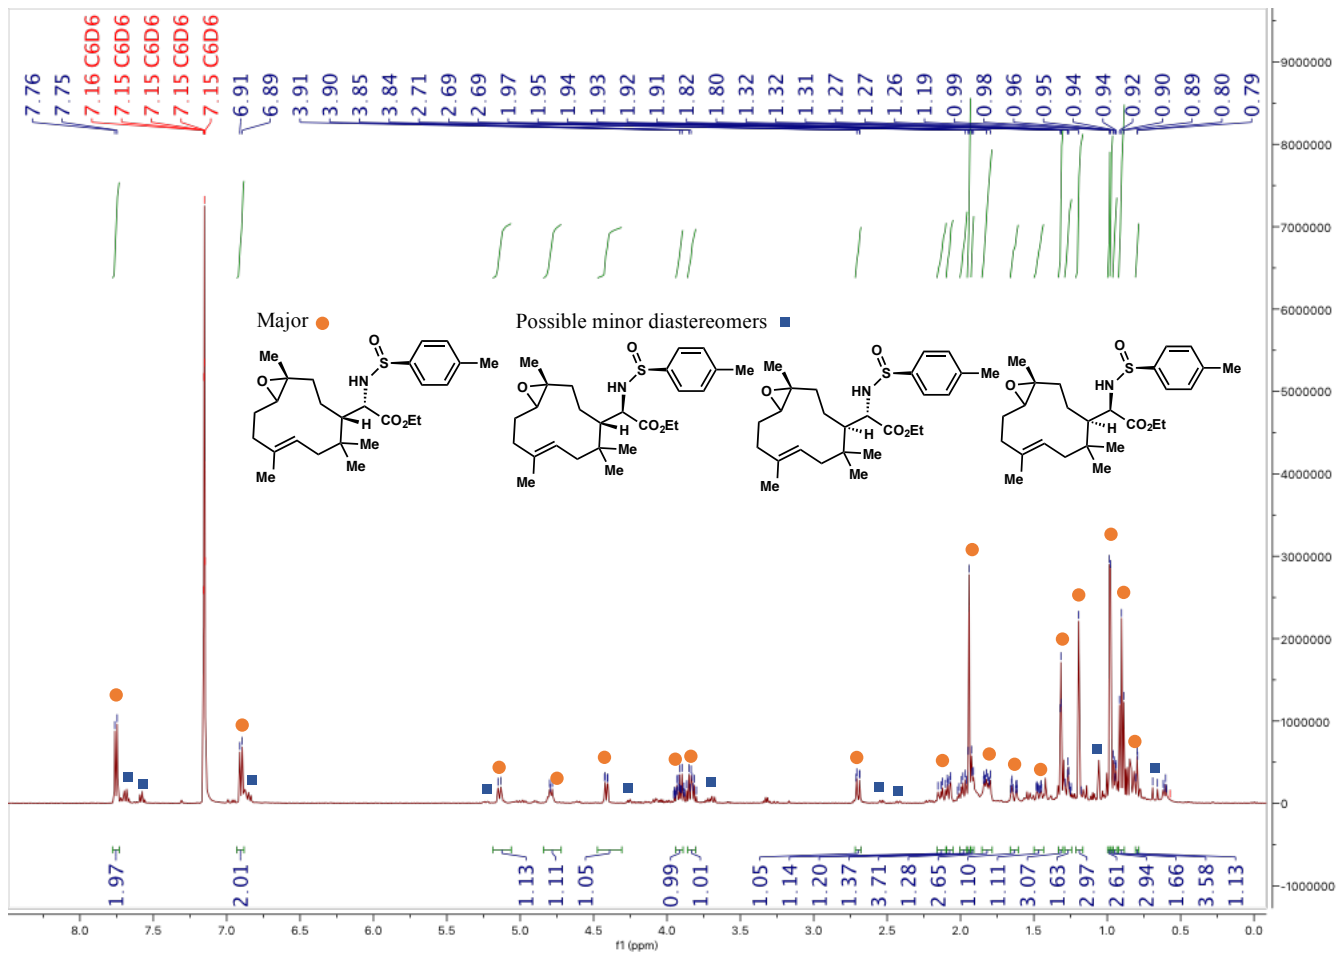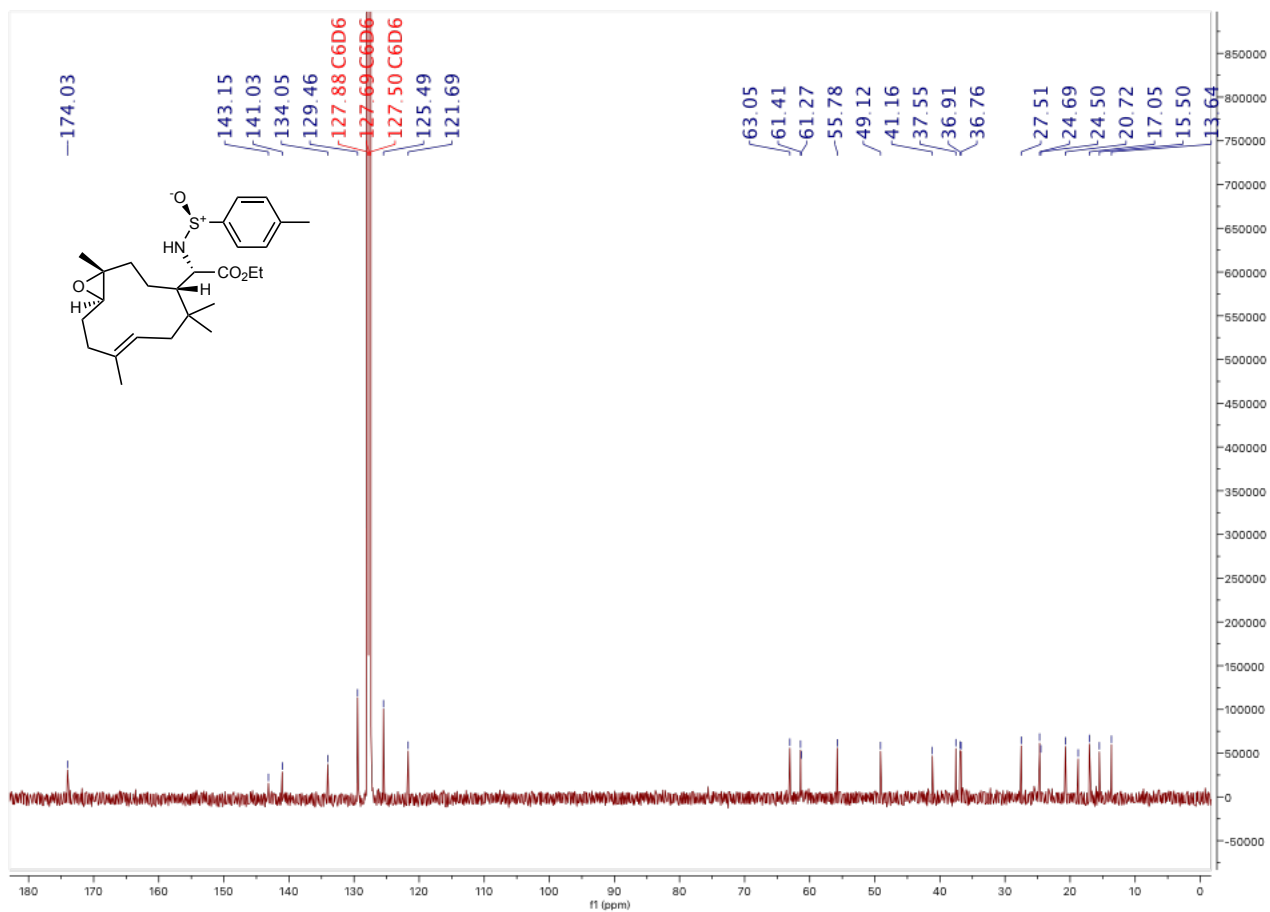

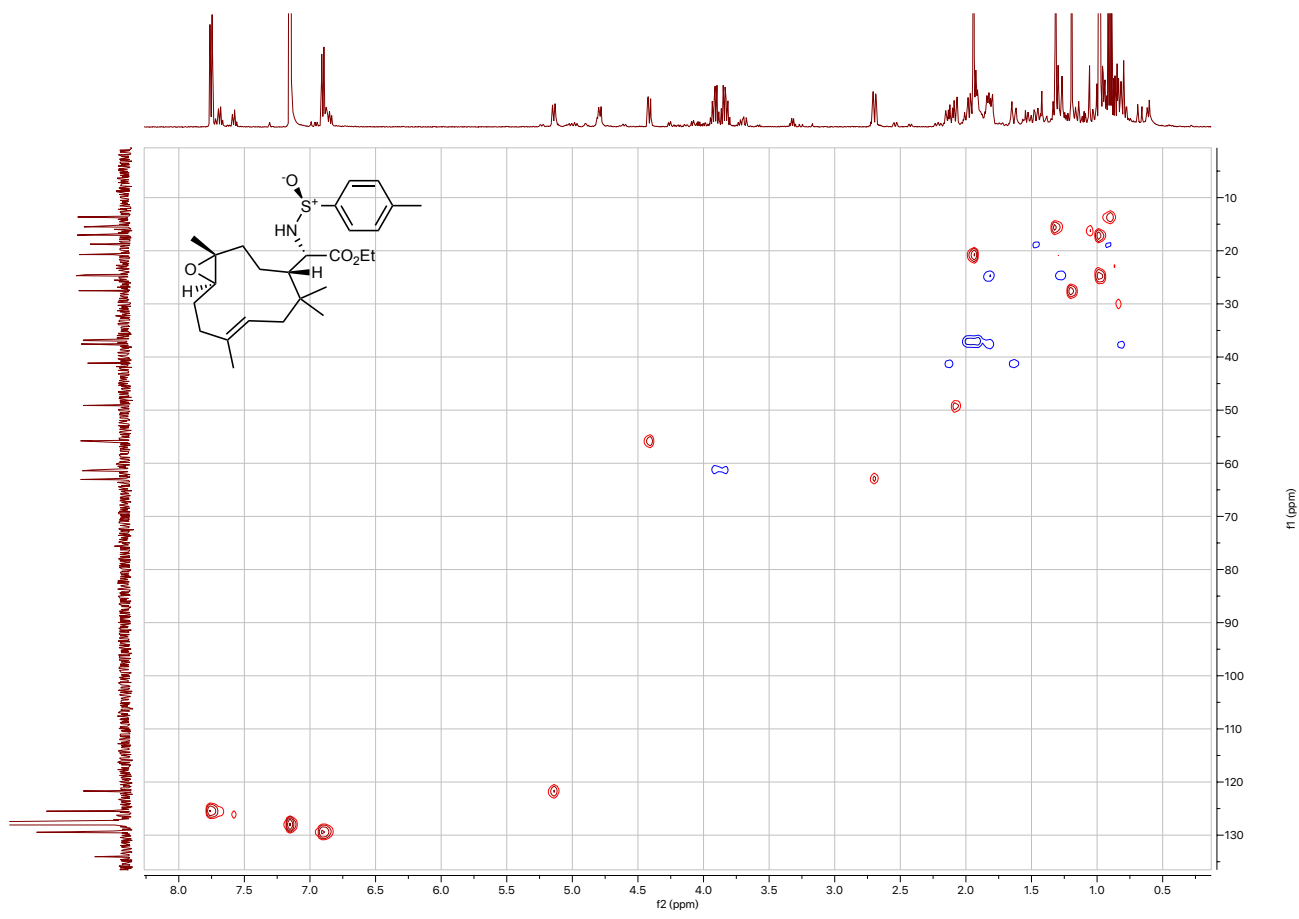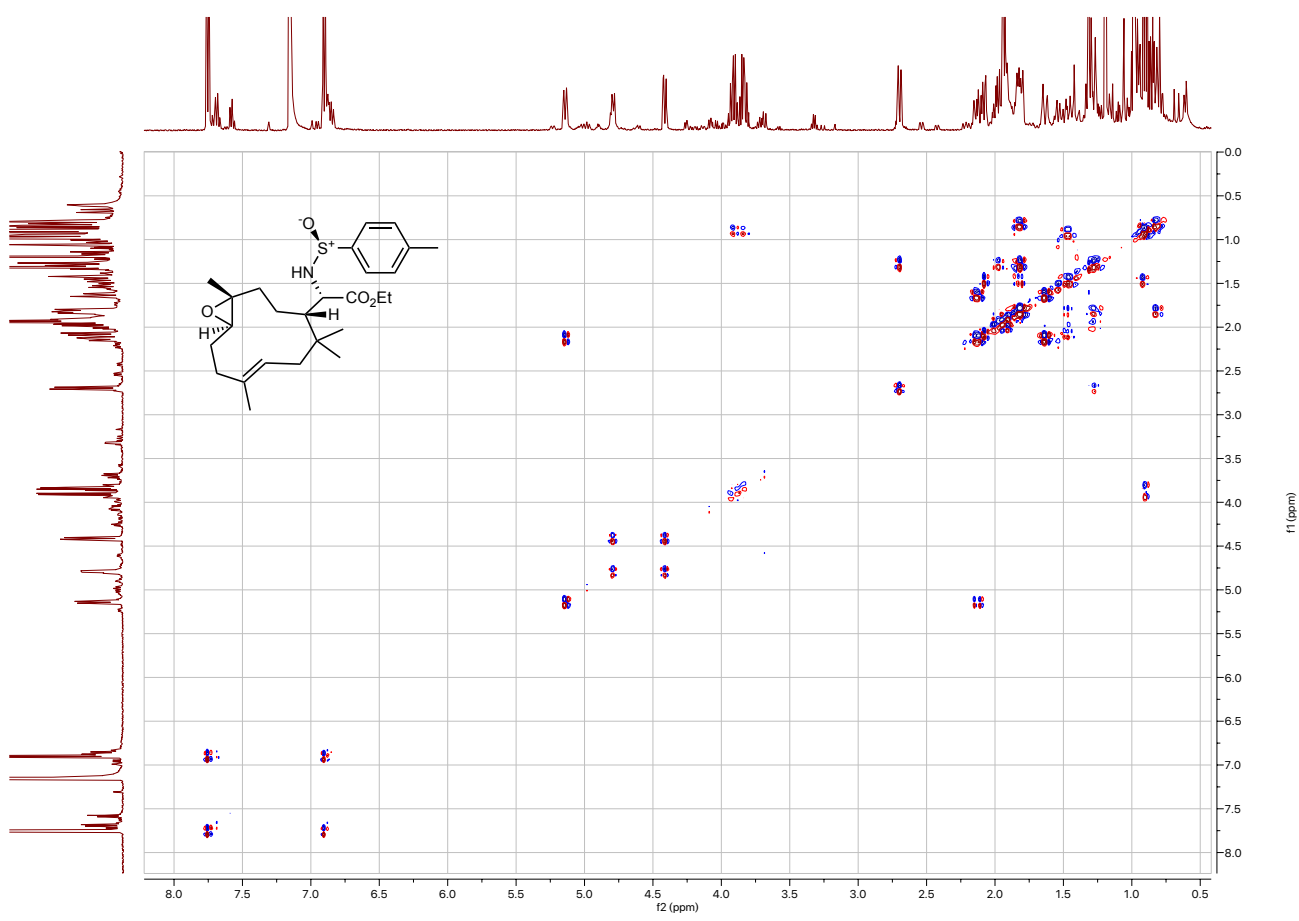

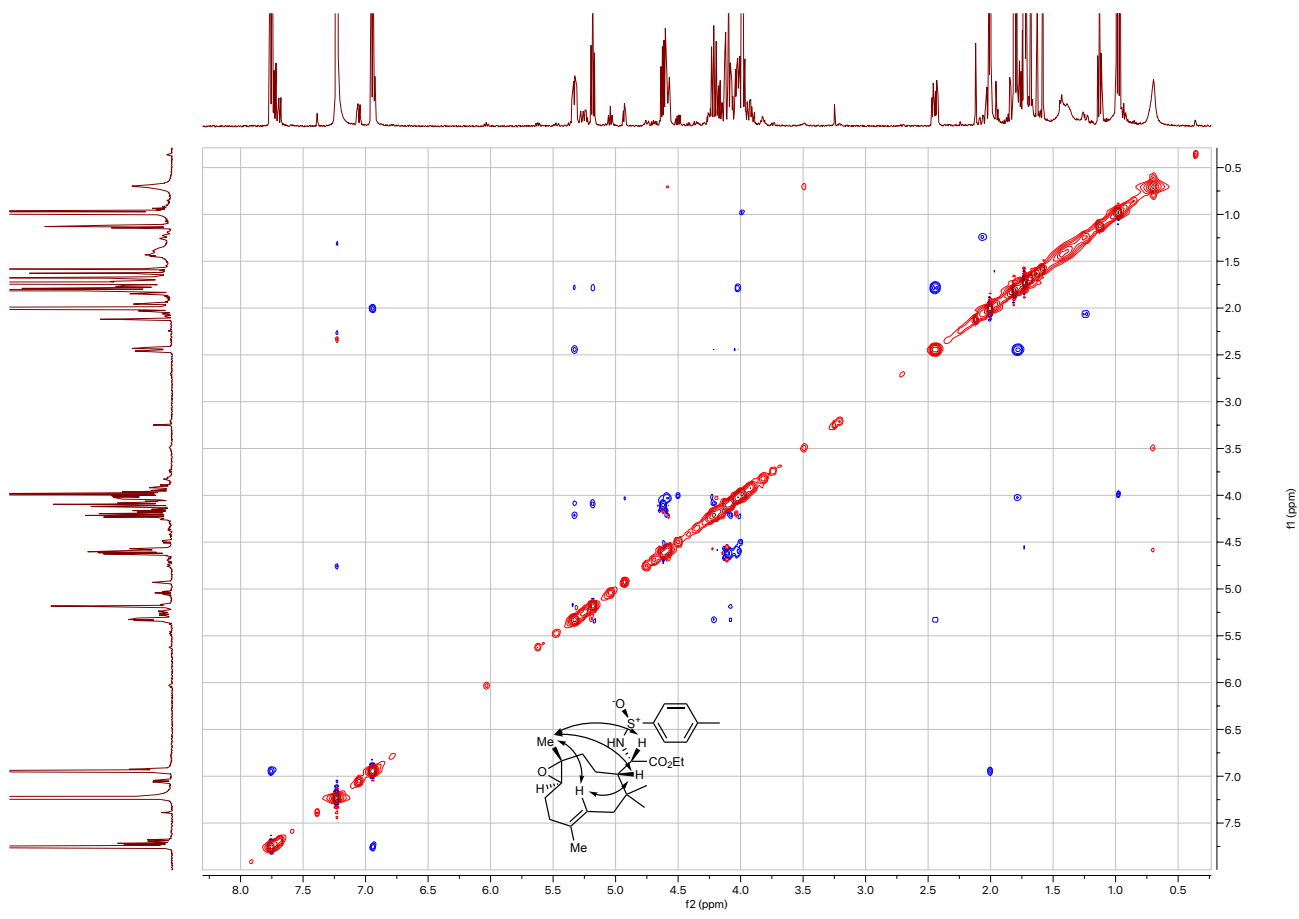

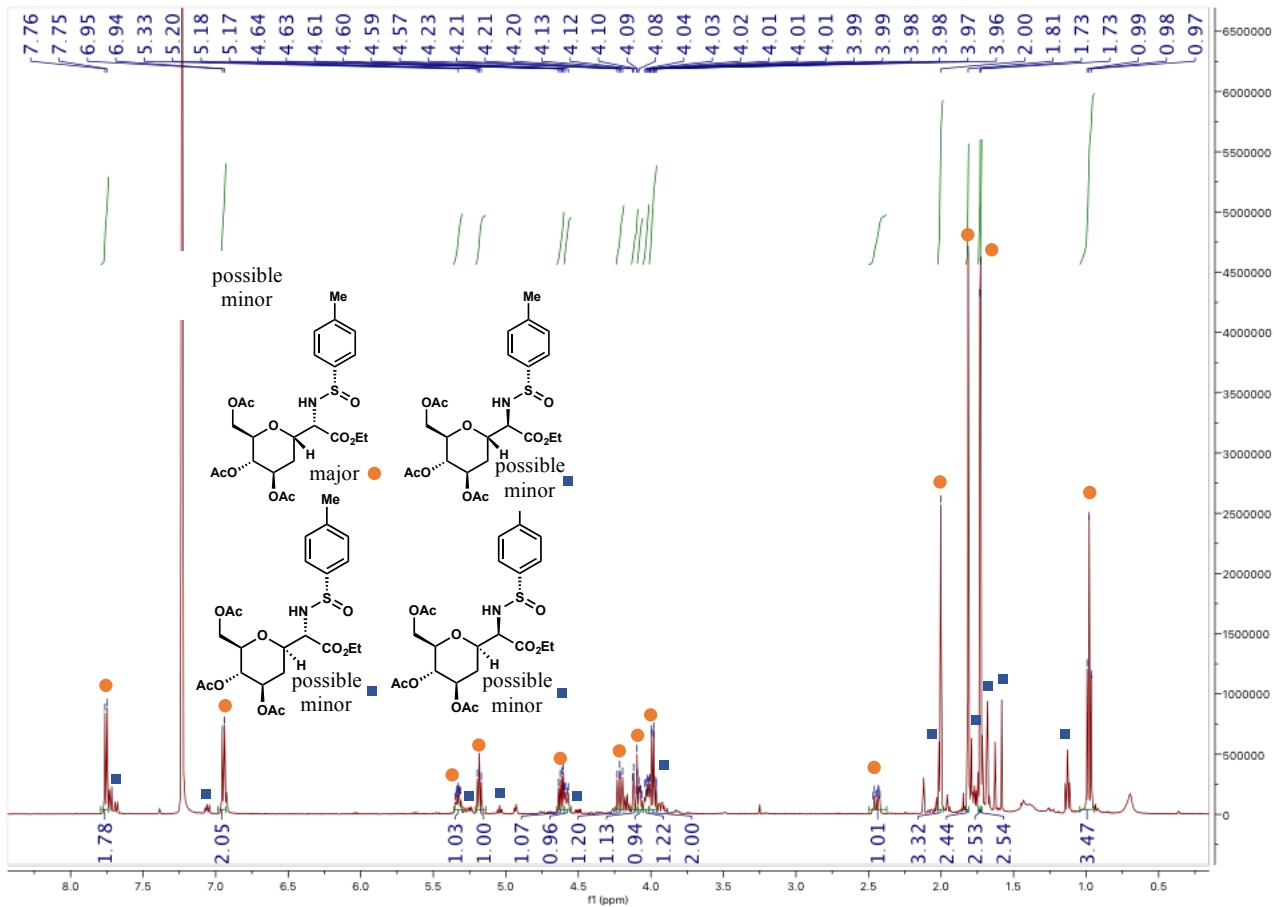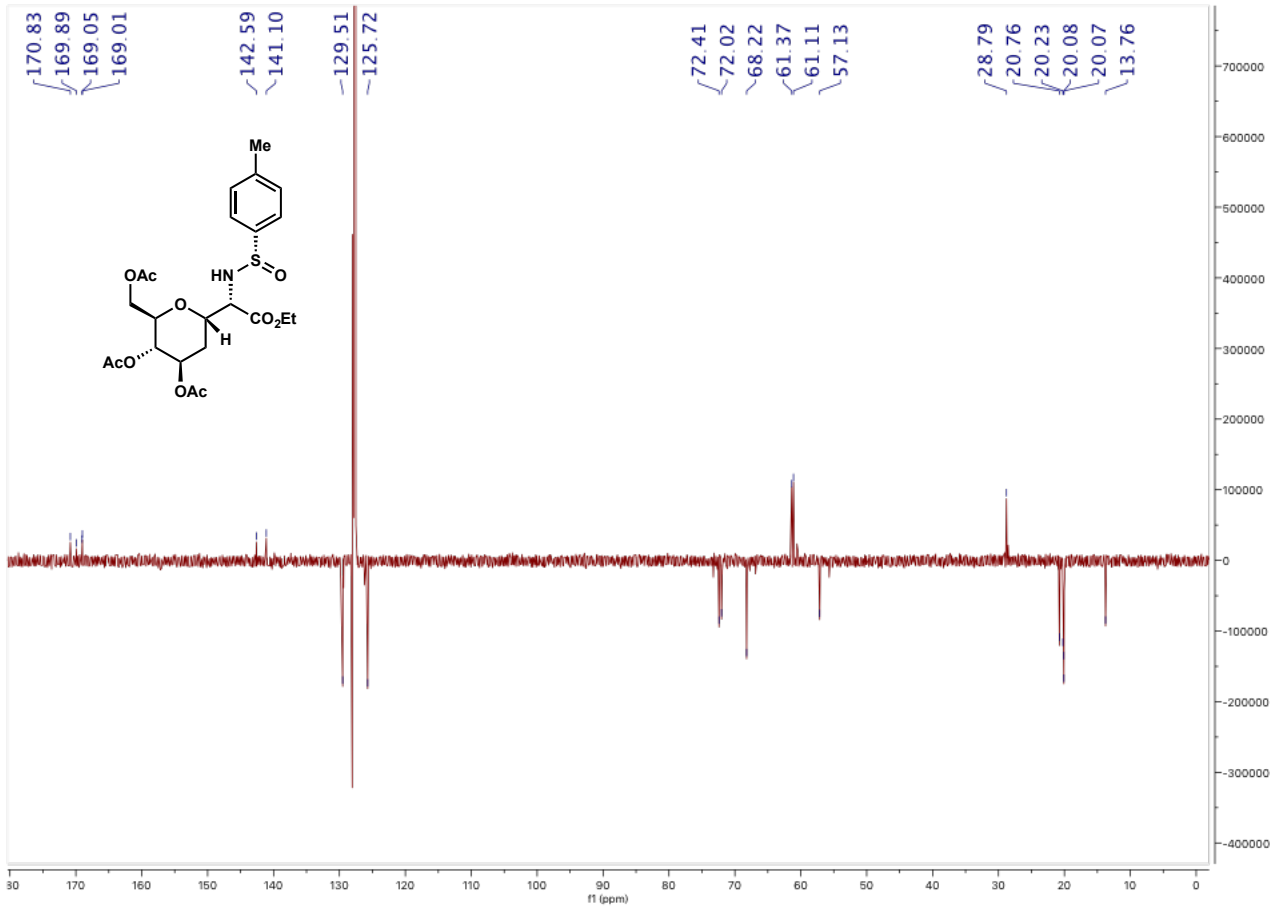

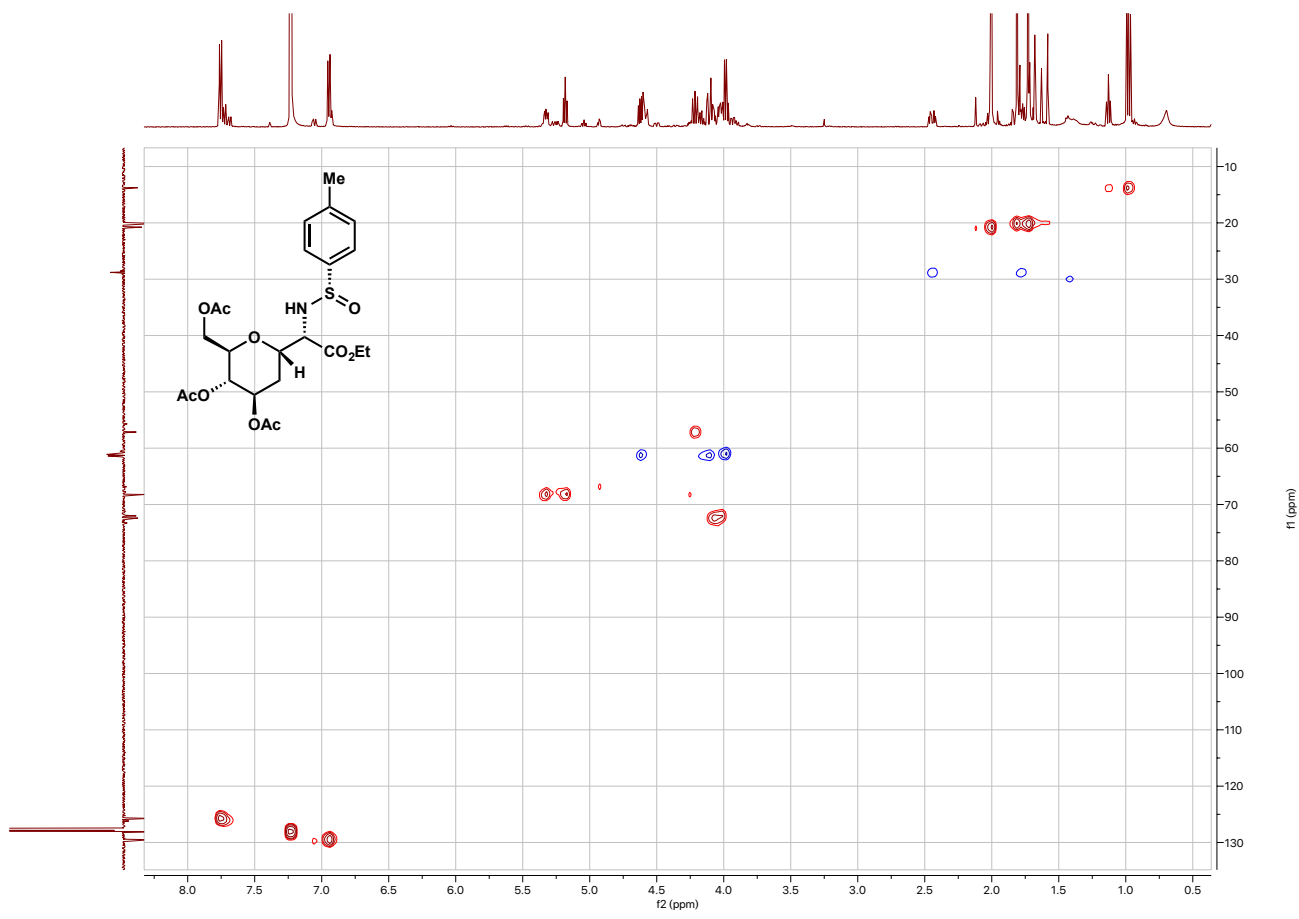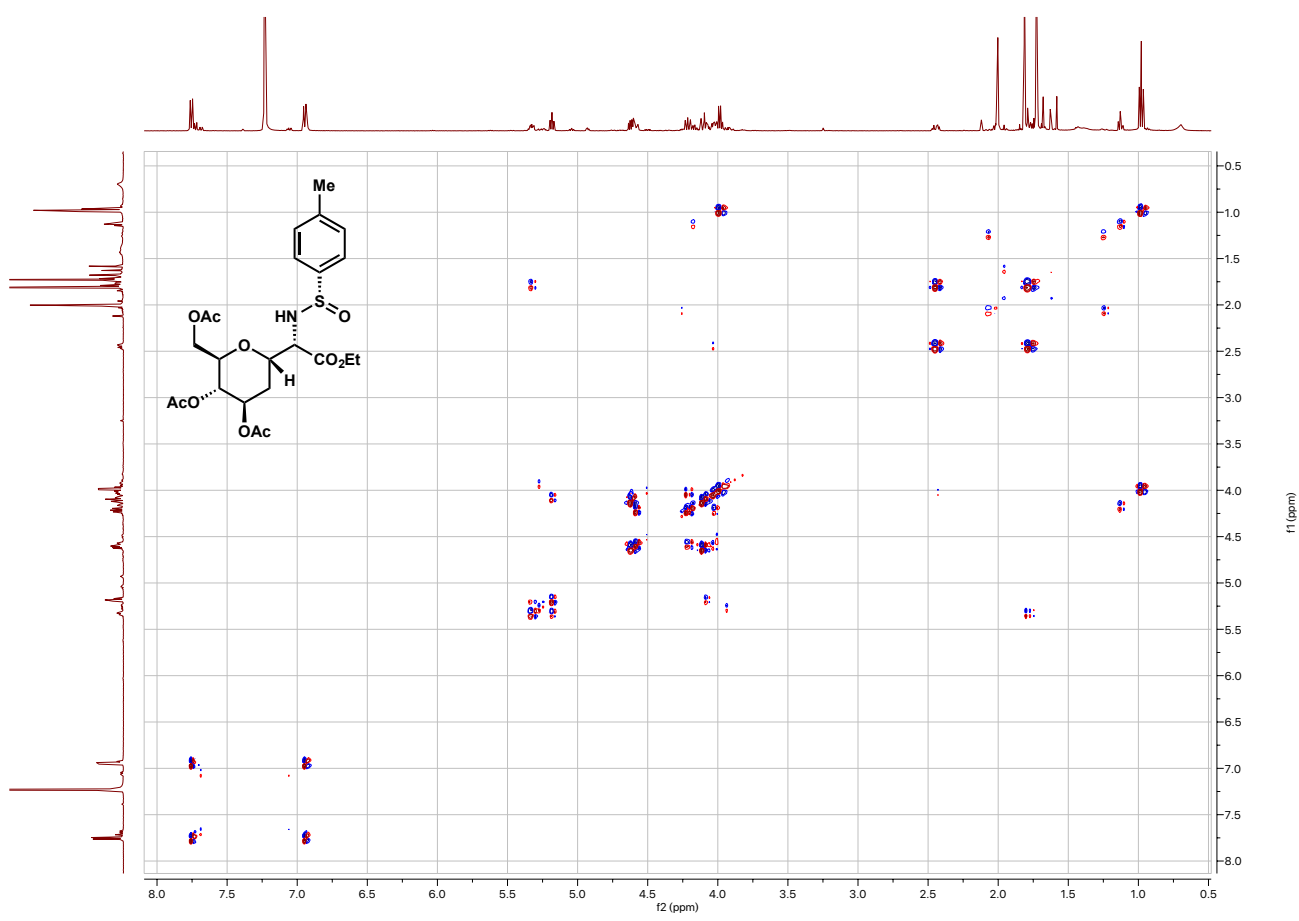

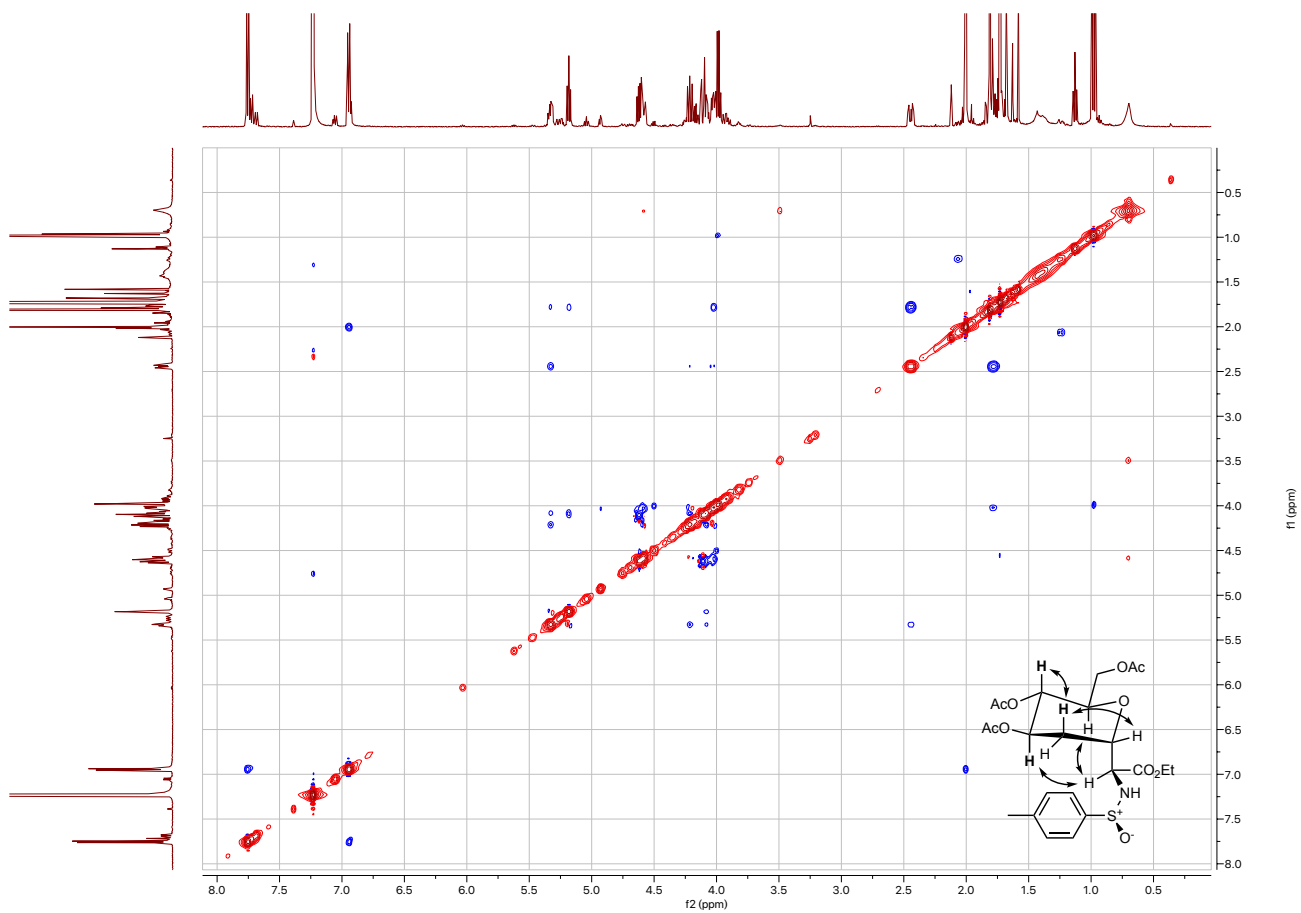





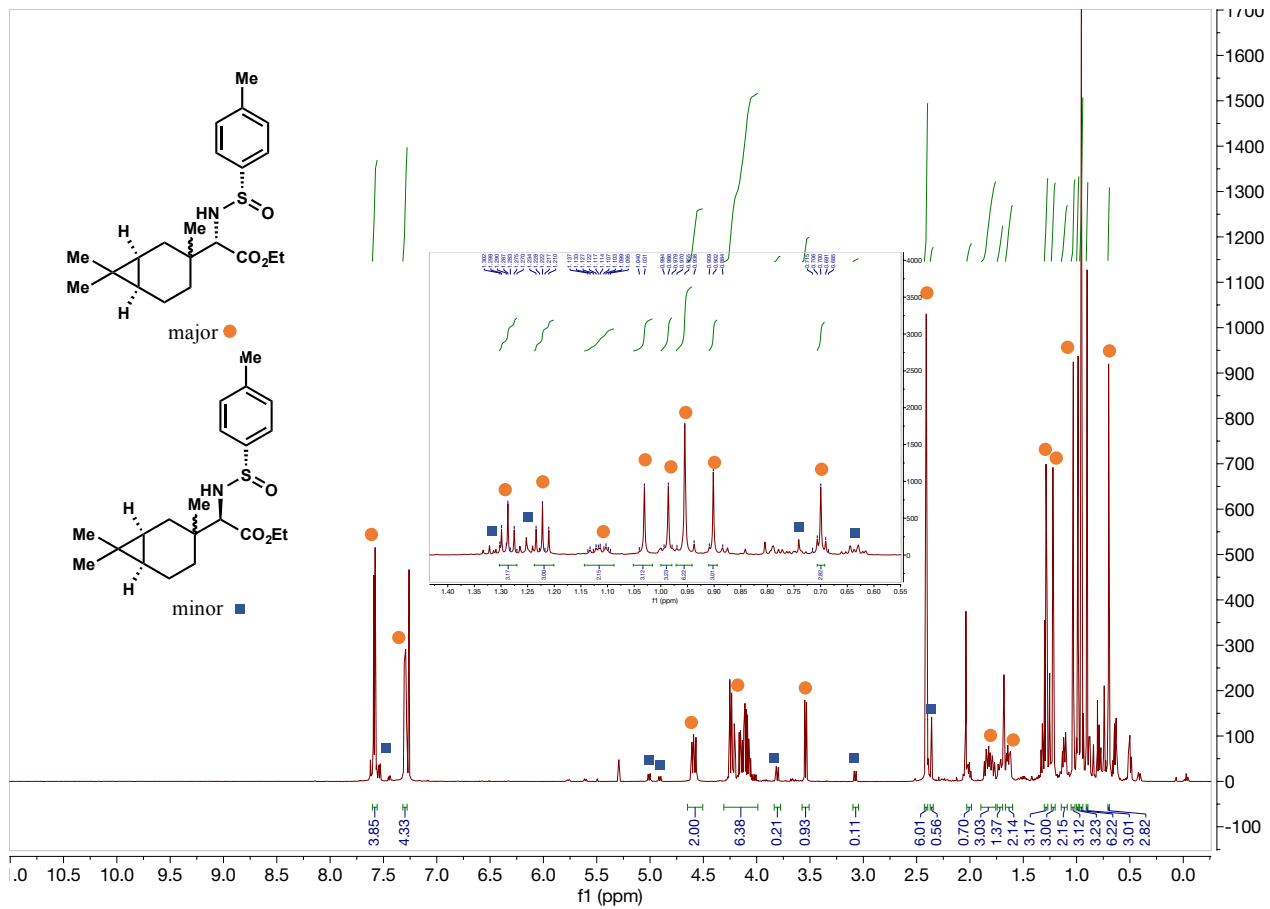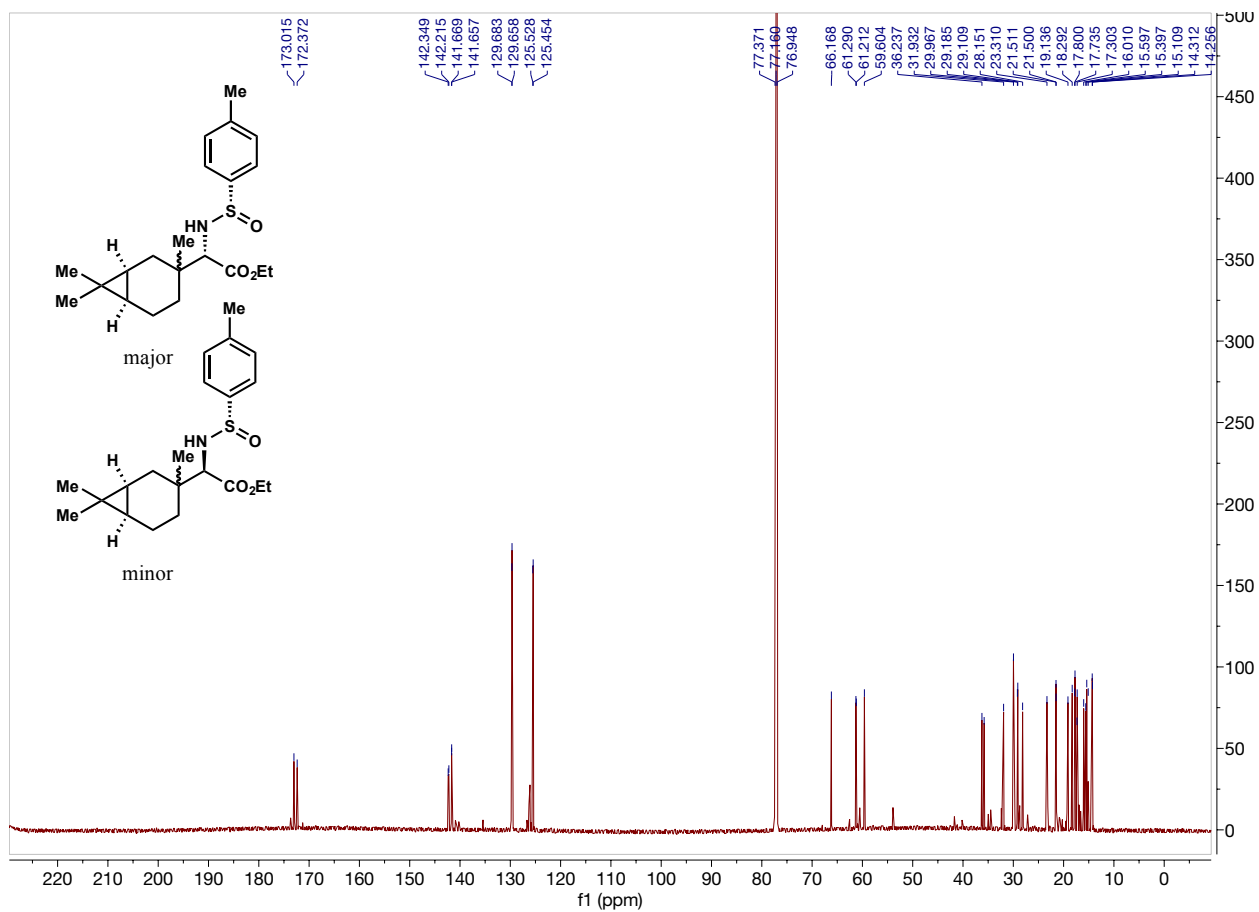

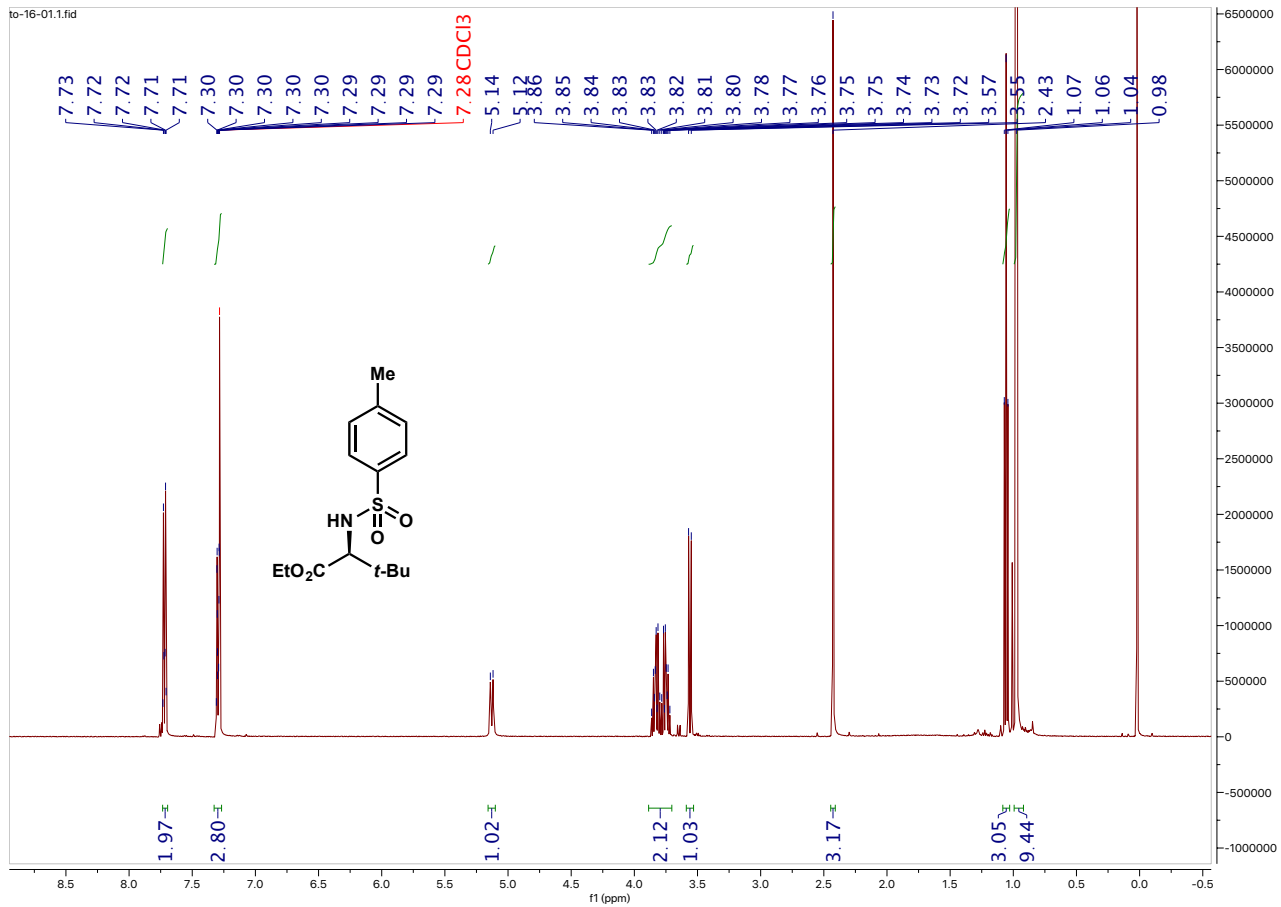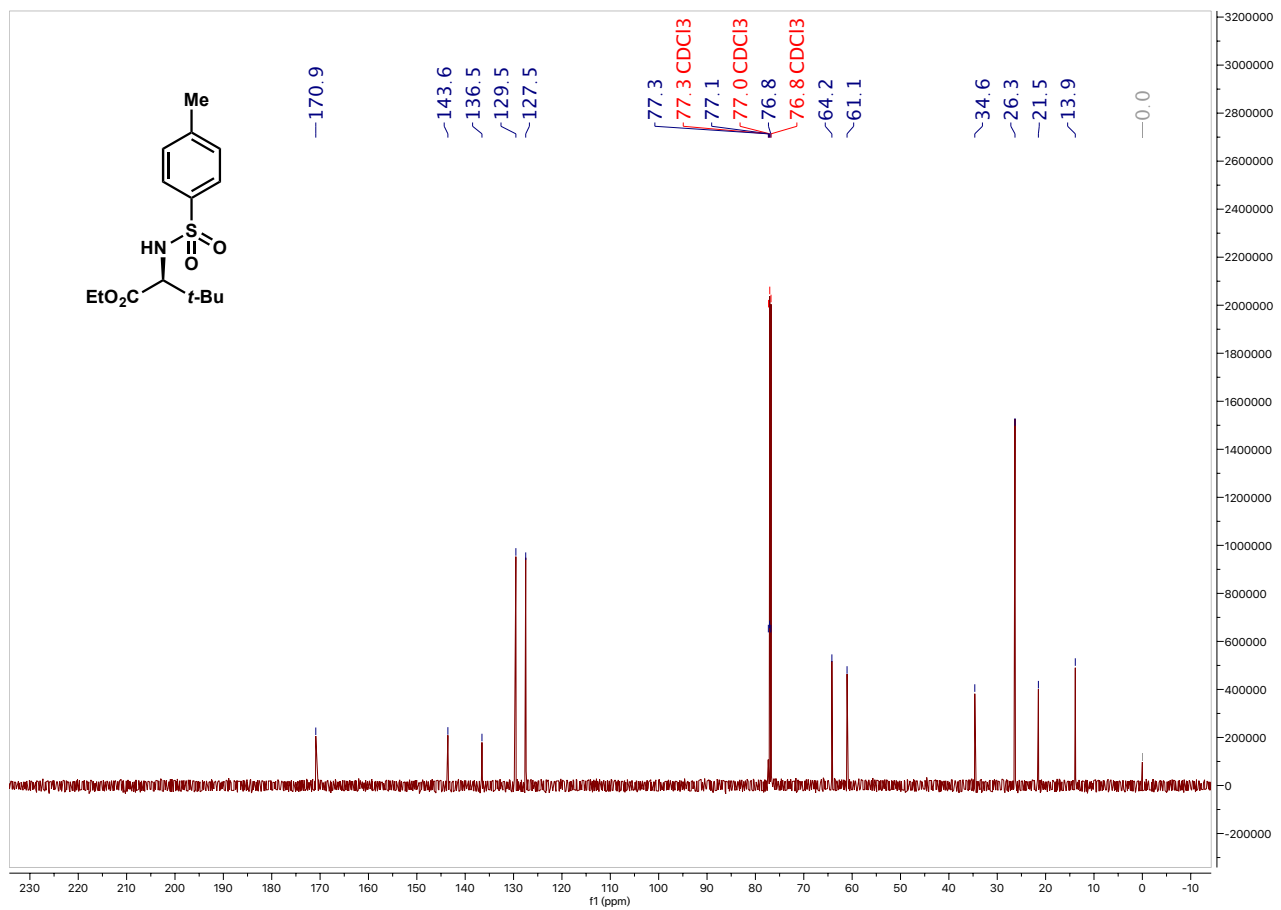

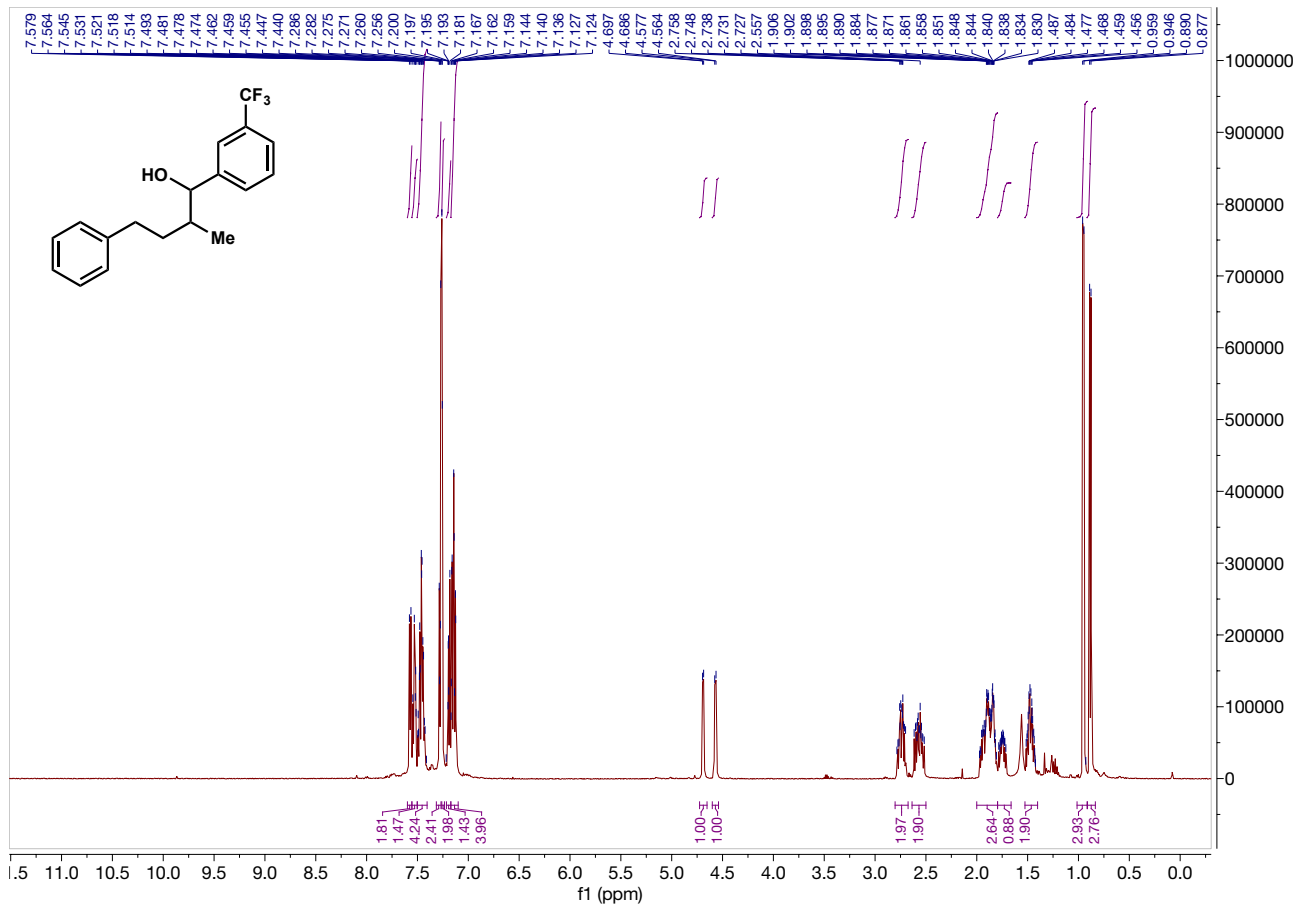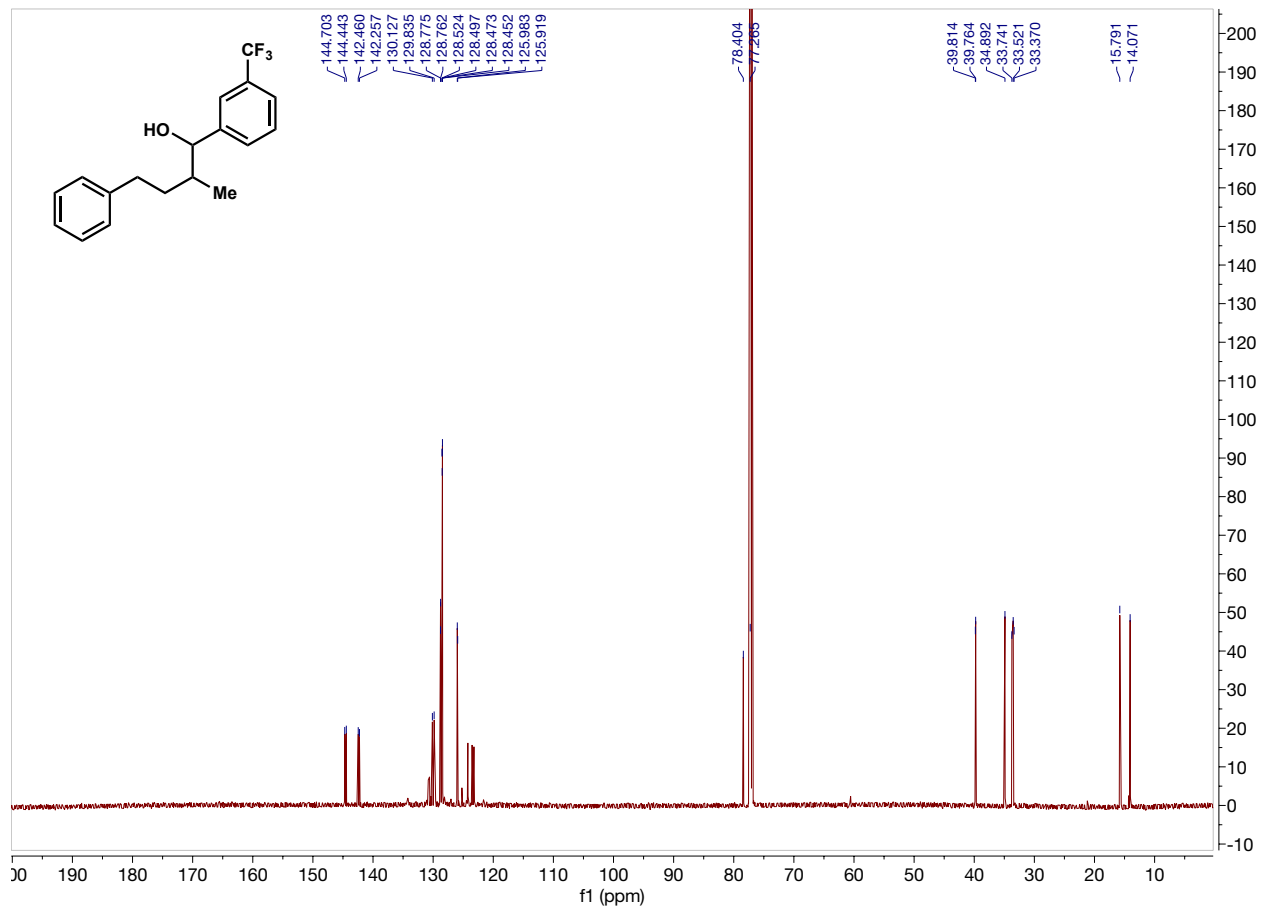

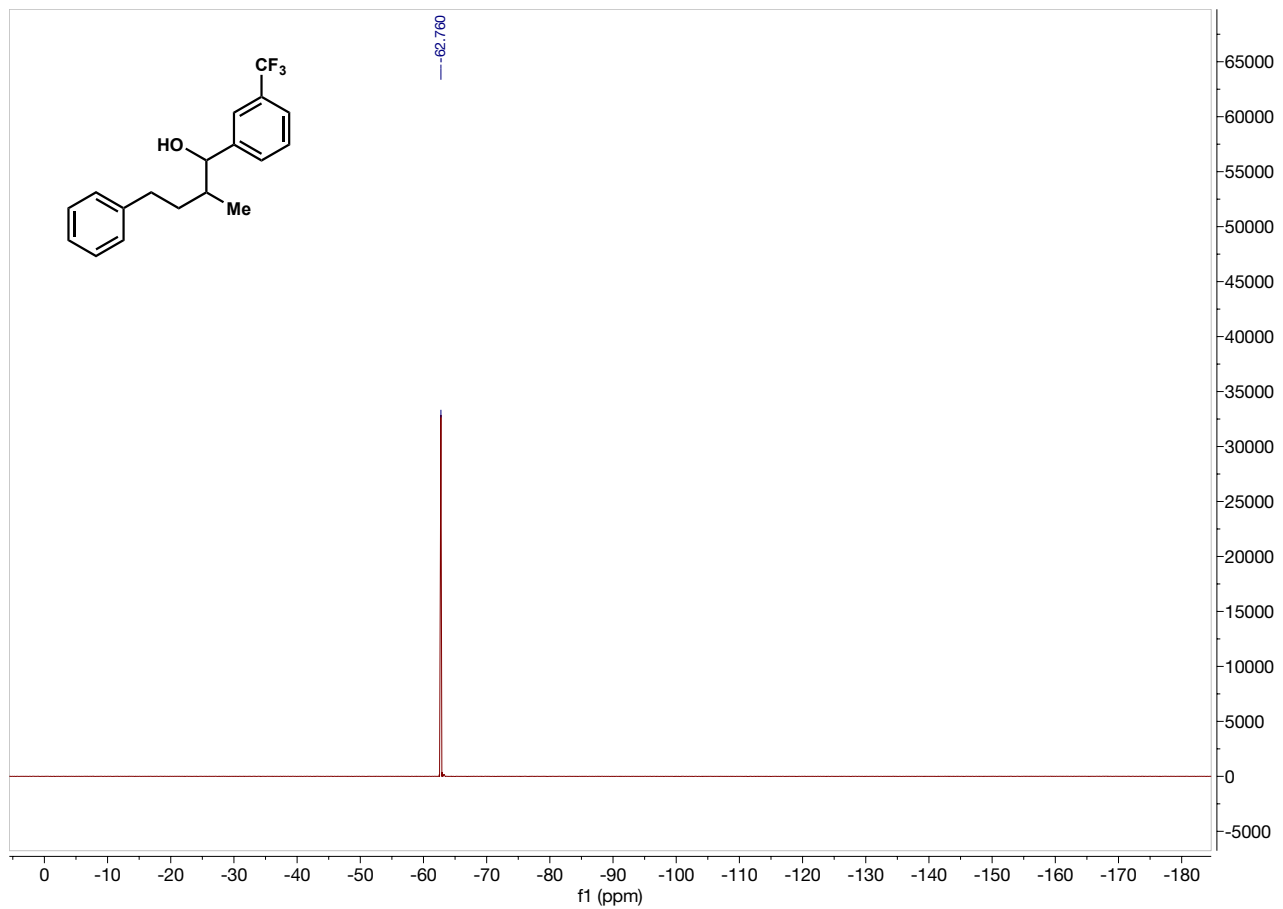

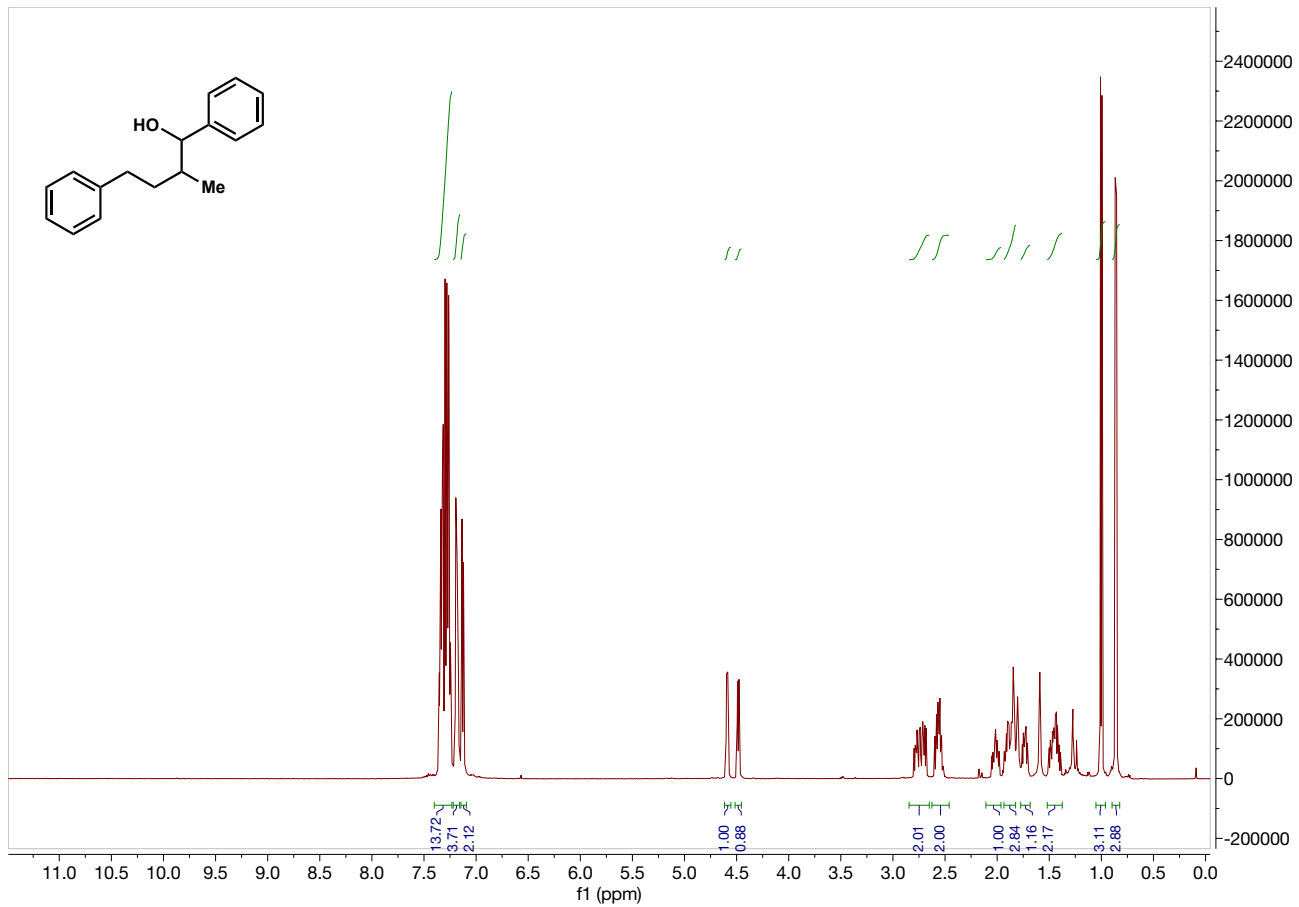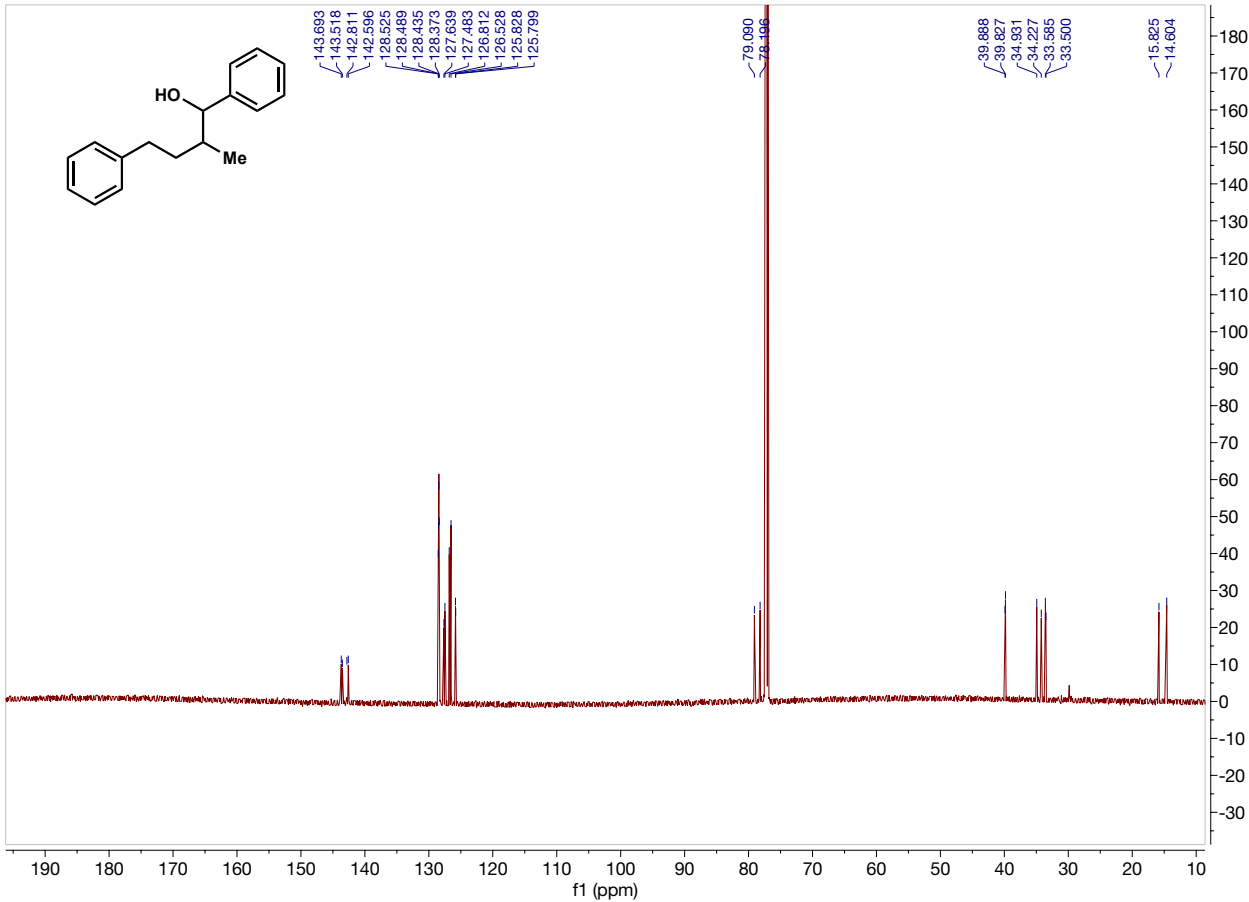

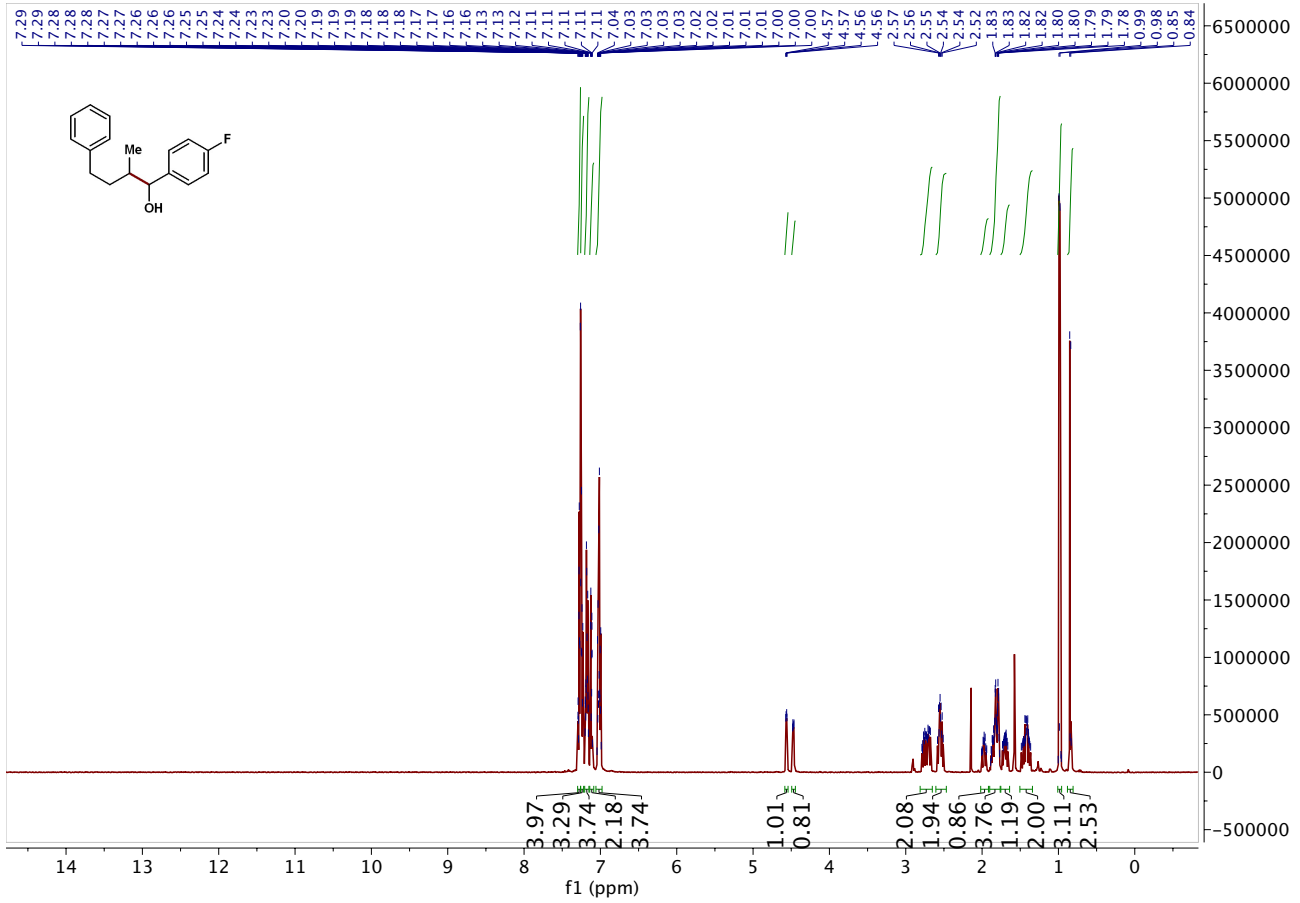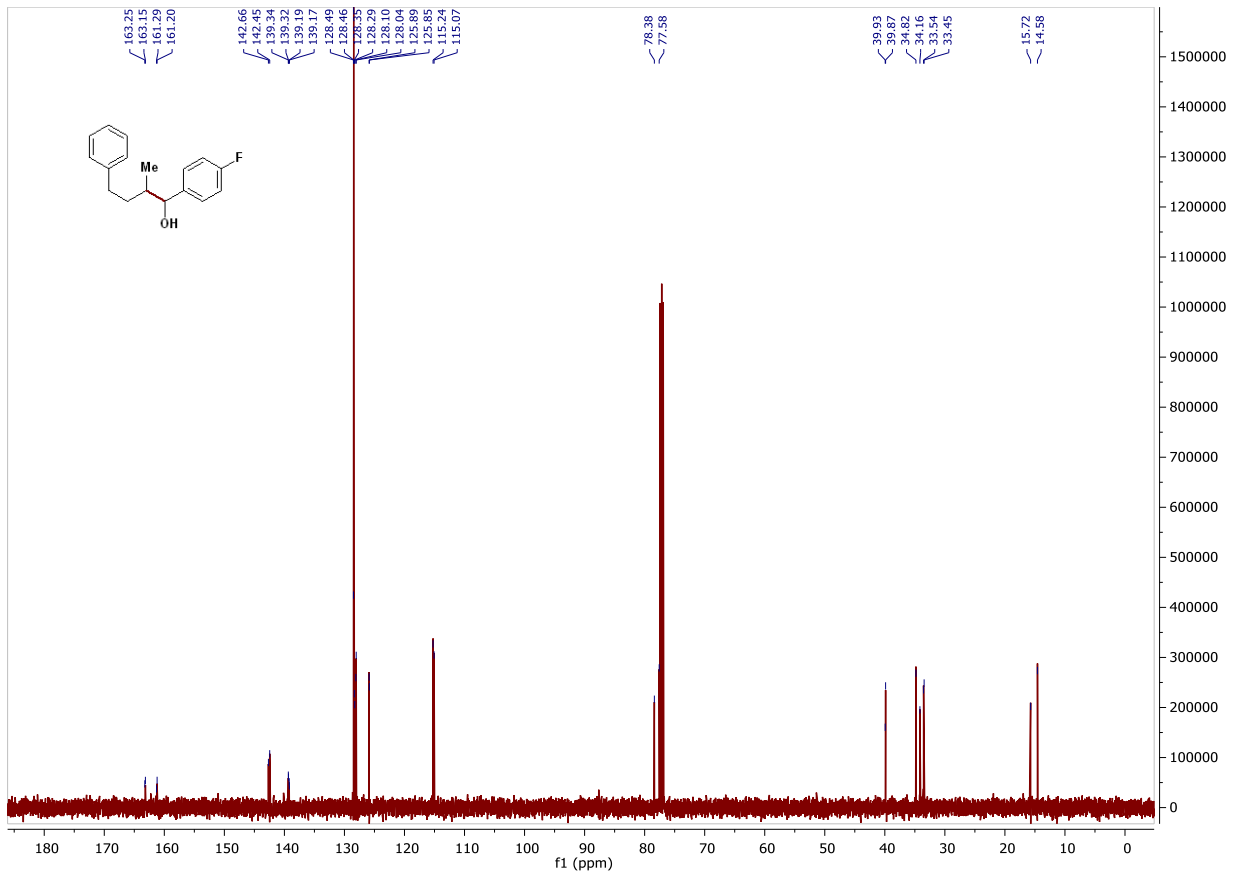

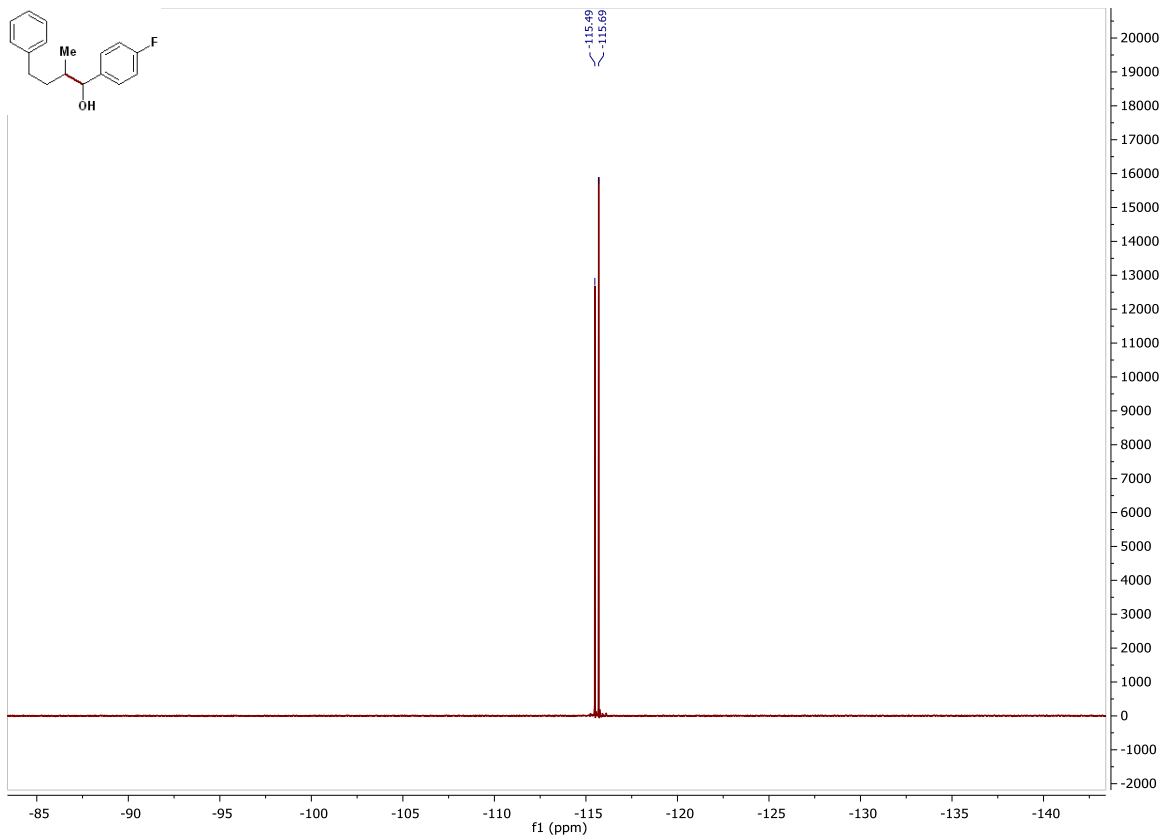



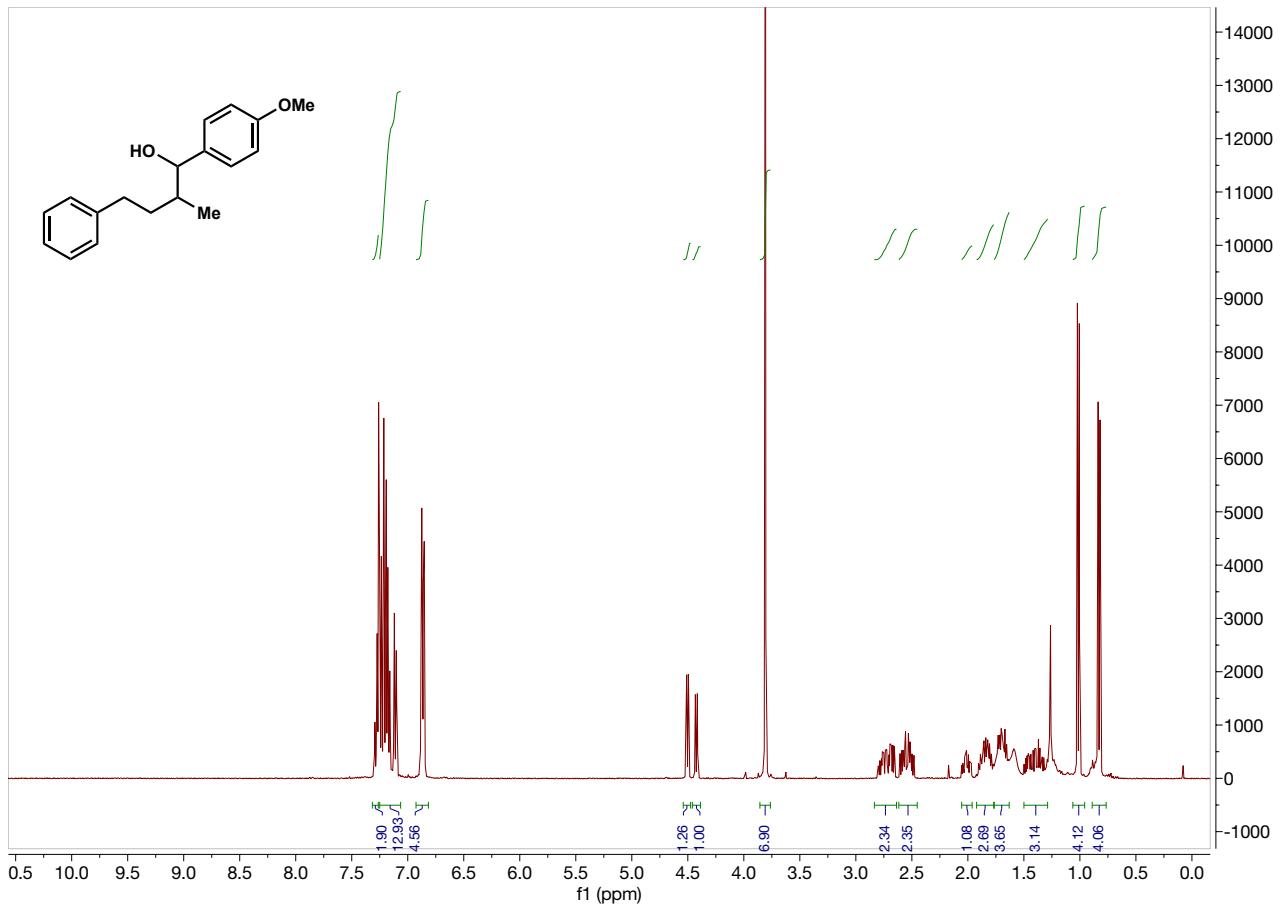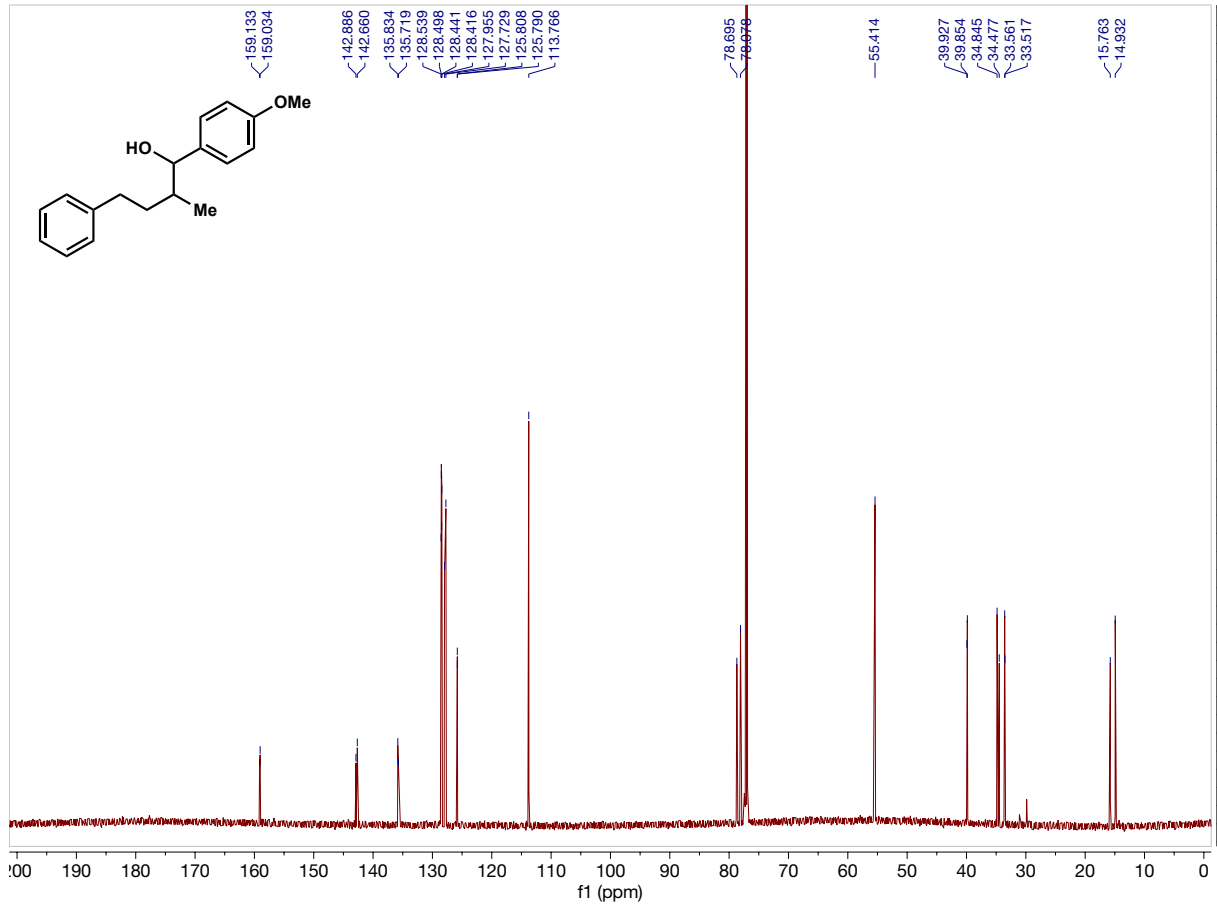

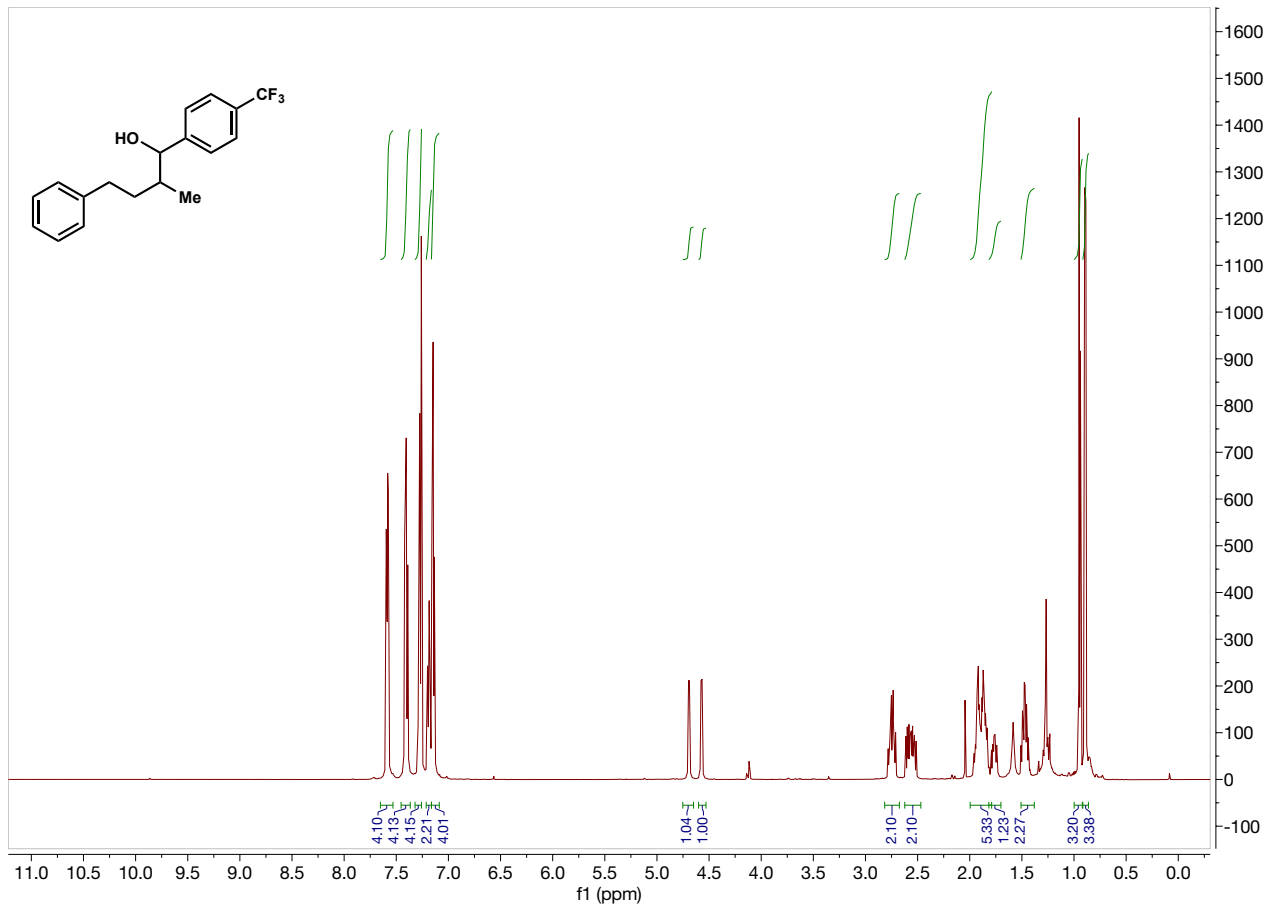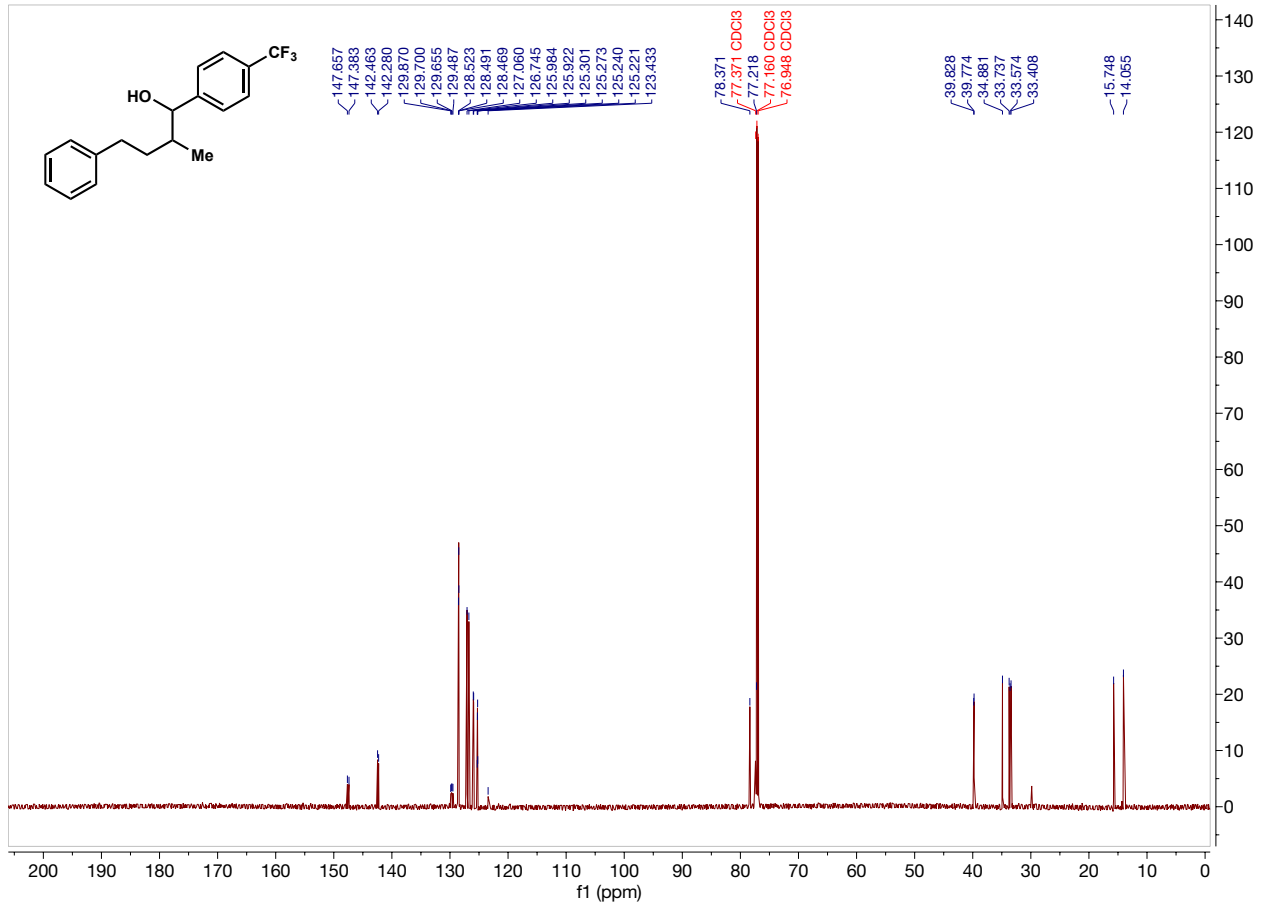

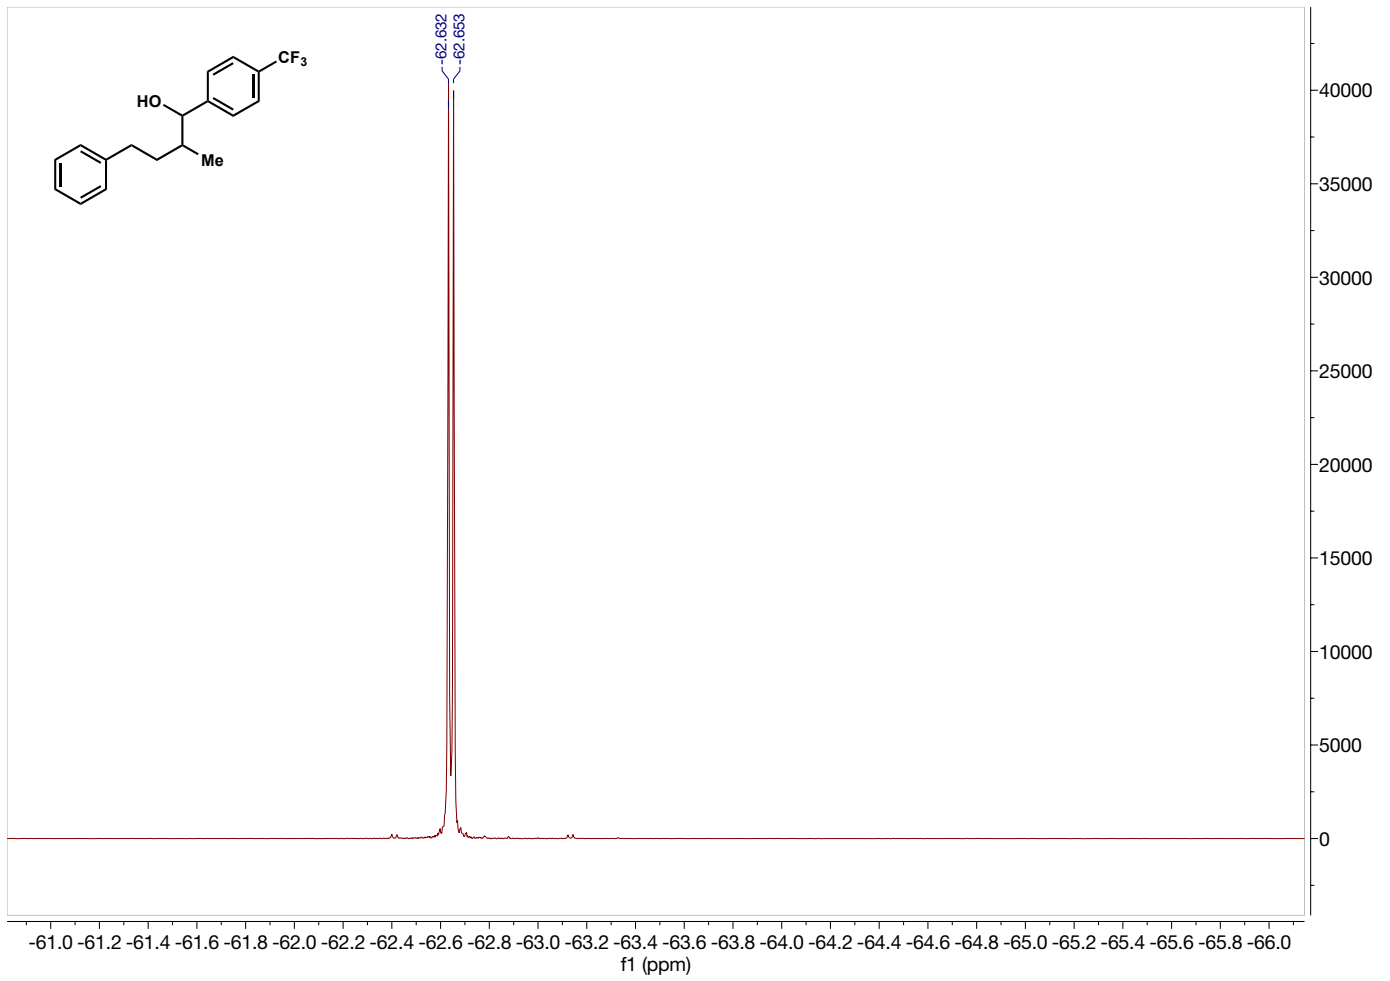

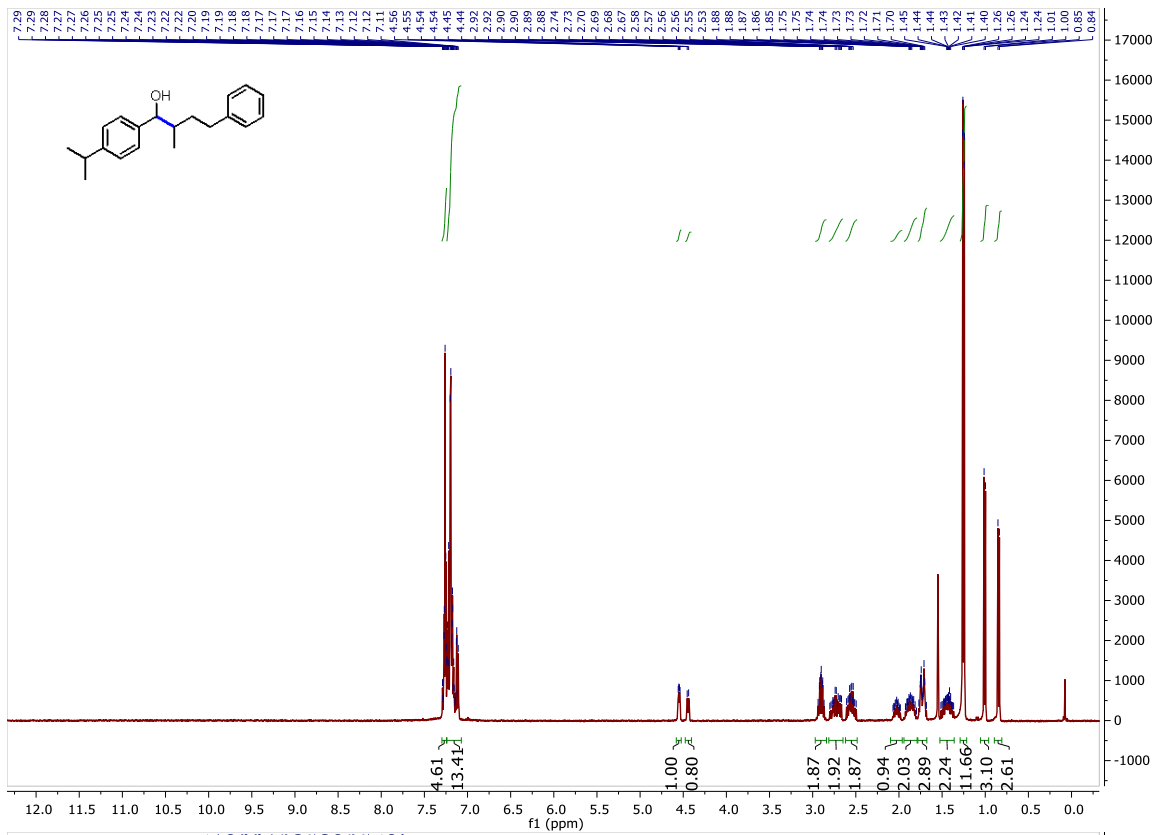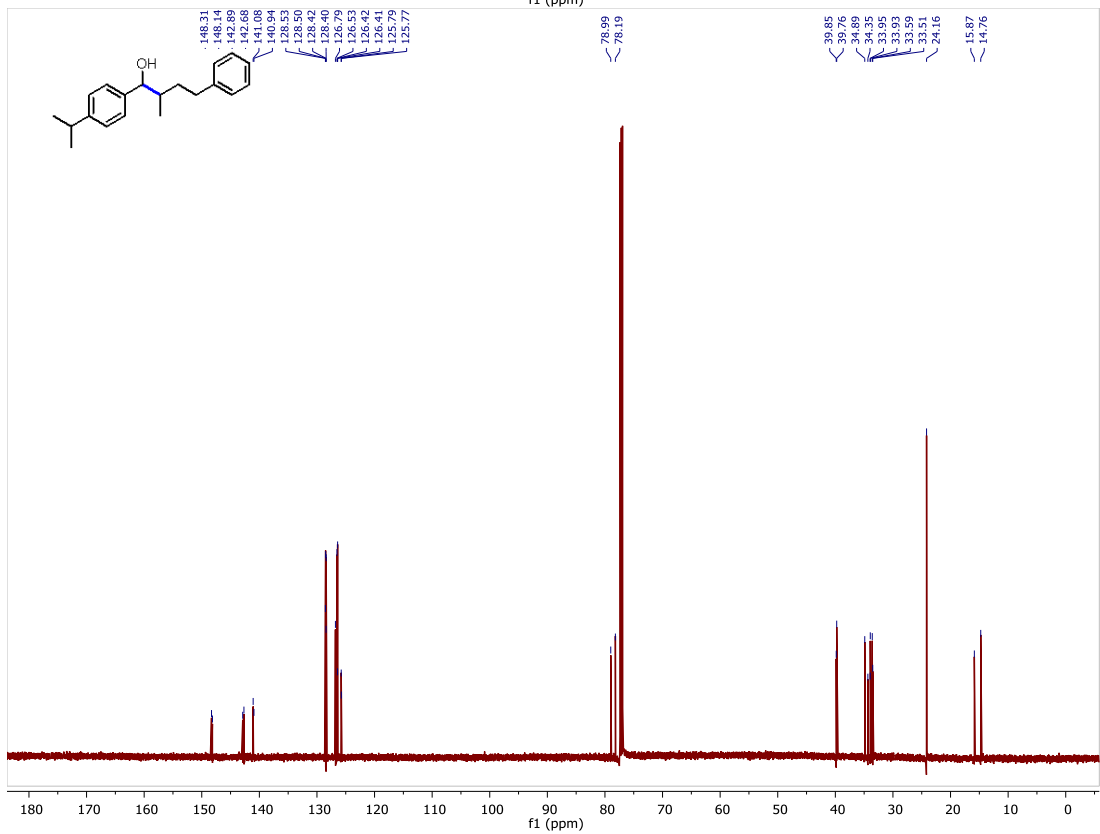

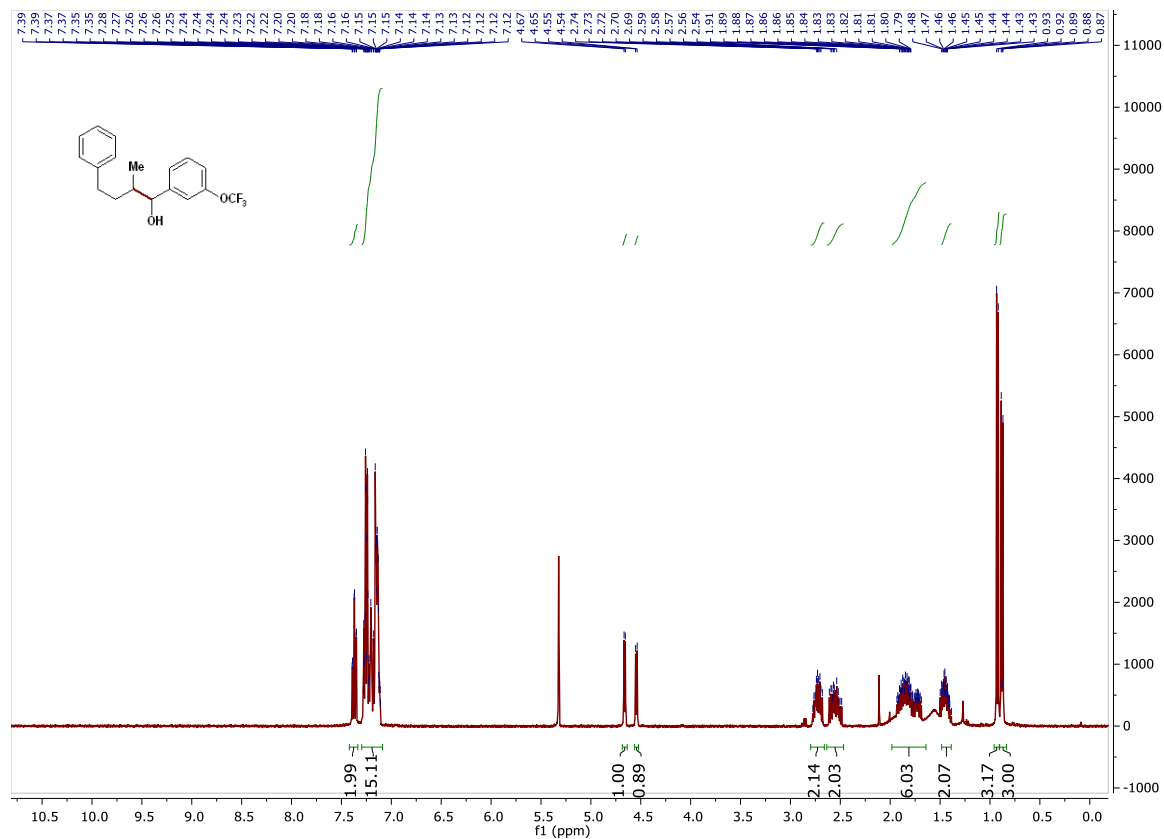

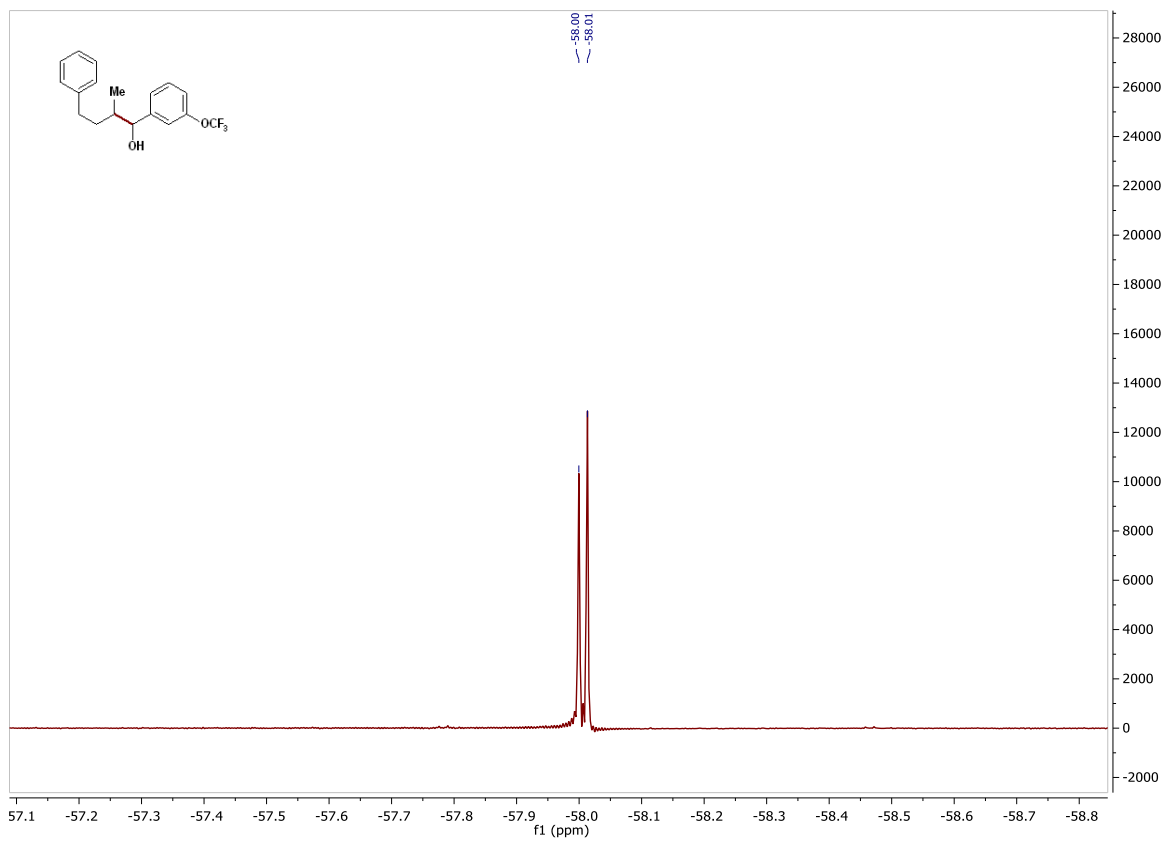

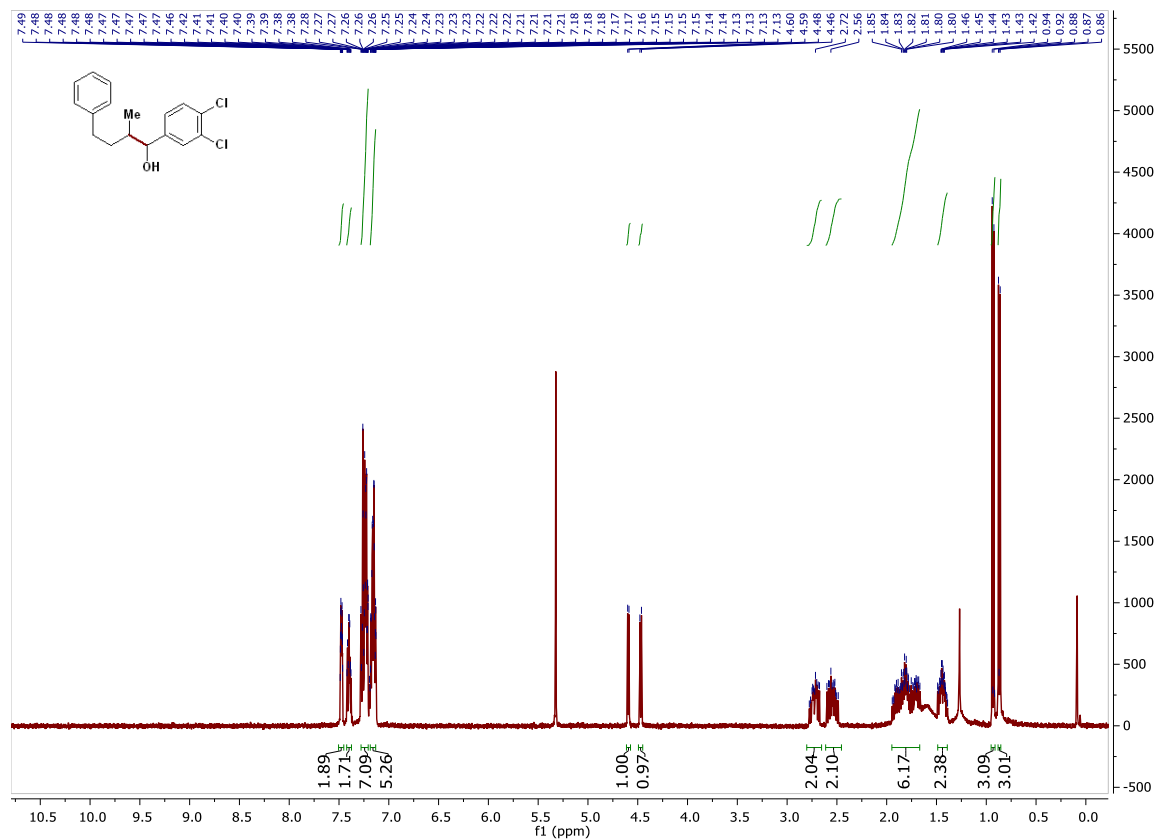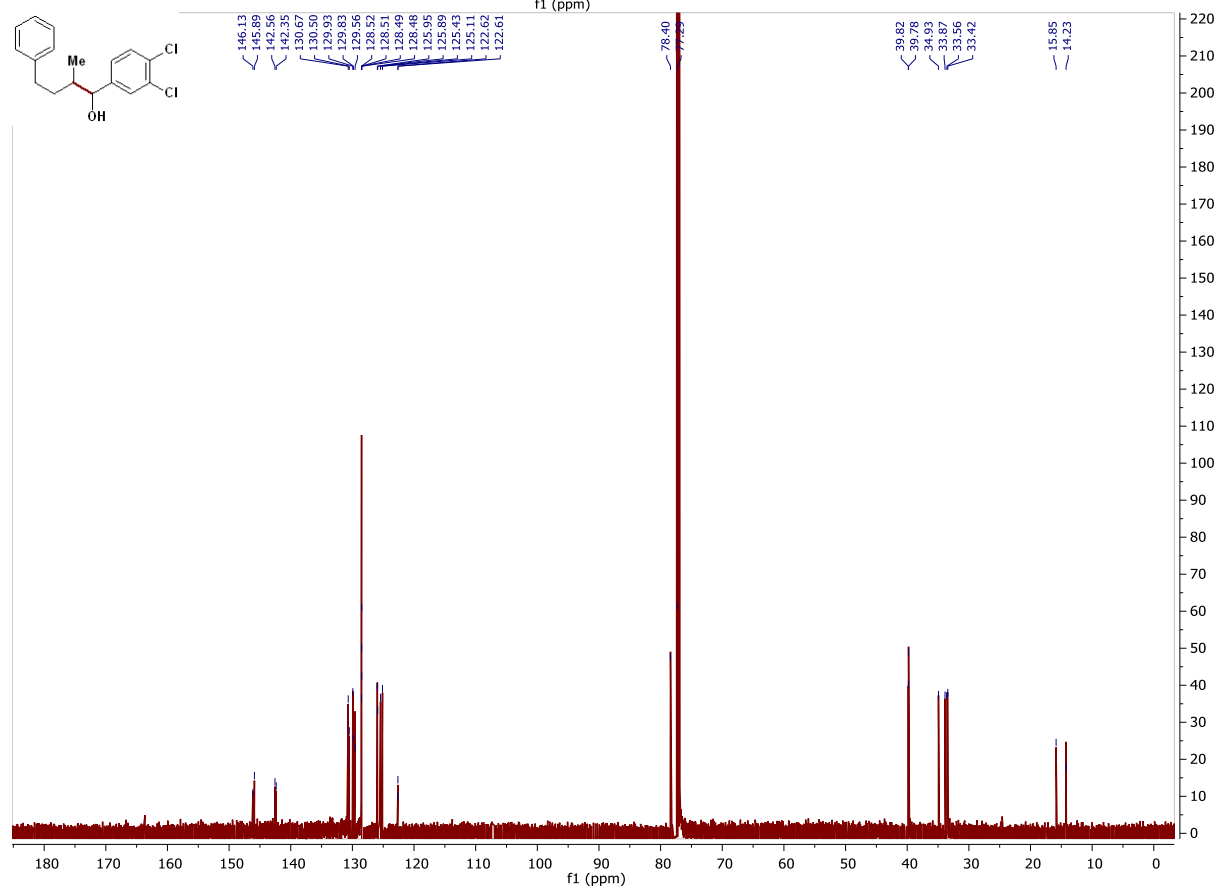

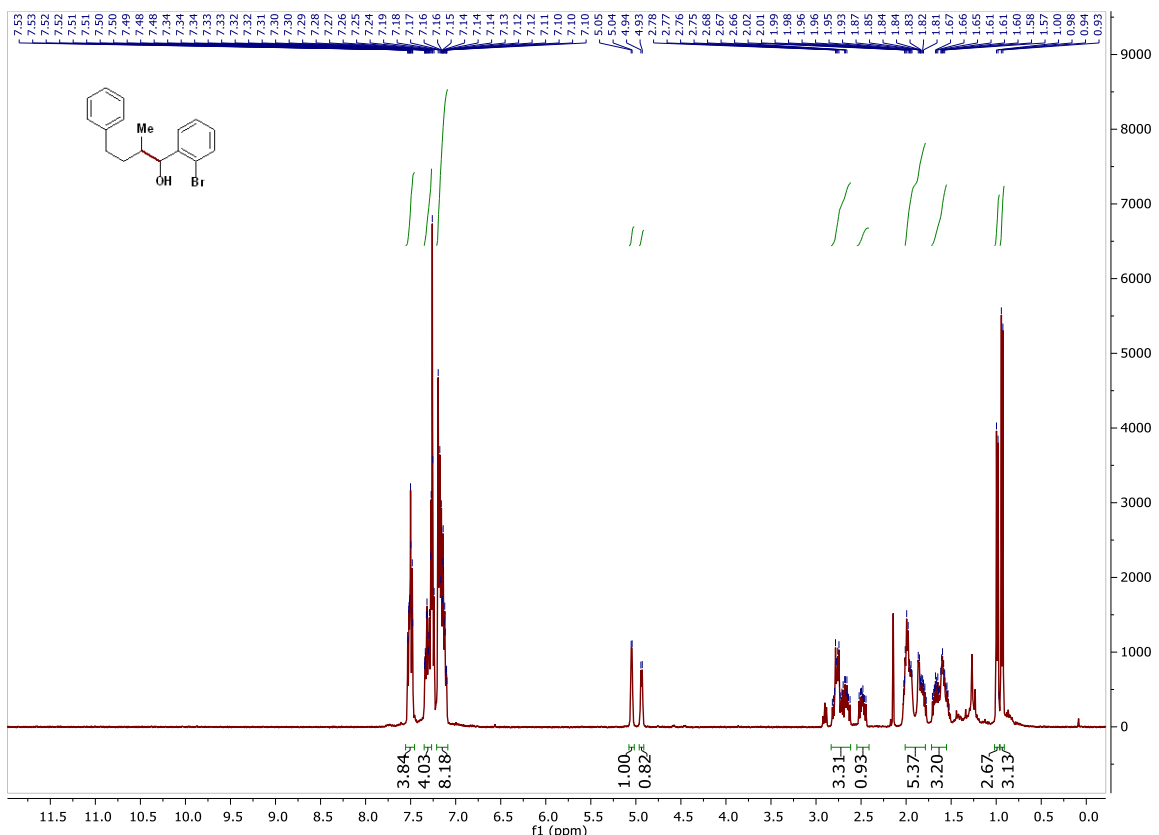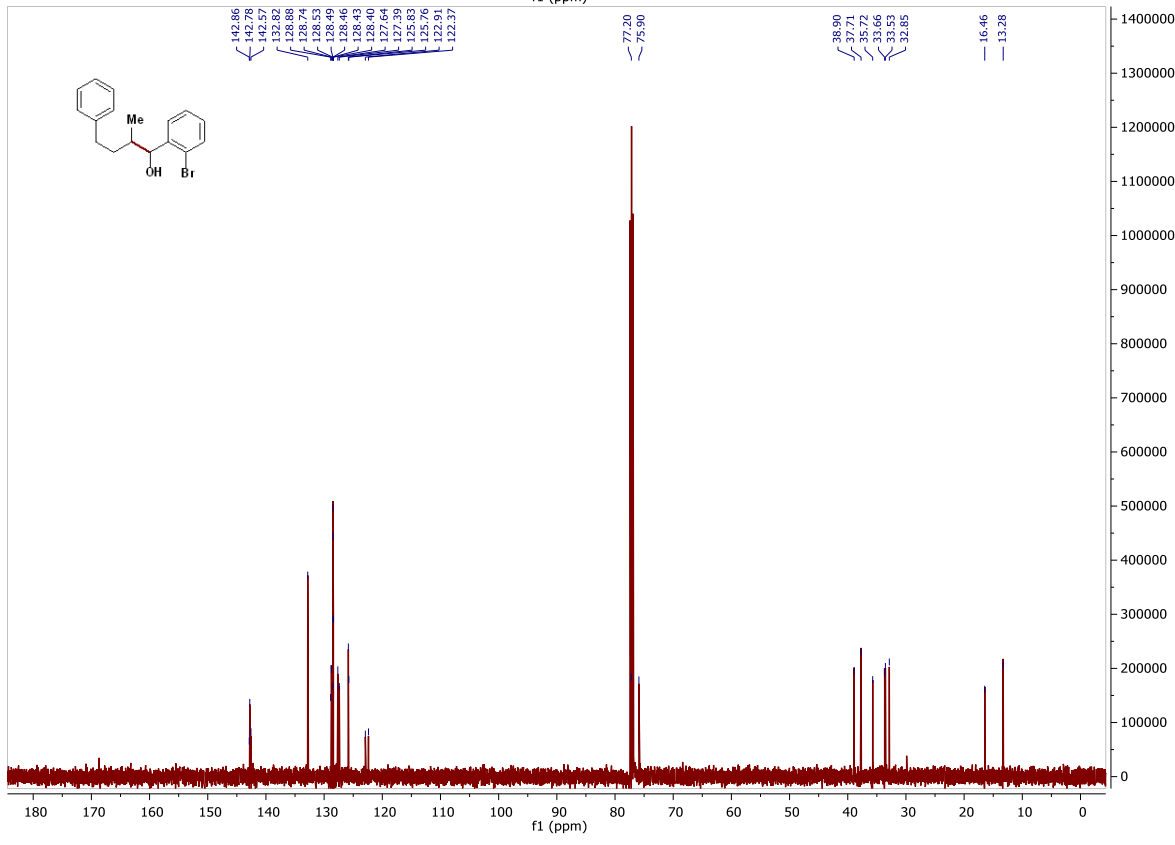



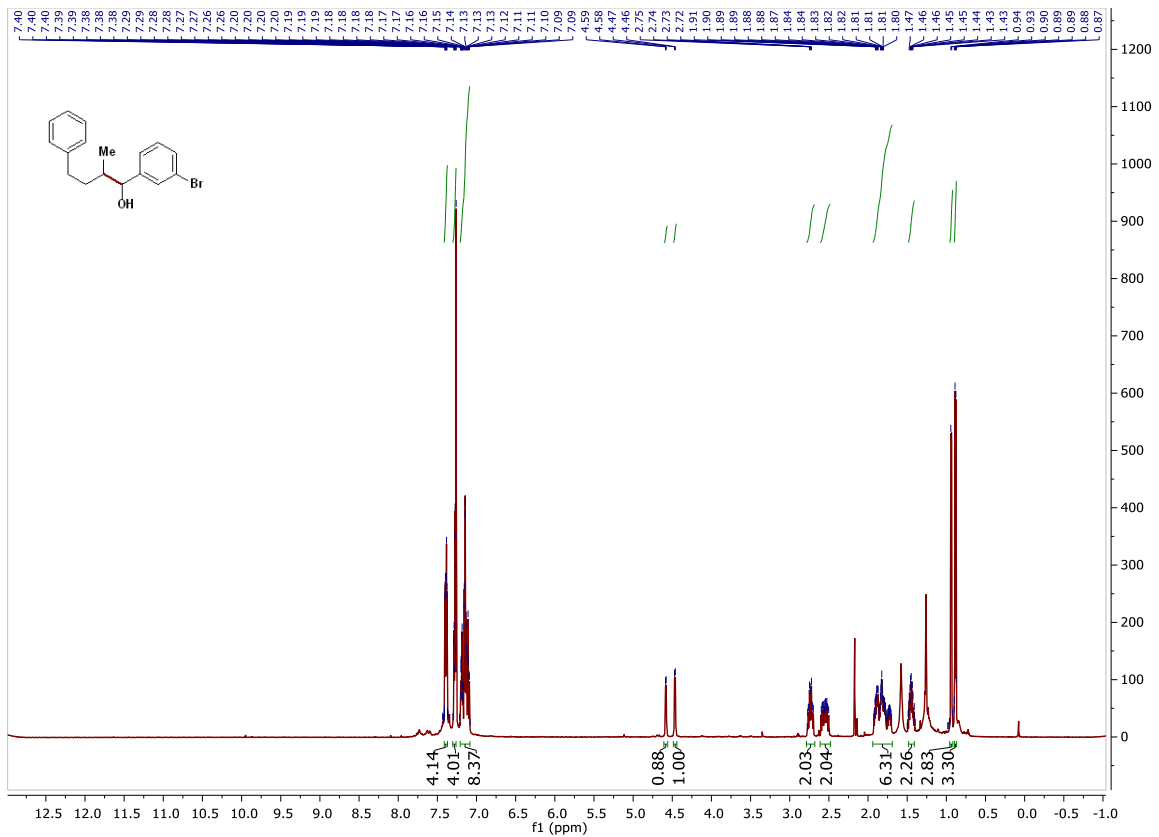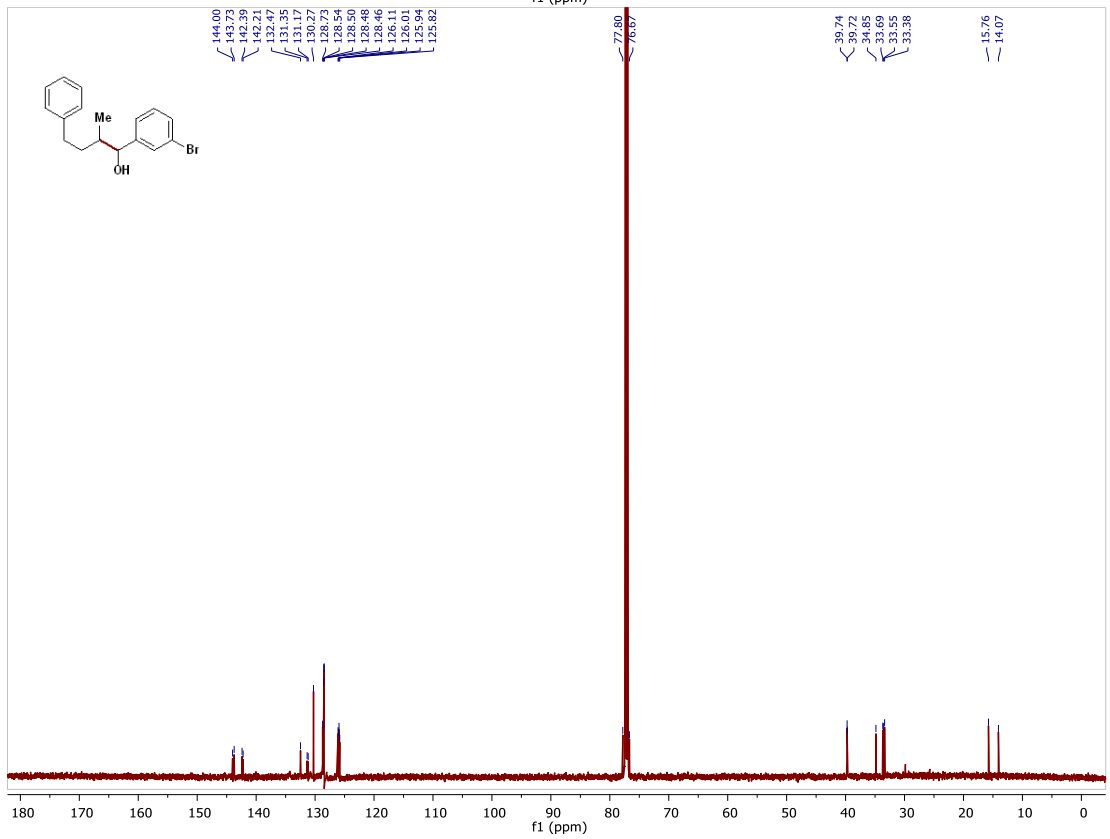







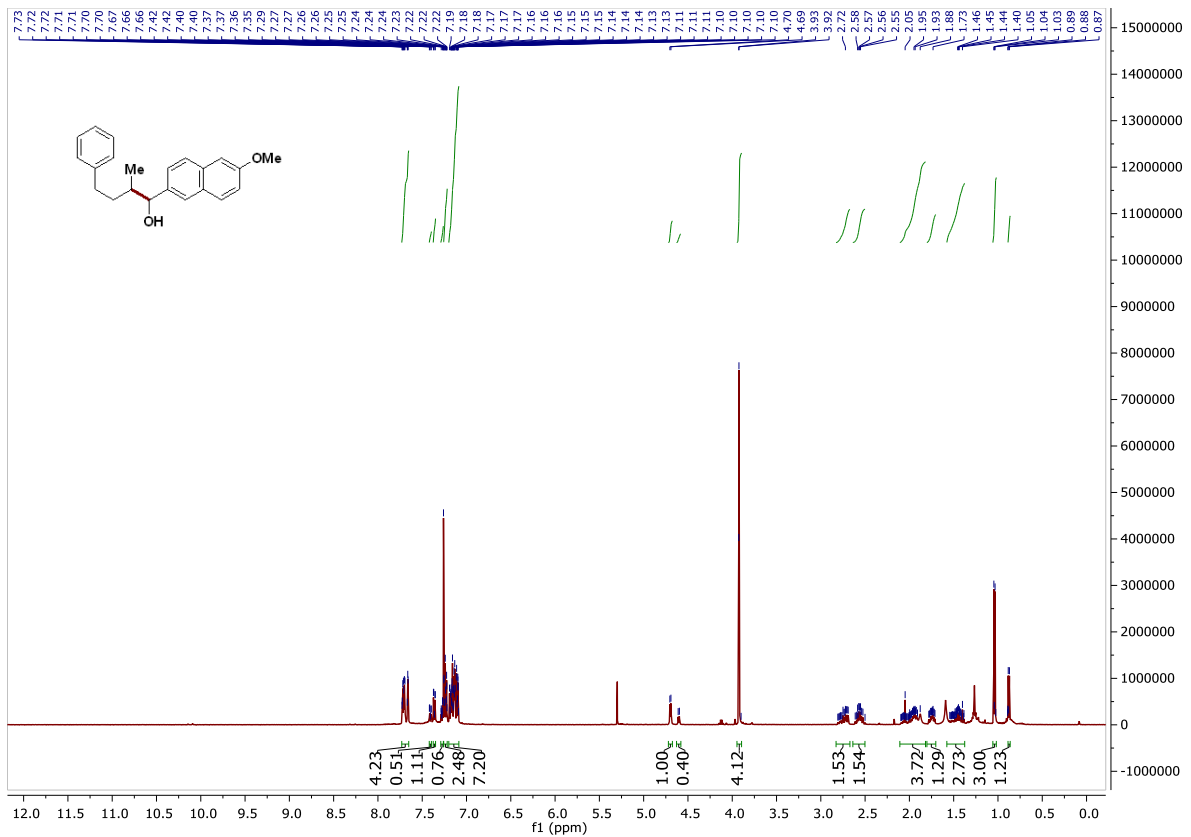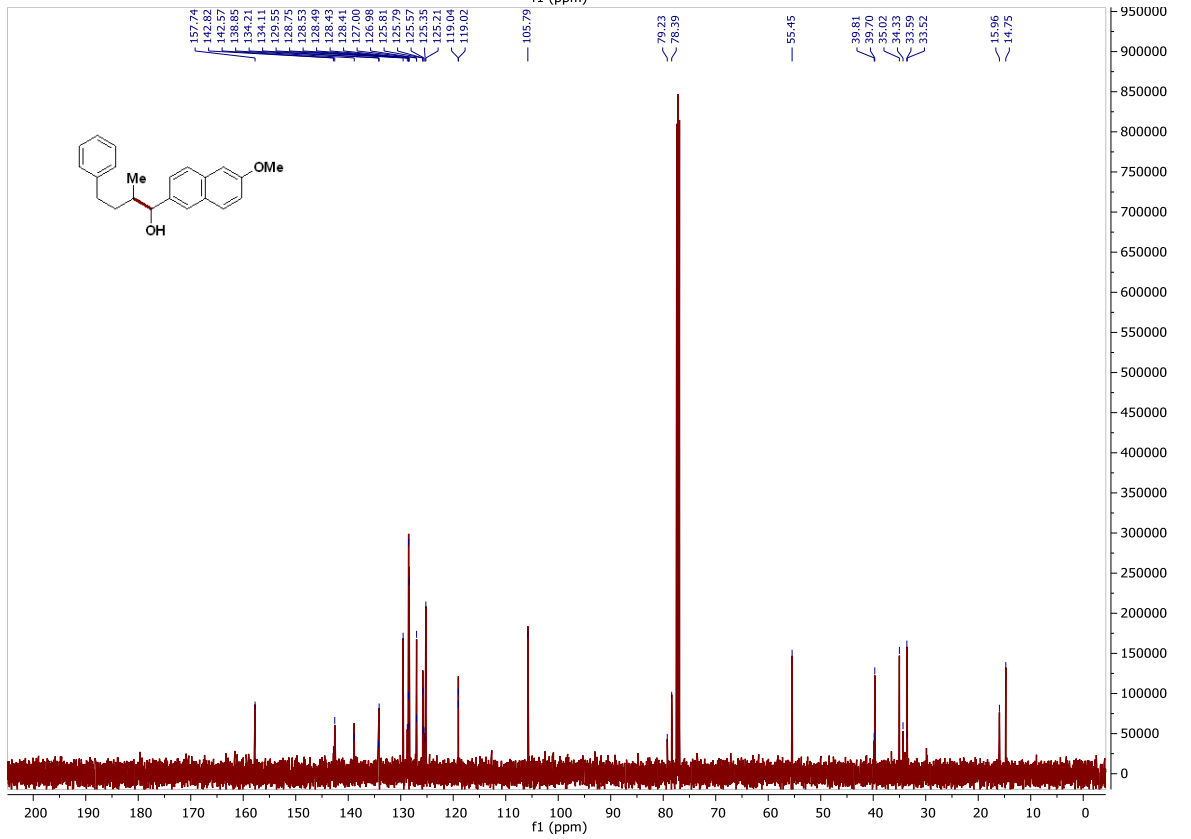

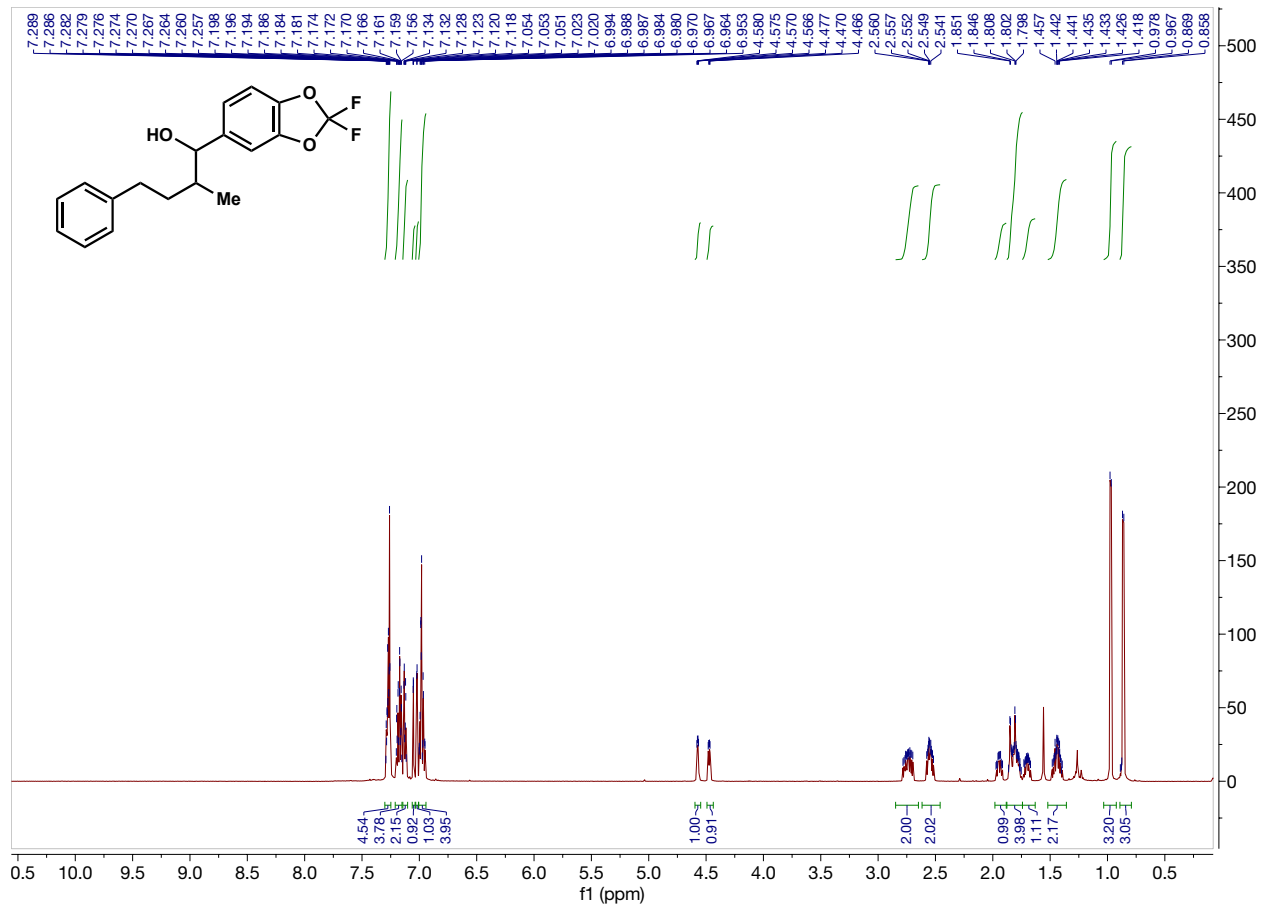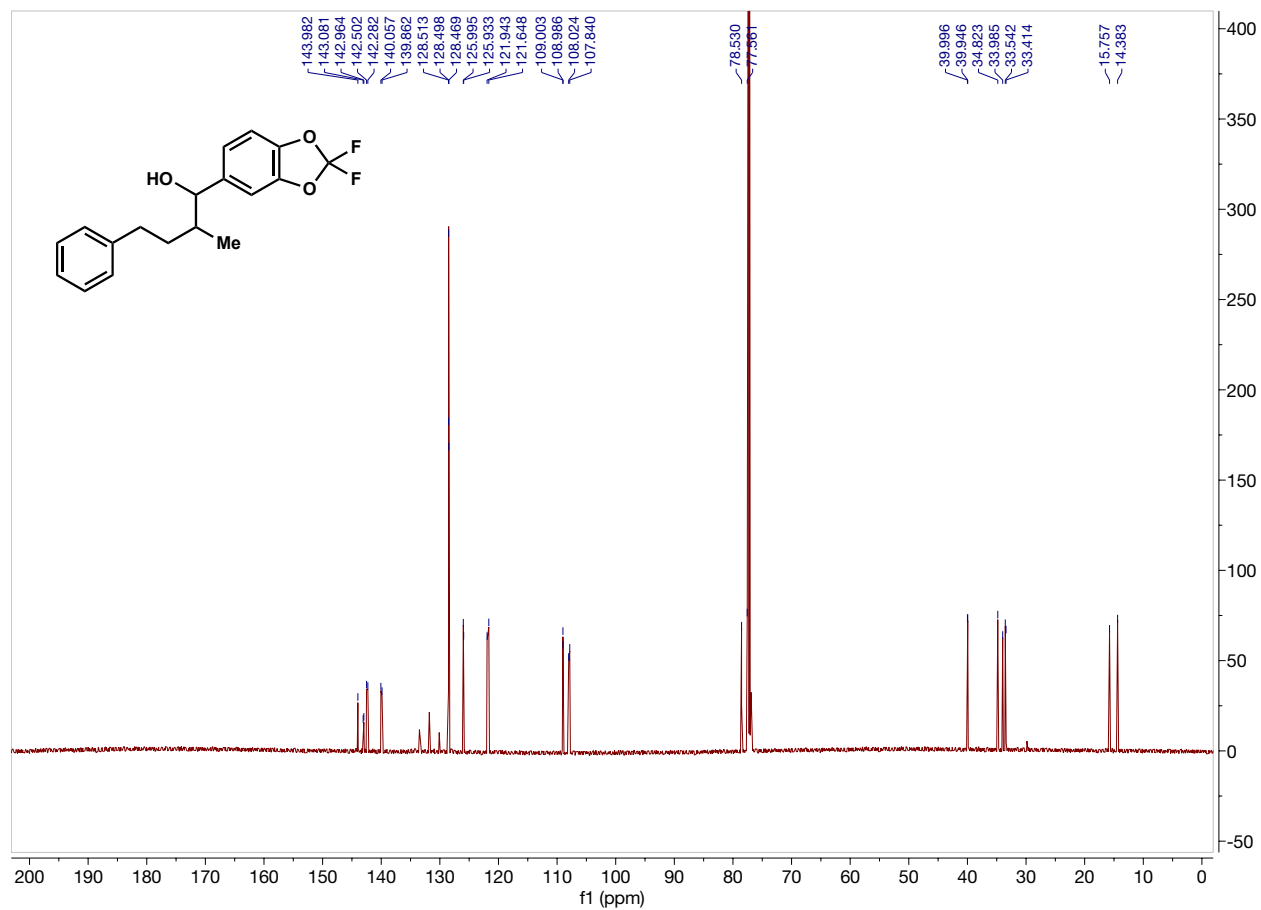

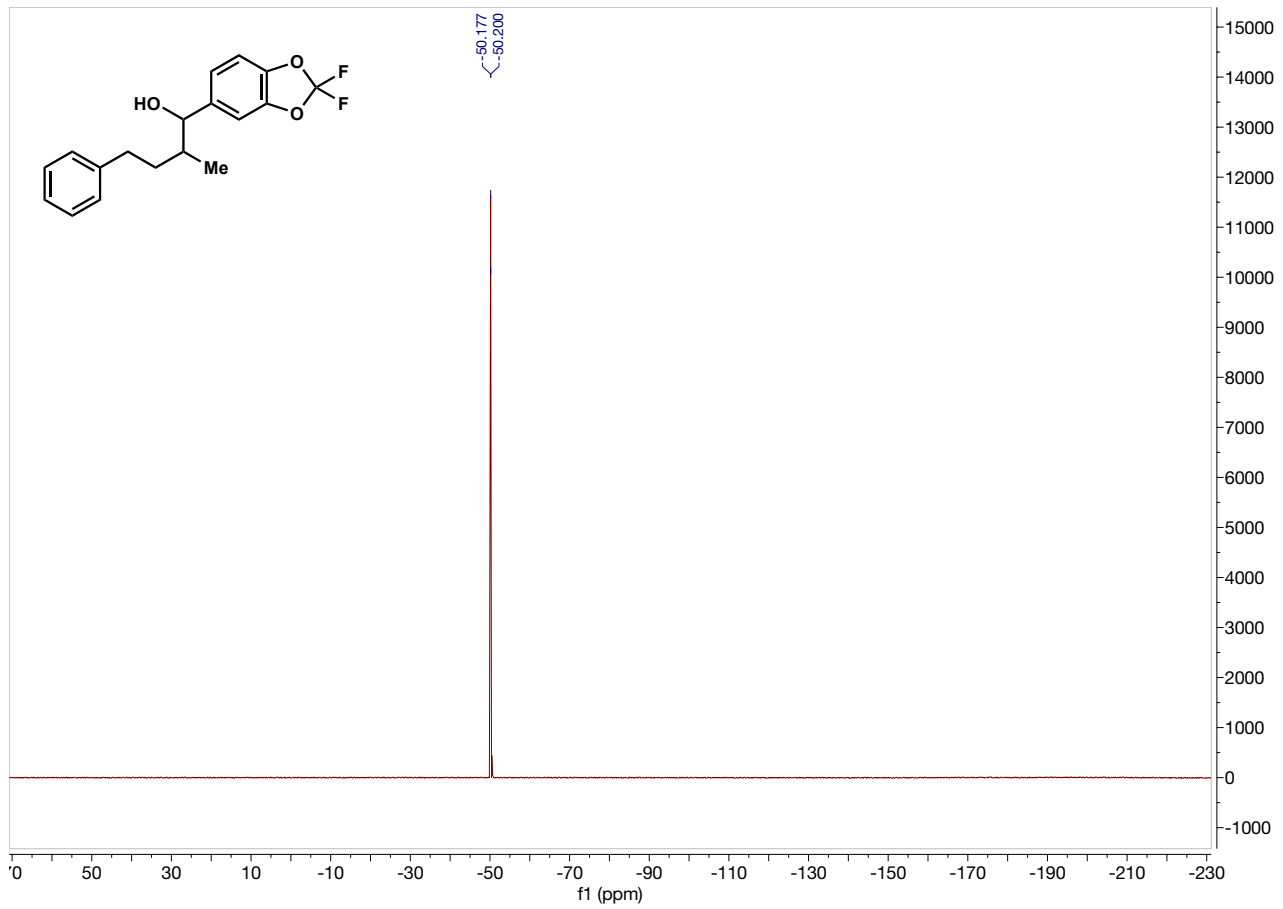

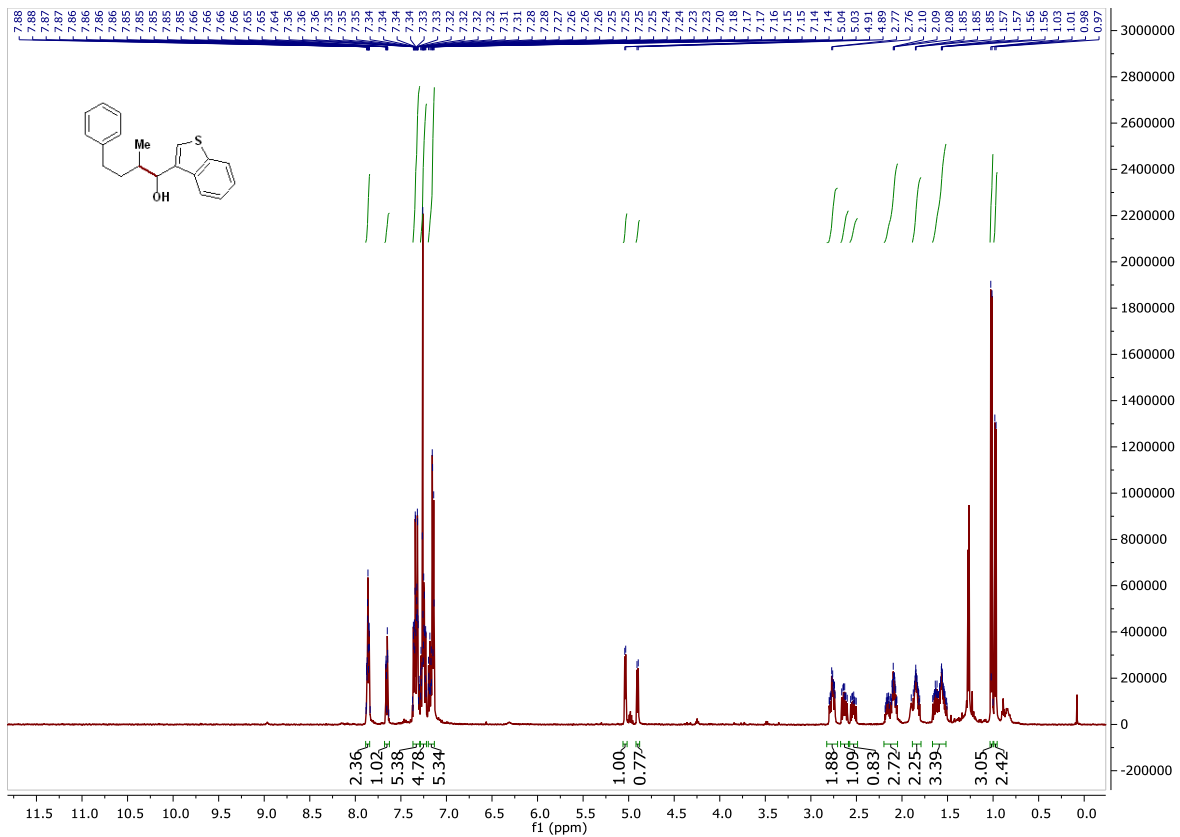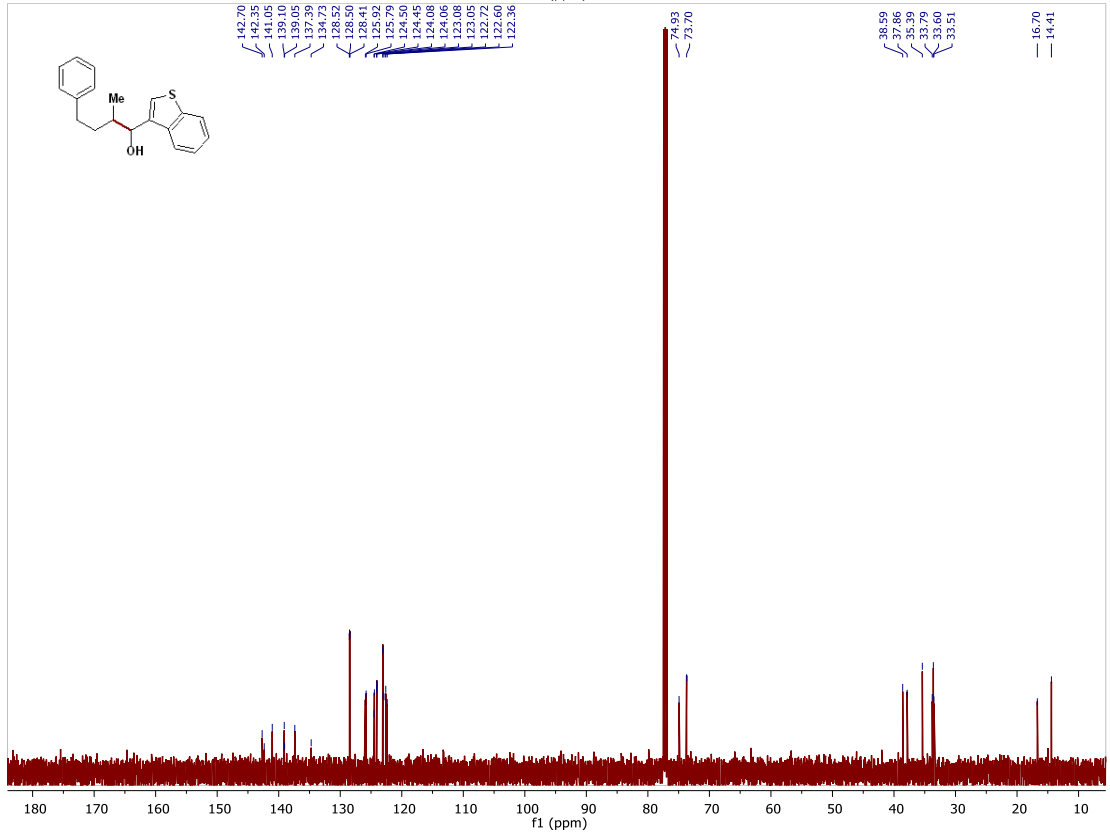



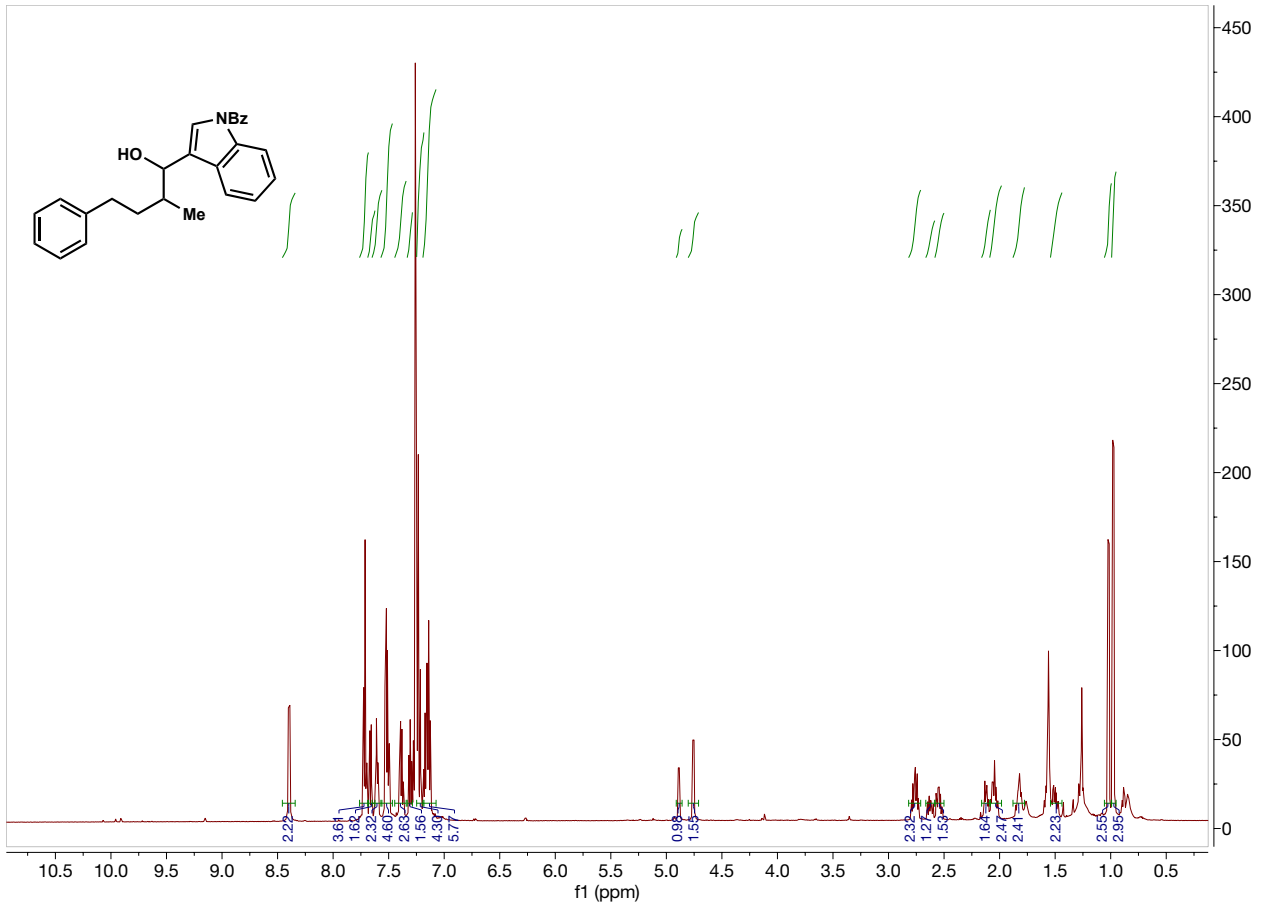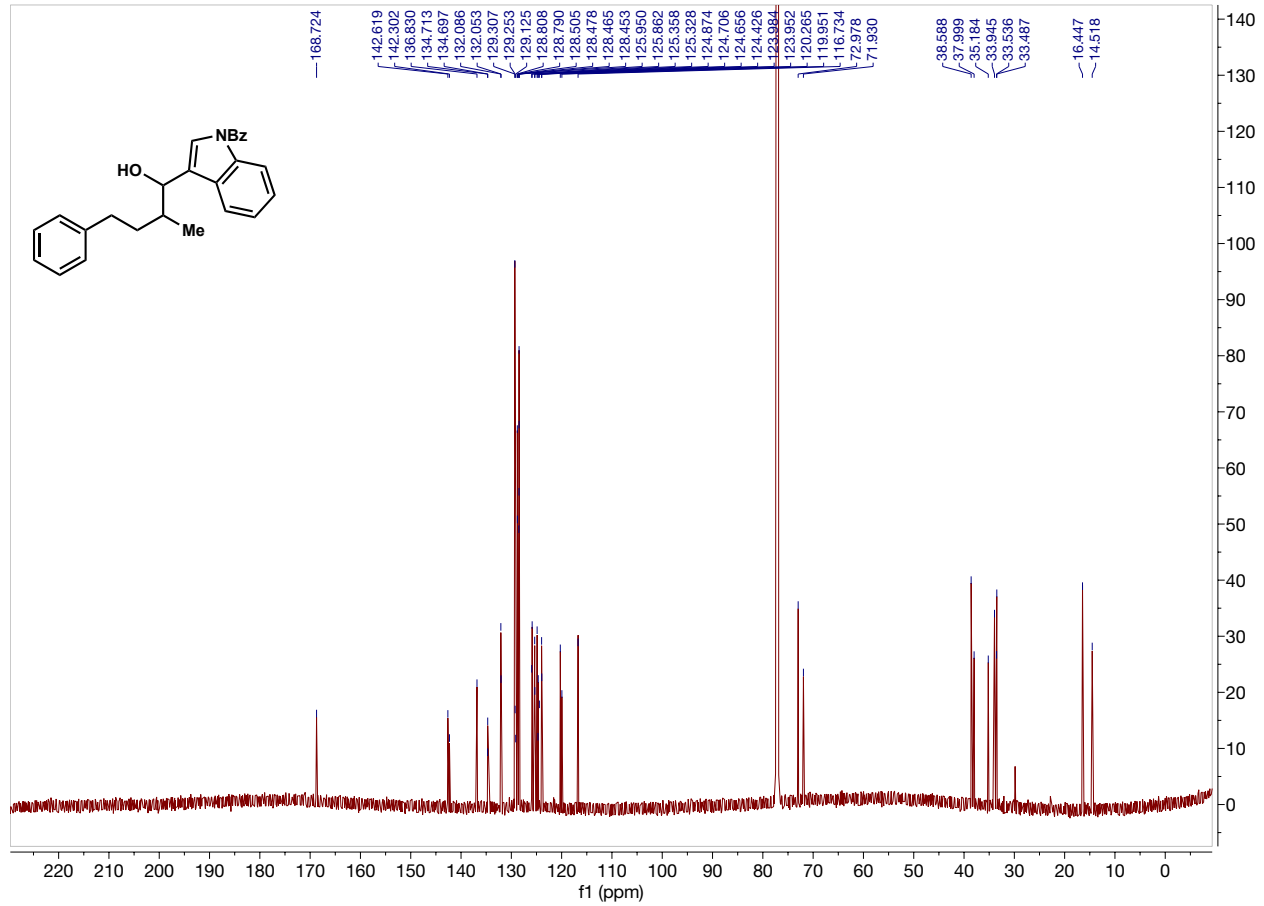

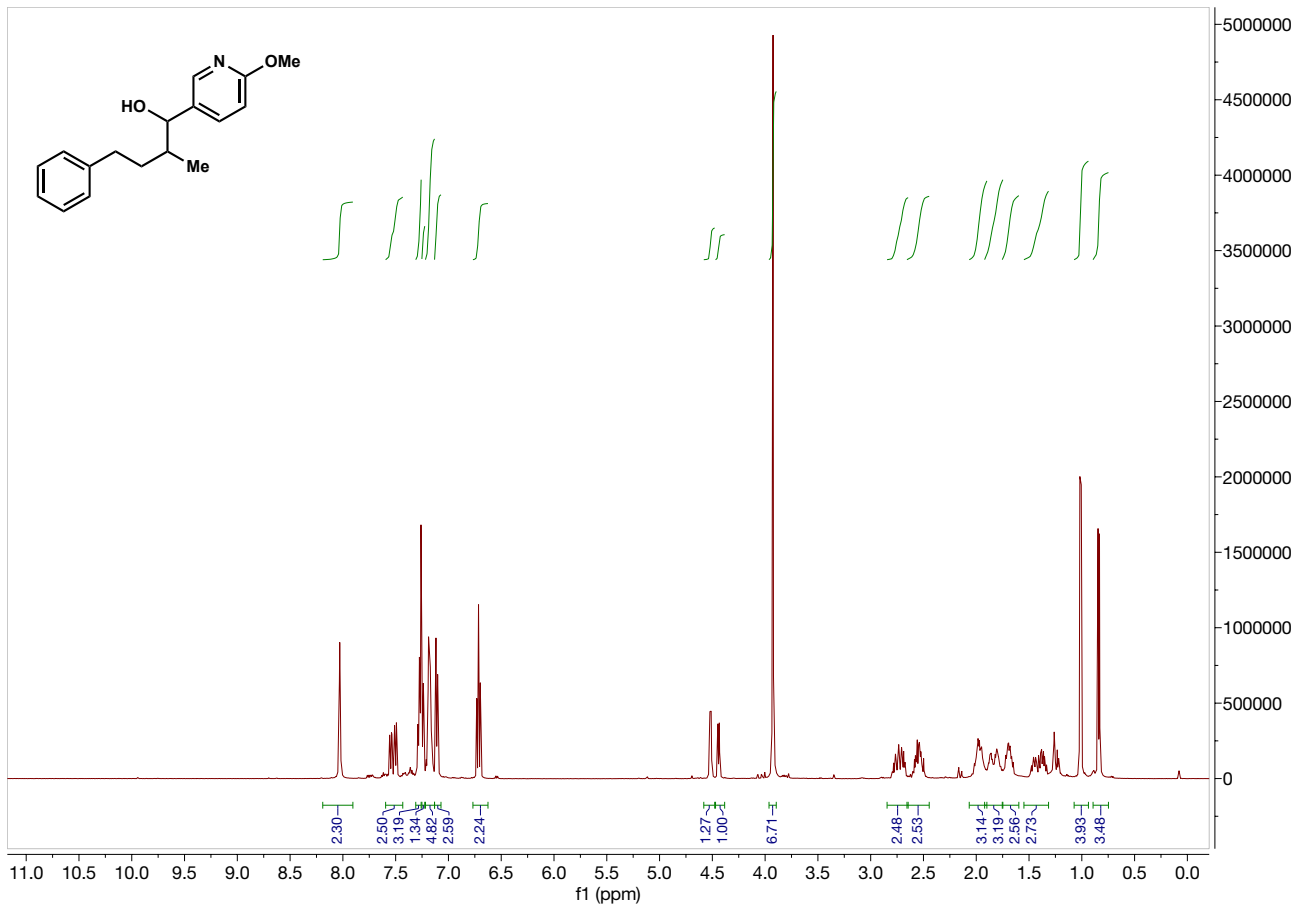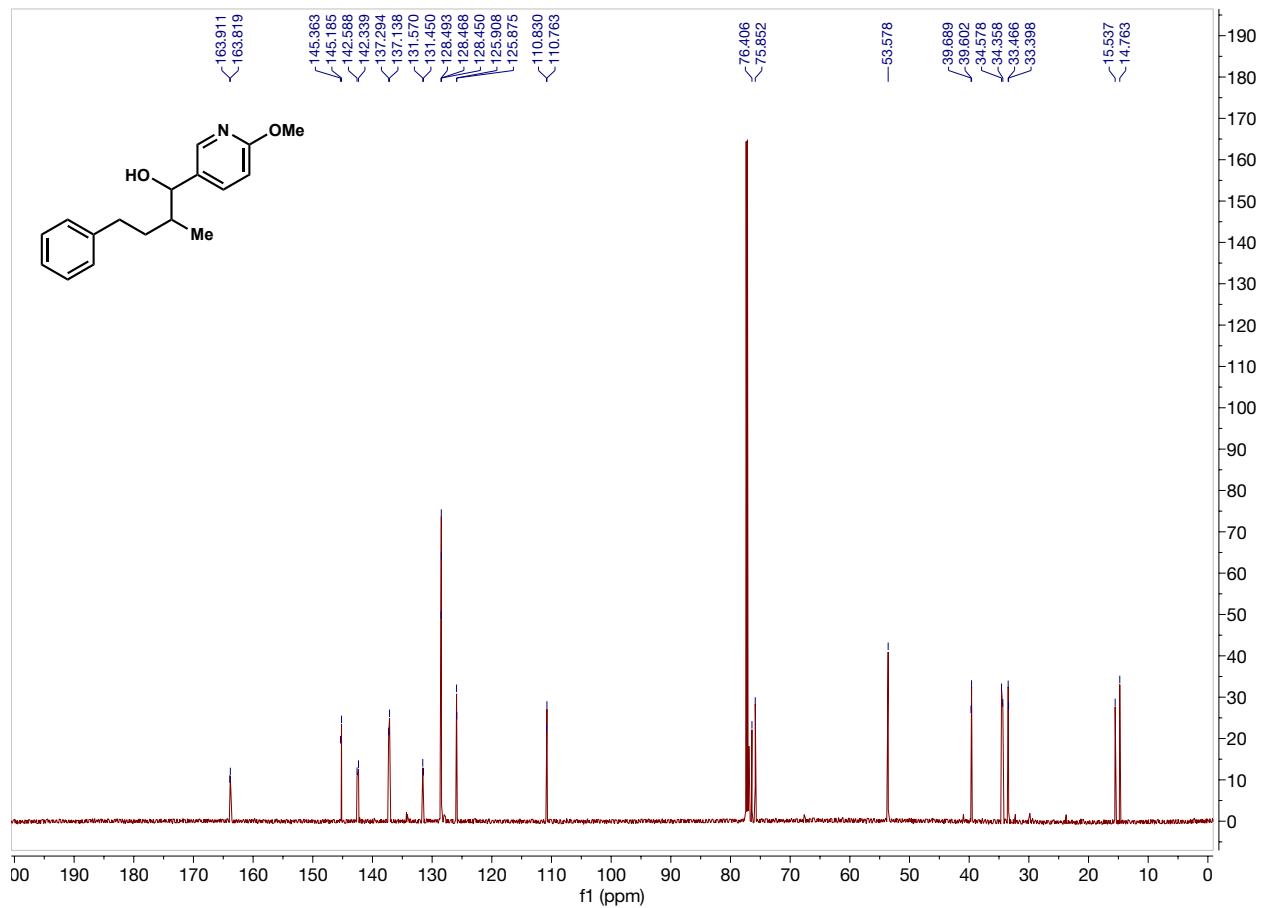

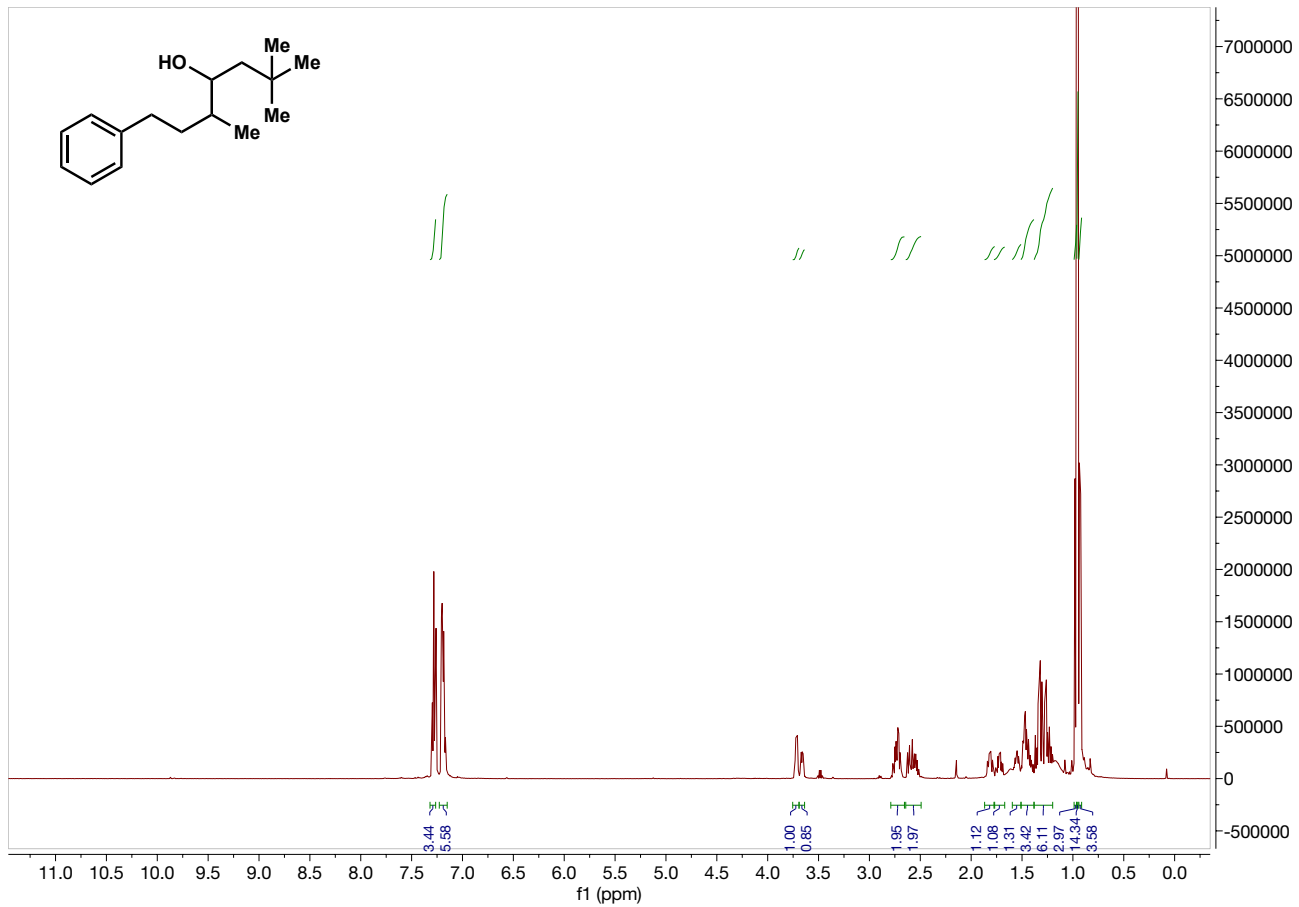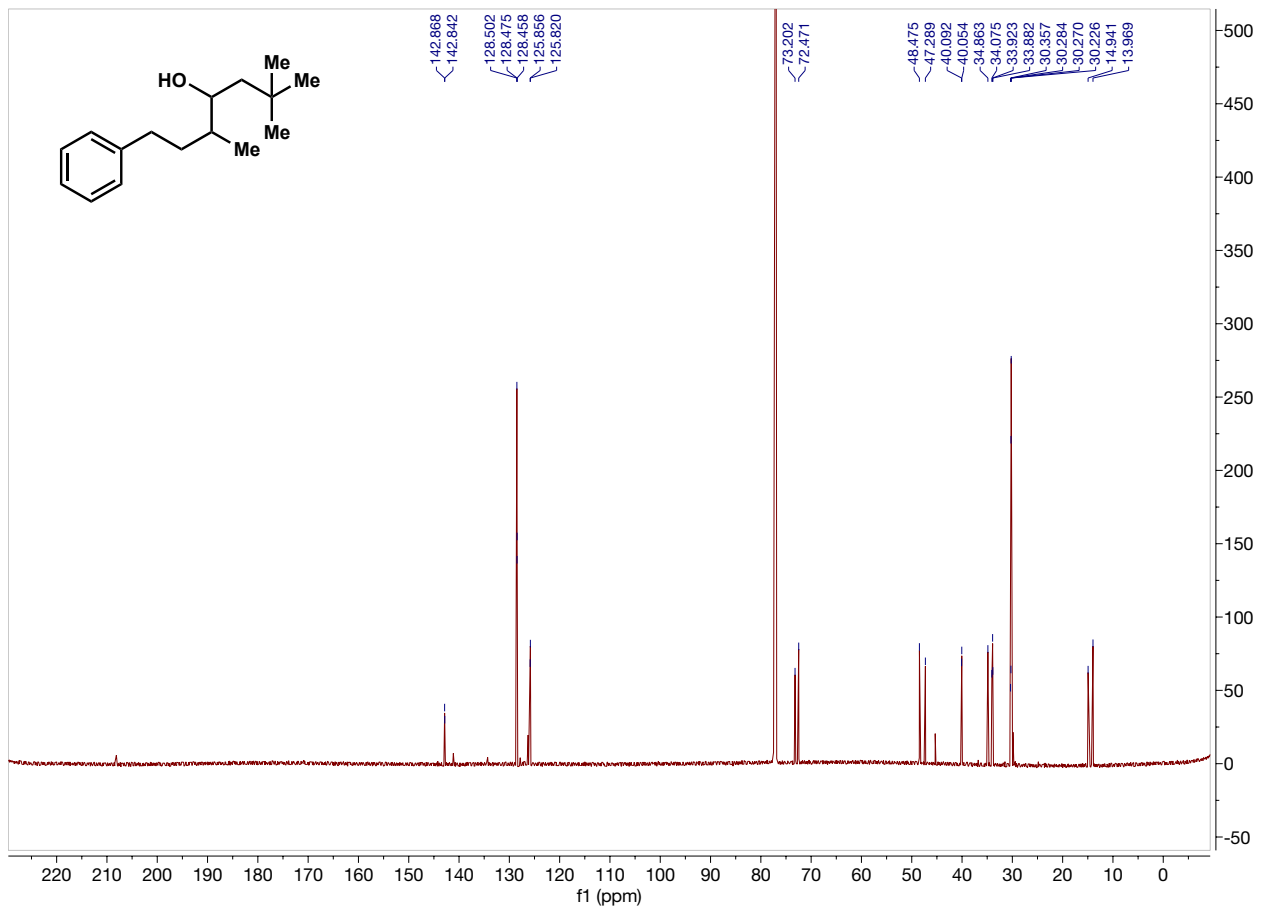

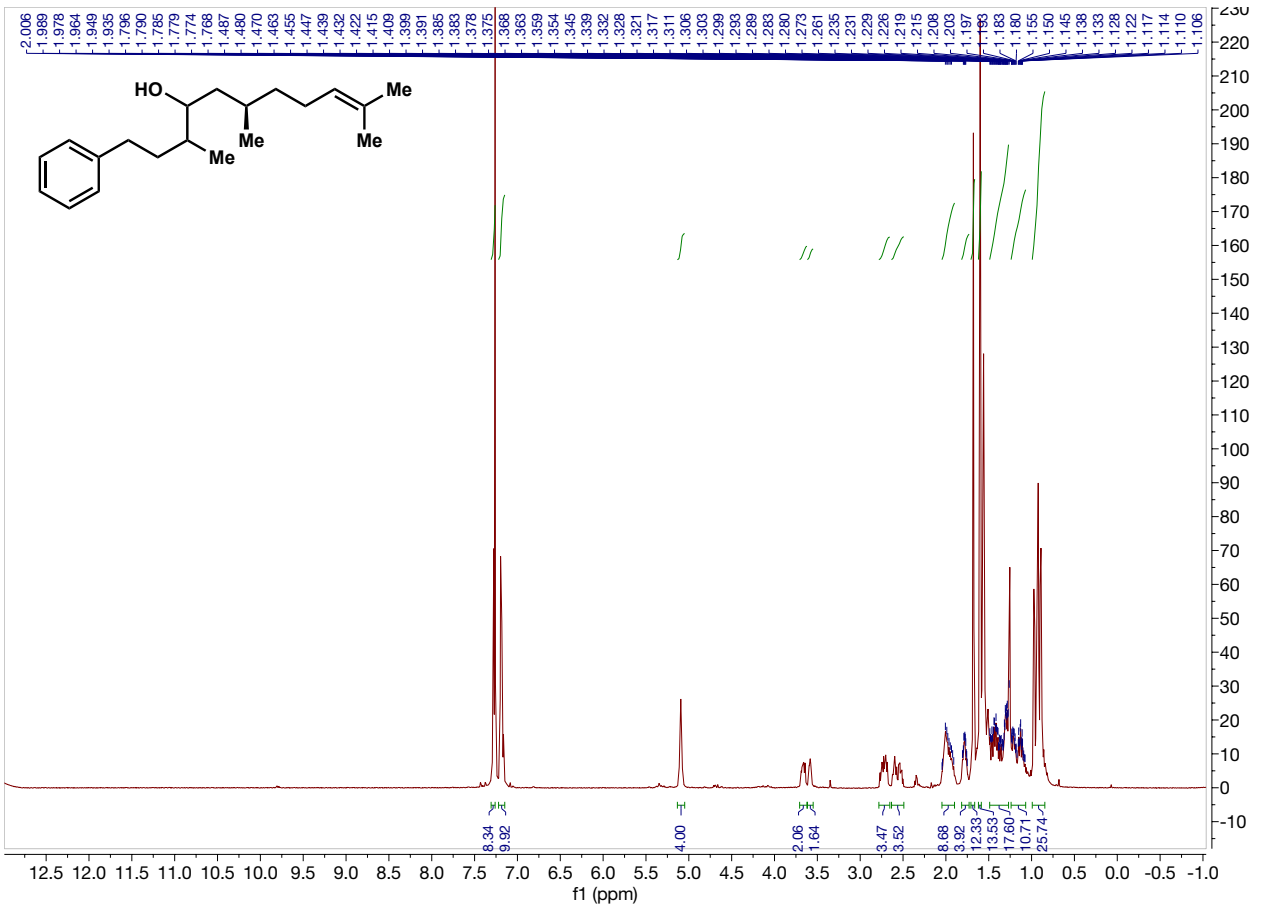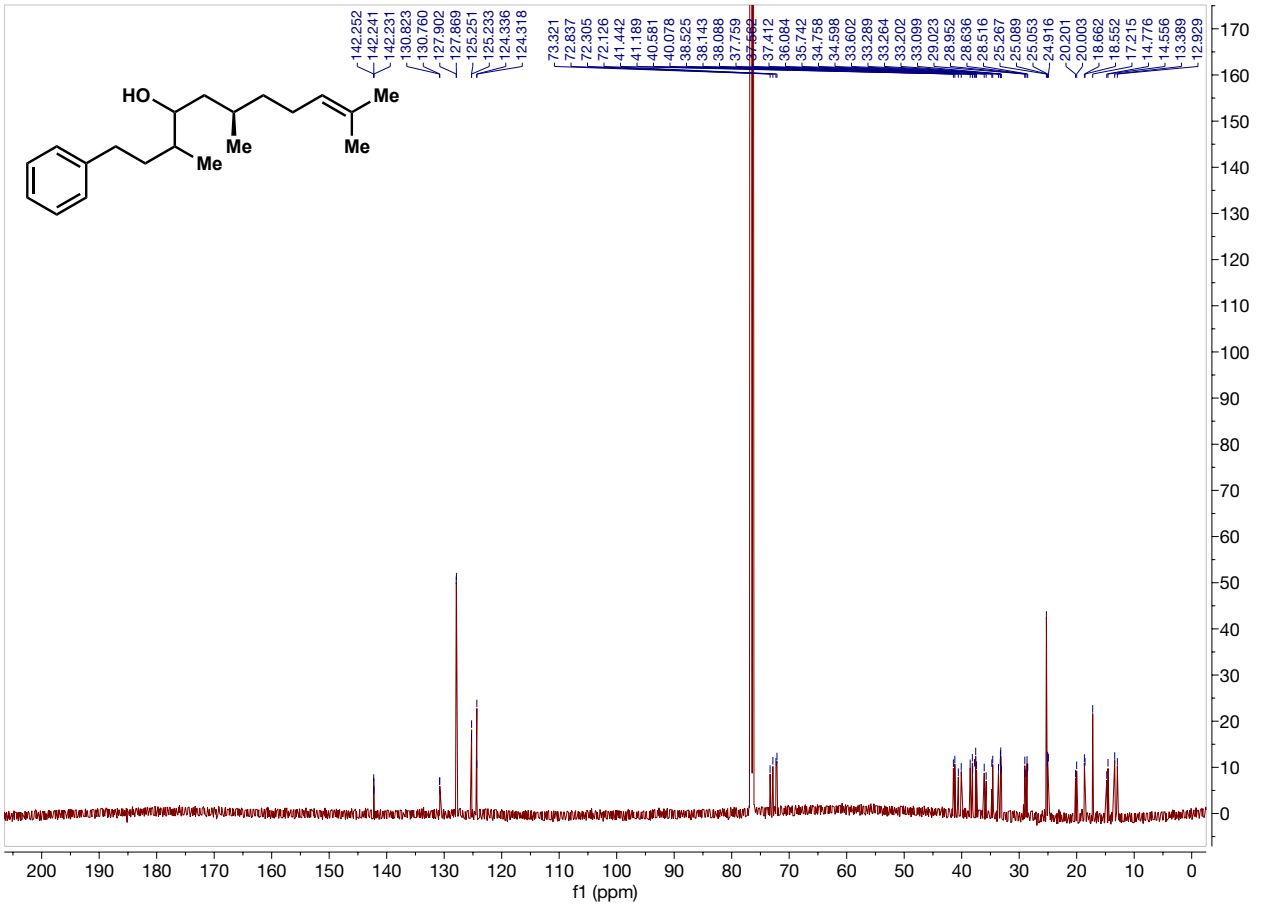

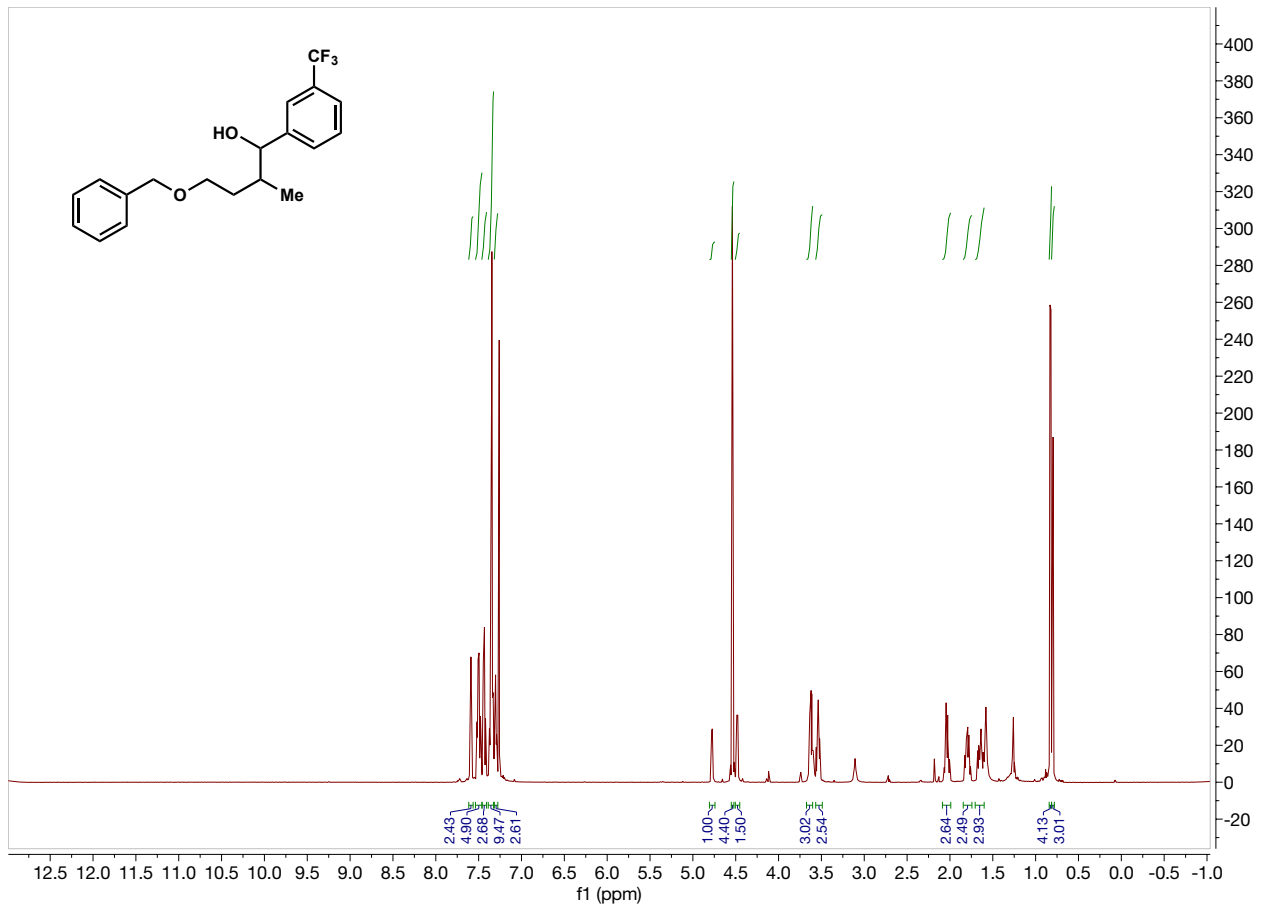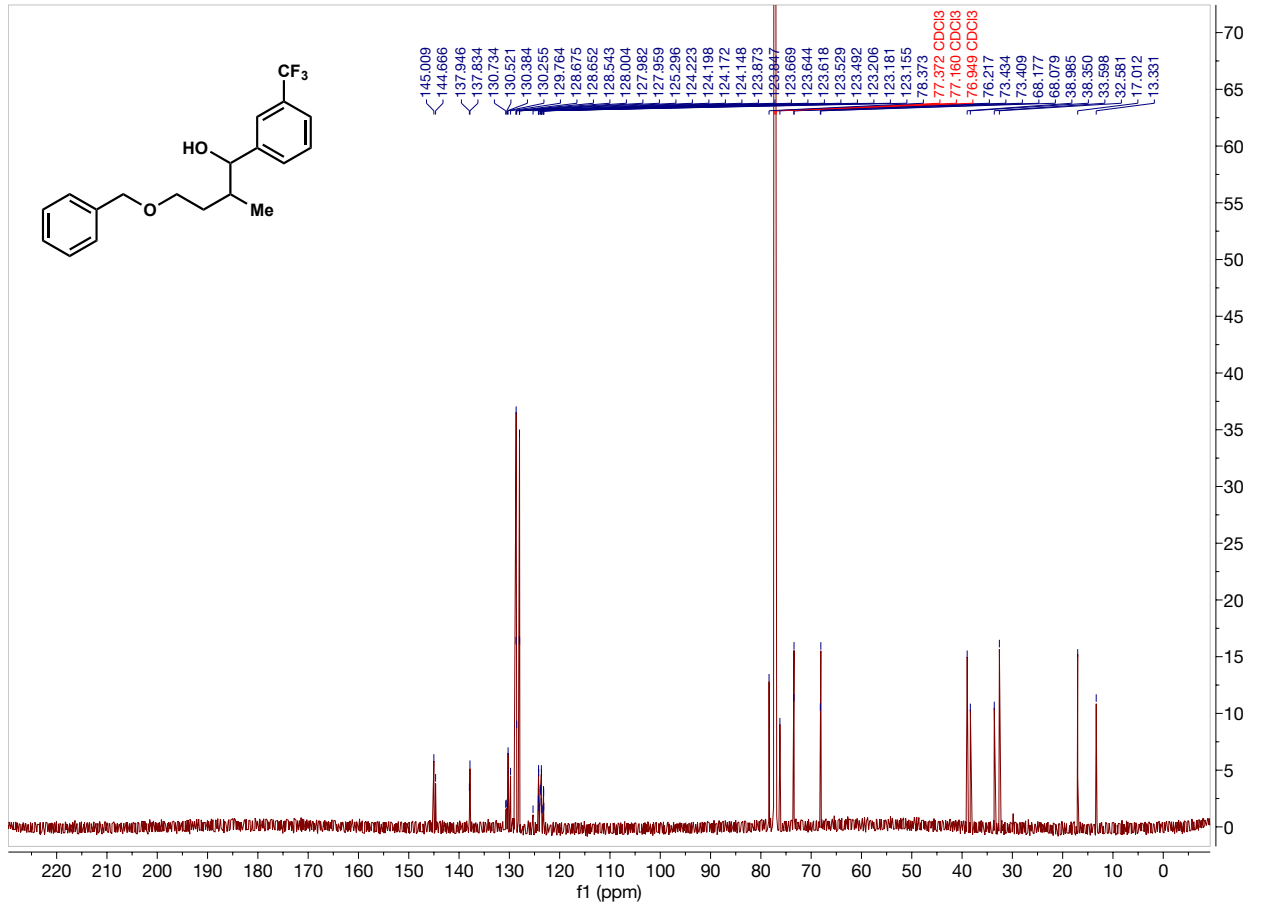

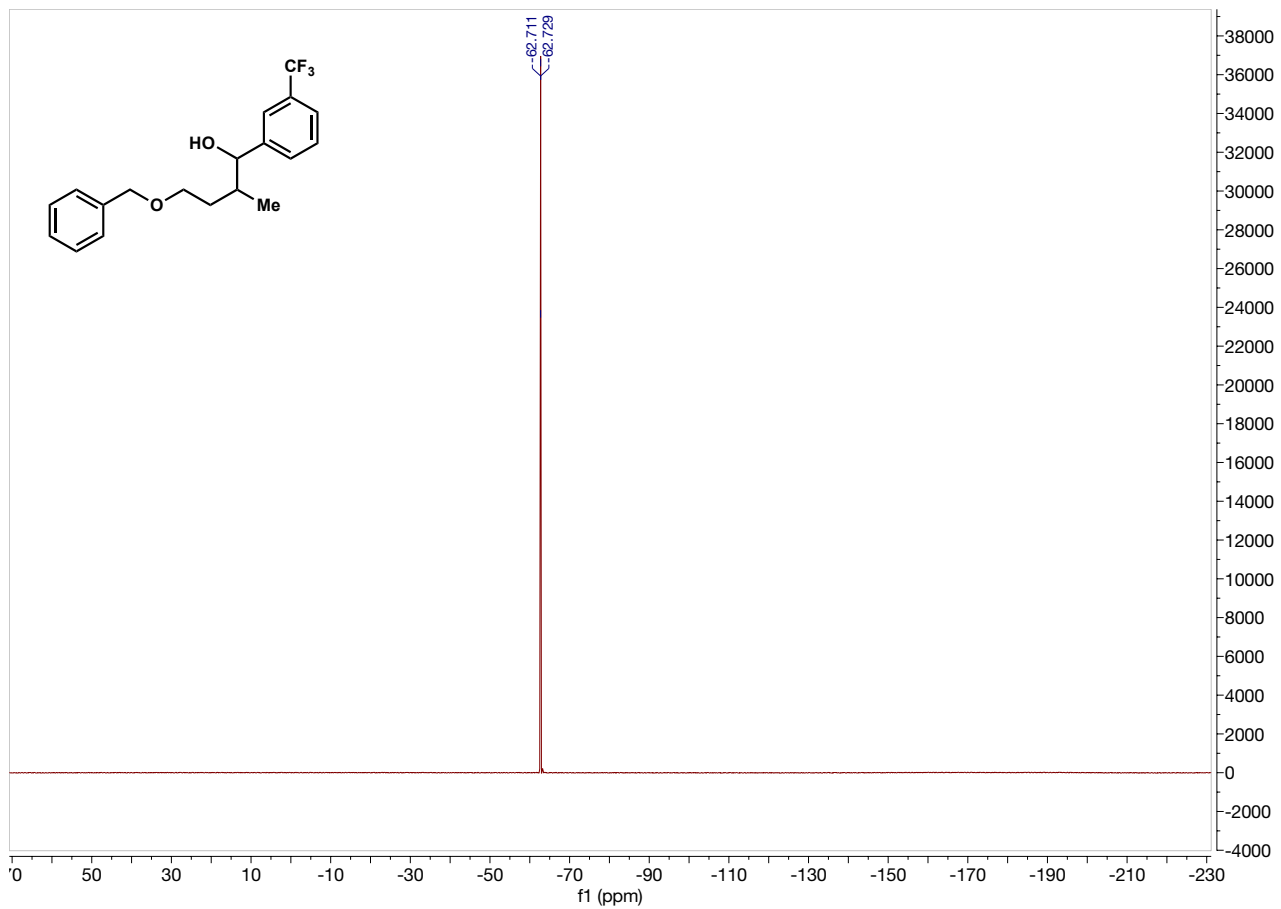

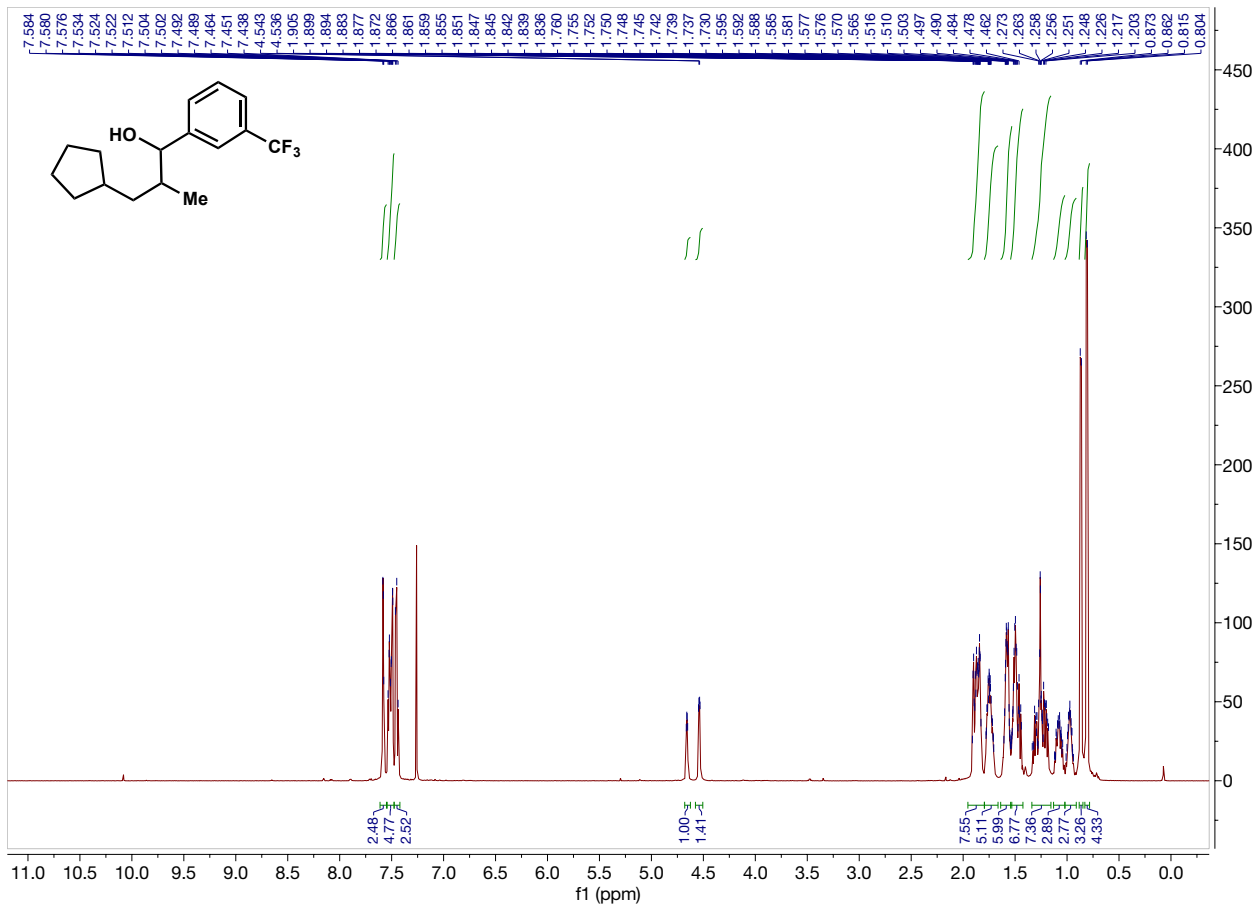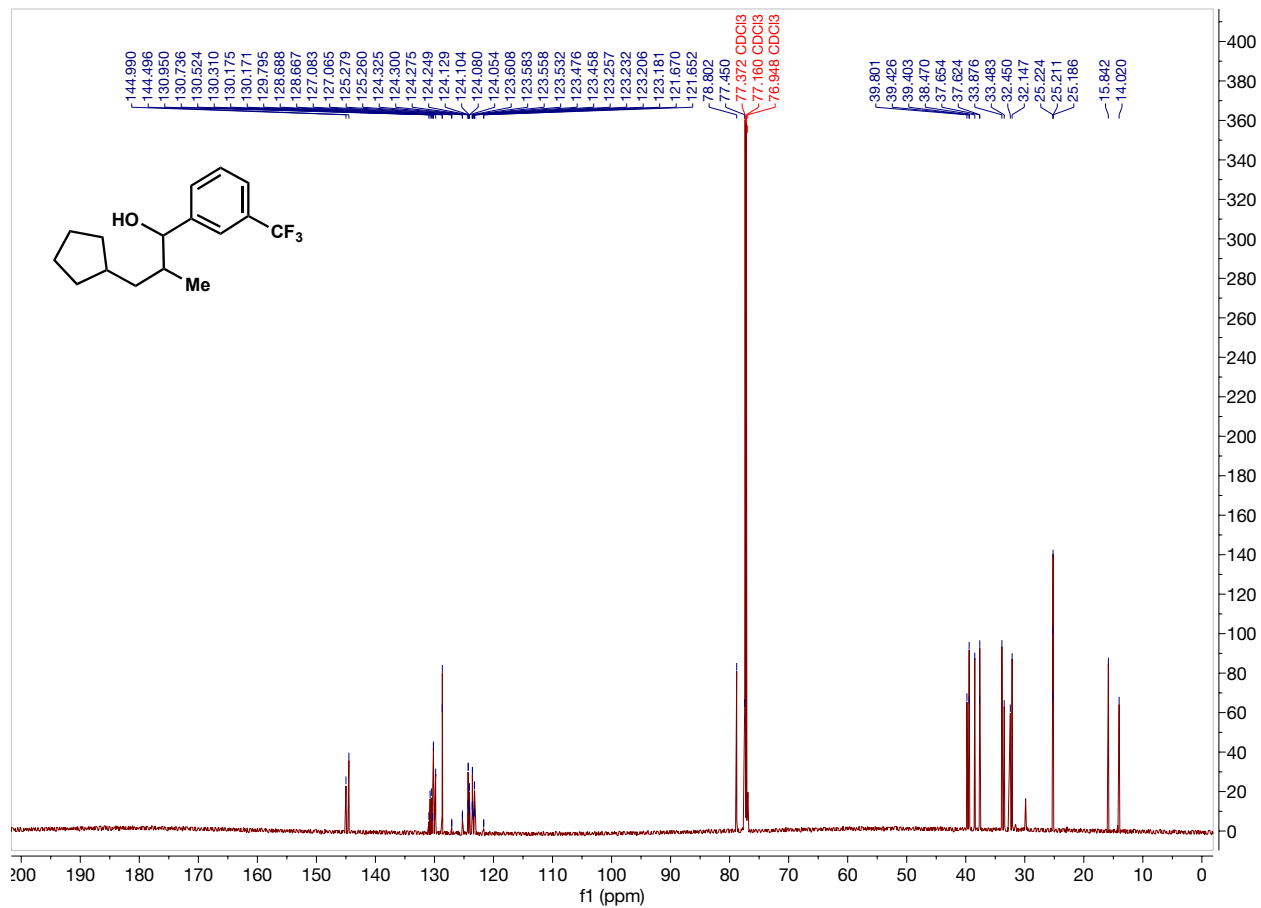

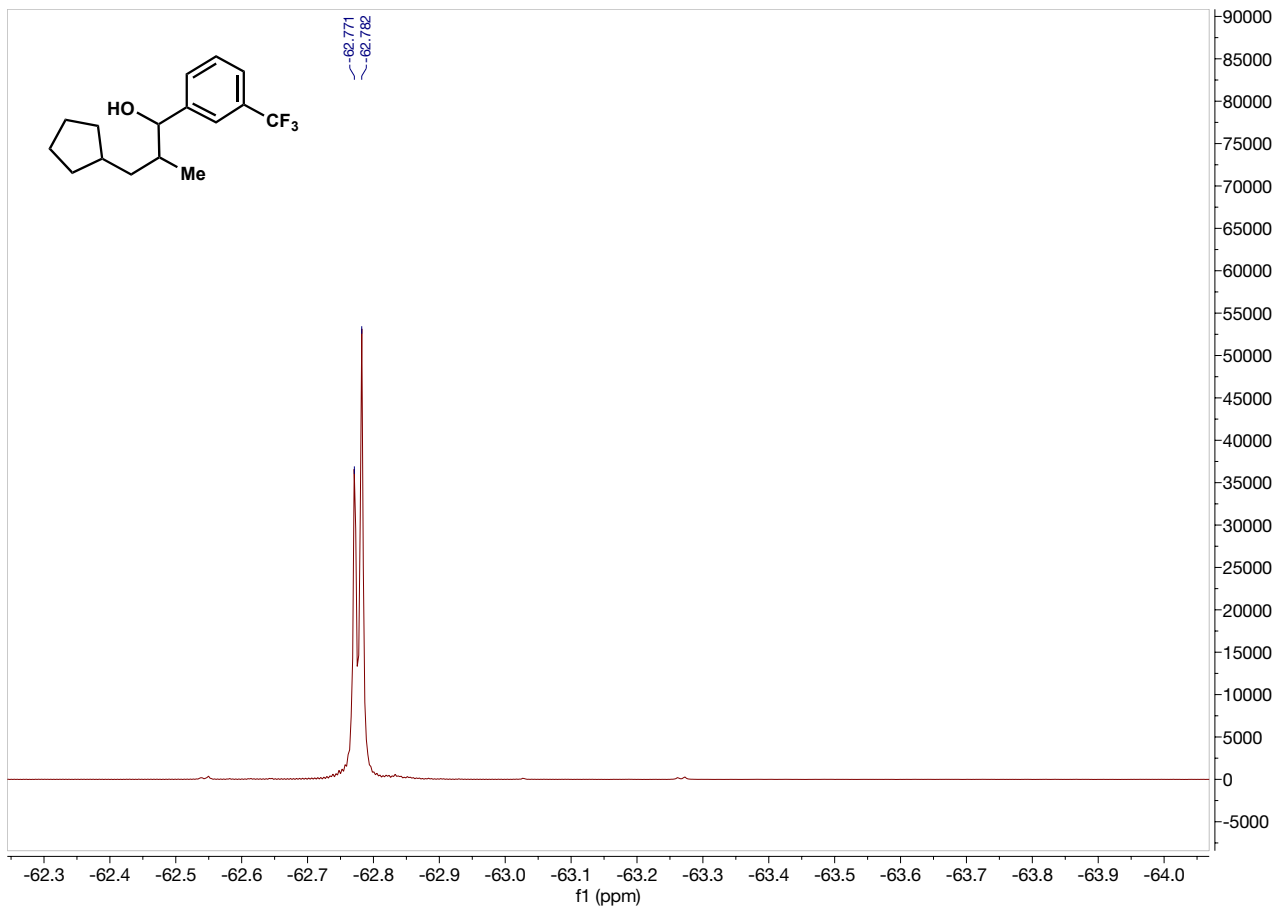





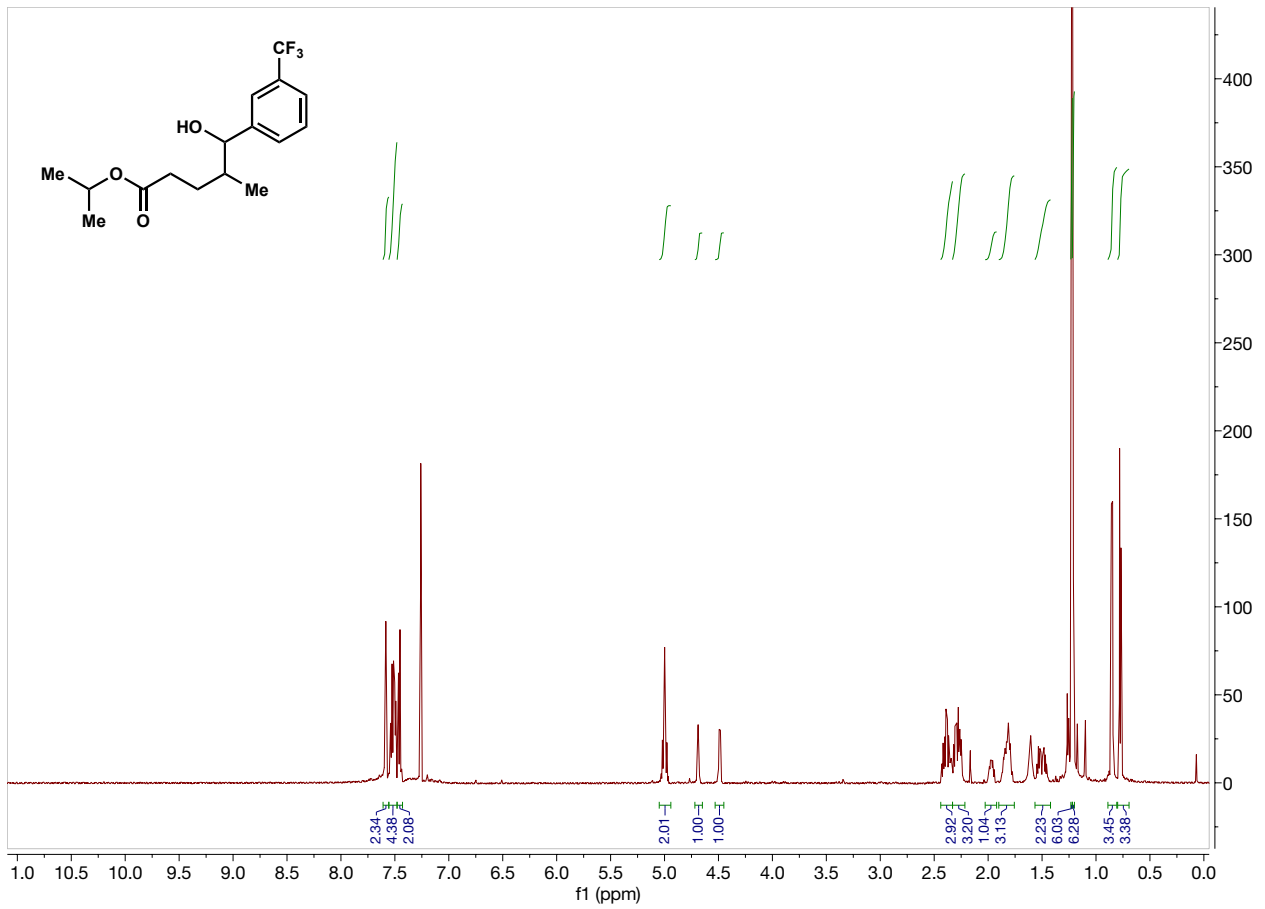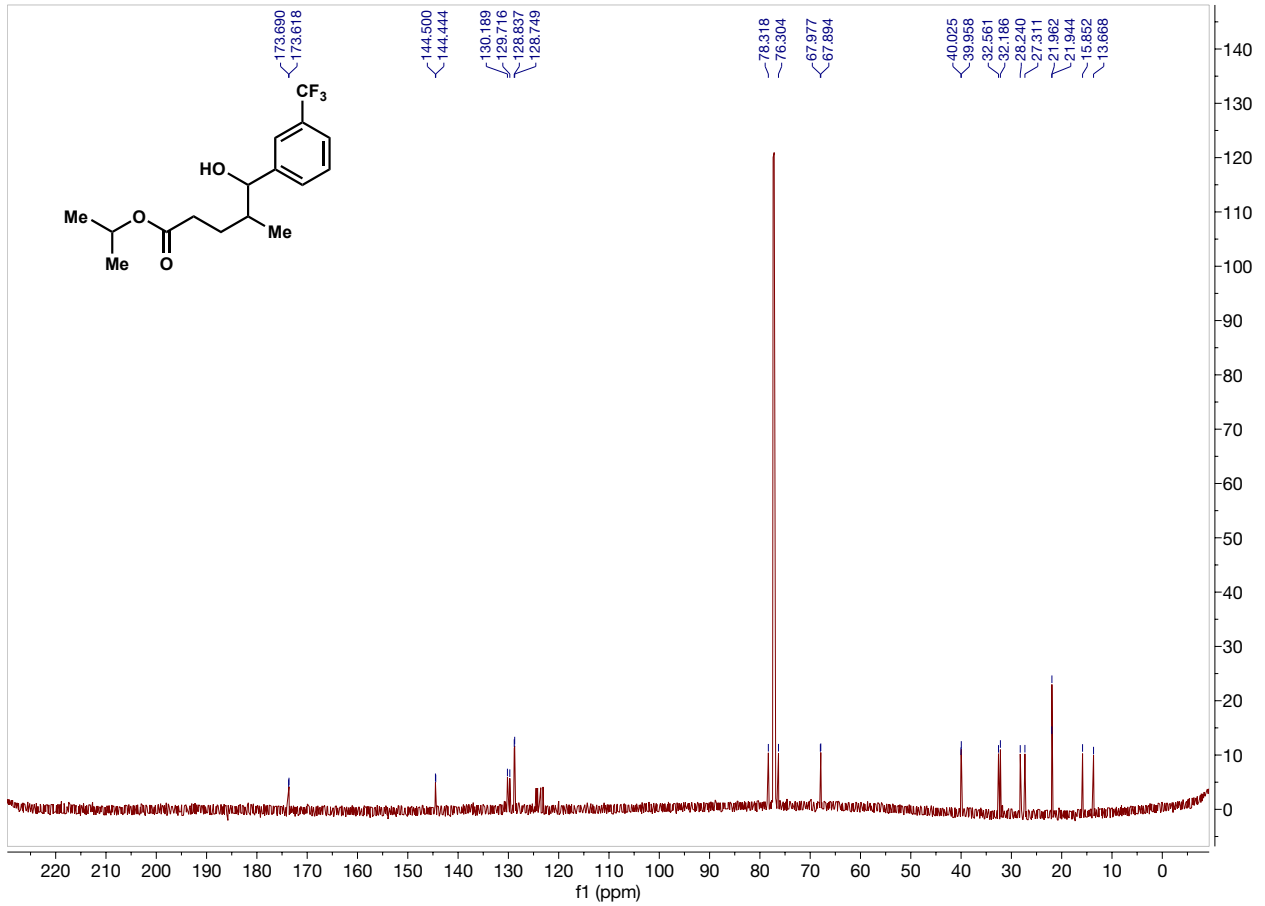

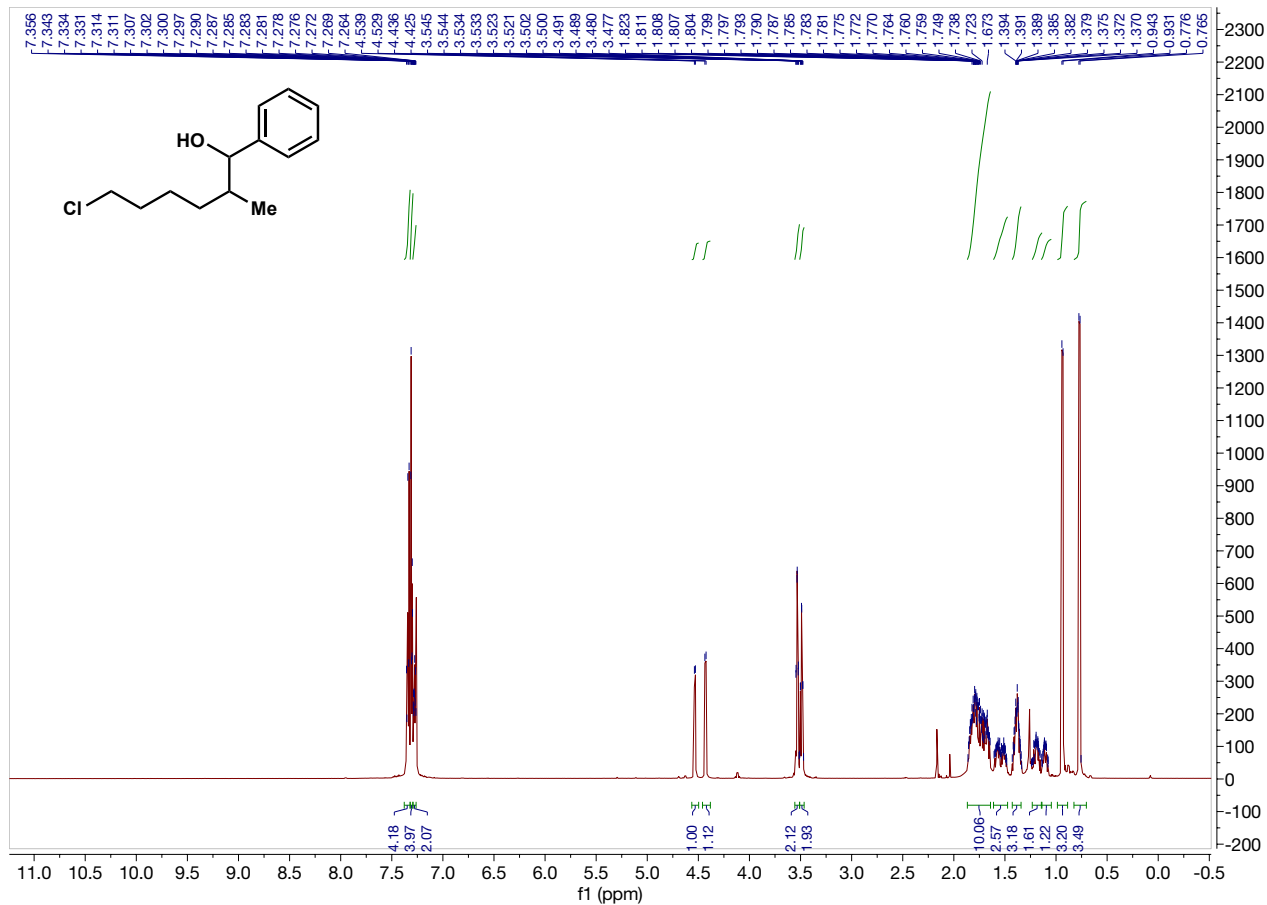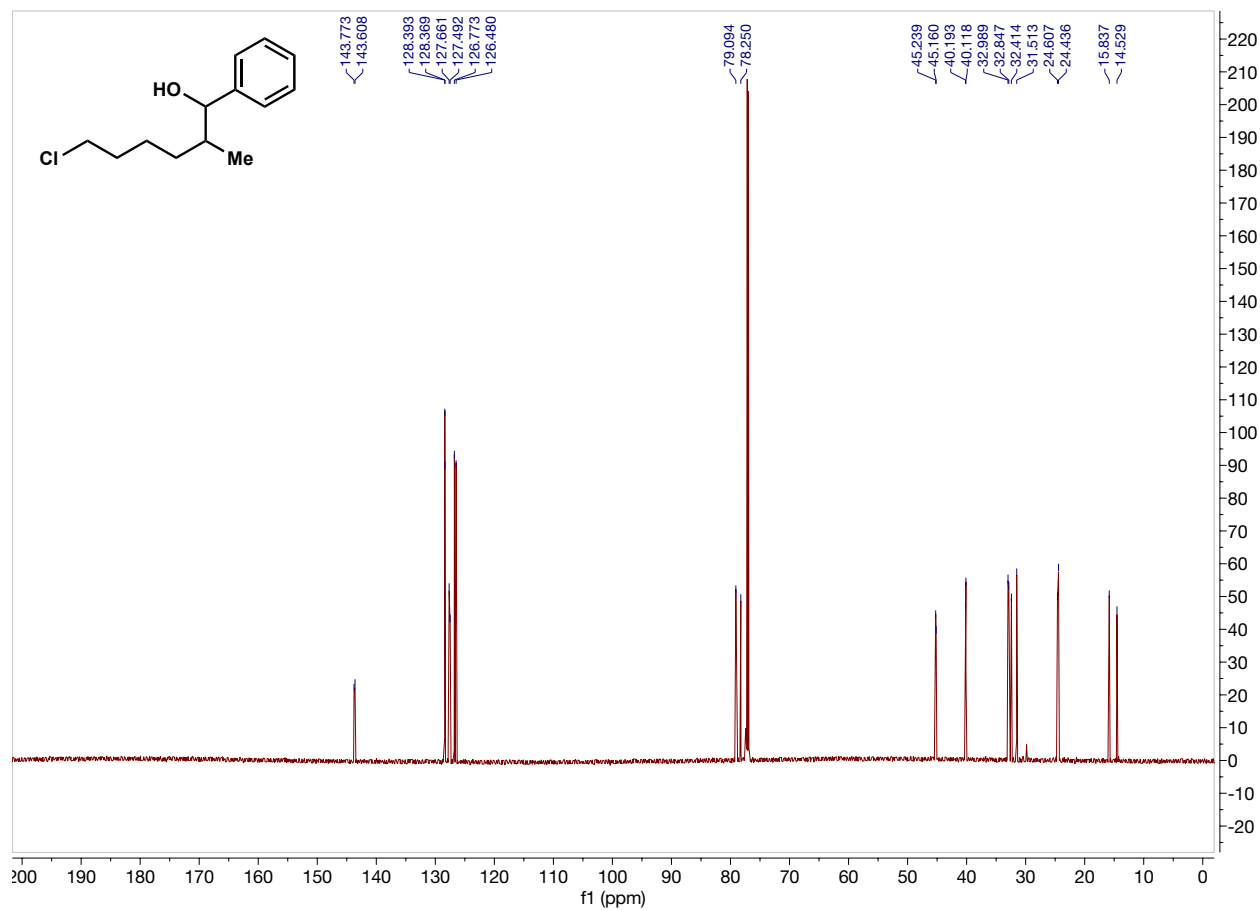

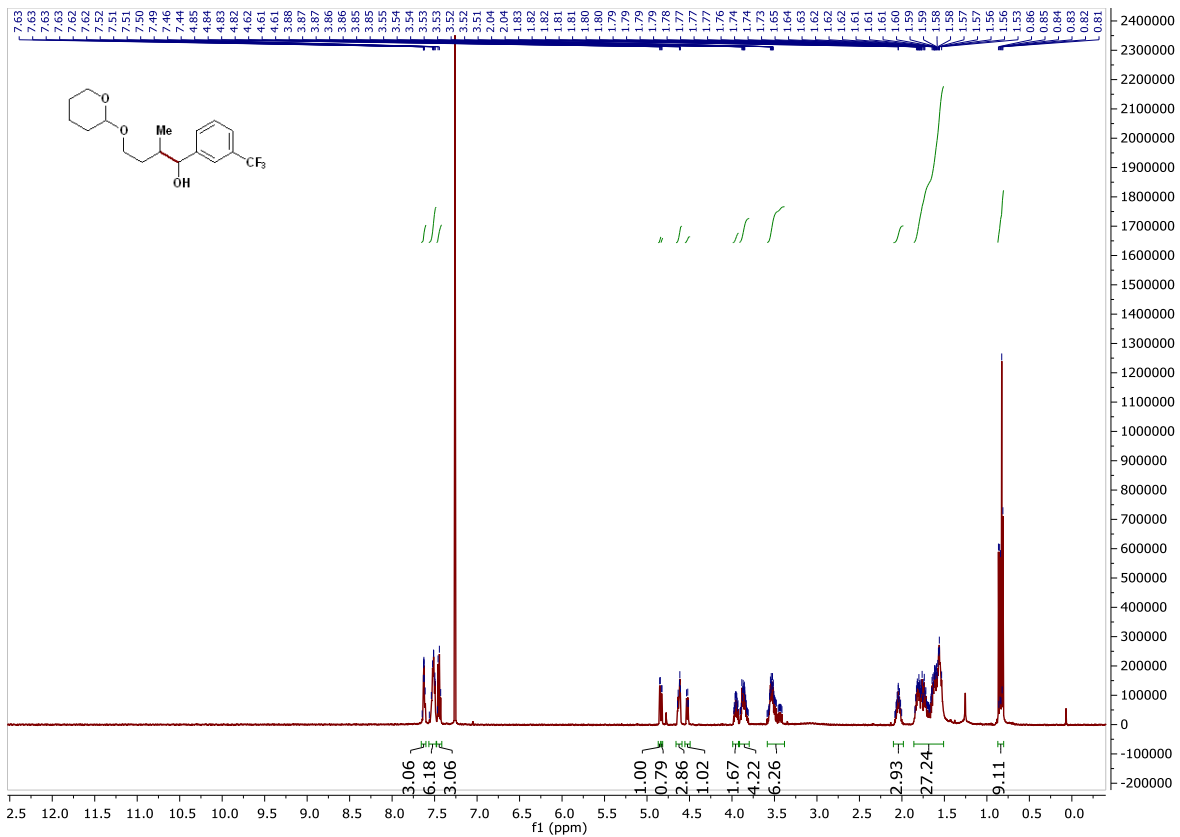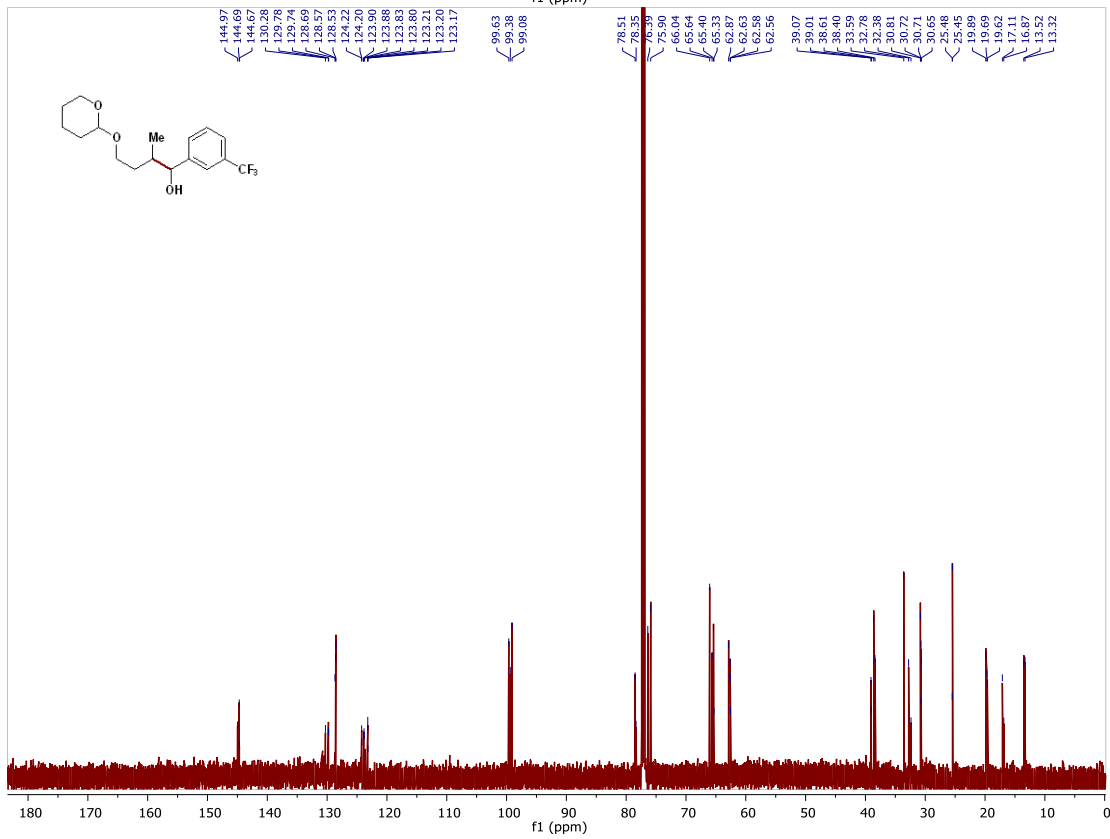



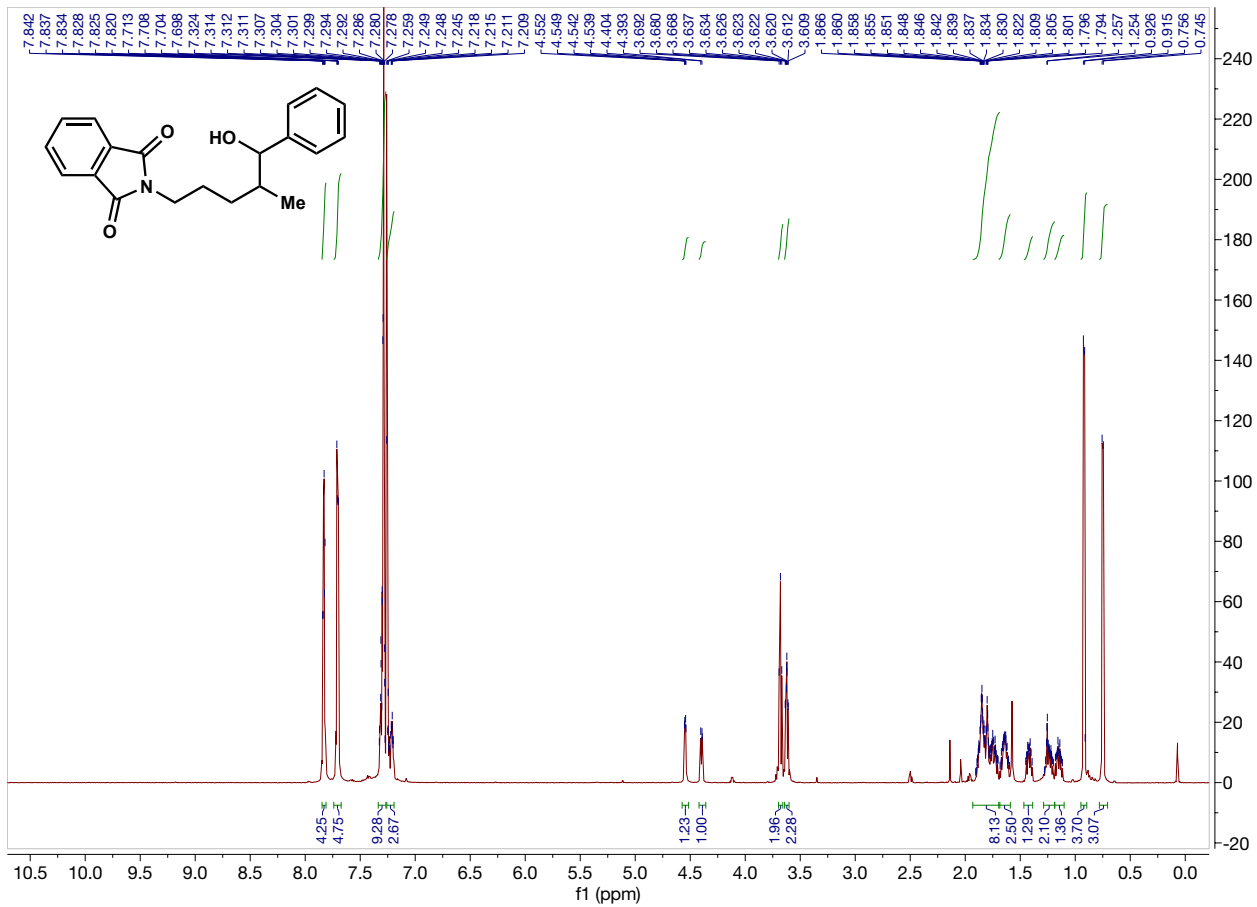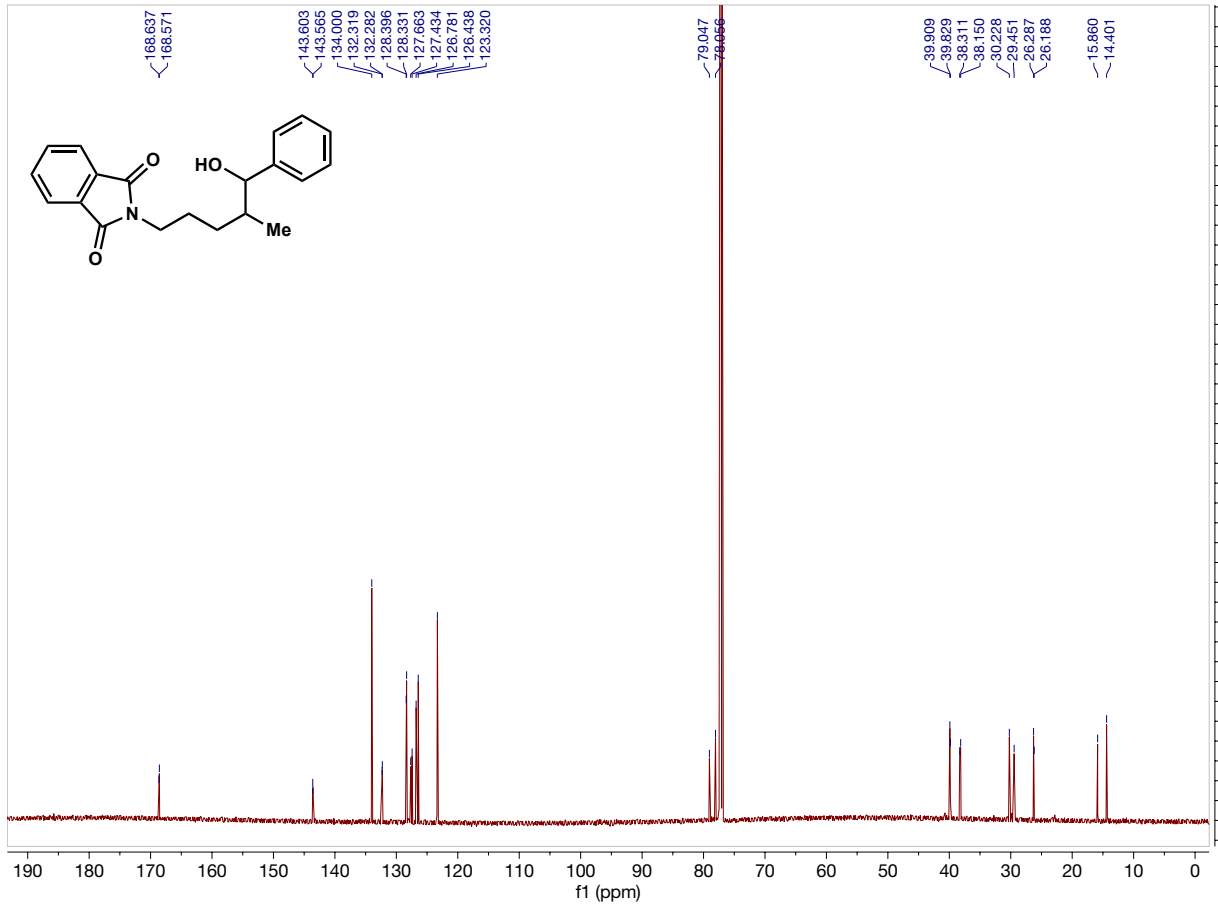

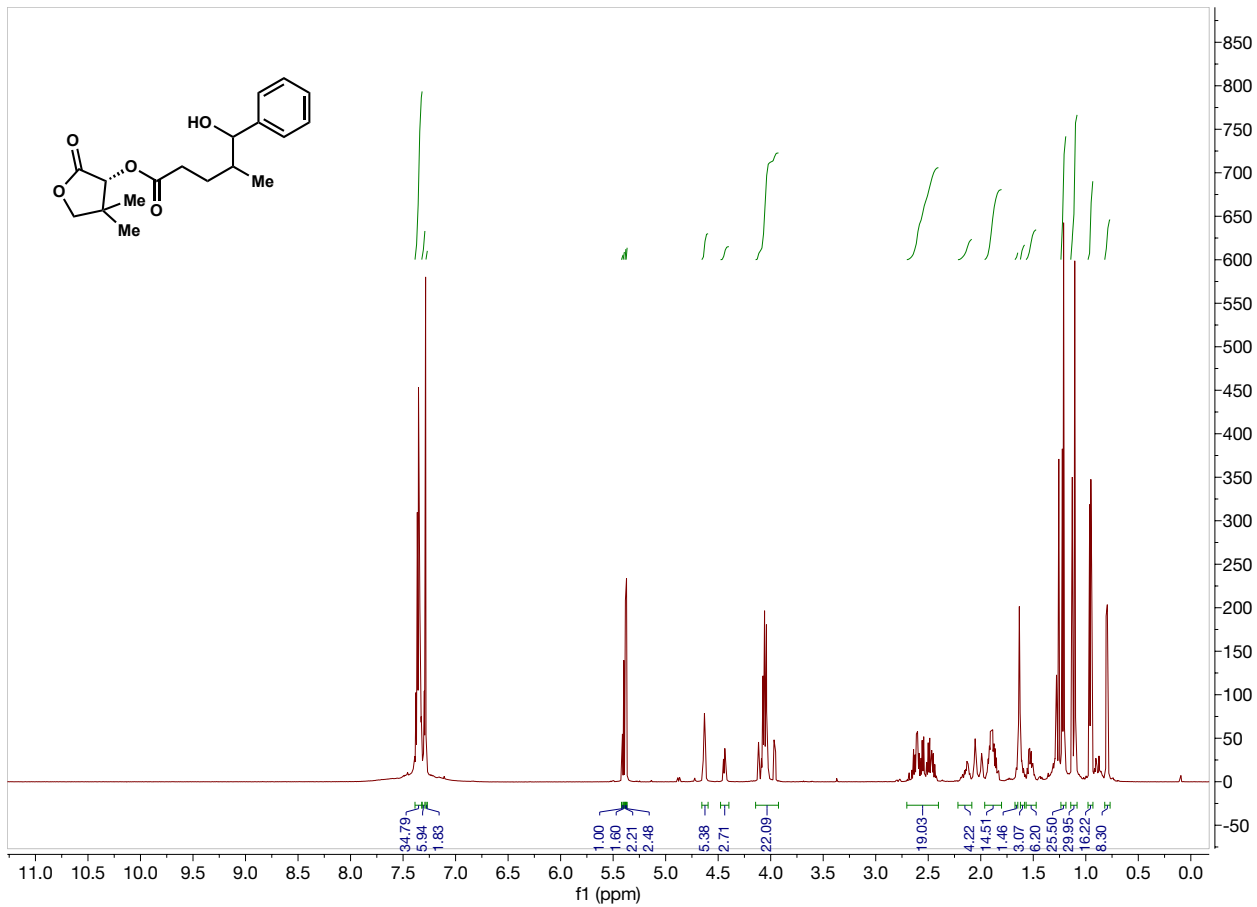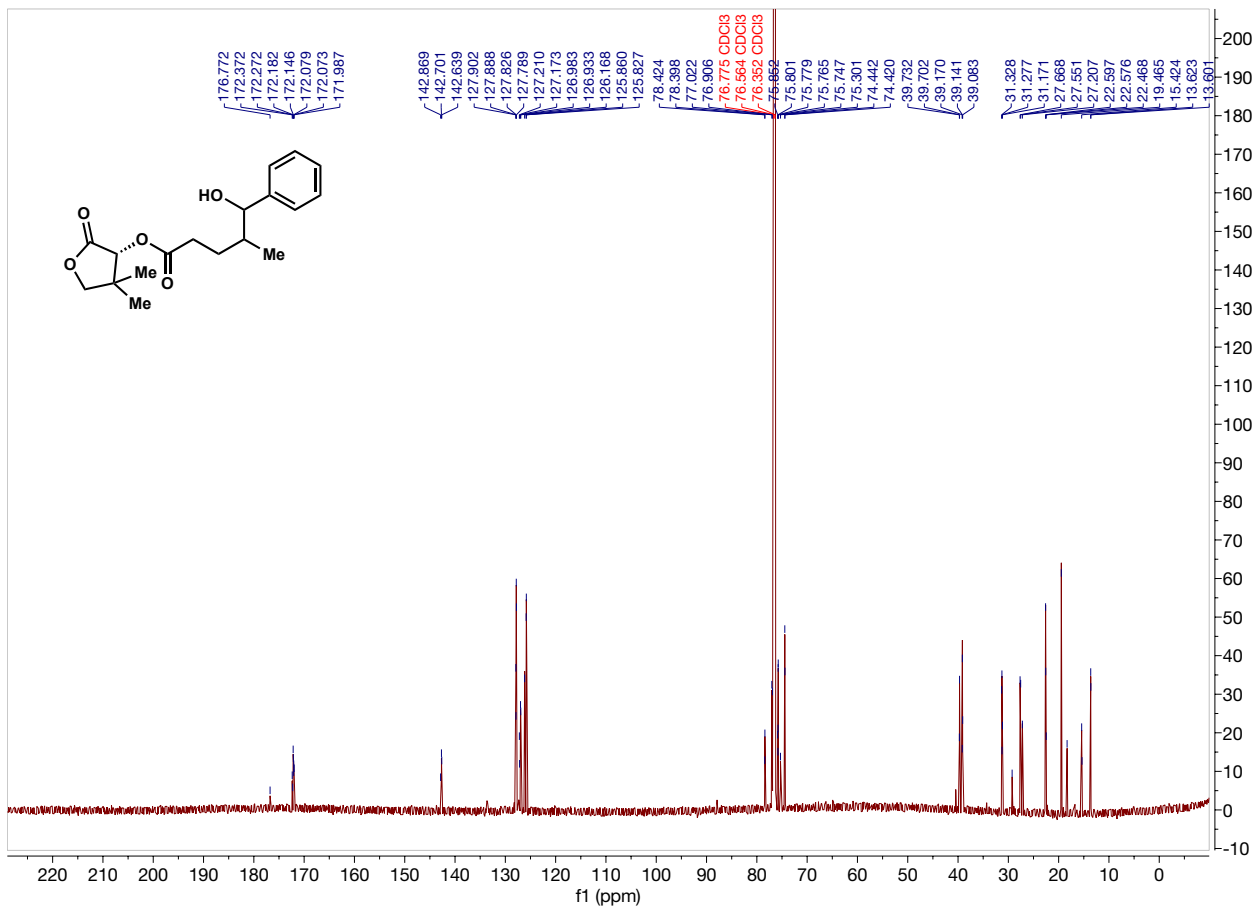

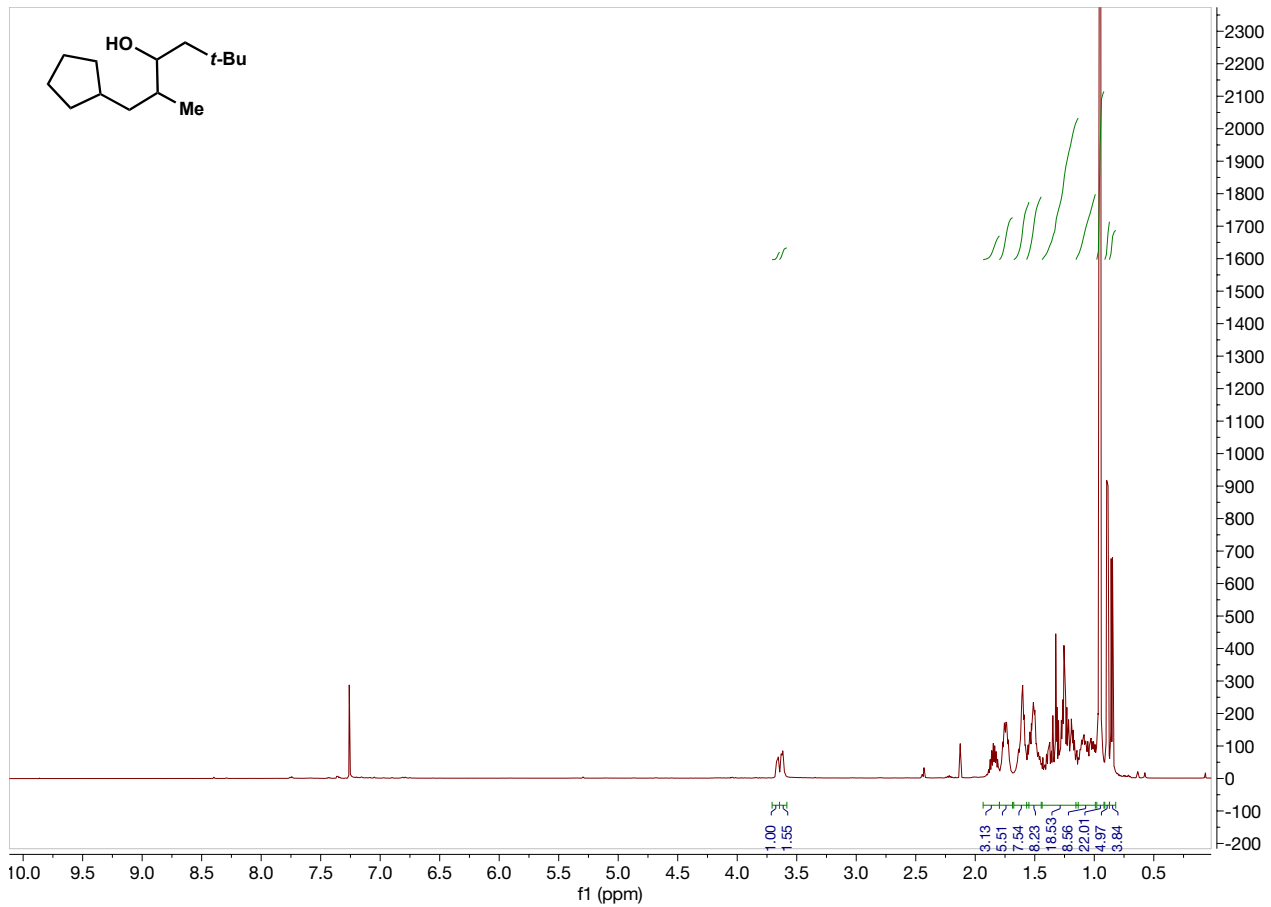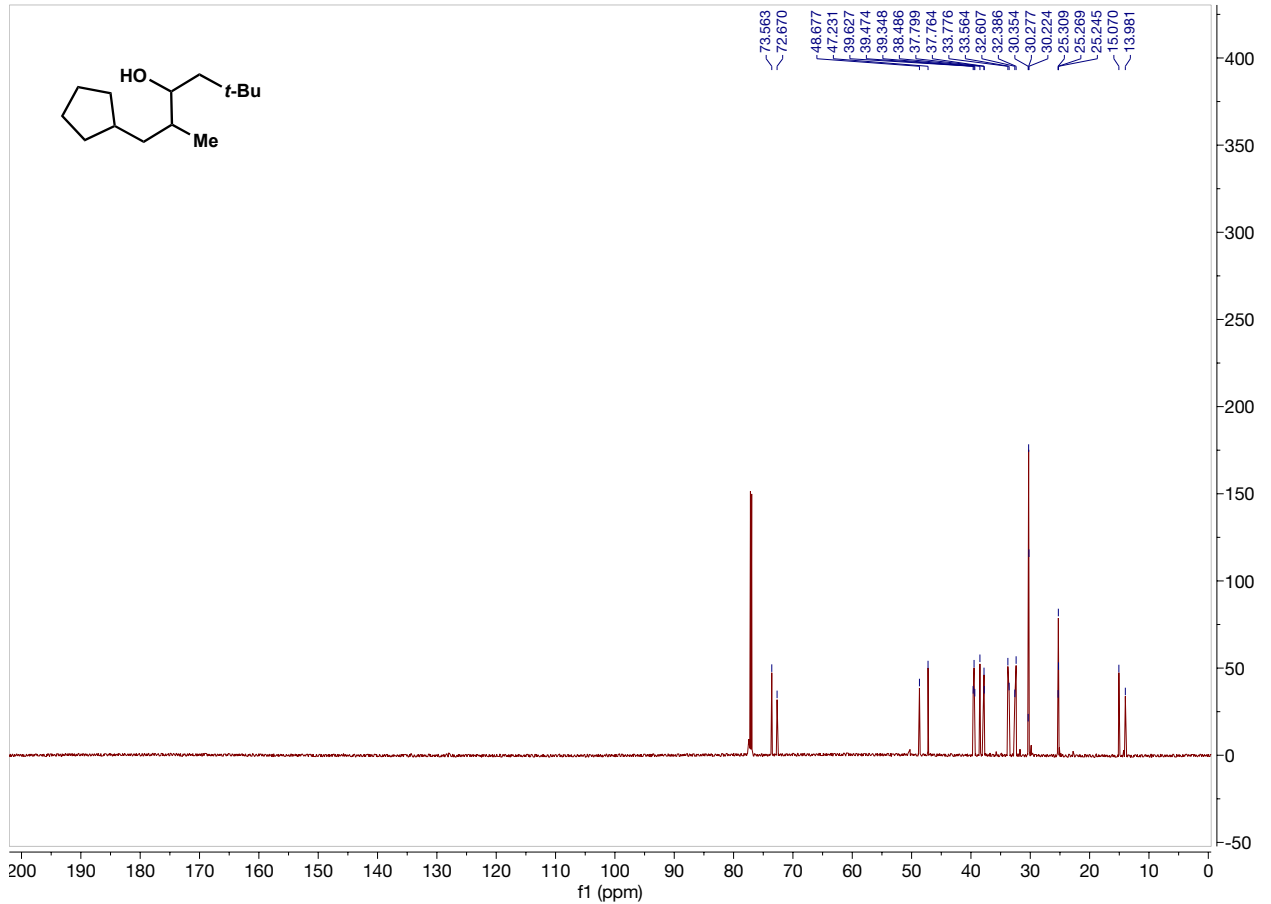



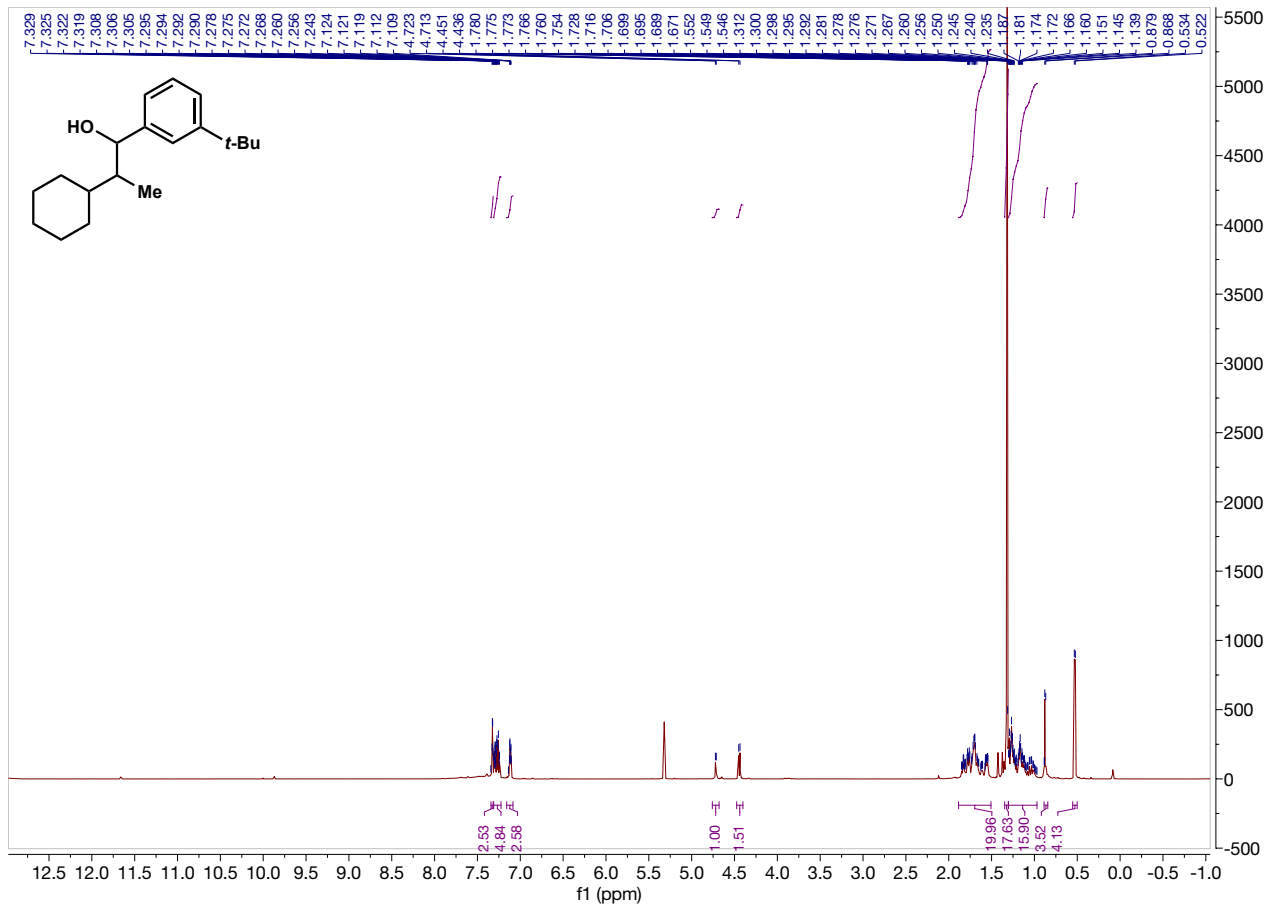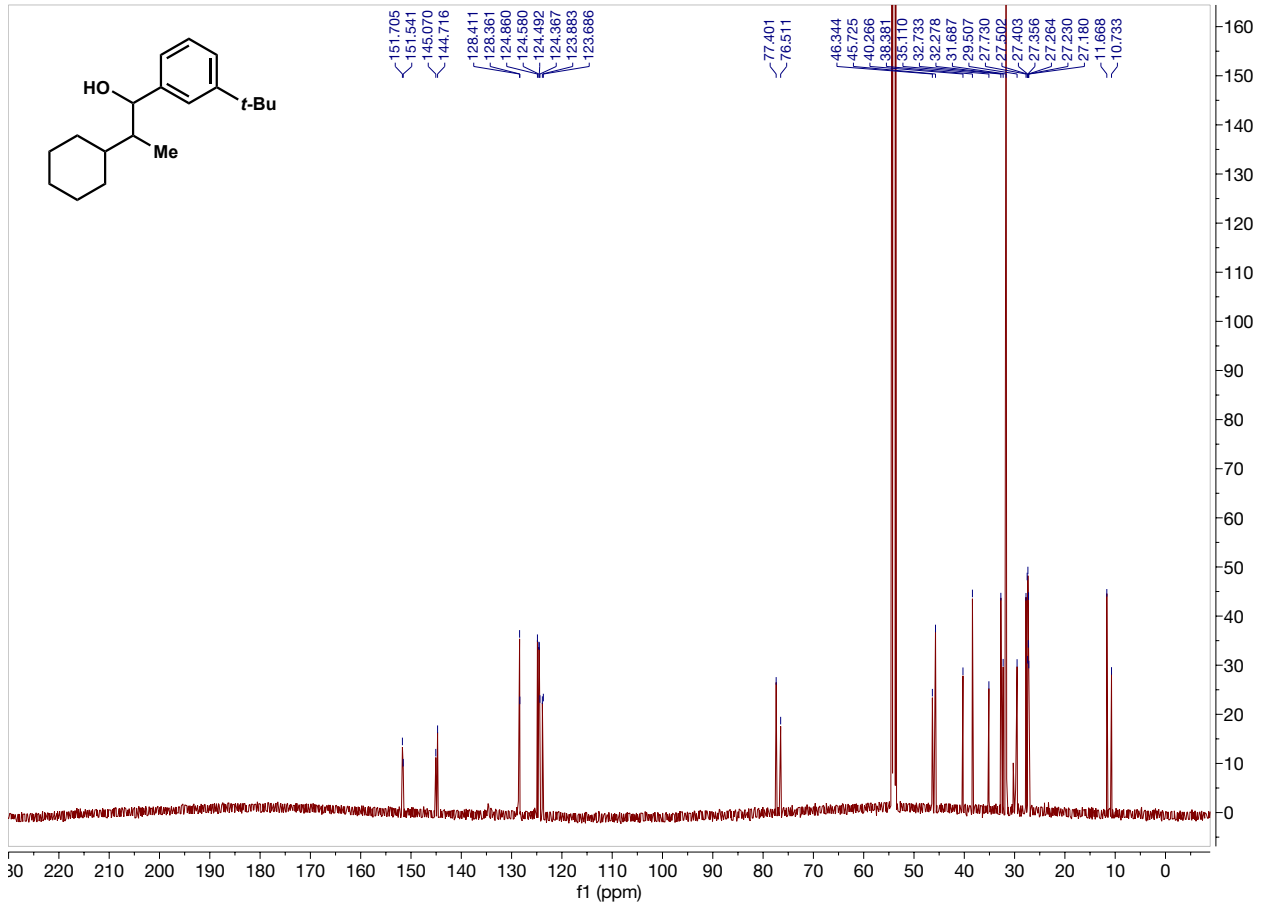

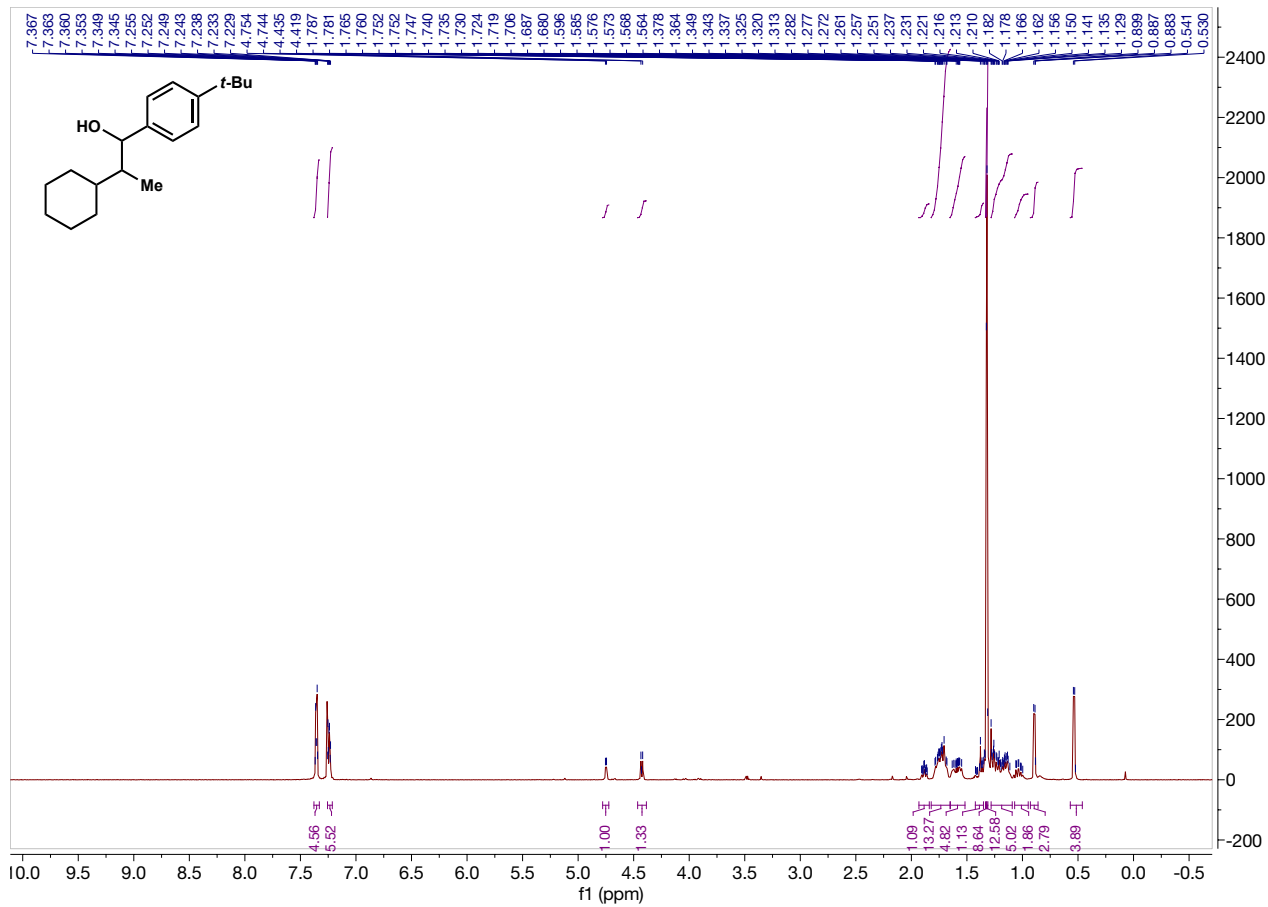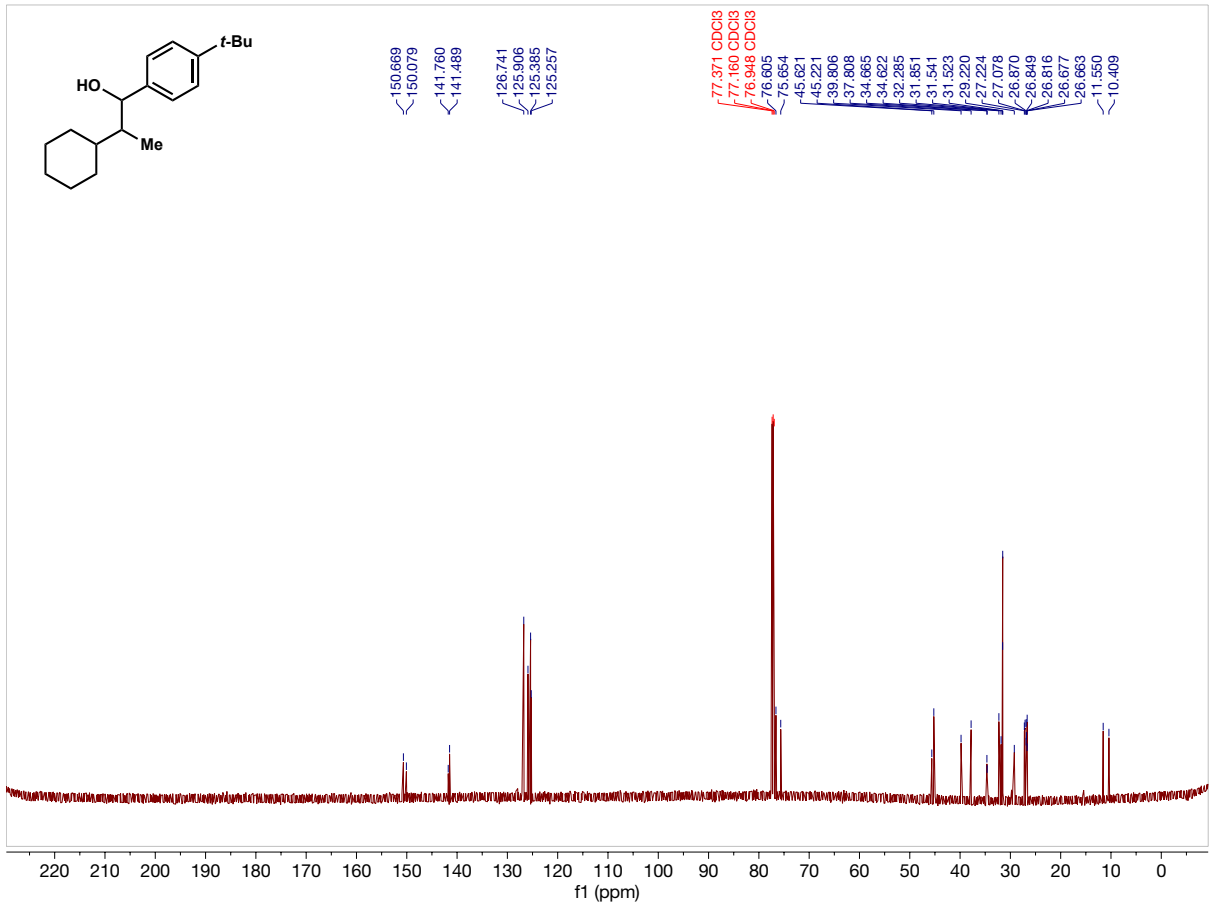

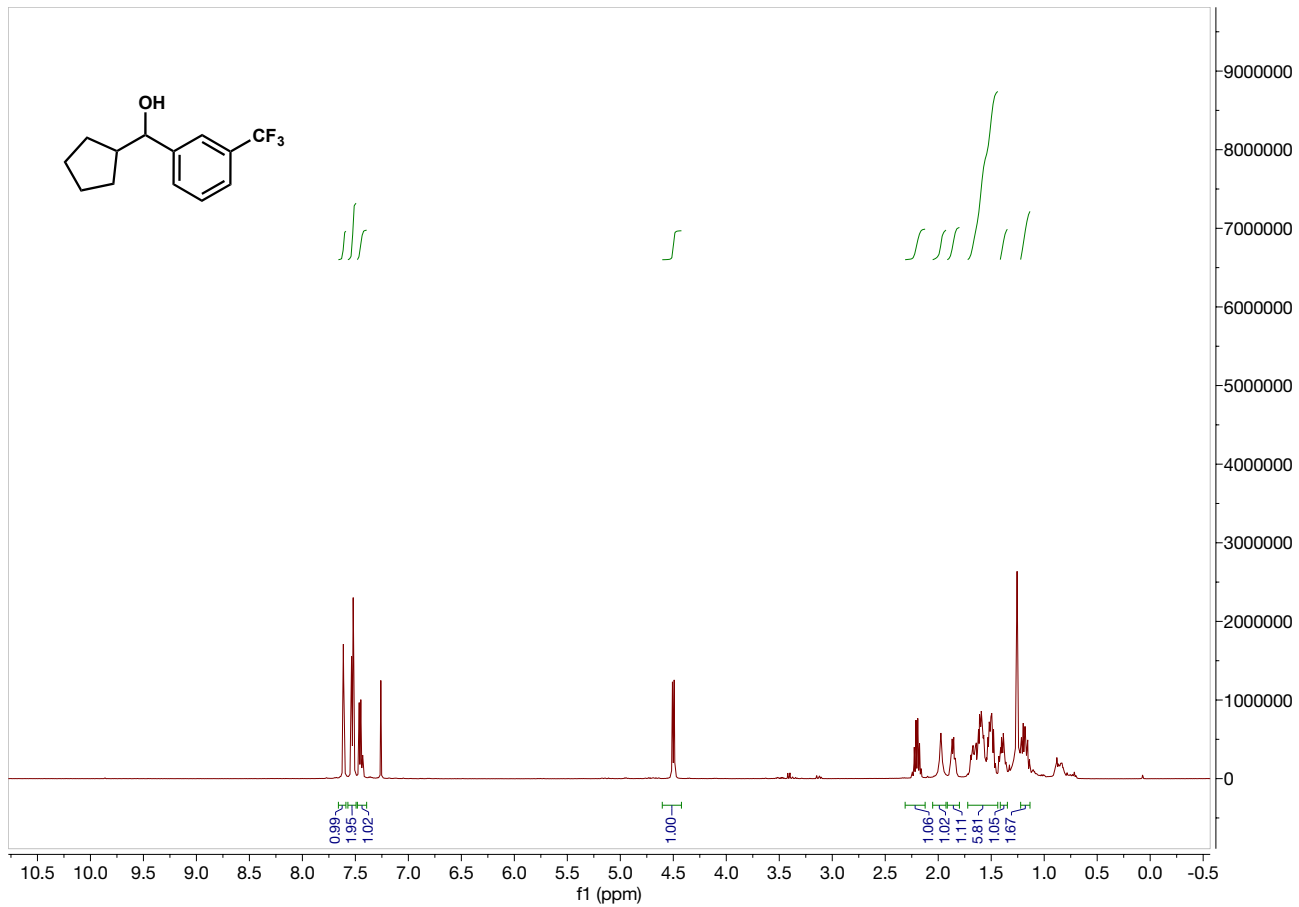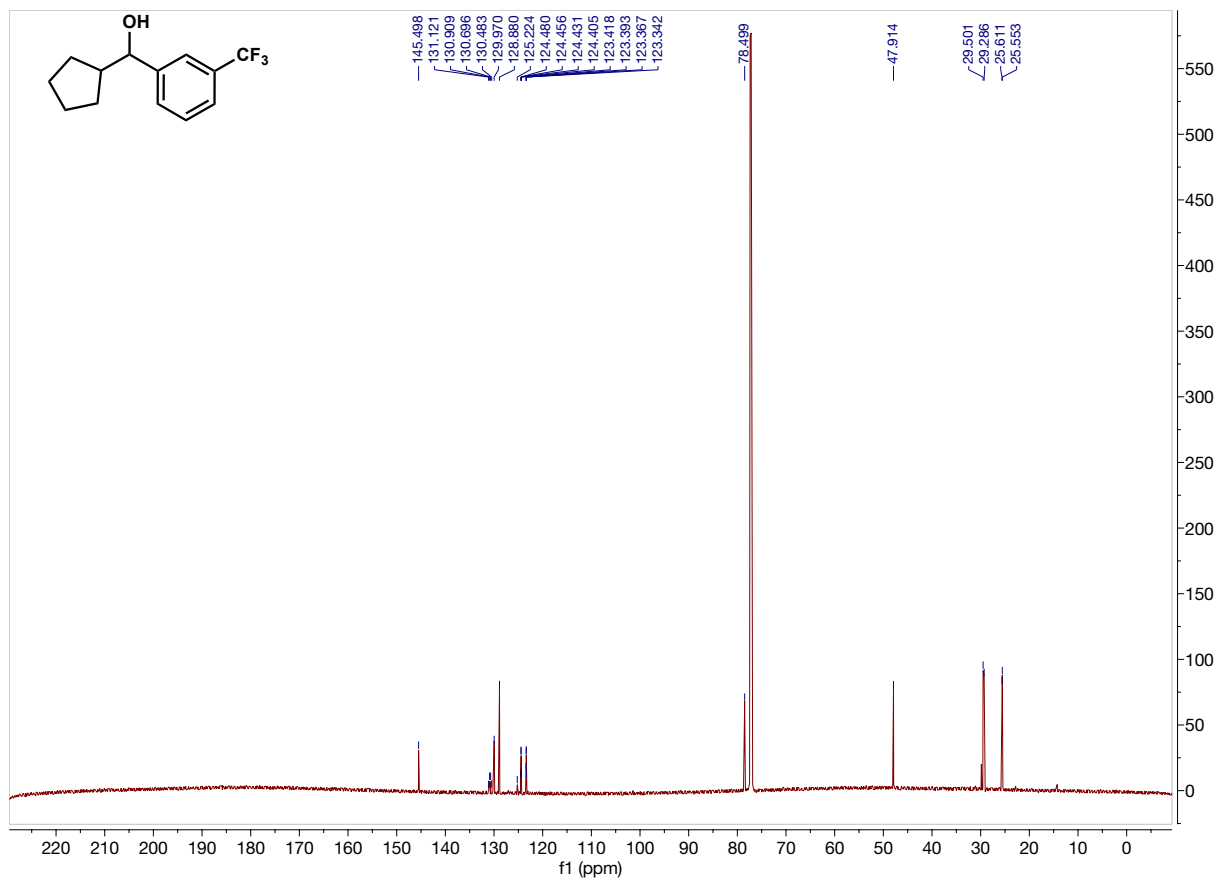

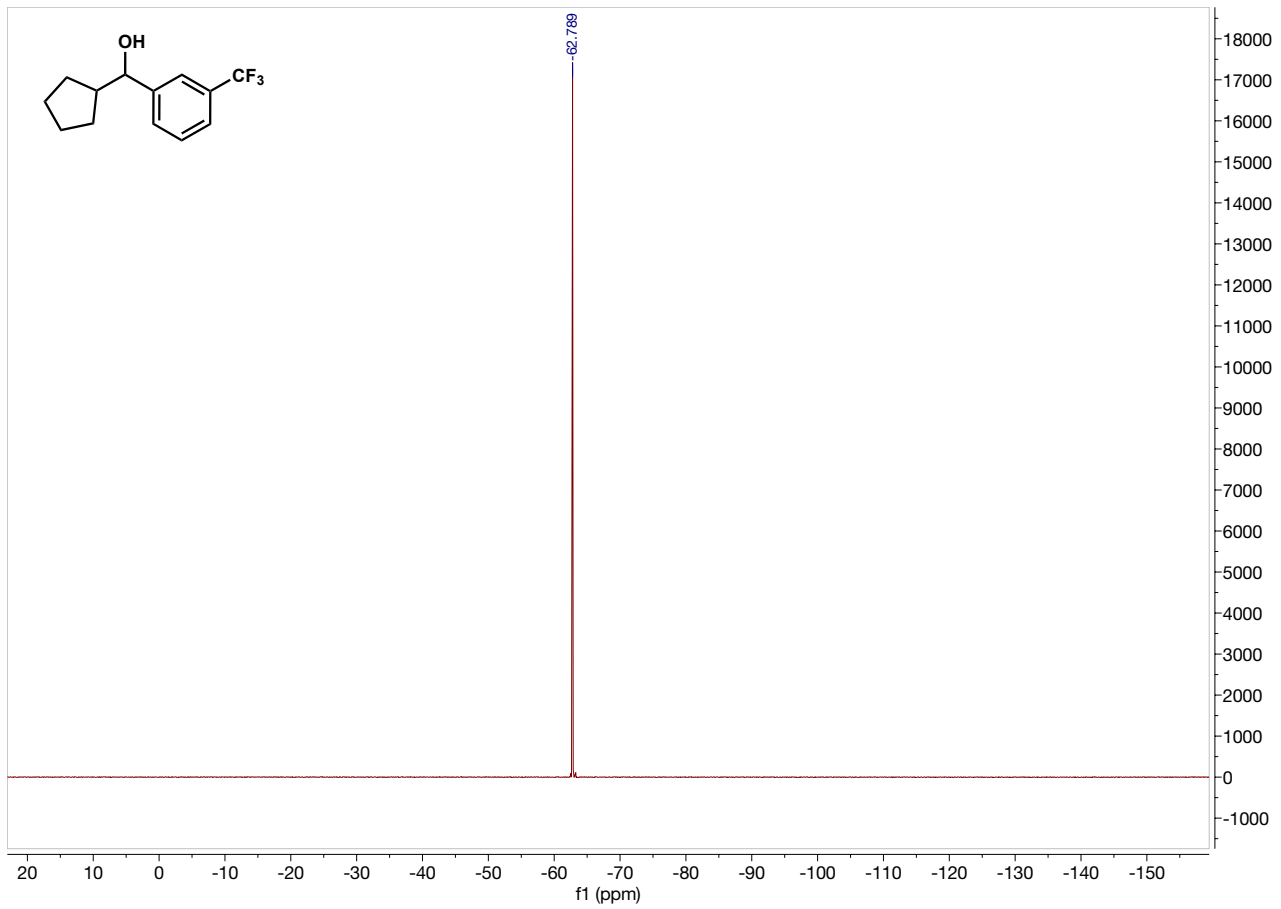

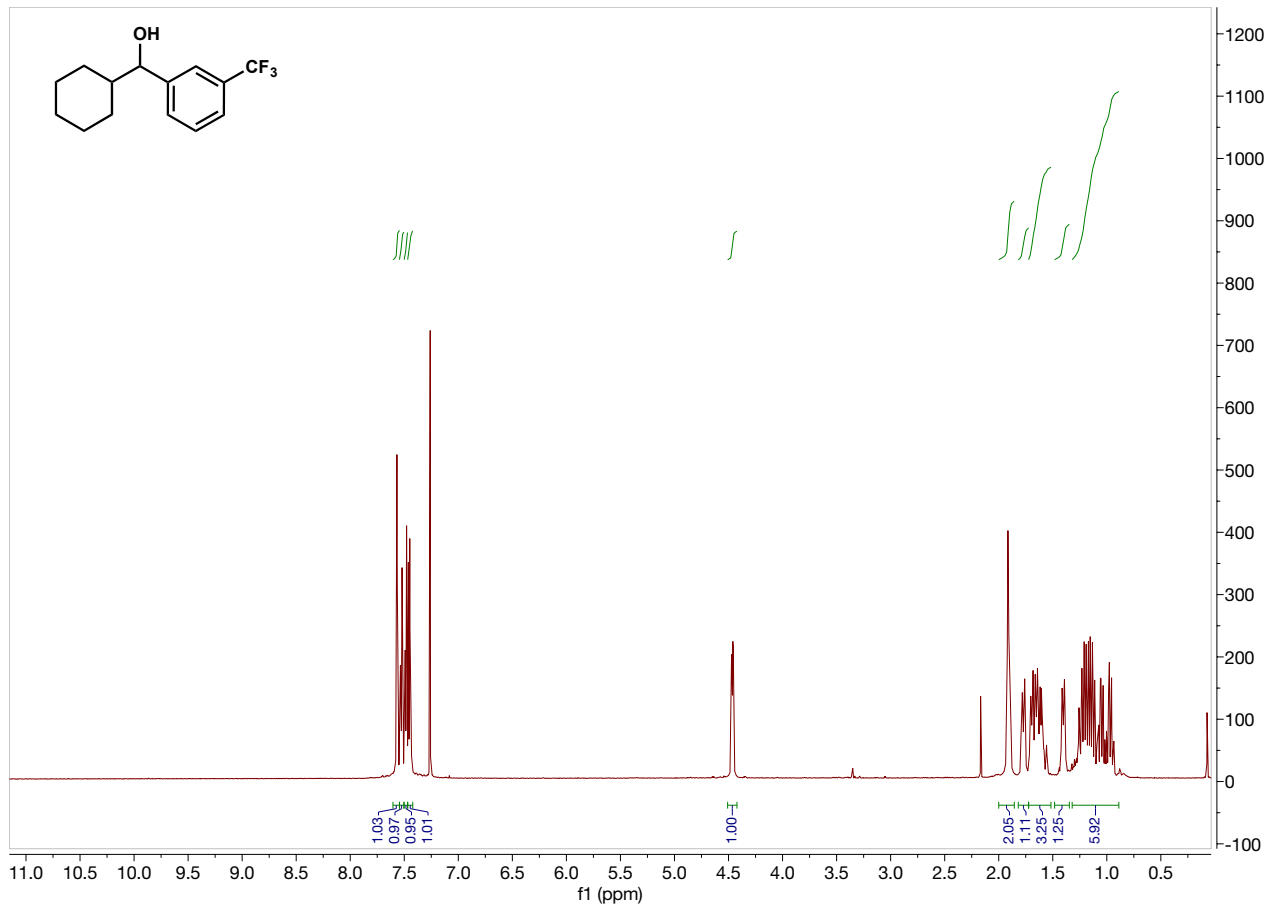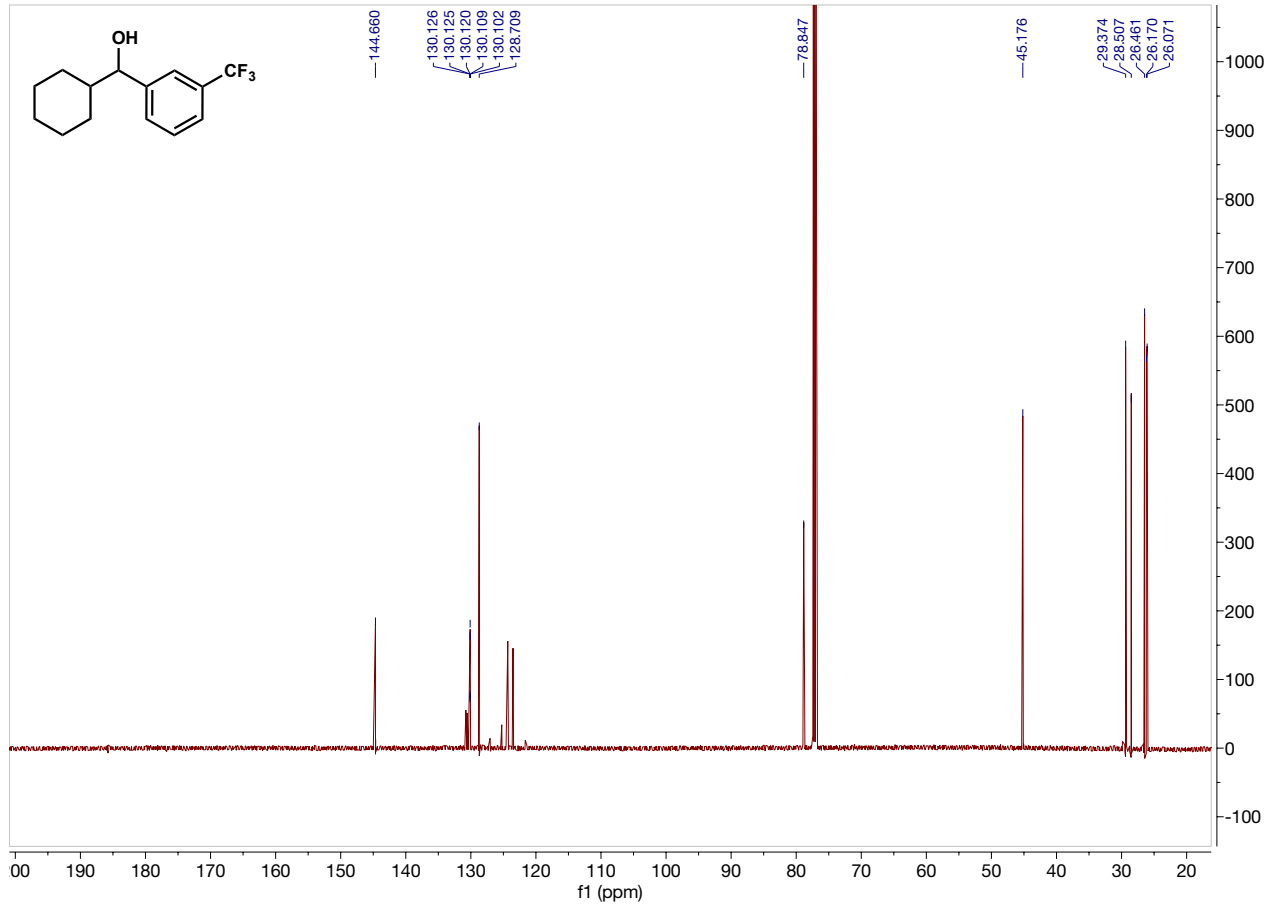

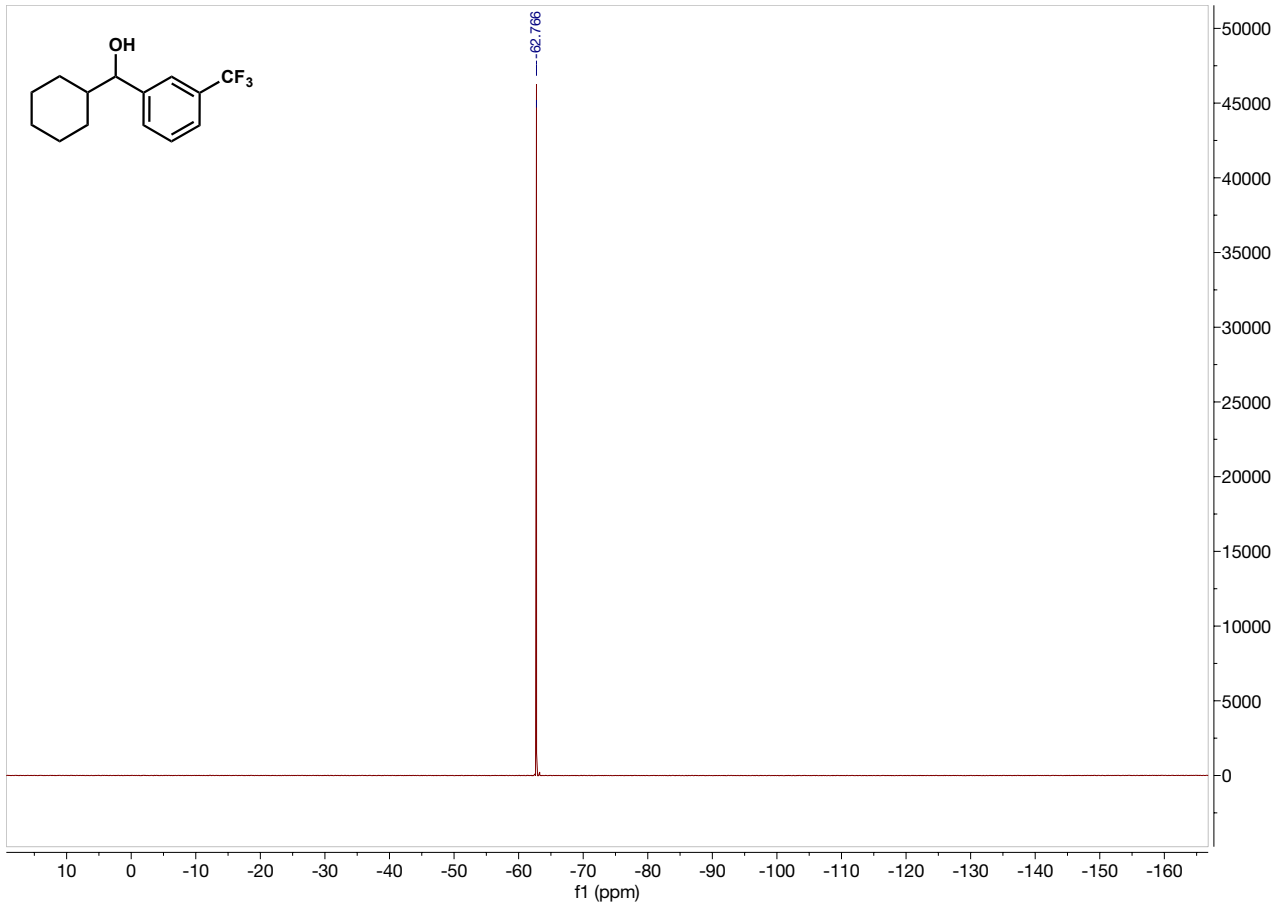

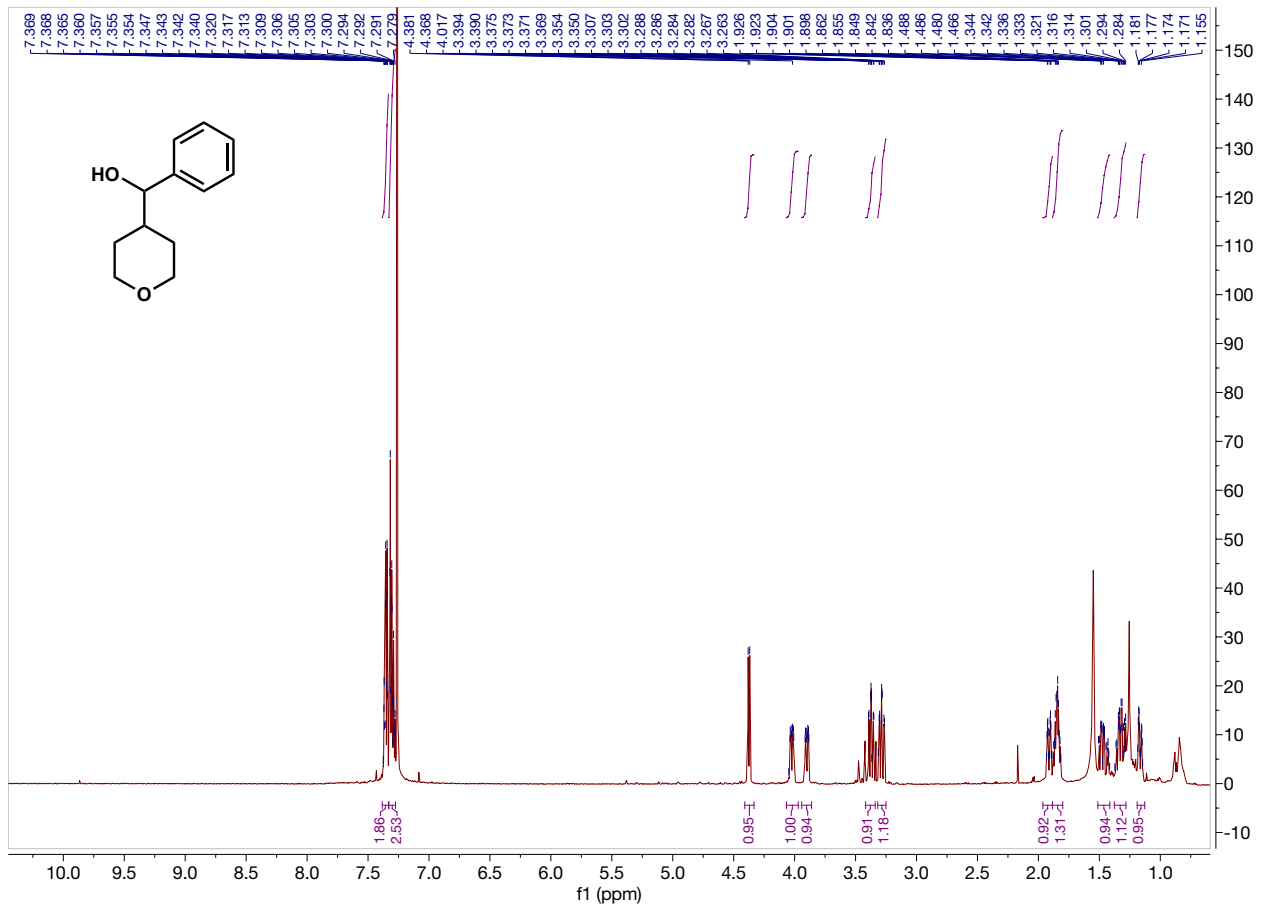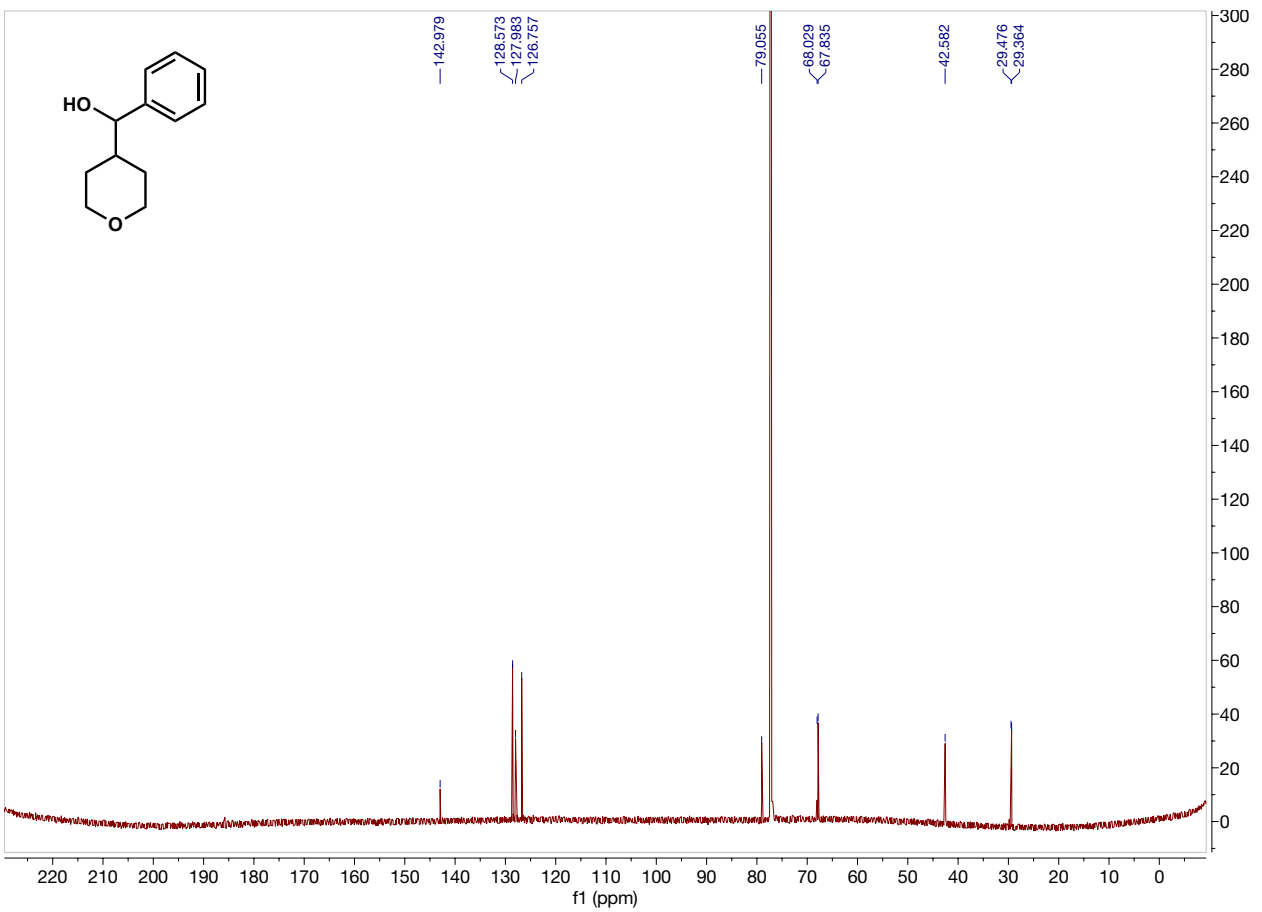

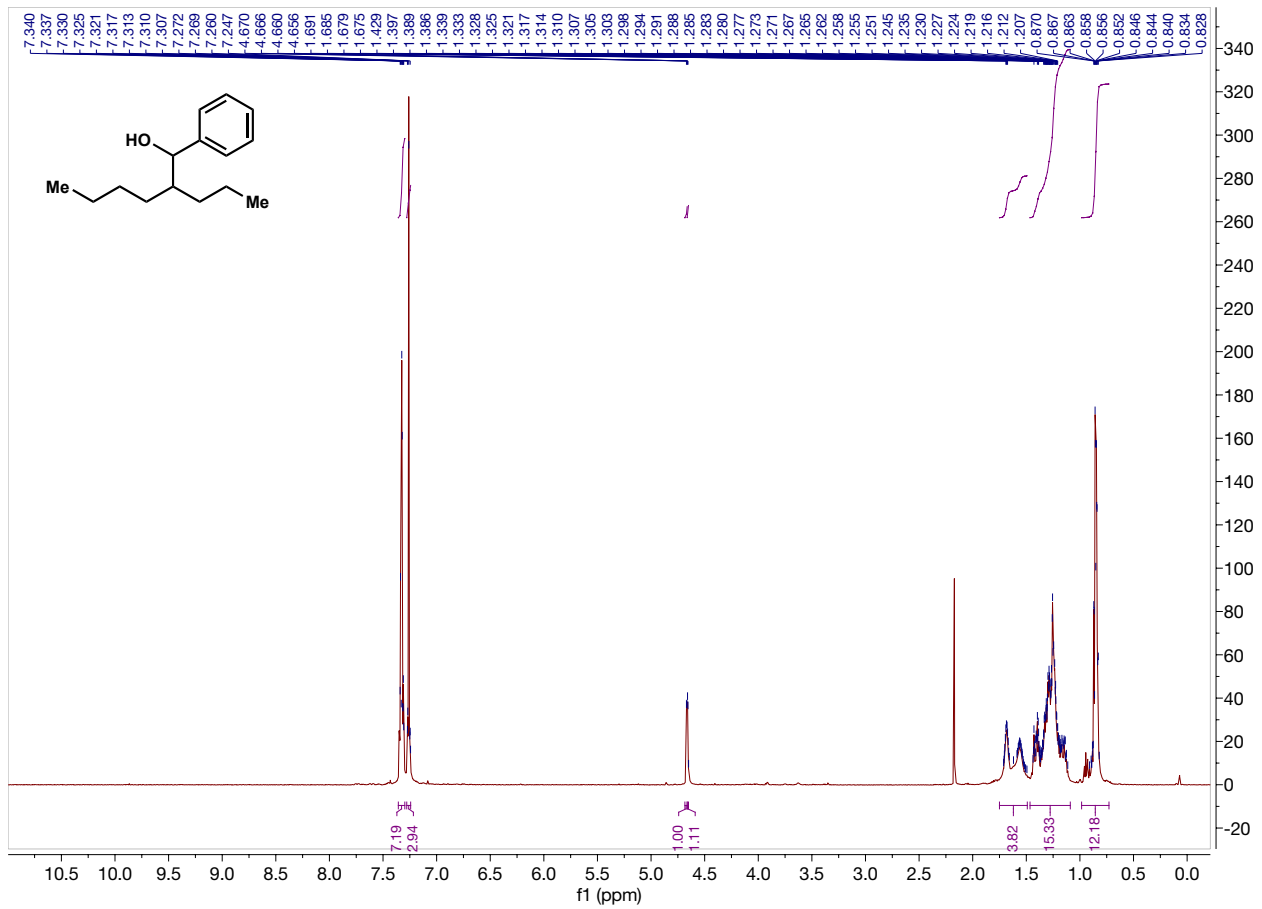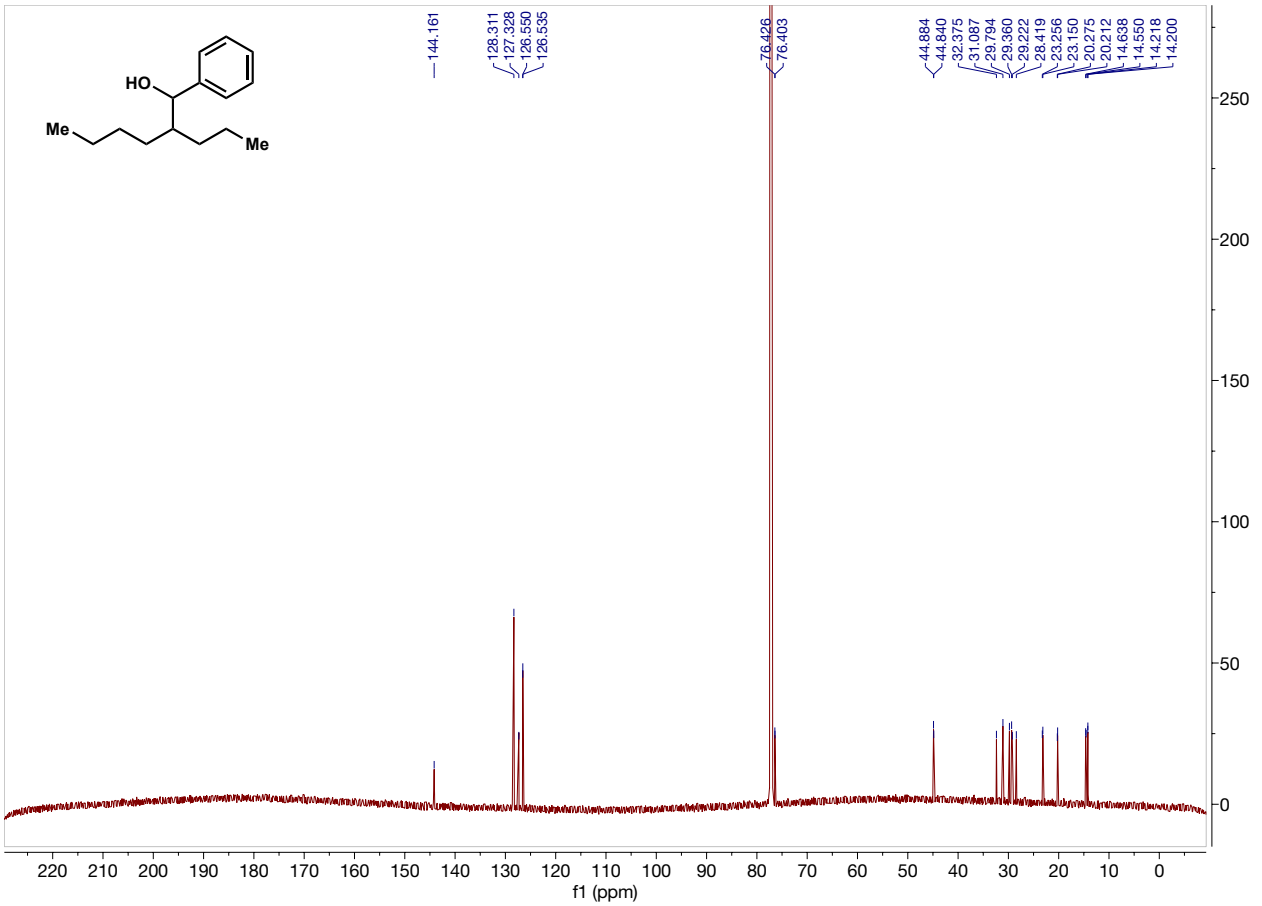



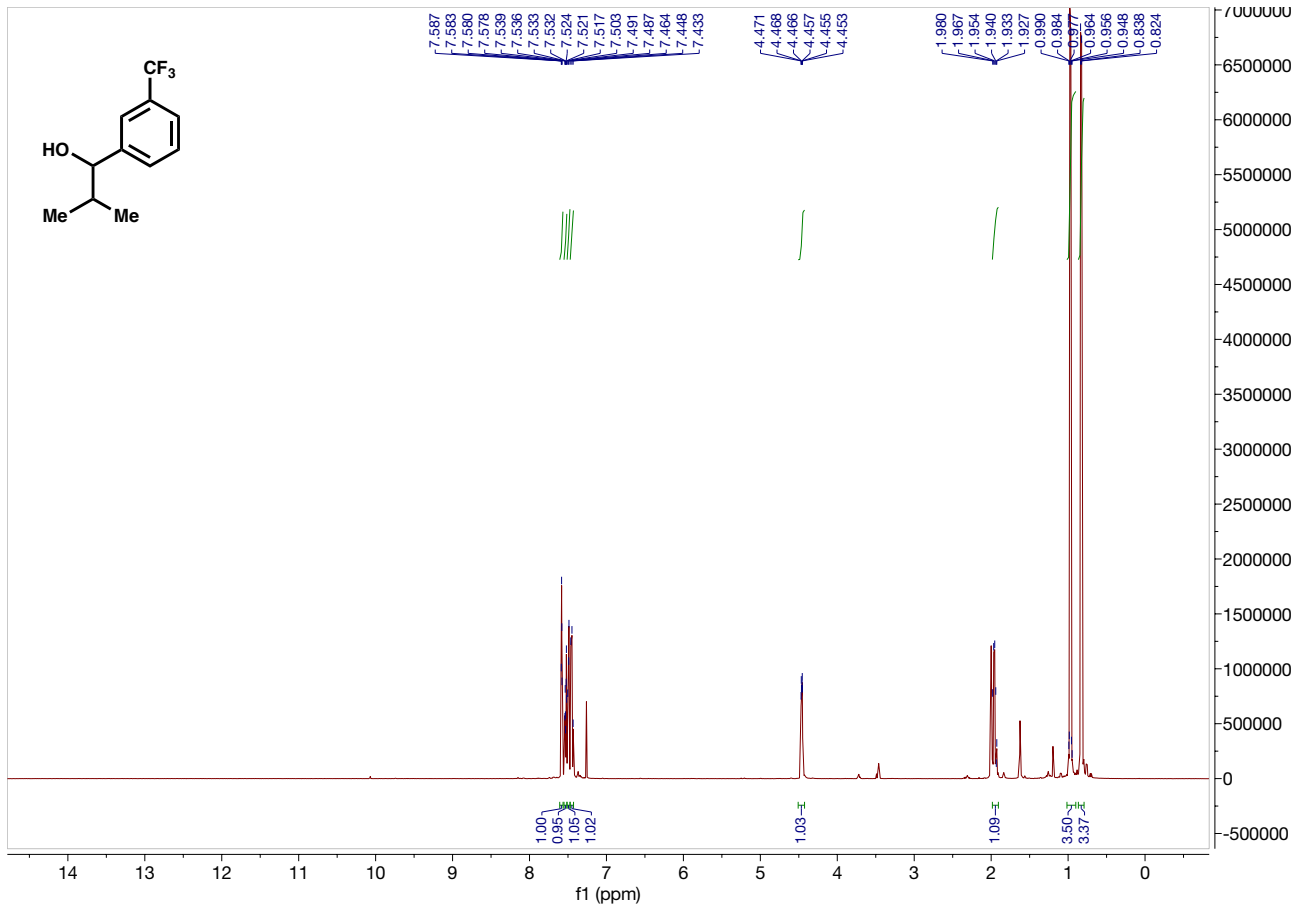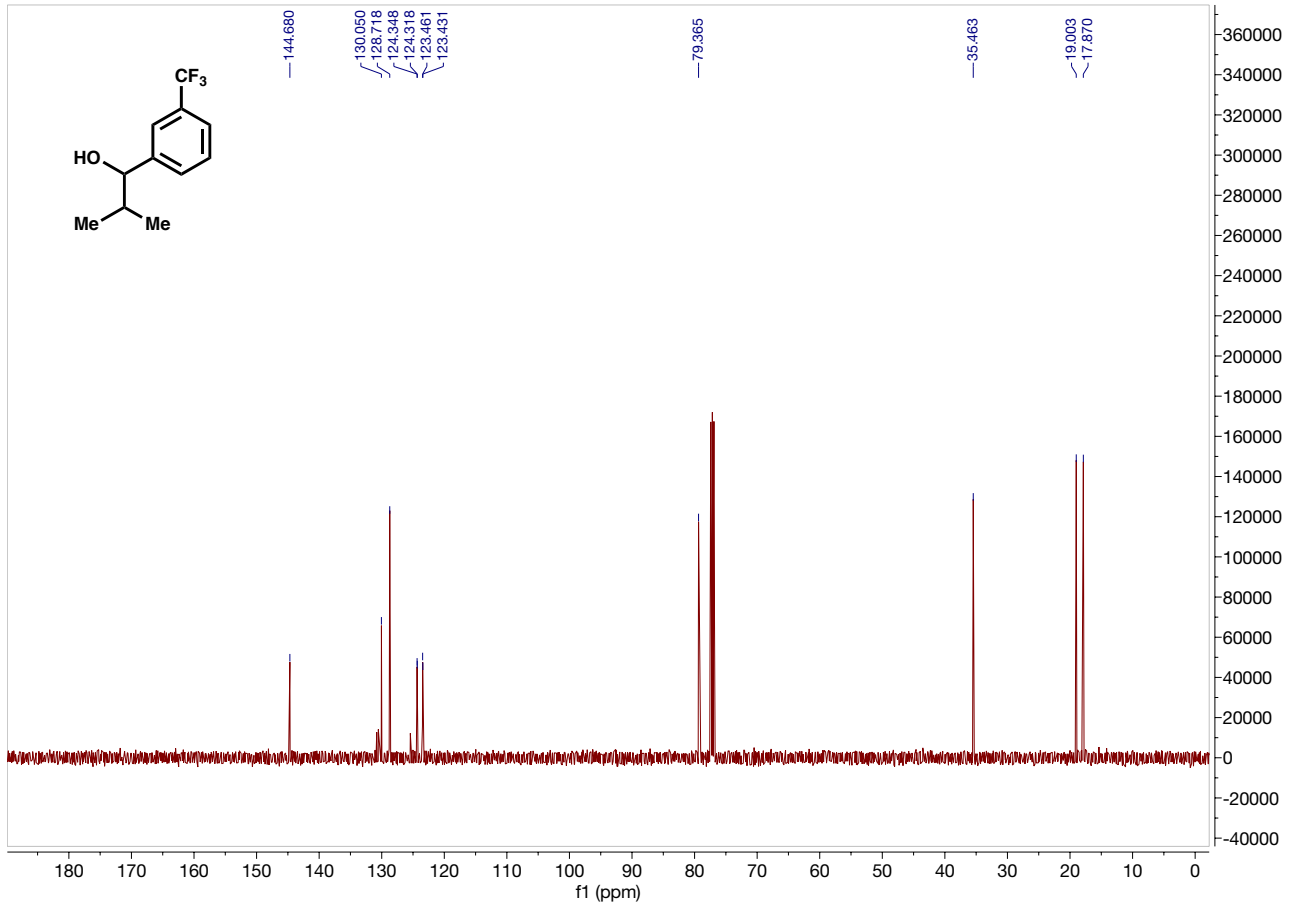

## J. References

- <sup>i</sup> Obradors, C. L.; Martinez, R.; Shenvi, R. A. Ph(*i*-PrO)SiH<sub>2</sub>: An Exceptional Reductant for Metal-Catalyzed Hydrogen Atom Transfers. *J. Am. Chem. Soc.* **2016**, *138*, 4962.
- <sup>ii</sup> Ford, D. D.; Nielsen, L. P. C.; Zuend, S. J.; Musgrave, C. B.; Jacobsen, E. N. Mechanistic Basis for High Stereoselectivity and Broad Substrate Scope in the (salen)Co(III)-Catalyzed Hydrolytic Kinetic Resolution. *J. Am. Chem. Soc.* **2013**, *135*, 15595.
- <sup>iii</sup> Apte, A.D., Tare V, B. P., Extent of oxidation of Cr(III) to Cr(VI) under various conditions pertaining to natural environment. *J. Hazard. Mater.* **2006**, *128*, 164.
- <sup>iv</sup> Morales, S.; Guijarro, F. G.; García Ruano, J. L.; Cid, M. B. A General Aminocatalytic Method for the Synthesis of Aldimines. *J. Am. Chem. Soc.* **2014**, *136*, 1082.
- <sup>v</sup> Backes, B. J.; Dragoli, D. R.; Ellman, J. A. Chiral N-Acyl-tert-butanefulfonamides: The “Safety-Catch” Principle Applied to Diastereoselective Enolate Alkylations. *J. Org. Chem.*, **1999**, *64*, 5472.
- <sup>vi</sup> Shaw, M. H.; Croft, R. A.; Whittingham, W. G.; Bower, J. F. Modular Access to Substituted Azocanes via a Rhodium-Catalyzed Cycloaddition–Fragmentation Strategy. *J. Am. Chem. Soc.* **2015**, *137*, 8054.
- <sup>vii</sup> Green, A. A.; Vásquez-Céspedes, S.; Shenvi, R. A. Iron–Nickel Dual-Catalysis: A New Engine for Olefin Functionalization and the Formation of Quaternary Centers. *J. Am. Chem. Soc.*, **2018**, *140*, 11317.
- <sup>viii</sup> Uchiyama, M.; Furuyama, T.; Kobayashi, M.; Matsumoto, Y.; Tanaka, K.; Toward a Protecting-Group-Free Halogen–Metal Exchange Reaction: Practical, Chemoselective Metalation of Functionalized Aromatic Halides Using Dianion-type Zincate, tBu<sub>4</sub>ZnLi<sub>2</sub>. *J. Am. Chem. Soc.* **2006**, *128*, 8404.
- <sup>ix</sup> Singh, P.; Kaur, M.; Holzer, W. Synthesis and evaluation of indole, pyrazole, chromone and pyrimidine based conjugates for tumor growth inhibitory activities – Development of highly efficacious cytotoxic agents. *Eur. J. Med. Chem.*, **2010**, *45*, 4968.
- <sup>x</sup> Hu, K.-F.; Ning, X.-S.; Qu, J.-P.; Kang, Y.-B. Tuning Regioselectivity of Wacker Oxidation in One Catalytic System: Small Change Makes Big Step. *J. Org. Chem.*, **2018**, *83*, 11327.
- <sup>xi</sup> Beak, P.; Hunter, J. E.; Jun, Y. M.; Walli, A. P. Complex-induced proximity effects: remote lithiations of carboxamides *J. Am. Chem. Soc.* **1987**, *109*, 5403.
- <sup>xii</sup> Parsons, S.R.; Hooper, J.F.; Willis, M.C. O-Substituted Alkyl Aldehydes for Rhodium-Catalyzed Intermolecular Alkyne Hydroacylation: The Utility of Methylthiomethyl Ethers. *Org. Lett.* **2011**, *13*, 998.
- <sup>xiii</sup> Zhao, X.; Zhang, Y.; Wei, L.; Hu, H.; Huang, Z.; Huan, A.; Wu, J.; Feng, Z. Esterification mechanism of lignin with different catalysts based on lignin model compounds by mechanical activation-assisted solid-phase synthesis. *RSC Advances*, **2017**, 52382.
- <sup>xiv</sup> Fernández-Salas, J. A.; Maestro, M. C.; Rodríguez-Fernández, M. M.; García-Ruano, J. L.; Alonso, I. Intermolecular Alkyl Radical Additions to Enantiopure N-tert-Butanesulfinyl Aldimines. *Org. Lett.* **2013**, *15*, 1658.
- <sup>xv</sup> Huang, W.; Ye, J.-L.; Zheng, W.; Dong, H. Q.; Wei, B.-W. Radical Migration–Addition of N-tert-Butanesulfinyl Imines with Organozinc Reagents. *J. Org. Chem.*, **2013**, *78*, 11229.
- <sup>xvi</sup> Robak, M. T.; Herbage, M. A.; Ellman, J. A. Synthesis and Applications of tert-Butanesulfinamide. *Chem. Rev.* **2010**, *110*, 3600.
- <sup>xvii</sup> (US20130064794A1).
- <sup>xviii</sup> Malkov, A. V.; Bourhani, Z.; Kocovsky, P. Amino acid-derived hydroxamic acids as chiral ligands in the vanadium catalysed epoxidation. *Organic & Biomolecular Chemistry*, **2005**, *3*, 3194.
- <sup>xix</sup> Shevick, S. L.; Obradors, C.; Shenvi, R. A. Mechanistic Interrogation of Co/Ni-Dual Catalyzed Hydroarylation. *J. Am. Chem. Soc.* **2018**, *140*, 12056.
- <sup>xx</sup> Andrez, J.; Guidal, V.; Scopelliti, R.; Pécaut, J.; Gambarelli, S.; Mazzanti, M. Ligand and Metal Based Multielectron Redox Chemistry of Cobalt Supported by Tetradentate Schiff Bases. *J. Am. Chem. Soc.*, **2017**, *139*, 8628.
